# Supplementary material for: All-trans retinoic acid enhances the anti-tumour effects of fimaporfin-based photodynamic therapy
Source: bioRxiv or medRxiv preprint supplement (doi:10.1101/2022.04.28.487643), 2022-08-08
Supplement: Supplementary file [file media-1.pdf]

## Supplementary Figure legends

**Supplementary Fig. 1. ATRA alone is sub-toxic at physiological/therapeutic relevant concentrations in HT-29, HCT116, and SKBR3 cells.** Relative cell viability in cells incubated with increasing ATRA concentrations (0–100  $\mu\text{M}$ ) for 48 hours. Data presented as mean of three experiments  $\pm$  S.E.

**Supplementary Fig. 2. ATRA pre-conditioning enhances fimaporfin-PDT in MDA-MB-231 and MC-38 cells.** Left panel, relative cell viability of MDA-MB-231 cells after 18 hrs co-incubation with 10  $\mu\text{M}$  ATRA and 0.4  $\mu\text{g/mL}$  TPCS<sub>2a</sub> prior to light exposure (PDT). Viability (MTT) was assessed 48 hours after PDT. Representative experiment of three independent experiments, data presented as mean of triplicates  $\pm$  S.D Right panel, relative cell viability of MC-38 cells after 42 hrs pre-incubation of 1  $\mu\text{M}$  ATRA including 18 hrs co-incubation with 0.6  $\mu\text{g/mL}$  TPCS<sub>2a</sub> prior to light exposure (PDT). Viability (MTT) was assessed 24 hours after PDT. Representative experiment of three independent experiments, data presented as mean of triplicates  $\pm$  S.D. \*  $p < 0.05$ , \*\*\*  $p < 0.001$

**Supplementary Fig. 3. ATRA do not enhance fimaporfin-PDT when given after light.** ATRA incubation for 48 hours after PDT does not induce enhanced cytotoxicity. HT-29 (left panel) and MC-38 cells (right panel) were incubated with 1  $\mu\text{M}$  and 10  $\mu\text{M}$  ATRA, respectively. Representative experiment of three independent experiments, data presented as mean of triplicates  $\pm$  S.D.

**Supplementary Fig. 4. ATRA+light is non-toxic and no phototoxic products are generated after light exposure of ATRA and fimaporfin (TPCS<sub>2a</sub>) in a cell-free system.**

(A) ATRA alone in HT-29 (0.1  $\mu$ M) and MDA-MB-231 (10  $\mu$ M) cells exposed to increasing light exposure. Viability evaluated 48 hours post-light exposure. (B) 0.1  $\mu$ M ATRA and 0.4  $\mu$ g/mL fimaporfin (TPCS<sub>2a</sub>) exposed to light ex vivo and subsequently incubated for 48 hours in HT-29 cells. Representative experiment of at least two experiments, data presented as mean of triplicates  $\pm$  S.D.

**Supplementary Fig. 5. Sub-lethal ATRA concentrations does not significantly affect the differential marker alkaline phosphatase and the stem cell marker CD133.**

(A) Alkaline phosphatase expression per mg protein and (B), relative CD133 expression in HCT116, SKBR3 and HT-29 incubated with 0.1–1  $\mu$ M ATRA for 42 hours. Data presented as mean of three experiments  $\pm$  S.E.

**Supplementary Fig. 6. Drug-protein and protein-protein interaction network of retinoic acid and DEGs (ATRA+PDT versus ATRA) of at least 1 log<sub>2</sub>-fold change.**

(A) The drug-gene and protein-protein interaction network from the STITCH database of retinoic acid. The block represents the drug and circle represents gene. Associations are indicated with a line. Stronger associations are represented by thicker lines. (B) Protein-protein network from the STRING database. Each circle represents a protein. Association between the proteins is indicated with a line.

**Supplementary Fig. 7. Treatment response following systemic ATRA and fimaporfin-PDT (ATRA+PDT) in HT-29 -tumor bearing mice.**

(A) Relative body weight in the ATRA-treatment group. The animals received ATRA i.p. once a day for five days. The weight of each animal was normalized to the weight at the day -4. (B) ATRA+PDT group received five doses of ATRA prior to light treatment. 10 mg/kg ATRA was delivered intraperitoneally once a day for five days. TPCS2a (5 mg/kg) was delivered as a single dose intravenously three days prior to laser exposure with a light dose of 15 J/cm<sup>2</sup> using an irradiance of 90 mW/cm<sup>2</sup>. The Kaplan-Meier survival curve shows the treatment response and the table shows the estimated time to reach endpoint in the different treatment groups. Note that ATRA+PDT group is only 2 animals as 4 animals had severe toxic effects after systemic delivery of ATRA. Consequently, it was decided to co-deliver ATRA and fimaporfin/TPCS2a by intratumoral injections in the further experiments (Figure 5 + Supplementary Fig.8). (C) Mean tumor volume (mm<sup>3</sup>), and (D) waterfall plots of each treatment group at 5, 10, and 20 days post-treatment. Each bar indicate an individual animal and percentage change of tumor size compared to day 0. NT, ATRA and PDT: 6 mice per group, except for ATRA+PDT where n = 2. Data presented as mean ± S.E.

**Supplementary Fig. 8. Survival and tumor response following intratumoral injection of ATRA and fimaporfin, and photochemical treatment.**

(A) Waterfall plots of each treatment group at 5, 10 and 20 days post-treatment. Each bar indicate an individual animal. The tumor size at indicated time-point relative to tumor size at treatment start (day 0). (B) Tumor volume (mm<sup>3</sup>) of individual animal in each treatment group up to 90 days post-treatment. Each line represents one animal. (C) Survival curve of treatment response and table of estimated mean time (days) to reach endpoint for each treatment groups. For all treatment groups n = 5, except for NT where n = 6. Survival evaluated using log-rank (Mantel-Cox) \* p ≤ 0.05. (D) Tumor size (mm<sup>3</sup>) of animals in each group that reached day 90.
