# Supplementary material for: All-trans retinoic acid enhances the anti-tumour effects of fimaporfin-based photodynamic therapy
Source: bioRxiv or medRxiv preprint supplement (doi:10.1101/2022.04.28.487643), 2022-08-08

Supplementary Figure 6

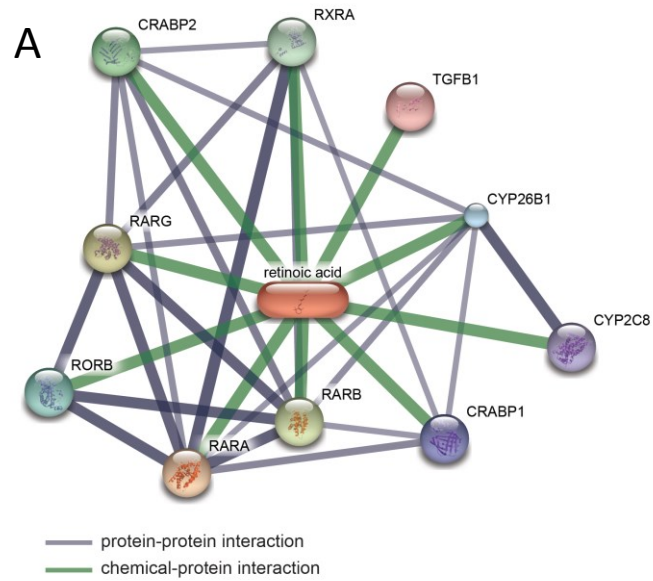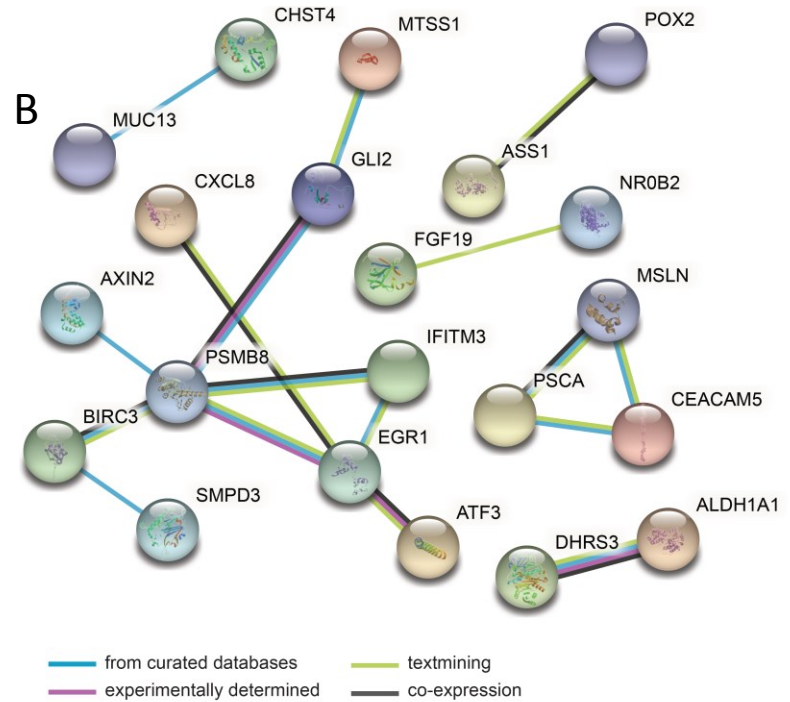

Supplement: Supplementary file [file media-7.pdf]
