# Supplementary material for: All-trans retinoic acid enhances the anti-tumour effects of fimaporfin-based photodynamic therapy
Source: bioRxiv or medRxiv preprint supplement (doi:10.1101/2022.04.28.487643), 2022-08-08

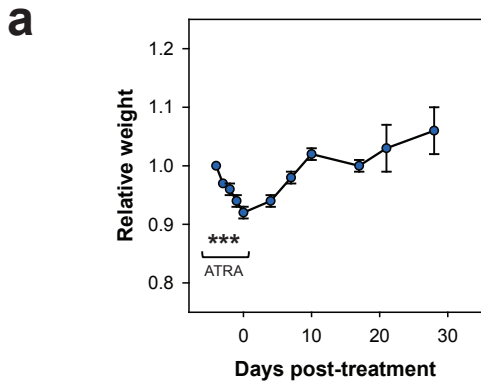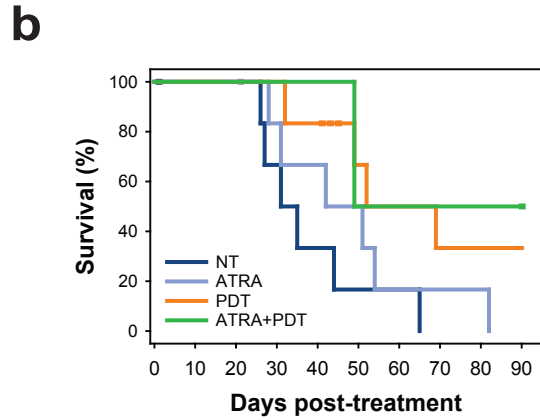

| Treatment group | Mean time to reach endpoint (days) | S.E. | No. of animals |
|-----------------|------------------------------------|------|----------------|
| NT              | 38.0                               | 6.0  | 6              |
| ATRA            | 48.0                               | 8.0  | 6              |
| PDT             | 63.7                               | 8.8  | 6              |
| ATRA+PDT        | 69.5                               | 14.5 | 2              |

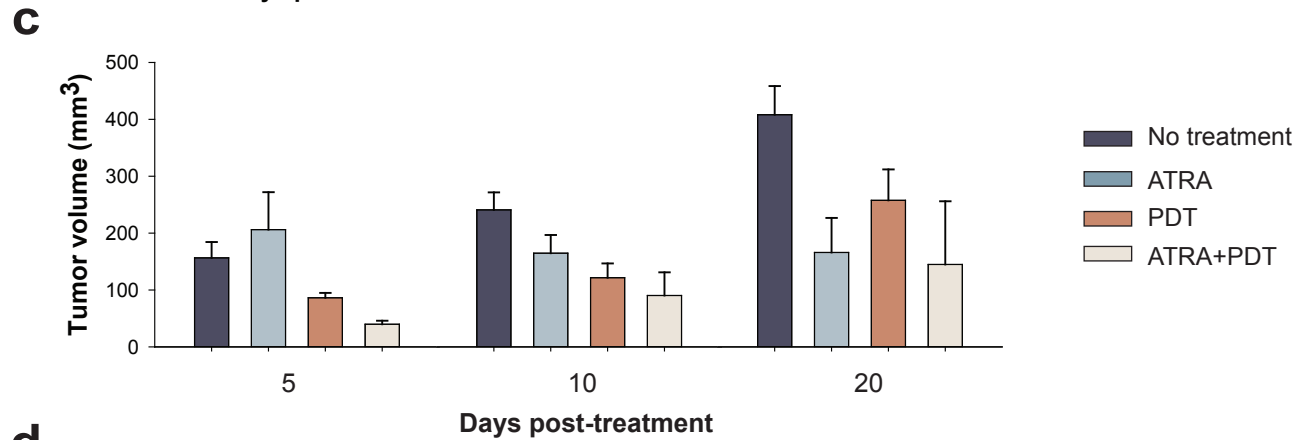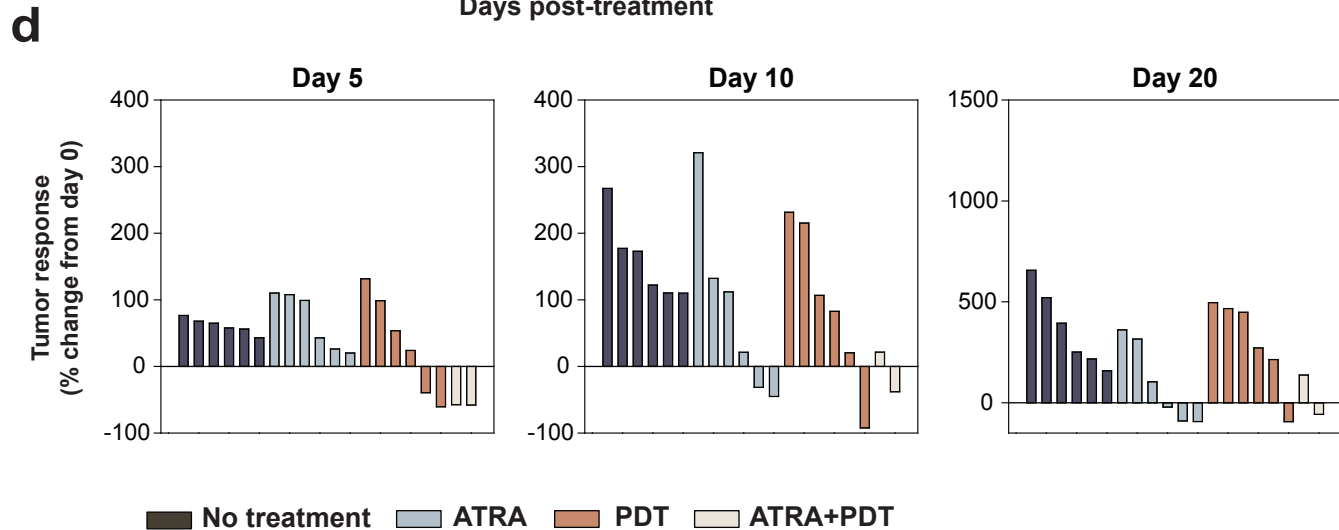

Supplement: Supplementary file [file media-8.pdf]
