# Supplementary material for: All-trans retinoic acid enhances the anti-tumour effects of fimaporfin-based photodynamic therapy
Source: bioRxiv or medRxiv preprint supplement (doi:10.1101/2022.04.28.487643), 2022-08-08
Supplement: Supplementary file [file media-9.pdf]

# Supplementary Figure 8

**a**

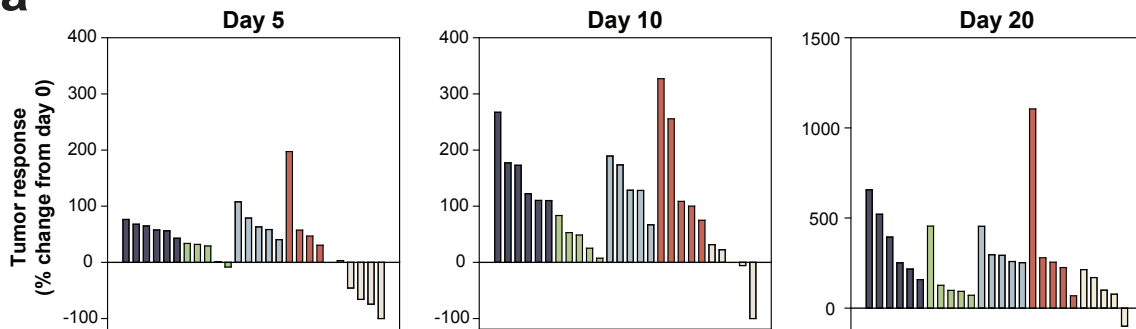

■ No treatment ■ PBS ■ ATRA ■ PDT ■ ATRA+PDT

**b**

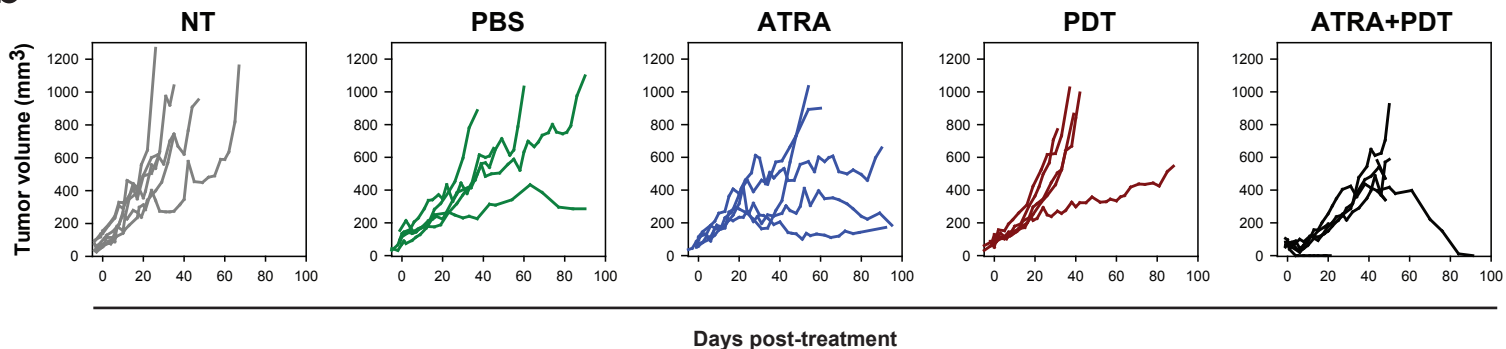

**c**

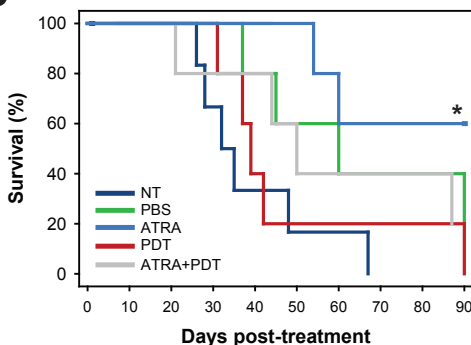

| Treatment group | Mean time to reach endpoint (days) | S.E. | No. of animals |
|-----------------|------------------------------------|------|----------------|
| NT              | 38.0                               | 6.0  | 6              |
| PBS             | 64.4                               | 11.1 | 5              |
| ATRA            | 76.8                               | 8.1  | 5              |
| PDT             | 47.8                               | 10.7 | 5              |
| ATRA+PDT        | 58.4                               | 13.2 | 5              |

**d**

**Tumor size (mm<sup>3</sup>) at day 90**

| PBS    | ATRA  | PDT    | ATRA+PDT |
|--------|-------|--------|----------|
| 1098.1 | 658.0 | 1022.4 | 0        |
| 285.9  | 259.9 |        |          |
|        | 172.2 |        |          |
