# Supplementary material for: All-trans retinoic acid enhances the anti-tumour effects of fimaporfin-based photodynamic therapy
Source: bioRxiv or medRxiv preprint supplement (doi:10.1101/2022.04.28.487643), 2022-08-08
Supplement: Supplementary file [file media-11.pdf]

Table S2: Significant DEGs with a  $|\log_2(\text{fold change})|$  of  $\geq 1$  after ATRA+PDT compared to PDT.

| gene                 | locus                          | sample_1 | sample_2 | value_1  | value_2  | log2(fold_change) | p_value | q_value    |
|----------------------|--------------------------------|----------|----------|----------|----------|-------------------|---------|------------|
| Up-regulated genes   |                                |          |          |          |          |                   |         |            |
| FAM131B              | chr7:143050492-143059840       | PDT      | ATRA+PDT | 0.409476 | 3.47658  | 3.08582           | 0.00005 | 0.00102476 |
| RARRES1              | chr3:158414896-158450275       | PDT      | ATRA+PDT | 2.68665  | 16.1452  | 2.58723           | 0.00005 | 0.00102476 |
| MDK                  | chr11:46402617-46405375        | PDT      | ATRA+PDT | 4.9587   | 26.8511  | 2.43695           | 0.00005 | 0.00102476 |
| CYP24A1              | chr20:52769987-52790516        | PDT      | ATRA+PDT | 0.491874 | 2.60664  | 2.40583           | 0.00005 | 0.00102476 |
| PSMB8                | chr6_ssto_hap7:4239266-4252521 | PDT      | ATRA+PDT | 1.01457  | 4.79809  | 2.24159           | 0.00005 | 0.00102476 |
| RARRES3              | chr11:63014620-63330855        | PDT      | ATRA+PDT | 7.65704  | 32.1209  | 2.06866           | 0.00005 | 0.00102476 |
| REN                  | chr1:204123943-204135465       | PDT      | ATRA+PDT | 0.636161 | 2.66058  | 2.06428           | 0.00005 | 0.00102476 |
| CTSS                 | chr1:150702671-150738433       | PDT      | ATRA+PDT | 0.43546  | 1.76088  | 2.01569           | 0.00005 | 0.00102476 |
| FGF19                | chr11:69513005-69519106        | PDT      | ATRA+PDT | 6.27328  | 25.0306  | 1.9964            | 0.00005 | 0.00102476 |
| TXK                  | chr4:48068409-48136273         | PDT      | ATRA+PDT | 0.361822 | 1.3053   | 1.85103           | 0.00005 | 0.00102476 |
| SERPINA3             | chr14:95078713-95090390        | PDT      | ATRA+PDT | 0.68675  | 2.43736  | 1.82746           | 0.0001  | 0.00194145 |
| ALDH1L1              | chr3:125822407-125899485       | PDT      | ATRA+PDT | 0.337508 | 1.1976   | 1.82715           | 0.00005 | 0.00102476 |
| IGFBP6               | chr12:53491435-53496128        | PDT      | ATRA+PDT | 31.6079  | 110.977  | 1.81191           | 0.00005 | 0.00102476 |
| CHST4                | chr16:71560022-71572493        | PDT      | ATRA+PDT | 0.355725 | 1.21076  | 1.76709           | 0.00015 | 0.00281494 |
| TAPBPL               | chr12:6561176-6579843          | PDT      | ATRA+PDT | 0.508899 | 1.72817  | 1.7638            | 0.00035 | 0.00584867 |
| LCN2                 | chr9:130911731-130915734       | PDT      | ATRA+PDT | 67.9208  | 229.774  | 1.75829           | 0.00005 | 0.00102476 |
| PARP10               | chr8:145051319-145060635       | PDT      | ATRA+PDT | 0.401217 | 1.33341  | 1.73267           | 0.00005 | 0.00102476 |
| TRIM31               | chr6_ssto_hap7:1401126-1411311 | PDT      | ATRA+PDT | 23.1248  | 76.6326  | 1.72852           | 0.00005 | 0.00102476 |
| AKAP12               | chr6:151561133-151679694       | PDT      | ATRA+PDT | 5.55638  | 17.5063  | 1.65566           | 0.00005 | 0.00102476 |
| MTSS1                | chr8:125563027-125740730       | PDT      | ATRA+PDT | 1.69547  | 5.32383  | 1.65078           | 0.00005 | 0.00102476 |
| DHRS3                | chr1:12627938-12677820         | PDT      | ATRA+PDT | 7.01205  | 21.5381  | 1.61899           | 0.00005 | 0.00102476 |
| IFITM3               | chr11:319672-320914            | PDT      | ATRA+PDT | 3.17628  | 9.52404  | 1.58423           | 0.00005 | 0.00102476 |
| WFDC2                | chr20:44098393-44110172        | PDT      | ATRA+PDT | 2.28187  | 6.53873  | 1.51879           | 0.0021  | 0.0238805  |
| SAMD9                | chr7:92728825-92747336         | PDT      | ATRA+PDT | 8.37085  | 23.382   | 1.48196           | 0.00005 | 0.00102476 |
| LOXL4                | chr10:100007442-100028007      | PDT      | ATRA+PDT | 1.62446  | 4.43023  | 1.44742           | 0.00005 | 0.00102476 |
| IL15RA               | chr10:5994333-6020150          | PDT      | ATRA+PDT | 1.29552  | 3.53252  | 1.44716           | 0.00005 | 0.00102476 |
| CNGA1                | chr4:47937993-48014961         | PDT      | ATRA+PDT | 0.664166 | 1.77801  | 1.42065           | 0.00005 | 0.00102476 |
| STRA6                | chr15:74471807-74502046        | PDT      | ATRA+PDT | 0.553158 | 1.47588  | 1.41581           | 0.00005 | 0.00102476 |
| SERPINA5             | chr14:95047730-95059457        | PDT      | ATRA+PDT | 0.689563 | 1.79855  | 1.38308           | 0.00005 | 0.00102476 |
| VAMP5                | chr2:85811530-85820511         | PDT      | ATRA+PDT | 3.04146  | 7.92904  | 1.38238           | 0.00005 | 0.00102476 |
| C10orf54             | chr10:73156690-73575704        | PDT      | ATRA+PDT | 1.13266  | 2.95064  | 1.38132           | 0.00005 | 0.00102476 |
| GABRP                | chr5:170210722-170241050       | PDT      | ATRA+PDT | 1.85944  | 4.52118  | 1.28183           | 0.00005 | 0.00102476 |
| C10orf10             | chr10:45455218-45490172        | PDT      | ATRA+PDT | 3.78595  | 9.13062  | 1.27006           | 0.00005 | 0.00102476 |
| ITPKA                | chr15:41786055-41795757        | PDT      | ATRA+PDT | 0.556708 | 1.31432  | 1.23932           | 0.00425 | 0.0420979  |
| BTN3A1               | chr6:26402464-26415444         | PDT      | ATRA+PDT | 0.773794 | 1.7837   | 1.20485           | 0.00005 | 0.00102476 |
| PLAC8                | chr4:84011210-84035911         | PDT      | ATRA+PDT | 2.40008  | 5.49895  | 1.19608           | 0.00005 | 0.00102476 |
| ATF3                 | chr1:212738675-212794119       | PDT      | ATRA+PDT | 97.0536  | 219.94   | 1.18025           | 0.00005 | 0.00102476 |
| HDAC9                | chr7:18126571-19036992         | PDT      | ATRA+PDT | 1.44155  | 3.20797  | 1.15404           | 0.00005 | 0.00102476 |
| LGALS9               | chr17:25958173-25976586        | PDT      | ATRA+PDT | 8.81966  | 19.451   | 1.14105           | 0.00005 | 0.00102476 |
| SLC2A12              | chr6:134308718-134373789       | PDT      | ATRA+PDT | 0.608026 | 1.3385   | 1.13841           | 0.00005 | 0.00102476 |
| CLU                  | chr8:27454433-27472328         | PDT      | ATRA+PDT | 4.61759  | 10.0572  | 1.12302           | 0.00005 | 0.00102476 |
| DUSP2                | chr2:96808907-96811179         | PDT      | ATRA+PDT | 12.1886  | 26.538   | 1.12252           | 0.00005 | 0.00102476 |
| CREB5                | chr7:28338939-28865511         | PDT      | ATRA+PDT | 3.6883   | 8.02894  | 1.12225           | 0.00005 | 0.00102476 |
| KCNE3                | chr11:74165885-74178600        | PDT      | ATRA+PDT | 3.59091  | 7.78606  | 1.11655           | 0.00005 | 0.00102476 |
| SMPD3                | chr16:68392229-68482409        | PDT      | ATRA+PDT | 2.86222  | 6.1399   | 1.10108           | 0.00005 | 0.00102476 |
| ALDH1A3              | chr15:101420008-101456830      | PDT      | ATRA+PDT | 17.4142  | 37.3478  | 1.10076           | 0.00005 | 0.00102476 |
| ARHGDI1              | chr12:15094949-15114562        | PDT      | ATRA+PDT | 20.5853  | 43.954   | 1.09438           | 0.00005 | 0.00102476 |
| NROB2                | chr1:27237974-27240567         | PDT      | ATRA+PDT | 1.38854  | 2.94617  | 1.08527           | 0.00055 | 0.0085238  |
| C1orf130             | chr1:24882566-24935818         | PDT      | ATRA+PDT | 1.04809  | 2.20534  | 1.07323           | 0.00005 | 0.00102476 |
| MMP7                 | chr11:102391238-102401478      | PDT      | ATRA+PDT | 71.2114  | 148.966  | 1.0648            | 0.00005 | 0.00102476 |
| IL8                  | chr4:74606222-74609433         | PDT      | ATRA+PDT | 14.3248  | 29.5956  | 1.04686           | 0.00005 | 0.00102476 |
| BIRC3                | chr11:102188180-102210135      | PDT      | ATRA+PDT | 1.25282  | 2.58     | 1.04219           | 0.00005 | 0.00102476 |
| MEGF6                | chr1:3404505-3528059           | PDT      | ATRA+PDT | 0.819526 | 1.67993  | 1.03554           | 0.00005 | 0.00102476 |
| EGR1                 | chr5:137801180-137805004       | PDT      | ATRA+PDT | 4.82157  | 9.81097  | 1.02489           | 0.00005 | 0.00102476 |
| HBEGF                | chr5:139712427-139726188       | PDT      | ATRA+PDT | 20.527   | 41.5863  | 1.01859           | 0.00005 | 0.00102476 |
| PELI2                | chr14:56585092-56768031        | PDT      | ATRA+PDT | 1.87101  | 3.7817   | 1.01522           | 0.00005 | 0.00102476 |
| Down-regulated genes |                                |          |          |          |          |                   |         |            |
| ID2                  | chr2:8822112-8824583           | PDT      | ATRA+PDT | 5.50856  | 2.75203  | -1.00118          | 0.00005 | 0.00102476 |
| SPDEF                | chr6:34505578-34524110         | PDT      | ATRA+PDT | 16.5058  | 8.19596  | -1.00999          | 0.00005 | 0.00102476 |
| HEPH                 | chrX:65382432-65487230         | PDT      | ATRA+PDT | 3.62214  | 1.79148  | -1.01569          | 0.00005 | 0.00102476 |
| AKR1C1               | chr10:5005453-5020158          | PDT      | ATRA+PDT | 50.1133  | 24.6981  | -1.02079          | 0.00005 | 0.00102476 |
| GLI2                 | chr2:121554866-121750229       | PDT      | ATRA+PDT | 1.73488  | 0.852615 | -1.02487          | 0.00005 | 0.00102476 |
| FXYD3                | chr19:35606731-35615228        | PDT      | ATRA+PDT | 17.5797  | 8.62688  | -1.027            | 0.00005 | 0.00102476 |
| FAM3D                | chr3:58619669-58652561         | PDT      | ATRA+PDT | 8.77298  | 4.24277  | -1.04806          | 0.00005 | 0.00102476 |
| CAPN9                | chr1:230883129-230937749       | PDT      | ATRA+PDT | 1.45467  | 0.70276  | -1.04958          | 0.00145 | 0.0179618  |
| ASS1                 | chr9:133320093-133376661       | PDT      | ATRA+PDT | 5.71336  | 2.75499  | -1.05229          | 0.00005 | 0.00102476 |
| LRRC31               | chr3:169557028-169587660       | PDT      | ATRA+PDT | 1.39178  | 0.656509 | -1.08404          | 0.0006  | 0.00910057 |
| MUC13                | chr3:124624288-124653595       | PDT      | ATRA+PDT | 28.9957  | 13.5277  | -1.09993          | 0.00005 | 0.00102476 |
| CEACAM6              | chr19:42259397-42276113        | PDT      | ATRA+PDT | 47.7562  | 22.2689  | -1.10066          | 0.00005 | 0.00102476 |
| S100A14              | chr1:153586731-153588808       | PDT      | ATRA+PDT | 76.7108  | 35.2653  | -1.12118          | 0.00005 | 0.00102476 |
| MSLN                 | chr16:810764-818865            | PDT      | ATRA+PDT | 2.81002  | 1.28159  | -1.13265          | 0.00005 | 0.00102476 |
| PRAP1                | chr10:135160843-135166187      | PDT      | ATRA+PDT | 3.20396  | 1.43399  | -1.15982          | 0.00515 | 0.0488381  |
| GPD1                 | chr12:50497800-50505095        | PDT      | ATRA+PDT | 2.28955  | 1.01978  | -1.1668           | 0.00005 | 0.00102476 |
| HES6                 | chr2:239146907-239148681       | PDT      | ATRA+PDT | 5.73401  | 2.55042  | -1.16881          | 0.00005 | 0.00102476 |
| GRHL3                | chr1:24645811-24741587         | PDT      | ATRA+PDT | 1.75026  | 0.776258 | -1.17296          | 0.002   | 0.0229388  |
| DPEP1                | chr16:89679715-89704839        | PDT      | ATRA+PDT | 6.81875  | 2.92142  | -1.22284          | 0.00005 | 0.00102476 |
| WNT11                | chr11:75897369-75917574        | PDT      | ATRA+PDT | 4.1994   | 1.77853  | -1.2395           | 0.00005 | 0.00102476 |
| CEACAM5              | chr19:42212529-42234437        | PDT      | ATRA+PDT | 12.0597  | 5.06265  | -1.25223          | 0.00005 | 0.00102476 |
| ALDH1A1              | chr9:75515577-75568233         | PDT      | ATRA+PDT | 405.218  | 165.602  | -1.29098          | 0.00005 | 0.00102476 |
| BGN                  | chrX:152760346-152775004       | PDT      | ATRA+PDT | 16.5827  | 6.73104  | -1.30078          | 0.00005 | 0.00102476 |
| ANKS4B               | chr16:21245015-21263750        | PDT      | ATRA+PDT | 1.89722  | 0.765152 | -1.31007          | 0.00005 | 0.00102476 |
| AIFM3                | chr22:21319417-21335649        | PDT      | ATRA+PDT | 1.47668  | 0.587014 | -1.33089          | 0.00005 | 0.00102476 |
| IGSF1                | chrX:130407482-130423403       | PDT      | ATRA+PDT | 3.04443  | 1.18424  | -1.36221          | 0.00005 | 0.00102476 |
| PPP1R1B              | chr17:37783176-37792878        | PDT      | ATRA+PDT | 8.15642  | 2.98407  | -1.45065          | 0.00005 | 0.00102476 |
| DDC                  | chr7:50526133-50633154         | PDT      | ATRA+PDT | 11.9731  | 4.23146  | -1.50057          | 0.00005 | 0.00102476 |
| RNASE4               | chr14:21152335-21168758        | PDT      | ATRA+PDT | 2.37664  | 0.837993 | -1.50391          | 0.00085 | 0.0119898  |
| PSCA                 | chr8:143751725-143764145       | PDT      | ATRA+PDT | 1.7825   | 0.615034 | -1.53516          | 0.002   | 0.0229388  |
| SOSTDC1              | chr7:16501105-16505474         | PDT      | ATRA+PDT | 1.20435  | 0.404531 | -1.57393          | 0.0015  | 0.0184954  |
| AXIN2                | chr17:63524682-63557740        | PDT      | ATRA+PDT | 14.4559  | 4.59396  | -1.65385          | 0.00005 | 0.00102476 |
| CCL15                | chr17:34310691-34329084        | PDT      | ATRA+PDT | 15.6012  | 4.77259  | -1.70881          | 0.00005 | 0.00102476 |
| ABCC2                | chr10:101542462-101611662      | PDT      | ATRA+PDT | 1.13309  | 0.335678 | -1.75511          | 0.00005 | 0.00102476 |
| PRODH                | chr22:18900286-18924066        | PDT      | ATRA+PDT | 1.66635  | 0.459819 | -1.85756          | 0.0001  | 0.00194145 |
| LEPREL1              | chr3:189674516-189840226       | PDT      | ATRA+PDT | 3.14966  | 0.868411 | -1.85875          | 0.00005 | 0.00102476 |
| ST6GALNAC1           | chr17:74620844-74639894        | PDT      | ATRA+PDT | 1.73672  | 0.466286 | -1.89708          | 0.00005 | 0.00102476 |
| HHLA2                | chr3:108021331-108097126       | PDT      | ATRA+PDT | 4.62643  | 1.14286  | -2.01725          | 0.00005 | 0.00102476 |
| ANXA13               |                                |          |          |          |          |                   |         |            |
