# Supplementary material for: All-trans retinoic acid enhances the anti-tumour effects of fimaporfin-based photodynamic therapy
Source: bioRxiv or medRxiv preprint supplement (doi:10.1101/2022.04.28.487643), 2022-08-08
Supplement: Supplementary file [file media-12.pdf]

Table S3: Pathways identification after ATRA+PDT compared to PDT.

| Ingenuity Canonical Pathways                                                  | -log(p-value) | Ratio  | z-score | Molecules                                                                                                                                                                                                                              |
|-------------------------------------------------------------------------------|---------------|--------|---------|----------------------------------------------------------------------------------------------------------------------------------------------------------------------------------------------------------------------------------------|
| Aryl Hydrocarbon Receptor Signaling                                           | 5.89          | 0.154  | 1.155   | ALDH1A1,ALDH1A3,ALDH1B1,ALDH1L1,ALDH2,ALDH7A1,CCNA2,CDK6,CYP1A1,FAS,FOS,GSTA4,HSPB1,JUN,NCOA3,NCOA7,NQO2,NR0B2,NR1P1,RARG,TGFB2,TGM2                                                                                                   |
| Tryptophan Degradation X (Mammalian, via Tryptamine)                          | 5.88          | 0.36   | 0       | AKR1B10,ALDH1A1,ALDH1A3,ALDH1B1,ALDH2,ALDH7A1,DDC,MAOA,MAOB                                                                                                                                                                            |
| Putrescine Degradation III                                                    | 5.5           | 0.381  | 0.707   | ALDH1A1,ALDH1A3,ALDH1B1,ALDH2,ALDH7A1,MAOA,MAOB,SAT1                                                                                                                                                                                   |
| Unfolded protein response                                                     | 4.95          | 0.214  | 2.333   | CEBPA,CEBPD,DNAJB9,DNAJC3,ERN1,HSPA1A/HSPA1B,HSPA1L,HSPA6,HSPH1,INSIG1,PPARG,PPP1R15A                                                                                                                                                  |
| Oxidative Ethanol Degradation III                                             | 4.76          | 0.368  | -0.378  | ACSL1,ACSS2,ALDH1A1,ALDH1A3,ALDH1B1,ALDH2,ALDH7A1                                                                                                                                                                                      |
| Superpathway of Cholesterol Biosynthesis                                      | 4.32          | 0.276  | -2.828  | ACAT1,HMGCR,HMGCS2,IDI1,LSS,MSMO1,SC5D,SOLE                                                                                                                                                                                            |
| Ethanol Degradation IV                                                        | 4.15          | 0.304  | -0.378  | ACSL1,ACSS2,ALDH1A1,ALDH1A3,ALDH1B1,ALDH2,ALDH7A1                                                                                                                                                                                      |
| VDR/RXR Activation                                                            | 4.09          | 0.167  | -0.378  | CEBPA,CYP24A1,GADD45A,IGFBP6,KLF4,KLK6,MXD1,NCOA3,PRKCA,RUNX2,SEMA3B,TGFB2,VDR                                                                                                                                                         |
| Histamine Degradation                                                         | 4.03          | 0.353  | 0       | ALDH1A1,ALDH1A3,ALDH1B1,ALDH2,ALDH7A1,AOC1                                                                                                                                                                                             |
| Tumor Microenvironment Pathway                                                | 3.95          | 0.119  | 0.218   | CD44,CSPG4,CXCL8,CXCR4,FAS,FGF19,FOS,HLA-B,HLA-C,HLA-E,IGF2,JUN,LGALS9,MAP3K14,MMP15,MMP7,PIK3R1,PTGS2,RAP2B,SLC16A1,TGFB2                                                                                                             |
| Senescence Pathway                                                            | 3.81          | 0.102  | 1.512   | ACVR1,ATF3,CAPN5,CAPN9,CBX7,CDC25A,CDK6,CDKN2B,CGAS,CXCL8,DMTF1,E2F7,ELF3,ETS1,GADD45A,GADD45B,HIPK2,ITPR2,JUN,PKK4,PIK3R1,PML,PPP2R5B,RAP2B,SMAD3,TGFB2,TGFB2,ZFP36L1                                                                 |
| Aldosterone Signaling in Epithelial Cells                                     | 3.67          | 0.12   | -0.816  | ASIC1,DNAJA1,DNAJB1,DNAJB4,DNAJB9,DNAJC2,DNAJC3,DUSP1,HSPA1A/HSPA1B,HSPA1L,HSPA4L,HSPA6,HSPB1,HSPH1,ITPR2,PIK3R1,PIP5K1A,PRKCA,SGK1                                                                                                    |
| Molecular Mechanisms of Cancer                                                | 3.63          | 0.09   | #NUM!   | AURKA,BBC3,BIRC3,BMP4,CASP7,CASP9,CDK25A,CDK6,CDKN2B,DVL1,E2F7,FAS,FOS,FYN,GAB1,GAB2,GLI1,GNA14,GNAI1,GNAZ,HIPK2,JUN,PIK3R1,PMAP1,PRKAR2A,PRKCA,RAP2B,RASA1,RHOB,RHOD,RHO,RND3,SMAD3,TGFB2,TGFB2,WNT11                                 |
| PXR/RXR Activation                                                            | 3.61          | 0.169  | #NUM!   | ABCC2,ALDH1A1,CPT1A,CYP2B6,CYP3A5,HMGCS2,HNF4A,NR0B2,PCK2,PRKAR2A,UGT1A10 (includes others)                                                                                                                                            |
| Fatty Acid $\alpha$ -oxidation                                                | 3.58          | 0.3    | 0.816   | ALDH1A1,ALDH1A3,ALDH1B1,ALDH2,ALDH7A1,PTGS2                                                                                                                                                                                            |
| Protein Ubiquitination Pathway                                                | 3.5           | 0.0989 | #NUM!   | B2M,BIRC3,DNAJA1,DNAJB1,DNAJB4,DNAJB9,DNAJC2,DNAJC3,HLA-B,HLA-C,HLA-E,HSPA1A/HSPA1B,HSPA1L,HSPA4L,HSPA6,HSPB1,HSPH1,NEDD4L,PSMB10,PSMB8,PSME1,PSME2,SMURF1,TAP2,UBC,USP11,USP53                                                        |
| Sumoylation Pathway                                                           | 3.39          | 0.136  | 0       | ARHGDI1B,CEBPA,DNMT3A,ETS1,FAS,FOS,JUN,MYB,PML,RHOB,RHOD,RHO,RND3,SP100                                                                                                                                                                |
| Death Receptor Signaling                                                      | 3.36          | 0.141  | 1.941   | ARHGDI1B,BIRC3,CASP7,CASP9,FAS,HSPB1,MAP3K14,MAP4K4,PARP10,PARP12,PARP14,PARP8,TIPARP                                                                                                                                                  |
| Dopamine Degradation                                                          | 3.35          | 0.233  | 0.378   | ALDH1A1,ALDH1A3,ALDH1B1,ALDH2,ALDH7A1,MAOA,MAOB                                                                                                                                                                                        |
| Huntington's Disease Signaling                                                | 3.27          | 0.1    | -2.324  | ATP5MC1,CAPN5,CAPN9,CASP4,CASP7,CASP9,CREB5,DNAJB1,GNA14,HDAC9,HSPA1A/HSPA1B,HSPA1L,HSPA6,JUN,PIK3R1,POLR2L,PRKCA,PSME1,PSME2,RASA1,SGK1,STX1A,TGM2,UBC                                                                                |
| LPS/IL-1 Mediated Inhibition of RXR Function                                  | 3.27          | 0.102  | 0.333   | ABCC2,ACSL1,ALDH1A1,ALDH1A3,ALDH1B1,ALDH1L1,ALDH2,ALDH7A1,CHST4,CPT1A,CYP2B6,CYP3A5,GSTA4,HMGCS2,IL1R2,IL1RN,JUN,MAOA,MAOB,NR0B2,NR5A2,SCARB1,SULT2B1                                                                                  |
| TGF- $\beta$ Signaling                                                        | 3.18          | 0.135  | 0.905   | ACVR1,BMP4,FOS,HNF4A,IRF7,JUN,RAP2B,RUNX2,SMAD3,SMURF1,TGFB2,TGFB2,VDR                                                                                                                                                                 |
| Ethanol Degradation II                                                        | 3.17          | 0.219  | -0.378  | ACSL1,ACSS2,ALDH1A1,ALDH1A3,ALDH1B1,ALDH2,ALDH7A1                                                                                                                                                                                      |
| Caveolar-mediated Endocytosis Signaling                                       | 3.16          | 0.151  | #NUM!   | B2M,CAV1,CD55,FLNB,FLOT1,FYN,HLA-B,HLA-C,HLA-E,ITGB6,PRKCA                                                                                                                                                                             |
| Endothelin-1 Signaling                                                        | 3.13          | 0.106  | 1.606   | CASP4,CASP7,CASP9,ECE2,EDN1,FOS,GAB1,GNA14,GNAI1,GNAZ,ITPR2,JUN,PIK3R1,PLAAT3,PLAAT4,PLD1,PLD2,PRKCA,PTGS2,RAP2B                                                                                                                       |
| NRF2-mediated Oxidative Stress Response                                       | 3.1           | 0.106  | 0.632   | ABCC1,ABCC2,AKR7A3,DNAJA1,DNAJA4,DNAJB1,DNAJB4,DNAJB9,DNAJC3,FOS,FOSL1,GSTA4,JUN,JUND,MAFF,NQO2,PIK3R1,PRKCA,RAP2B,SCARB1                                                                                                              |
| UVA-Induced MAPK Signaling                                                    | 3.09          | 0.133  | 0       | CASP9,FOS,JUN,PARP10,PARP12,PARP14,PARP8,PIK3R1,PRKCA,RAP2B,RPS6KB2,SMPD3,TIPARP                                                                                                                                                       |
| Xenobiotic Metabolism PXR Signaling Pathway                                   | 3.02          | 0.104  | 0.447   | ABCC2,ALDH1A1,ALDH1A3,ALDH1B1,ALDH1L1,ALDH2,ALDH7A1,CHST4,CYP2B6,CYP3A5,GSTA4,MAOA,MAOB,NR1P1,PPP1R10,PRKAR2A,PRKCA,SULT2B1,UGT1A10 (includes others),UGT8                                                                             |
| Cytotoxic T Lymphocyte-mediated Apoptosis of Target Cells                     | 3             | 0.206  | #NUM!   | B2M,CASP7,CASP9,FAS,HLA-B,HLA-C,HLA-E                                                                                                                                                                                                  |
| Noradrenaline and Adrenaline Degradation                                      | 2.92          | 0.2    | 0.378   | ALDH1A1,ALDH1A3,ALDH1B1,ALDH2,ALDH7A1,MAOA,MAOB                                                                                                                                                                                        |
| Interferon Signaling                                                          | 2.85          | 0.194  | 2.646   | IFI35,IFIT3,IFITM2,IFITM3,IFNGR2,IRF1,PSMB8                                                                                                                                                                                            |
| Xenobiotic Metabolism CAR Signaling Pathway                                   | 2.72          | 0.101  | 1.147   | ABCC1,ABCC2,ALDH1A1,ALDH1A3,ALDH1B1,ALDH1L1,ALDH2,ALDH7A1,CHST4,CYP1A1,CYP2B6,CYP3A5,GSTA4,NR1P1,PPP2R5B,PRKCA,SULT2B1,UGT1A10 (includes others),UGT8                                                                                  |
| Stearate Biosynthesis I (Animals)                                             | 2.67          | 0.163  | 0.378   | ACOT11,ACSL1,ELOVL6,GNPAT,HNF4A,MBOAT7,SRD5A3,TBXAS1                                                                                                                                                                                   |
| Retinoic acid Mediated Apoptosis Signaling                                    | 2.67          | 0.15   | 2.828   | CASP9,CRABP2,IRF1,PARP10,PARP12,PARP14,PARP8,RARG,TIPARP                                                                                                                                                                               |
| Antigen Presentation Pathway                                                  | 2.64          | 0.179  | #NUM!   | B2M,HLA-B,HLA-C,HLA-E,PSMB8,TAP2,TAPBP                                                                                                                                                                                                 |
| Xenobiotic Metabolism AHR Signaling Pathway                                   | 2.61          | 0.129  | 0.905   | ALDH1A1,ALDH1A3,ALDH1B1,ALDH1L1,ALDH2,ALDH7A1,CYP1A1,GSTA4,NQO2,NR1P1,UGT1A10 (includes others)                                                                                                                                        |
| p53 Signaling                                                                 | 2.6           | 0.122  | 1.265   | BBC3,FAS,GADD45A,GADD45B,HDAC9,HIPK2,JUN,PIK3R1,PMAP1,PML,SERPINE2,TRIM29                                                                                                                                                              |
| Cholesterol Biosynthesis I                                                    | 2.58          | 0.308  | -2      | LSS,MSMO1,SC5D,SOLE                                                                                                                                                                                                                    |
| Cholesterol Biosynthesis II (via 24,25-dihydrolanosterol)                     | 2.58          | 0.308  | -2      | LSS,MSMO1,SC5D,SOLE                                                                                                                                                                                                                    |
| Cholesterol Biosynthesis III (via Desmosterol)                                | 2.58          | 0.308  | -2      | LSS,MSMO1,SC5D,SOLE                                                                                                                                                                                                                    |
| Hepatic Fibrosis Signaling Pathway                                            | 2.57          | 0.082  | 0.18    | ACVR1,COL18A1,CREB5,CXCL8,DVL1,EDN1,FOS,GLI1,GLI2,GLIS2,GNAI1,IL1R2,IL1RN,IRS2,JUN,KLF9,NOX1,PIK3R1,PPARG,PRKAR2A,PRKCA,RAP2B,RHOB,RHOD,RHO,RND3,RPS6KB2,SMAD3,TGFB2,TGFB2,WNT11                                                       |
| Axonal Guidance Signaling                                                     | 2.52          | 0.0769 | #NUM!   | ABLIM1,ADAM8,ADAM9,ADAMTS6,BMP4,CXCR4,ECE2,EFNA1,EPHA2,EPHB6,ERAP2,FYN,GLI1,GLI2,GLIS2,GNA14,GNAI1,GNAZ,MMP15,MMP7,NR1,NTN4,PIK3R1,PLXNB2,PLXND1,PRKAR2A,PRKCA,RAP2B,RASA1,RHOD,SEMA3A,SEMA3B,SEMA3E,SEMA4B,SEMA7A,TUBA4A,TUBB2A,WNT11 |
| Virus Entry via Endocytic Pathways                                            | 2.45          | 0.118  | #NUM!   | B2M,CAV1,CD55,FLNB,FYN,HLA-B,HLA-C,HLA-E,ITGB6,PIK3R1,PRKCA,RAP2B                                                                                                                                                                      |
| Mevalonate Pathway I                                                          | 2.44          | 0.286  | -2      | ACAT1,HMGCR,HMGCS2,IDI1                                                                                                                                                                                                                |
| IL-8 Signaling                                                                | 2.44          | 0.095  | 1.606   | ANGPT1,CXCL1,CXCL8,FOS,GNAI1,HBEGF,JUN,MAP4K4,NOX1,PIK3R1,PLD1,PLD2,PRKCA,PTGS2,RAP2B,RHOB,RHOD,RHO,RND3                                                                                                                               |
| Hepatic Cholestasis                                                           | 2.42          | 0.0968 | #NUM!   | ABCC1,ABCC2,CLCF1,CXCL8,CYP3A5,FGF19,HNF4A,IL1R2,IL1RN,JUN,LIF,MAP3K14,NR0B2,NR5A2,PRKAR2A,PRKCA,TGFB2,TJP2                                                                                                                            |
| Granulocyte Adhesion and Diapedesis                                           | 2.39          | 0.0983 | #NUM!   | CC15,CLDN1,CLDN2,CLDN2,CXCL1,CXCL16,CXCL2,CXCL3,CXCL8,CXCR4,GNAI1,HRH1,IL1R2,IL1RN,MMP15,MMP7,SDC4                                                                                                                                     |
| Polyamine Regulation in Colon Cancer                                          | 2.39          | 0.217  | #NUM!   | MXD1,PPARG,PSME1,PSME2,SAT1                                                                                                                                                                                                            |
| IGF-1 Signaling                                                               | 2.38          | 0.115  | -0.333  | CASP9,CCN1,FOS,IGFBP2,IGFBP6,IRS2,JUN,PIK3R1,PRKAR2A,RAP2B,RASA1,RPS6KB2                                                                                                                                                               |
| Role of PKR in Interferon Induction and Antiviral Response                    | 2.36          | 0.11   | 1.387   | ATF3,CASP9,DNAJC3,EIF2AK2,FAS,FOS,HSPA1A/HSPA1B,HSPA1L,HSPA6,IFIH1,IFNGR2,IRF1,JUN                                                                                                                                                     |
| HIF1 $\alpha$ Signaling                                                       | 2.32          | 0.0927 | -1.147  | CNG2,EDN1,EGLN1,HK1,HSPA1A/HSPA1B,HSPA1L,HSPA6,IGF2,JUN,LDHA,MMP15,MMP7,NOX1,PIK3R1,PRKCA,RAP2B,RPS6KB2,SAT1,TGFB2                                                                                                                     |
| Glucocorticoid Receptor Signaling                                             | 2.27          | 0.0758 | #NUM!   | ANXA1,ATP5MC1,CAV1,CEBPA,CXCL3,CXCL8,DUSP1,FOS,HSPA1A/HSPA1B,HSPA1L,HSPA6,IL15RA,IL1R2,IL1RN,JUN,KRT13,KRT20,KRT7,KRT80,MAP3K14,NCOA3,NR1P1,PCK2,PKK4,PIK3R1,POLR2L,PPARG,PTGS2,RAP2B,SGK1,SMAD3,TGFB2,TGFB2,TSC22D3,UQCRCF5           |
| Coagulation System                                                            | 2.23          | 0.171  | 0       | F2R,F5,PROS1,SERPINA1,SERPINA5,TFPI                                                                                                                                                                                                    |
| RAR Activation                                                                | 2.23          | 0.0928 | #NUM!   | AKR1B10,AKR1C3,ALDH1A1,ALDH1A3,CRABP2,DHRS3,DUSP1,FOS,JUN,NR1P1,PIK3R1,PML,PRKAR2A,PRKCA,RARG,REL,SMAD3,TGFB2                                                                                                                          |
| Xenobiotic Metabolism Signaling                                               | 2.21          | 0.0836 | #NUM!   | ABCC2,ALDH1A1,ALDH1A3,ALDH1B1,ALDH1L1,ALDH2,ALDH7A1,CHST4,CYP1A1,CYP2B6,CYP3A5,GSTA4,MAOA,MAOB,MAP3K14,NQO2,NR1P1,PIK3R1,PPP2R5B,PRKCA,RAP2B,SULT2B1,UGT1A10 (includes others),UGT8                                                    |
| Anandamide Degradation                                                        | 2.18          | 0.667  | #NUM!   | FAAH,NAAA                                                                                                                                                                                                                              |
| Systemic Lupus Erythematosus In B Cell Signaling Pathway                      | 2.15          | 0.0836 | 3.545   | BCL10,CLCF1,CXCL8,FOS,FYN,GAB1,IFIH1,IFIT3,IFNGR2,INPPL1,IRF7,JUN,LIF,MAP3K14,MAP4K4,MCL1,PAG1,PIK3R1,PLAAT4,PRKCA,RAP2B,TGFB2,TRAF4                                                                                                   |
| Salvage Pathways of Pyrimidine Ribonucleotides                                | 2.14          | 0.112  | 0       | AK4,APOBEC3B,CDK6,DAPK1,EIF2AK2,GRK5,NME3,NME4,PIM1,PKN1,SGK1                                                                                                                                                                          |
| FXR/RXR Activation                                                            | 2.12          | 0.103  | #NUM!   | ABCC2,AMBIP,APOL1,CLU,FGF19,HNF4A,IL1RN,NR0B2,NR5A2,PCK2,PPARG,SCARB1,SERPINA1                                                                                                                                                         |
| Semaphorin Signaling in Neurons                                               | 2.12          | 0.133  | #NUM!   | FYN,NR1P1,RHOB,RHOD,RHO,RND3,SEMA3A,SEMA7A                                                                                                                                                                                             |
| MSP-RON Signaling In Macrophages Pathway                                      | 2.09          | 0.106  | 1.155   | CREB5,FOS,GAB2,IFNGR2,JUN,KLK10,KLK6,NFKBIZ,PIK3R1,PTGS2,RAP2B,SBNO2                                                                                                                                                                   |
| PDGF Signaling                                                                | 2.09          | 0.116  | 1.897   | CAV1,EIF2AK2,FOS,INPPL1,JUN,PIK3R1,PRKCA,RAP2B,RASA1,SPHK2                                                                                                                                                                             |
| Germ Cell-Sertoli Cell Junction Signaling                                     | 2.08          | 0.0936 | #NUM!   | EPN3,FER,GSN,MAP3K14,PIK3R1,RAP2B,RHOB,RHOD,RHO,RND3,TGFB2,TGFB2,TJP1,TUBA4A,TUBB2A,ZYX                                                                                                                                                |
| Apoptosis Signaling                                                           | 2.07          | 0.11   | -1.667  | BIRC3,CAPN5,CAPN9,CASP7,CASP9,FAS,MAP3K14,MAP4K4,MCL1,PRKCA,RAP2B                                                                                                                                                                      |
| Superpathway of Geranylgeranyldiphosphate Biosynthesis I (via Mevalonate)     | 2.03          | 0.222  | -2      | ACAT1,HMGCR,HMGCS2,IDI1                                                                                                                                                                                                                |
| Wnt/ $\beta$ -catenin Signaling                                               | 2.03          | 0.0925 | -1.291  | ACVR1,AXIN2,CD44,DKK1,DVL1,JUN,MMP7,NR5A2,PPP2R5B,RARG,SOX12,SOX4,TGFB2,TGFB2,UBC,WNT11                                                                                                                                                |
| Regulation Of The Epithelial Mesenchymal Transition By Growth Factors Pathway | 2.03          | 0.0904 | 2       | EGR1,ETS1,FGF19,FGFR2,FOS,GAB1,HMGA2,ID2,JUN,LATS2,PAR6B,PIK3R1,RAP2B,SMAD3,SMURF1,TGFB2,TGFB2                                                                                                                                         |
| Osteoarthritis Pathway                                                        | 2             | 0.0864 | 0.775   | CASP4,CASP7,CASP9,CREB5,CXCL8,DDIT4,DKK1,ELF3,GLI1,GLI2,GLIS2,IL1R2,PPARG,PTGS2,RUNX2,SDC4,SLC39A8,SMAD3,TGFB2                                                                                                                         |
| Prostanoid Biosynthesis                                                       | 1.99          | 0.3    | #NUM!   | CYP2S1,PTGS2,TBXAS1                                                                                                                                                                                                                    |
| GDNF Family Ligand-Receptor Interactions                                      | 1.98          | 0.118  | 1.633   | FOS,GAB1,IRS2,ITPR2,JUN,PDLIM7,PIK3R1,RAP2B,RASA1                                                                                                                                                                                      |
| PPAR $\alpha$ /RXR $\alpha$ Activation                                        | 1.97          | 0.089  | -1.5    | ACAA1,ACVR1,BCL3,GNA14,GPD1,IL1R2,JUN,MAP3K14,MAP4K4,NCOA3,NR0B2,PRKAR2A,PRKCA,RAP2B,SMAD3,TGFB2,TGFB2                                                                                                                                 |
| Regulation of the Epithelial-Mesenchymal Transition Pathway                   | 1.95          | 0.0885 | #NUM!   | DVL1,EGR1,ETS1,FGF19,FGFR2,GAB1,HMGA2,ID2,JAG2,PAR6B,PIK3R1,RAP2B,SMAD3,SMURF1,TGFB2,TGFB2,WNT11                                                                                                                                       |
| PPAR Signaling                                                                | 1.92          | 0.105  | -1.508  | FOS,IL1R2,IL1RN,JUN,MAP3K14,MAP4K4,NR0B2,NR1P1,PPARG,PTGS2,RAP2B                                                                                                                                                                       |
| Melatonin Degradation II                                                      | 1.89          | 0.5    | #NUM!   | MAOA,MAOB                                                                                                                                                                                                                              |
| Acetate Conversion to Acetyl-CoA                                              | 1.89          | 0.5    | #NUM!   | ACSL1,ACSS2                                                                                                                                                                                                                            |
| Integrin Signaling                                                            | 1.84          | 0.0845 | -0.277  | CAPN5,CAPN9,CAV1,FYN,GRB7,GSN,ITGB6,NEDD9,PIK3R1,RAP2B,RHOB,RHOD,RHO,RND3,TNK2,TSPAN4,TSPAN6,ZYX                                                                                                                                       |
| Serotonin Degradation                                                         | 1.84          | 0.119  | 0.707   | ALDH1A1,ALDH1A3,ALDH1B1,ALDH2,ALDH7A1,MAOA,MAOB,UGT1A10 (includes others)                                                                                                                                                              |
| Estrogen Biosynthesis                                                         | 1.84          | 0.143  | 1.342   | AKR1C1/AKR1C2/AKR1C3,CYP1A1,CYP2B6,CYP2S1,CYP3A5                                                                                                                                                                                       |
| CXCR4 Signaling                                                               | 1.83          | 0.0898 | 0       | CXCR4,EGR1,FOS,GNA14,GNAI1,GNAZ,ITPR2,JUN,PIK3R1,PRKCA,RAP2B,RHOB,RHOD,RHO,RND3                                                                                                                                                        |
| Pancreatic Adenocarcinoma Signaling                                           | 1.81          | 0.101  | 0       | CASP9,CDKN2B,E2F7,HBEGF,PIK3R1,PLD1,PLD2,PTGS2,SMAD3,TGFB2,TGFB2                                                                                                                                                                       |
| Endoplasmic Reticulum Stress Pathway                                          | 1.79          | 0.19   | 2       | CASP7,CASP9,DNAJC3,ERN1                                                                                                                                                                                                                |
| Retinol Biosynthesis                                                          | 1.75          | 0.136  | 0.447   | AADAC,AKR1B10,AKR1C3,DHRS3,LIPG,PNPLA2                                                                                                                                                                                                 |
| B Cell Receptor Signaling                                                     | 1.75          | 0.086  | 1.5     | BCL10,BCL6,CARD10,CREB5,DAPP1,EGR1,ETS1,GAB1,GAB2,INPPL1,JUN,MAP3K14,PAG1,PIK3R1,RAP2B,RPS6KB2                                                                                                                                         |
| Protein Kinase A Signaling                                                    | 1.74          | 0.0725 | -1.177  | AKAP12,CDC14B,CDC25A,CNCA1,CREB5,DUSP1,DUSP16,DUSP2,DUSP5,FLNB,GNAI1,H1-0,H1-10,ITPR2,PDE12,PDE8A,PPP1R10,PPP1R1B,PRKAR2A,PRKCA,PTGS2,PTPN21,PTPN9,PTPRB,PTPRH,PYGB,SMAD3,TGFB2,TGFB2                                                  |
| TR/RXR Activation                                                             | 1.72          | 0.107  | #NUM!   | AKR1C1/AKR1C2/AKR1C3,BCL3,KLF9,ME1,NCOA3,PIK3R1,SCARB1,SLC16A3                                                                                                                                                                         |
| Production of Nitric Oxide and Reactive Oxygen Species in Macrophages         | 1.7           | 0.0847 | 1       | APOL1,CLU,FOS,IFNGR2,IRF1,JUN,MAP3K14,PIK3R1,PPP1R10,PPP2R5B,PRKCA,RHOB,RHOD,RHO,RND3,SERPINA1                                                                                                                                         |
| HIPPO signaling                                                               | 1.69          | 0.106  | -1.134  | AJUBA,CD44,LATS2,PPP1R10,PPP2R5B,RASSF6,SMAD3,TEAD2,TJP2                                                                                                                                                                               |
| Protein Citrullination                                                        | 1.68          | 0.4    | #NUM!   | PADI1,PADI2                                                                                                                                                                                                                            |
| Creatine-phosphate Biosynthesis                                               | 1.68          | 0.4    | #NUM!   | CKB,MAP4K4                                                                                                                                                                                                                             |
| Retinoate Biosynthesis I                                                      | 1.66          | 0.147  | -0.447  | AKR1B10,AKR1C3,ALDH1A1,ALDH1A3,DHRS3                                                                                                                                                                                                   |
| PFKFB4 Signaling Pathway                                                      | 1.66          | 0.13   | 0       | CREB5,HK1,NCOA3,PFKM,PRKAR2A,TGFB2                                                                                                                                                                                                     |
| ERK5 Signaling                                                                | 1.66          | 0.111  | 1.414   | CREB5,FOS,FOSL1,GAB1,LIF,RAP2B,RPS6KB2,SGK1                                                                                                                                                                                            |

Table S3: Pathways identification after ATRA+PDT compared to PDT.

| Ingenuity Canonical Pathways                                               | -log(p-value) | Ratio  | z-score | Molecules                                                                                                                                                                                   |
|----------------------------------------------------------------------------|---------------|--------|---------|---------------------------------------------------------------------------------------------------------------------------------------------------------------------------------------------|
| Gloma Invasiveness Signaling                                               | 1.63          | 0.11   | 0       | CD44,F2R,PIK3R1,RAP2B,RHOB,RHOD,RHO,RND3                                                                                                                                                    |
| Role of Tissue Factor in Cancer                                            | 1.63          | 0.0948 | #NUM!   | CCN1,CXCL1,CXCL8,EGR1,F2RL1,FYN,GNA14,HBEGF,PIK3R1,PRKCA,RAP2B                                                                                                                              |
| Agranulocyte Adhesion and Diapedesis                                       | 1.62          | 0.0829 | #NUM!   | CCL15,CLDN1,CLDN12,CLDN2,CXCL1,CXCL16,CXCL2,CXCL3,CXCL8,CXCR4,GNA11,HRH1,IL1RN,MMP15,MMP7,SDC4                                                                                              |
| TWEAK Signaling                                                            | 1.61          | 0.143  | 1.342   | BIRC3,CASP7,CASP9,MAP3K14,TNFRSF12A                                                                                                                                                         |
| Sphingosine-1-phosphate Signaling                                          | 1.6           | 0.094  | -1.265  | ACER2,CASP4,CASP7,CASP9,GNA11,PIK3R1,RHOB,RHOD,RHO,RND3,SMPD3                                                                                                                               |
| HER-2 Signaling in Breast Cancer                                           | 1.6           | 0.0825 | 1.291   | CASP7,CASP9,ELF3,ETS1,FOS,FYN,HBEGF,ITGB6,JUN,PAR6B,PIK3R1,PRKCA,PTGS2,RAP2B,RPS6KB2,SMAD3                                                                                                  |
| Estrogen Receptor Signaling                                                | 1.57          | 0.0732 | -1.043  | ATP5MC1,CAV1,CREB5,FBXO32,FOS,GNA14,GNA11,GNAZ,IGF2,JUN,MDK,MED15,MMP15,MMP7,NCOA3,NR0B2,NR1P1,PIK3R1,PRKAR2A,PRKCA,RAP2B,RPS6KB2,RUNX2,UQCRFS1                                             |
| Role of IL-17A in Psoriasis                                                | 1.57          | 0.214  | #NUM!   | CXCL1,CXCL3,CXCL8                                                                                                                                                                           |
| Acyl-CoA Hydrolysis                                                        | 1.57          | 0.214  | #NUM!   | ACOT11,GNPAT,HNF4A                                                                                                                                                                          |
| Phenylalanine Degradation IV (Mammalian, via Side Chain)                   | 1.57          | 0.214  | #NUM!   | ALDH2,MAOA,MAOB                                                                                                                                                                             |
| IL-17A Signaling in Fibroblasts                                            | 1.56          | 0.139  | #NUM!   | CEBPD,FOS,JUN,LCN2,NFKBIZ                                                                                                                                                                   |
| Cholecystokinin/Gastrin-mediated Signaling                                 | 1.55          | 0.0924 | 1.508   | FOS,IL1RN,ITPR2,JUN,PRKCA,PTGS2,RAP2B,RHOB,RHOD,RHO,RND3                                                                                                                                    |
| Toll-like Receptor Signaling                                               | 1.54          | 0.105  | 1.633   | EIF2AK2,FOS,IL1RN,JUN,MAP3K14,MAP4K4,TRAF4,UBC                                                                                                                                              |
| Regulation of IL-2 Expression in Activated and Anergic T Lymphocytes       | 1.54          | 0.1    | #NUM!   | BCL10,FOS,FYN,JUN,RAP2B,SMAD3,TGFB2,TGFB2,TOB1                                                                                                                                              |
| Bupropion Degradation                                                      | 1.53          | 0.16   | 2       | CYP1A1,CYP2B6,CYP2S1,CYP3A5                                                                                                                                                                 |
| PD-1, PD-L1 cancer immunotherapy pathway                                   | 1.51          | 0.0943 | 0       | B2M,CBLB,HLA-B,HLA-C,HLA-E,IFNGR2,LATS2,PIK3R1,SMAD3,TGFB2                                                                                                                                  |
| Thrombopoietin Signaling                                                   | 1.51          | 0.111  | 1.89    | FOS,GAB2,IRS2,JUN,PIK3R1,PRKCA,RAP2B                                                                                                                                                        |
| T Cell Receptor Signaling                                                  | 1.51          | 0.0943 | #NUM!   | BCL10,FOS,FYN,JUN,PAG1,PIK3R1,PTPRH,RAP2B,RASA1,TKX                                                                                                                                         |
| Myc Mediated Apoptosis Signaling                                           | 1.5           | 0.12   | 0       | BBC3,CASP9,FAS,MCL1,PMIAP1,PRKAR2A                                                                                                                                                          |
| TNFR1 Signaling                                                            | 1.5           | 0.12   | 1.633   | BIRC3,CASP7,CASP9,FOS,JUN,MAP3K14                                                                                                                                                           |
| Tight Junction Signaling                                                   | 1.5           | 0.0833 | #NUM!   | CEBPA,CLDN1,CLDN12,CLDN2,FOS,JUN,PPP2R5B,PRKAR2A,SMURF1,TGFB2,TGFB2,TJP1,TJP2,TJP3                                                                                                          |
| Neuroinflammation Signaling Pathway                                        | 1.49          | 0.0733 | 1.789   | ACVR1,B2M,BACE2,BIRC3,CALB2,CREB5,CXCL8,FAS,FOS,GABRP,GRIN2D,HLA-B,HLA-C,HLA-E,IFNGR2,IRF7,JUN,NOX1,PIK3R1,PTGS2,TGFB2,TGFB2                                                                |
| Choline Biosynthesis III                                                   | 1.49          | 0.2    | #NUM!   | CHPT1,PLD1,PLD2                                                                                                                                                                             |
| PI3K Signaling in B Lymphocytes                                            | 1.47          | 0.087  | 1.265   | ATF3,BCL10,CARD10,DAPP1,FOS,FYN,IRS2,ITPR2,JUN,PIK3R1,PLEKHA2,RAP2B                                                                                                                         |
| IL-17A Signaling in Gastric Cells                                          | 1.47          | 0.154  | 2       | CXCL1,CXCL8,FOS,JUN                                                                                                                                                                         |
| Superpathway of Melatonin Degradation                                      | 1.45          | 0.108  | 1.89    | CYP1A1,CYP2B6,CYP2S1,CYP3A5,MAOA,MAOB,UGT1A10 (includes others)                                                                                                                             |
| Antiproliferative Role of TOB in T Cell Signaling                          | 1.42          | 0.128  | 0.447   | CCNA2,SMAD3,TGFB2,TGFB2,TOB1                                                                                                                                                                |
| Pyridoxal 5'-phosphate Salvage Pathway                                     | 1.42          | 0.106  | 0.816   | CDK6,DAPK1,EIF2AK2,GRK5,PIM1,PKN1,SGK1                                                                                                                                                      |
| Ephrin Receptor Signaling                                                  | 1.41          | 0.0794 | -0.707  | ANGPT1,CREB5,CXCR4,EFNA1,EPHA2,EPHB6,FYN,GNA14,GNA11,GNAZ,GRIN2D,MAP3K14,MAP4K4,RAP2B,RASA1                                                                                                 |
| Extrinsic Prothrombin Activation Pathway                                   | 1.41          | 0.188  | #NUM!   | F5,PROS1,TFPI                                                                                                                                                                               |
| IL-6 Signaling                                                             | 1.4           | 0.0873 | 2.111   | CXCL8,FOS,HSPB1,IL1R2,IL1RN,JUN,MAP3K14,MAP4K4,MCL1,PIK3R1,RAP2B                                                                                                                            |
| Cyclins and Cell Cycle Regulation                                          | 1.39          | 0.0988 | -1.134  | CCNA2,CDC25A,CDK6,CDKN2B,E2F7,HDAC9,PPP2R5B,TGFB2                                                                                                                                           |
| Cell Cycle: G1/S Checkpoint Regulation                                     | 1.39          | 0.104  | 0       | CDC25A,CDK6,CDKN2B,E2F7,HDAC9,SMAD3,TGFB2                                                                                                                                                   |
| Prolactin Signaling                                                        | 1.39          | 0.0988 | 1.134   | FOS,FYN,IRF1,JUN,NMI,PIK3R1,PRKCA,RAP2B                                                                                                                                                     |
| eNOS Signaling                                                             | 1.37          | 0.0818 | -0.707  | AQP5,CASP9,CAV1,CCNA2,CNGA1,HSPA1A/HSPA1B,HSPA1L,HSPA6,ITPR2,NOSTRIN,PIK3R1,PRKAR2A,PRKCA                                                                                                   |
| Regulation Of The Epithelial Mesenchymal Transition In Development Pathway | 1.32          | 0.0952 | -2.121  | AXIN2,DVL1,GLI1,GLI2,GLIS2,JAG2,S100A4,WNT11                                                                                                                                                |
| EGF Signaling                                                              | 1.32          | 0.109  | 0       | FOS,ITPR2,JUN,PIK3R1,PRKCA,RASA1                                                                                                                                                            |
| Sonic Hedgehog Signaling                                                   | 1.32          | 0.138  | 0       | GLI1,GLI2,GLIS2,PRKAR2A                                                                                                                                                                     |
| Sorbitol Degradation I                                                     | 1.32          | 1      | #NUM!   | SORD                                                                                                                                                                                        |
| Lanosterol Biosynthesis                                                    | 1.32          | 1      | #NUM!   | LSS                                                                                                                                                                                         |
| Intrinsic Prothrombin Activation Pathway                                   | 1.31          | 0.119  | 0.447   | COL18A1,F5,KLK10,KLK6,PROS1                                                                                                                                                                 |
| AMPK Signaling                                                             | 1.29          | 0.0751 | -0.277  | AK2,AK4,CCNA2,CFTR,CPT1A,CREB5,HMGR,HNF4A,IRS2,PCK2,PFKM,PHLPP1,PIK3R1,PPP2R5B,PRKAR2A,TBC1D1                                                                                               |
| Neuroprotective Role of THOP1 in Alzheimer's Disease                       | 1.28          | 0.0862 | 0.447   | DPP4,ECE2,HLA-B,HLA-C,HLA-E,KLK10,KLK6,NFYA,PRKAR2A,SERPINA3                                                                                                                                |
| FAT10 Signaling Pathway                                                    | 1.28          | 0.167  | #NUM!   | MAP1LC3B,PSME1,PSME2                                                                                                                                                                        |
| Systemic Lupus Erythematosus In T Cell Signaling Pathway                   | 1.27          | 0.0689 | -1.043  | B2M,BCL6,CASP4,CASP7,CASP9,CD44,CREB5,FAS,FOS,GADD45A,GNA11,HLA-B,HLA-C,HLA-E,JUN,PIK3R1,PPP2R5B,RAP2B,RHOB,RHOD,RHO,RND3,RPS6KB2                                                           |
| BAG2 Signaling Pathway                                                     | 1.27          | 0.116  | 0.447   | HSPA1A/HSPA1B,HSPA1L,HSPA6,PSME1,PSME2                                                                                                                                                      |
| TNFR2 Signaling                                                            | 1.27          | 0.133  | 1       | BIRC3,FOS,JUN,MAP3K14                                                                                                                                                                       |
| Salvage Pathways of Pyrimidine Deoxyribonucleotides                        | 1.27          | 0.25   | #NUM!   | APOBEC3B,TK2                                                                                                                                                                                |
| HMGB1 Signaling                                                            | 1.26          | 0.0788 | 1.732   | CLCF1,CXCL8,FOS,IFNGR2,JUN,LIF,PIK3R1,RAP2B,RHOB,RHOD,RHO,RND3,TGFB2                                                                                                                        |
| IL-12 Signaling and Production in Macrophages                              | 1.26          | 0.0827 | #NUM!   | APOL1,CLU,FOS,IRF1,JUN,PIK3R1,PPARG,PRKCA,REL,SERPINA1,TGFB2                                                                                                                                |
| Triacylglycerol Biosynthesis                                               | 1.23          | 0.114  | -0.447  | DGAT2,ELOVL6,LPCAT1,MBOAT7,PLPP3                                                                                                                                                            |
| Acetone Degradation I (to Methylglyoxal)                                   | 1.23          | 0.129  | 2       | CYP1A1,CYP2B6,CYP2S1,CYP3A5                                                                                                                                                                 |
| Chronic Myeloid Leukemia Signaling                                         | 1.23          | 0.0874 | #NUM!   | CDK6,E2F7,GAB2,HDAC9,PIK3R1,RAP2B,SMAD3,TGFB2,TGFB2                                                                                                                                         |
| Ceramide Signaling                                                         | 1.22          | 0.0909 | 2.449   | CNKSR1,FOS,JUN,PIK3R1,PPP2R5B,RAP2B,SMPD3,SPHK2                                                                                                                                             |
| Methylglyoxal Degradation III                                              | 1.22          | 0.158  | #NUM!   | AKR1B10,AKR1C1,AKR1C2,AKR1C3                                                                                                                                                                |
| Coronavirus Replication Pathway                                            | 1.2           | 0.111  | -1.342  | BAG3,IFITM2,IFITM3,TUBA4A,TUBB2A                                                                                                                                                            |
| Colorectal Cancer Metastasis Signaling                                     | 1.2           | 0.0711 | -0.258  | CASP9,DVL1,FOS,JUN,MMP15,MMP7,PIK3R1,PRKAR2A,PTGS2,RAP2B,RHOB,RHOD,RHO,RND3,SMAD3,TGFB2,TGFB2,WNT11                                                                                         |
| ERK/MAPK Signaling                                                         | 1.2           | 0.0743 | 0       | CREB5,DUSP1,DUSP2,ELF3,ETS1,FOS,FYN,HSPB1,PIK3R1,PPARG,PPP1R10,PPP2R5B,PRKAR2A,PRKCA,RAP2B                                                                                                  |
| HGF Signaling                                                              | 1.2           | 0.0833 | 1.89    | ELF3,ETS1,FOS,GAB1,JUN,MAP3K14,PIK3R1,PRKCA,PTGS2,RAP2B                                                                                                                                     |
| Hepatic Fibrosis / Hepatic Stellate Cell Activation                        | 1.19          | 0.0753 | #NUM!   | COL17A1,COL18A1,CXCL3,CXCL8,EDN1,FAS,FGFR2,IFNGR2,IGF2,IL1R2,KLF6,SMAD3,TGFB2,TGFB2                                                                                                         |
| IL-15 Production                                                           | 1.18          | 0.0826 | 2.53    | CLK1,CLK4,EPHA2,FER,FGFR2,FYN,IRF1,ROR1,TNK2,TKX                                                                                                                                            |
| SPINK1 Pancreatic Cancer Pathway                                           | 1.17          | 0.1    | -0.816  | F2RL1,KLK10,KLK6,SMAD3,SPINK1,TGFB2                                                                                                                                                         |
| PCP pathway                                                                | 1.17          | 0.1    | -0.447  | CELSR1,DVL1,JUN,JUND,LGR4,WNT11                                                                                                                                                             |
| FAT10 Cancer Signaling Pathway                                             | 1.17          | 0.109  | 0.447   | ACVR1,CXCR4,SMAD3,TGFB2,TGFB2                                                                                                                                                               |
| Sirtuin Signaling Pathway                                                  | 1.16          | 0.0687 | 1.069   | ACSS2,ATP5MC1,CPT1A,CXCL8,GADD45A,GADD45B,H1-0,H1-10,HMGCS2,JUN,LDHA,MAP1LC3B,PCK2,PFKM,PPARG,PPIF,TUBA4A,UQCRFS1,VDAC1,XPA                                                                 |
| The Visual Cycle                                                           | 1.16          | 0.15   | #NUM!   | AKR1B10,AKR1C3,DHRS3                                                                                                                                                                        |
| Insulin Receptor Signaling                                                 | 1.15          | 0.0791 | -0.302  | ASIC1,FYN,GAB1,INPL1,IRS2,PIK3R1,PPP1R10,PRKAR2A,RAP2B,RPS6KB2,SGK1                                                                                                                         |
| Induction of Apoptosis by HIV1                                             | 1.15          | 0.0984 | 0       | BBC3,BIRC3,CASP9,CXCR4,FAS,MAP3K14                                                                                                                                                          |
| Tec Kinase Signaling                                                       | 1.13          | 0.0751 | 0       | FAS,FOS,FYN,GNA14,GNA11,GNAZ,PIK3R1,PRKCA,RHOB,RHOD,RHO,RND3,TKX                                                                                                                            |
| ILK Signaling                                                              | 1.13          | 0.0737 | 0.832   | CREB5,FLNB,FOS,IRS2,ITGB6,JUN,LIMS2,PIK3R1,PPP2R5B,PTGS2,RHOB,RHOD,RHO,RND3                                                                                                                 |
| nNOS Signaling in Neurons                                                  | 1.13          | 0.106  | #NUM!   | CAPN5,CAPN9,GRIN2D,PFKM,PRKCA                                                                                                                                                               |
| Gαq Signaling                                                              | 1.12          | 0.0764 | -0.577  | GNA14,HRH1,ITPR2,PIK3R1,PLD1,PLD2,PRKCA,RGS2,RHOB,RHOD,RHO,RND3                                                                                                                             |
| Dopamine Receptor Signaling                                                | 1.12          | 0.0909 | #NUM!   | DDC,MAOA,MAOB,PPP1R10,PPP1R1B,PPP2R5B,PRKAR2A                                                                                                                                               |
| Inhibition of Angiogenesis by TSP1                                         | 1.11          | 0.118  | #NUM!   | FYN,HSPG2,JUN,TGFB2                                                                                                                                                                         |
| T Cell Exhaustion Signaling Pathway                                        | 1.1           | 0.0743 | 0.707   | ACVR1,BCL6,FOS,HLA-B,HLA-C,HLA-E,JUN,LGALS9,PIK3R1,PPP2R5B,RAP2B,SMAD3,TGFB2                                                                                                                |
| Graft-versus-Host Disease Signaling                                        | 1.1           | 0.104  | #NUM!   | FAS,HLA-B,HLA-C,HLA-E,IL1RN                                                                                                                                                                 |
| Calcium Transport I                                                        | 1.1           | 0.2    | #NUM!   | ATP2A3,ATP2B1                                                                                                                                                                               |
| Ferroptosis Signaling Pathway                                              | 1.09          | 0.0794 | 0       | CHAC1,DPP4,EMP1,HMGR,HSPB1,NOX1,RAP2B,SAT1,SLC39A8,STEAP3                                                                                                                                   |
| Leukocyte Extravasation Signaling                                          | 1.09          | 0.0725 | 0       | CD44,CLDN1,CLDN12,CLDN2,CXCR4,FER,GNA11,MMP15,MMP7,NOX1,PIK3R1,PRKCA,RAP1GAP,TKX                                                                                                            |
| Fcγ Receptor-mediated Phagocytosis in Macrophages and Monocytes            | 1.09          | 0.0851 | 0       | FYN,GAB2,PIK3R1,PIP5K1A,PLD1,PLD2,PRKCA,RPS6KB2                                                                                                                                             |
| Cardiac Hypertrophy Signaling (Enhanced)                                   | 1.08          | 0.0624 | 0.73    | ACVR1,ATP2A3,CLCF1,CXCL8,DVL1,EDN1,FGF19,FGFR2,GNA14,GNA11,HDAC9,HSPB1,IL15RA,IL1R2,ITPR2,JUN,LIF,MAP3K14,PDE12,PDE9A,PIK3R1,PKN1,PRKAR2A,PRKCA,PTGS2,RAP2B,RCAN1,RPS6KB2,TGFB2,TGFB2,WNT11 |
| Thyroid Cancer Signaling                                                   | 1.07          | 0.0886 | 1.134   | CXCL8,CXCR4,FOS,IRS2,JUN,PIK3R1,RAP2B                                                                                                                                                       |
| Sertoli Cell-Sertoli Cell Junction Signaling                               | 1.07          | 0.0722 | #NUM!   | CLDN1,CLDN12,CLDN2,EPN3,JUN,MAP3K14,MPP6,PRKAR2A,RAP2B,TJP1,TJP2,TJP3,TUBA4A,TUBB2A                                                                                                         |
| Atherosclerosis Signaling                                                  | 1.07          | 0.0787 | #NUM!   | APOL1,CLU,COL18A1,CXCL8,CXCR4,IL1RN,PLAAT3,PLAAT4,SERPINA1,TNFRSF12A                                                                                                                        |
| Pyrimidine Deoxyribonucleotides De Novo Biosynthesis I                     | 1.06          | 0.136  | #NUM!   | AK4,NME3,NME4                                                                                                                                                                               |
| Corticotropin Releasing Hormone Signaling                                  | 1.05          | 0.0759 | 0       | CREB5,FOS,GLI1,GLI2,GNA11,ITPR2,JUN,JUND,PRKAR2A,PRKCA,PTGS2                                                                                                                                |
| Chemokine Signaling                                                        | 1.05          | 0.0875 | 0.378   | CXCR4,FOS,GNA11,JUN,NOX1,PRKCA,RAP2B                                                                                                                                                        |
| Renal Cell Carcinoma Signaling                                             | 1.05          | 0.0875 | 1.633   | ETS1,FOS,GAB1,JUN,PIK3R1,RAP2B,UBC                                                                                                                                                          |
| Triacylglycerol Degradation                                                | 1.04          | 0.1    | 0.447   | AADAC,ABHD6,FAAH,LIPG,PNPLA2                                                                                                                                                                |
| Amyotrophic Lateral Sclerosis Signaling                                    | 1.03          | 0.0825 | 0       | BIRC3,CAPN5,CAPN9,CASP7,CASP9,GRIN2D,PIK3R1,RNF19A                                                                                                                                          |
| Epoxysqualene Biosynthesis                                                 | 1.03          | 0.5    | #NUM!   | SQLE                                                                                                                                                                                        |
| Spermine Biosynthesis                                                      | 1.03          | 0.5    | #NUM!   | AMD1                                                                                                                                                                                        |

Table S3: Pathways identification after ATRA+PDT compared to PDT.

| Ingenuity Canonical Pathways                                              | -log(p-value) | Ratio  | z-score | Molecules                                                                                              |
|---------------------------------------------------------------------------|---------------|--------|---------|--------------------------------------------------------------------------------------------------------|
| Choline Degradation I                                                     | 1.03          | 0.5    | #NUM!   | ALDH7A1                                                                                                |
| Spermidine Biosynthesis I                                                 | 1.03          | 0.5    | #NUM!   | AMD1                                                                                                   |
| Sulfate Activation for Sulfonation                                        | 1.03          | 0.5    | #NUM!   | PAPSS1                                                                                                 |
| GDP-L-fucose Biosynthesis I (from GDP-D-mannose)                          | 1.03          | 0.5    | #NUM!   | TSTA3                                                                                                  |
| Ketogenesis                                                               | 1.02          | 0.182  | #NUM!   | ACAT1,HMGCS2                                                                                           |
| GDP-glucose Biosynthesis                                                  | 1.02          | 0.182  | #NUM!   | HK1,PGM1                                                                                               |
| Eicosanoid Signaling                                                      | 1.02          | 0.0909 | #NUM!   | AKR1C3,DPEP1,PLAAT3,PLAAT4,PTGS2,TBXAS1                                                                |
| Superpathway of Inositol Phosphate Compounds                              | 1.01          | 0.0704 | 1.604   | CDC25A,DUSP1,DUSP16,DUSP2,DUSP5,INPPL1,ITPKA,PIK3R1,PIP5K1A,PPFIBP2,PPP1R1B,PPP2R5B,PTPRH,RASA1        |
| UVC-Induced MAPK Signaling                                                | 1.01          | 0.098  | 2.236   | FOS,JUN,PRKCA,RAP2B,SMPD3                                                                              |
| Apelin Endothelial Signaling Pathway                                      | 0.996         | 0.0783 | 1       | ANGPT1,FOS,GNAI1,JUN,PIK3R1,PRKCA,RAP2B,RPS6KB2,SMAD3                                                  |
| Signaling by Rho Family GTPases                                           | 0.987         | 0.0672 | 0.535   | CDC42EP1,CDC42EP2,FOS,GNA14,GNAI1,GNAZ,JUN,NOX1,PIK3R1,PIP5K1A,PKN1,PLD1,RHOB,RHOD,RHOA,RND3,STMN1     |
| 3-phosphoinositide Biosynthesis                                           | 0.987         | 0.0723 | 1.155   | CDC25A,DUSP1,DUSP16,DUSP2,DUSP5,PIK3R1,PIP5K1A,PPFIBP2,PPP1R1B,PPP2R5B,PTPRH,RASA1                     |
| Role of Osteoblasts, Osteoclasts and Chondrocytes in Rheumatoid Arthritis | 0.987         | 0.0688 | #NUM!   | BIRC3,BMP4,CASP9,DKK1,DVL1,FOS,GSN,IL1R2,IL1RN,JUN,MAP3K14,PIK3R1,RUNX2,SMURF1,WNT11                   |
| Tumoricidal Function of Hepatic Natural Killer Cells                      | 0.975         | 0.125  | #NUM!   | CASP7,CASP9,FAS                                                                                        |
| Coronavirus Pathogenesis Pathway                                          | 0.971         | 0.0733 | 0.905   | CASP9,CXCL8,E2F7,EEF1A2,FOS,IRF7,JUN,PTGS2,SMAD3,TGFBR2,TRIM25                                         |
| Lymphotoxin $\beta$ Receptor Signaling                                    | 0.963         | 0.0943 | 1.342   | CASP9,CXCL1,MAP3K14,PIK3R1,TRAF4                                                                       |
| Glucose and Glucose-1-phosphate Degradation                               | 0.959         | 0.167  | #NUM!   | HK1,PGM1                                                                                               |
| Glycogen Degradation II                                                   | 0.959         | 0.167  | #NUM!   | PGM1,PYGB                                                                                              |
| SPINK1 General Cancer Pathway                                             | 0.947         | 0.087  | -0.816  | MT1E,MT1X,MT2A,PIK3R1,RAP2B,SPINK1                                                                     |
| p38 MAPK Signaling                                                        | 0.943         | 0.0763 | 0       | CREB5,DUSP1,FAS,HSPB1,IL1R2,IL1RN,RPS6KB2,TGFBR2,TGFBR2                                                |
| Renin-Angiotensin Signaling                                               | 0.943         | 0.0763 | 0.333   | FOS,ITPR2,JUN,NOX1,PIK3R1,PRKAR2A,PRKCA,RAP2B,REN                                                      |
| BMP signaling pathway                                                     | 0.943         | 0.0824 | 0.378   | BMP4,JUN,PRKAR2A,RAP2B,RUNX2,SMURF1,SOSTDC1                                                            |
| Airway Pathology in Chronic Obstructive Pulmonary Disease                 | 0.943         | 0.0763 | #NUM!   | AMBP,CLCF1,CXCL1,CXCL3,CXCL8,FGF19,LCN2,LIF,TGFBR2                                                     |
| IL-17 Signaling                                                           | 0.936         | 0.0695 | 3.051   | CLCF1,CXCL1,CXCL3,CXCL8,FOS,JUN,LCN2,LIF,MAP3K14,PIK3R1,PTGS2,RAP2B,TGFBR2                             |
| Sperm Motility                                                            | 0.924         | 0.0673 | 0.816   | CLK1,CLK4,CNGA1,EPHA2,FER,FGFR2,FYN,ITPR2,PLAAT3,PLAAT4,PRKAR2A,PRKCA,ROR1,TNK2,TXK                    |
| Role of Hypercytokinemia/hyperchemokine in the Pathogenesis of Influenza  | 0.924         | 0.0814 | 2.646   | CXCL3,CXCL8,EIF2AK2,IFIT3,IL1RN,IRF7,OAS3                                                              |
| IL-10 Signaling                                                           | 0.924         | 0.0857 | #NUM!   | FOS,IL1R2,IL1RN,JUN,MAP3K14,MAP4K4                                                                     |
| Role of IL-17A in Arthritis                                               | 0.91          | 0.0909 | #NUM!   | CXCL1,CXCL3,CXCL8,PIK3R1,PTGS2                                                                         |
| Growth Hormone Signaling                                                  | 0.903         | 0.0845 | -0.447  | CEBPA,FOS,IGF2,PIK3R1,PRKCA,RPS6KB2                                                                    |
| Small Cell Lung Cancer Signaling                                          | 0.903         | 0.0845 | 0       | CASP9,CDK6,CDKN2B,PIK3R1,PTGS2,TRAF4                                                                   |
| Estrogen-mediated S-phase Entry                                           | 0.896         | 0.115  | #NUM!   | CCNA2,CDC25A,E2F7                                                                                      |
| Bile Acid Biosynthesis, Neutral Pathway                                   | 0.896         | 0.154  | #NUM!   | AKR1C1,AKR1C2,AKR1C3                                                                                   |
| Apelin Liver Signaling Pathway                                            | 0.896         | 0.115  | #NUM!   | COL18A1,EDN1,FAS                                                                                       |
| Thrombin Signaling                                                        | 0.893         | 0.0673 | 0.577   | F2R,GATA2,GATA6,GNA14,GNAI1,GNAZ,ITPR2,PIK3R1,PRKCA,RAP2B,RHOB,RHOD,RHOA,RND3                          |
| Insulin Secretion Signaling Pathway                                       | 0.889         | 0.0656 | -2      | AGO4,CREB5,EIF4A2,FYN,GNA14,ITPR2,PIK3R1,PRKAR2A,PRKCA,RPS6KB2,SEC11C,SEC61A1,SEC61B,SEC61G,SPCS3,SSR1 |
| Erythropoietin Signaling Pathway                                          | 0.889         | 0.0694 | 0       | BIRC3,CLCF1,CXCL8,FOS,IRS2,ITPR2,JUN,LIF,PIK3R1,PRKCA,RAP2B,TGFBR2                                     |
| GNRH Signaling                                                            | 0.889         | 0.0694 | 1.155   | CREB5,EGR1,FOS,GNA14,GNAI1,HBEGF,ITPR2,JUN,MAP3K14,PRKAR2A,PRKCA,RAP2B                                 |
| Basal Cell Carcinoma Signaling                                            | 0.883         | 0.0833 | -1      | BMP4,DVL1,GLI1,GLI2,GLIS2,WNT11                                                                        |
| 3-phosphoinositide Degradation                                            | 0.883         | 0.0705 | 1.508   | CDC25A,DUSP1,DUSP16,DUSP2,DUSP5,INPPL1,PPFIBP2,PPP1R1B,PPP2R5B,PTPRH,RASA1                             |
| G Beta Gamma Signaling                                                    | 0.879         | 0.0738 | -1      | CAV1,CAV2,GNA14,GNAI1,GNAZ,HBEGF,PRKAR2A,PRKCA,RAP2B                                                   |
| Ovarian Cancer Signaling                                                  | 0.879         | 0.0719 | 0       | CD44,DVL1,EDN1,MMP7,PIK3R1,PRKAR2A,PTGS2,RAP2B,RPS6KB2,WNT11                                           |
| Neuregulin Signaling                                                      | 0.879         | 0.0762 | 0.707   | EREG,ERRF1,GRB7,HBEGF,PIK3R1,PRKCA,RAP2B,RPS6KB2                                                       |
| Acute Myeloid Leukemia Signaling                                          | 0.87          | 0.0787 | -0.816  | CEBPA,KITLG,PIK3R1,PIM1,PML,RAP2B,RPS6KB2                                                              |
| CTLA4 Signaling in Cytotoxic T Lymphocytes                                | 0.87          | 0.0787 | #NUM!   | B2M,FYN,HLA-B,HLA-C,HLA-E,PIK3R1,PPP2R5B                                                               |
| Nicotine Degradation III                                                  | 0.863         | 0.0877 | 2.236   | CYP1A1,CYP2B6,CYP2S1,CYP3A5,UGT1A10 (includes others)                                                  |
| Methylglyoxal Degradation I                                               | 0.863         | 0.333  | #NUM!   | HAGHL                                                                                                  |
| Proline Degradation                                                       | 0.863         | 0.333  | #NUM!   | LOC102724788/PRODH                                                                                     |
| Thiosulfate Disproportionation III (Rhodanese)                            | 0.863         | 0.333  | #NUM!   | TST                                                                                                    |
| Glycerol-3-phosphate Shuttle                                              | 0.863         | 0.333  | #NUM!   | GPD1                                                                                                   |
| Adenine and Adenosine Salvage I                                           | 0.863         | 0.333  | #NUM!   | APRT                                                                                                   |
| S-adenosyl-L-methionine Biosynthesis                                      | 0.863         | 0.333  | #NUM!   | MAT2A                                                                                                  |
| Non-Small Cell Lung Cancer Signaling                                      | 0.86          | 0.0822 | -0.447  | CASP9,CDK6,ITPR2,PIK3R1,PRKCA,RAP2B                                                                    |
| Cdc42 Signaling                                                           | 0.851         | 0.0682 | 1.633   | B2M,CDC42EP2,EXOC8,FGD3,FOS,HLA-B,HLA-C,HLA-E,IQGAP2,JUN,RASA1,TNK2                                    |
| Glycogen Degradation III                                                  | 0.845         | 0.143  | #NUM!   | PGM1,PYGB                                                                                              |
| Urate Biosynthesis/Inosine 5'-phosphate Degradation                       | 0.845         | 0.143  | #NUM!   | IMPDH1,NT5E                                                                                            |
| Regulation of Cellular Mechanics by Calpain Protease                      | 0.842         | 0.0811 | 0       | CAPN5,CAPN9,CCNA2,CDK6,CNGA1,RAP2B                                                                     |
| D-myo-inositol (1,4,5,6)-Tetrakisphosphate Biosynthesis                   | 0.839         | 0.0704 | 1.265   | CDC25A,DUSP1,DUSP16,DUSP2,DUSP5,PPFIBP2,PPP1R1B,PPP2R5B,PTPRH,RASA1                                    |
| D-myo-inositol (3,4,5,6)-tetrakisphosphate Biosynthesis                   | 0.839         | 0.0704 | 1.265   | CDC25A,DUSP1,DUSP16,DUSP2,DUSP5,PPFIBP2,PPP1R1B,PPP2R5B,PTPRH,RASA1                                    |
| Cancer Drug Resistance By Drug Efflux                                     | 0.839         | 0.0862 | #NUM!   | ABCC1,ABCC2,PIK3R1,PTGS2,RAP2B                                                                         |
| CDK5 Signaling                                                            | 0.83          | 0.0741 | 0.707   | EGR1,FOSB,LAMA5,PPP1R10,PPP1R1B,PPP2R5B,PRKAR2A,RAP2B                                                  |
| Serotonin Receptor Signaling                                              | 0.824         | 0.093  | #NUM!   | DDC,HTR1D,MAOA,MAOB                                                                                    |
| Angiotensin Signaling                                                     | 0.821         | 0.08   | 1       | ANGPT1,CASP9,GRB7,PIK3R1,RAP2B,RASA1                                                                   |
| Estrogen-Dependent Breast Cancer Signaling                                | 0.821         | 0.08   | 1.342   | AKR1C1,AKR1C2,CREB5,FOS,JUN,PIK3R1,RAP2B                                                               |
| Role of MAPK Signaling in Inhibiting the Pathogenesis of Influenza        | 0.821         | 0.08   | 2.449   | CXCL8,EIF2AK2,JUN,PLAAT3,PLAAT4,PTGS2                                                                  |
| IL-1 Signaling                                                            | 0.815         | 0.0761 | 1       | FOS,GNA14,GNAI1,GNAZ,JUN,MAP3K14,PRKAR2A                                                               |
| NF- $\kappa$ B Signaling                                                  | 0.815         | 0.067  | 1.155   | BCL10,BMP4,CARD10,EIF2AK2,FGFR2,IL1R2,IL1RN,MAP3K14,MAP4K4,PIK3R1,RAP2B,TGFBR2                         |
| Neurotrophin/TRK Signaling                                                | 0.804         | 0.0789 | 1.633   | CREB5,FOS,GAB1,JUN,PIK3R1,RAP2B                                                                        |
| Melatonin Degradation I                                                   | 0.796         | 0.0833 | 2.236   | CYP1A1,CYP2B6,CYP2S1,CYP3A5,UGT1A10 (includes others)                                                  |
| Superpathway of Citrulline Metabolism                                     | 0.796         | 0.133  | #NUM!   | ASS1,LOC102724788/PRODH                                                                                |
| Dopamine-DARPP32 Feedback in cAMP Signaling                               | 0.793         | 0.0675 | 0.632   | ATP2A3,CAMKK1,CREB5,GNAI1,GRIN2D,ITPR2,PPP1R10,PPP1R1B,PPP2R5B,PRKAR2A,PRKCA                           |
| Role of NFAT in Regulation of the Immune Response                         | 0.79          | 0.0663 | -0.905  | FOS,FYN,GNA14,GNAI1,GNAZ,HLA-B,ITPR2,JUN,PIK3R1,RAP2B,RCAN1,RCAN3                                      |
| Type I Diabetes Mellitus Signaling                                        | 0.785         | 0.0721 | 1.342   | CASP9,FAS,HLA-B,HLA-C,HLA-E,IFNGR2,IRF1,MAP3K14                                                        |
| ErbB Signaling                                                            | 0.783         | 0.0745 | 1.89    | EREG,FOS,HBEGF,JUN,PIK3R1,PRKCA,RAP2B                                                                  |
| iNOS Signaling                                                            | 0.775         | 0.0889 | #NUM!   | FOS,IFNGR2,IRF1,JUN                                                                                    |
| Glioblastoma Multiforme Signaling                                         | 0.77          | 0.0667 | -1      | CDK6,E2F7,IGF2,ITPR2,PIK3R1,RAP2B,RHOB,RHOD,RHOA,RND3,WNT11                                            |
| IL-7 Signaling Pathway                                                    | 0.767         | 0.0769 | -1      | BCL6,CDC25A,FYN,JUN,MCL1,PIK3R1                                                                        |
| PI3K/AKT Signaling                                                        | 0.757         | 0.0652 | 0       | GAB1,GAB2,GDF15,IL15RA,IL1R2,INPPL1,MCL1,PIK3R1,PPP2R5B,PTGS2,RAP2B,RPS6KB2                            |
| IL-3 Signaling                                                            | 0.75          | 0.0759 | 1.633   | FOS,GAB2,JUN,PIK3R1,PRKCA,RAP2B                                                                        |
| Communication between Innate and Adaptive Immune Cells                    | 0.75          | 0.0729 | #NUM!   | B2M,CCL15,CXCL8,HLA-B,HLA-C,HLA-E,IL1RN                                                                |
| Glutaryl-CoA Degradation                                                  | 0.75          | 0.125  | #NUM!   | ACAT1,CYP2S1                                                                                           |
| Androgen Biosynthesis                                                     | 0.75          | 0.125  | #NUM!   | AKR1C3,SRD5A3                                                                                          |
| Spermine and Spermidine Degradation I                                     | 0.747         | 0.25   | #NUM!   | SAT1                                                                                                   |
| Catecholamine Biosynthesis                                                | 0.747         | 0.25   | #NUM!   | DDC                                                                                                    |
| Phenylethylamine Degradation I                                            | 0.747         | 0.25   | #NUM!   | ALDH2                                                                                                  |
| Cardiac Hypertrophy Signaling                                             | 0.745         | 0.0625 | 0.535   | GNA14,GNAI1,GNAZ,HSPB1,JUN,MAP3K14,PIK3R1,PRKAR2A,RAP2B,RHOB,RHOD,RHOA,RND3,TGFBR2,TGFBR2              |
| NGF Signaling                                                             | 0.74          | 0.0702 | 1.134   | CREB5,GAB1,MAP3K14,PIK3R1,RAP2B,RPS6KB2,SMPD3,TRAF4                                                    |
| Ephrin A Signaling                                                        | 0.726         | 0.0851 | #NUM!   | EFNA1,EPHA2,FYN,PIK3R1                                                                                 |
| Phagosome Maturation                                                      | 0.721         | 0.0662 | #NUM!   | ATP6V1B1,B2M,CTSE,CTSS,HLA-B,HLA-C,HLA-E,NOX1,TUBA4A,TUBB2A                                            |
| MSP-RON Signaling In Cancer Cells Pathway                                 | 0.71          | 0.0672 | 2.333   | CREB5,ELF3,ETS1,FOS,JUN,KLK10,KLK6,PIK3R1,RAP2B                                                        |
| Mitochondrial L-carnitine Shuttle Pathway                                 | 0.71          | 0.118  | #NUM!   | ACSL1,CPT1A                                                                                            |
| Epithelial Adherens Junction Signaling                                    | 0.71          | 0.0658 | #NUM!   | ACVR1,EPN3,FER,LMO7,RAP2B,TGFBR2,TGFBR2,TUBA4A,TUBB2A,ZYX                                              |
| Adipogenesis pathway                                                      | 0.71          | 0.0672 | #NUM!   | BMP4,CEBPA,CEBPD,FGFR2,HDAC9,NR1D2,PPARG,SMAD3,TXNIP                                                   |

Table S3: Pathways identification after ATRA+PDT compared to PDT.

| Ingenuity Canonical Pathways                                                            | -log(p-value) | Ratio  | z-score | Molecules                                                                                        |
|-----------------------------------------------------------------------------------------|---------------|--------|---------|--------------------------------------------------------------------------------------------------|
| Airway Inflammation in Asthma                                                           | 0.706         | 0.0938 | #NUM!   | CXCL8,IFNGR2,TGFB2                                                                               |
| PDF Signaling                                                                           | 0.699         | 0.0732 | 0.816   | CASP7,FAS,PIK3R1,PNPLA2,PPARG,RAP2B                                                              |
| Mitochondrial Dysfunction                                                               | 0.699         | 0.0643 | #NUM!   | ACO1,ATP5MC1,ATP5MC3,BACE2,CASP9,CPT1A,DHODH,MAOA,MAOB,UQCERS1,VDAC1                             |
| CD40 Signaling                                                                          | 0.697         | 0.0769 | 1       | FOS,JUN,MAP3K14,PIK3R1,PTGS2                                                                     |
| Phospholipases                                                                          | 0.697         | 0.0769 | 1.342   | LIPG,PLAAT3,PLAAT4,PLD1,PLD2                                                                     |
| Nicotine Degradation II                                                                 | 0.697         | 0.0769 | 2.236   | CYP1A1,CYP2B6,CYP2S1,CYP3A5,UGT1A10 (includes others)                                            |
| Human Embryonic Stem Cell Pluripotency                                                  | 0.697         | 0.0667 | #NUM!   | ACVR1,BMP4,DVL1,FGFR2,PIK3R1,SMAD3,TGFB2,TGFBR2,WNT11                                            |
| Role of Pattern Recognition Receptors in Recognition of Bacteria and Viruses            | 0.686         | 0.0649 | 1.342   | CLCF1,CXCL8,EIF2AK2,IFIH1,IRF7,LIF,OAS3,PIK3R1,PRKCA,TGFB2                                       |
| Androgen Signaling                                                                      | 0.684         | 0.0662 | 0       | DNAJB1,GNA14,GNAI1,GNAZ,JUN,POLR2L,PRKAR2A,PRKCA,SMAD3                                           |
| LPS-stimulated MAPK Signaling                                                           | 0.682         | 0.0723 | 1.633   | FOS,JUN,MAP3K14,PIK3R1,PRKCA,RAP2B                                                               |
| Autoimmune Thyroid Disease Signaling                                                    | 0.682         | 0.0816 | #NUM!   | FAS,HLA-B,HLA-C,HLA-E                                                                            |
| mTOR Signaling                                                                          | 0.678         | 0.0619 | -0.302  | DDIT4,EIF4A2,PIK3R1,PLD1,PLD2,PPP2R5B,PRKCA,RAP2B,RHOB,RHOD,RHOU,RND3,RPS6KB2                    |
| Circadian Rhythm Signaling                                                              | 0.678         | 0.0909 | #NUM!   | CREB5,GRIN2D,NR1D1                                                                               |
| IL-9 Signaling                                                                          | 0.678         | 0.0909 | #NUM!   | BCL3,IRS2,PIK3R1                                                                                 |
| Pyrimidine Ribonucleotides Interconversion                                              | 0.678         | 0.0909 | #NUM!   | AK4,NME3,NME4                                                                                    |
| Role of NANOG in Mammalian Embryonic Stem Cell Pluripotency                             | 0.672         | 0.0672 | 1       | BMP4,DVL1,GAB1,GATA6,LIF,PIK3R1,RAP2B,WNT11                                                      |
| 1D-myo-inositol Hexakisphosphate Biosynthesis II (Mammalian)                            | 0.672         | 0.111  | #NUM!   | INPPL1,ITPKA                                                                                     |
| D-myo-inositol (1,3,4)-trisphosphate Biosynthesis                                       | 0.672         | 0.111  | #NUM!   | INPPL1,ITPKA                                                                                     |
| Iron homeostasis signaling pathway                                                      | 0.672         | 0.0657 | #NUM!   | ABCB10,ACO1,ATP6V1B1,BMP4,CIAO3,GDF15,HEPH,SMAD3,STEAP3                                          |
| FGF Signaling                                                                           | 0.666         | 0.0714 | 1.633   | CREB5,FGF19,FGFR2,GAB1,PIK3R1,PRKCA                                                              |
| Serine Biosynthesis                                                                     | 0.662         | 0.2    | #NUM!   | PSPH                                                                                             |
| CMP-N-acetylneuraminate Biosynthesis I (Eukaryotes)                                     | 0.662         | 0.2    | #NUM!   | GNE                                                                                              |
| Lysine Degradation II                                                                   | 0.662         | 0.2    | #NUM!   | ALDH7A1                                                                                          |
| Lysine Degradation V                                                                    | 0.662         | 0.2    | #NUM!   | ALDH7A1                                                                                          |
| Trans, trans-farnesyl Diphosphate Biosynthesis                                          | 0.662         | 0.2    | #NUM!   | IDI1                                                                                             |
| Citrulline-Nitric Oxide Cycle                                                           | 0.662         | 0.2    | #NUM!   | ASS1                                                                                             |
| Galactose Degradation I (Leloir Pathway)                                                | 0.662         | 0.2    | #NUM!   | GALM                                                                                             |
| Tyrosine Degradation I                                                                  | 0.662         | 0.2    | #NUM!   | HGD                                                                                              |
| Amyloid Processing                                                                      | 0.662         | 0.08   | #NUM!   | BACE2,CAPN5,CAPN9,PRKAR2A                                                                        |
| D-myo-inositol-5-phosphate Metabolism                                                   | 0.652         | 0.0637 | 1.265   | CDC25A,DUSP1,DUSP16,DUSP2,DUSP5,PPFIBP2,PPP1R1B,PPP2R5B,PTPRH,RASA1                              |
| Semaphorin Neuronal Repulsive Signaling Pathway                                         | 0.65          | 0.0647 | -0.333  | CD44,CSPG4,FYN,NRP1,PIK3R1,PLXND1,PRKAR2A,SEMA3A,SEMA3E                                          |
| Rac Signaling                                                                           | 0.648         | 0.0661 | -0.707  | CD44,IQGAP2,JUN,NOX1,PIK3R1,PIP5K1A,PLD1,RAP2B                                                   |
| LXR/RXR Activation                                                                      | 0.648         | 0.0661 | -0.378  | AMBP,APOL1,CLU,HMGCR,IL1R2,IL1RN,PTGS2,SERPINA1                                                  |
| Hereditary Breast Cancer Signaling                                                      | 0.636         | 0.0643 | #NUM!   | CDK6,FANCF,GADD45A,GADD45B,HDAC9,PIK3R1,POLR2L,RAP2B,UBC                                         |
| Granzyme A Signaling                                                                    | 0.636         | 0.105  | #NUM!   | H1-0,H1-10                                                                                       |
| GADD45 Signaling                                                                        | 0.636         | 0.105  | #NUM!   | GADD45A,GADD45B                                                                                  |
| Purine Nucleotides Degradation II (Aerobic)                                             | 0.636         | 0.105  | #NUM!   | IMPDH1,NT5E                                                                                      |
| Inhibition of ARE-Mediated mRNA Degradation Pathway                                     | 0.635         | 0.0656 | -1.414  | AGO4,PPP2R5B,PRKAR2A,PSME1,PSME2,TIA1,ZFP36,ZFP36L1                                              |
| Pyrimidine Ribonucleotides De Novo Biosynthesis                                         | 0.629         | 0.0857 | #NUM!   | AK4,NME3,NME4                                                                                    |
| Natural Killer Cell Signaling                                                           | 0.623         | 0.0609 | 0       | B2M,COL18A1,FYN,HLA-B,HLA-C,HLA-E,HSPA1A/HSPA1B,HSPA1L,HSPA6,MAP3K14,PIK3R1,RAP2B                |
| RhoA Signaling                                                                          | 0.622         | 0.065  | 0.378   | CDC42EP1,CDC42EP2,PIP5K1A,PKN1,PLD1,PLEKHG5,RND3,RTKN                                            |
| UVB-Induced MAPK Signaling                                                              | 0.622         | 0.0769 | 1       | FOS,JUN,PIK3R1,PRKCA                                                                             |
| Gap Junction Signaling                                                                  | 0.613         | 0.0606 | #NUM!   | CAV1,GJB2,GNAI1,ITPR2,PIK3R1,PRKAR2A,PRKCA,RAP2B,TJP1,TJP2,TUBA4A,TUBB2A                         |
| G-Protein Coupled Receptor Signaling                                                    | 0.611         | 0.0584 | #NUM!   | CREB5,DUSP1,FYN,GNA14,GNAI1,HRH1,HTR1D,PDE12,PDE9A,PIK3R1,PRKAR2A,PRKCA,RAP1GAP,RAP2B,RASA1,RGS2 |
| Xenobiotic Metabolism General Signaling Pathway                                         | 0.604         | 0.0629 | -0.333  | ABCA2,GSTA4,MAP3K14,NQO2,PIK3R1,PRKCA,RAP2B,UGT1A10 (includes others),UGT8                       |
| Endocannabinoid Cancer Inhibition Pathway                                               | 0.604         | 0.0629 | 1.667   | ATF3,CASP4,CASP7,CASP9,CREB5,GNAI1,PIK3R1,PRKAR2A,SMPD3                                          |
| CD27 Signaling in Lymphocytes                                                           | 0.604         | 0.0755 | #NUM!   | CASP9,FOS,JUN,MAP3K14                                                                            |
| GP6 Signaling Pathway                                                                   | 0.599         | 0.064  | -0.707  | COL17A1,COL18A1,FYN,LAMA5,LAMC2,NOX1,PIK3R1,PRKCA                                                |
| RANK Signaling in Osteoclasts                                                           | 0.593         | 0.0674 | 0.816   | BIRC3,FOS,GSN,JUN,MAP3K14,PIK3R1                                                                 |
| Arginine Biosynthesis IV                                                                | 0.592         | 0.167  | #NUM!   | ASS1                                                                                             |
| Pyruvate Fermentation to Lactate                                                        | 0.592         | 0.167  | #NUM!   | LDHA                                                                                             |
| Urea Cycle                                                                              | 0.592         | 0.167  | #NUM!   | ASS1                                                                                             |
| Chondroitin and Dermatan Biosynthesis                                                   | 0.592         | 0.167  | #NUM!   | CHPF                                                                                             |
| Ceramide Biosynthesis                                                                   | 0.592         | 0.167  | #NUM!   | DEGS2                                                                                            |
| Serotonin and Melatonin Biosynthesis                                                    | 0.592         | 0.167  | #NUM!   | DDC                                                                                              |
| Glycerol Degradation I                                                                  | 0.592         | 0.167  | #NUM!   | GPD1                                                                                             |
| Ceramide Degradation                                                                    | 0.592         | 0.167  | #NUM!   | ACER2                                                                                            |
| Zymosterol Biosynthesis                                                                 | 0.592         | 0.167  | #NUM!   | MSMO1                                                                                            |
| Glycogen Biosynthesis II (from UDP-D-Glucose)                                           | 0.592         | 0.167  | #NUM!   | GYG1                                                                                             |
| Cell Cycle Regulation by BTG Family Proteins                                            | 0.583         | 0.0811 | #NUM!   | BTG1,E2F7,PPP2R5B                                                                                |
| Ephrin B Signaling                                                                      | 0.58          | 0.0694 | -2.236  | CXCR4,EPHB6,GNA14,GNAI1,GNAZ                                                                     |
| P2Y Purigenic Receptor Signaling Pathway                                                | 0.575         | 0.063  | 1.414   | CREB5,FOS,GNAI1,JUN,PIK3R1,PRKAR2A,PRKCA,RAP2B                                                   |
| Docosahexaenoic Acid (DHA) Signaling                                                    | 0.562         | 0.0789 | #NUM!   | CASP9,PIK3R1,PNPLA2                                                                              |
| Glioma Signaling                                                                        | 0.558         | 0.0636 | 0       | CDK6,CDKN2B,E2F7,IGF2,PIK3R1,PRKCA,RAP2B                                                         |
| Role of MAPK Signaling in Promoting the Pathogenesis of Influenza                       | 0.558         | 0.0636 | 1.89    | ATP6V1B1,JUN,PLAAT3,PLAAT4,PRKCA,PTGS2,RAP2B                                                     |
| Synaptic Long Term Potentiation                                                         | 0.554         | 0.062  | 0       | CREB5,GNA14,GRIN2D,ITPR2,PPP1R10,PRKAR2A,PRKCA,RAP2B                                             |
| p70S6K Signaling                                                                        | 0.554         | 0.062  | 0       | F2R,F2RL1,GNAI1,PIK3R1,PLD1,PPP2R5B,PRKCA,RAP2B                                                  |
| CDP-diaclyglycerol Biosynthesis I                                                       | 0.545         | 0.0909 | #NUM!   | LPCAT1,MBOAT7                                                                                    |
| Inhibition of Matrix Metalloproteases                                                   | 0.541         | 0.0769 | #NUM!   | HSPG2,MMP15,MMP7                                                                                 |
| IL-15 Signaling                                                                         | 0.536         | 0.0667 | 0.447   | CXCL8,IL15RA,PIK3R1,RAP2B,RPS6KB2                                                                |
| Trehalose Degradation II (Trehalase)                                                    | 0.536         | 0.143  | #NUM!   | HK1                                                                                              |
| Superpathway of Serine and Glycine Biosynthesis I                                       | 0.536         | 0.143  | #NUM!   | PSPH                                                                                             |
| Phosphatidylcholine Biosynthesis I                                                      | 0.536         | 0.143  | #NUM!   | CHPT1                                                                                            |
| Factors Promoting Cardiogenesis in Vertebrates                                          | 0.532         | 0.06   | -0.333  | ACVR1,BMP4,CREB5,DKK1,DVL1,PRKCA,TGFB2,TGFBR2,WNT11                                              |
| Melanocyte Development and Pigmentation Signaling                                       | 0.527         | 0.0638 | -0.816  | CREB5,KITLG,PIK3R1,PRKAR2A,RAP2B,RPS6KB2                                                         |
| RhoGDI Signaling                                                                        | 0.524         | 0.0582 | 0       | ARHGDI1B,CD44,GNA14,GNAI1,GNAZ,PIP5K1A,PRKCA,RHOB,RHOD,RHOU,RND3                                 |
| Opioid Signaling Pathway                                                                | 0.524         | 0.0567 | 0.277   | CREB5,FOS,FOSB,FYN,GNAI1,GRIN2D,GRK5,ITPR2,PLD2,PRKAR2A,PRKCA,RAP2B,RPS6KB2,SIGMAR1              |
| Relaxin Signaling                                                                       | 0.521         | 0.0596 | 0       | FOS,GNA14,GNAI1,GNAZ,JUN,PDE12,PDE9A,PIK3R1,PRKAR2A                                              |
| NF-κB Activation by Viruses                                                             | 0.521         | 0.0658 | 1.342   | EIF2AK2,MAP3K14,PIK3R1,PRKCA,RAP2B                                                               |
| April Mediated Signaling                                                                | 0.521         | 0.075  | #NUM!   | FOS,JUN,MAP3K14                                                                                  |
| Differential Regulation of Cytokine Production in Intestinal Epithelial Cells by IL-17A | 0.519         | 0.087  | #NUM!   | CXCL1,LCN2                                                                                       |
| Superpathway of D-myo-inositol (1,4,5)-trisphosphate Metabolism                         | 0.519         | 0.087  | #NUM!   | INPPL1,ITPKA                                                                                     |
| Tryptophan Degradation III (Eukaryotic)                                                 | 0.519         | 0.087  | #NUM!   | ACAT1,CYP2S1                                                                                     |
| α-Adrenergic Signaling                                                                  | 0.516         | 0.0632 | -0.447  | GNAI1,ITPR2,PRKAR2A,PRKCA,PYGB,RAP2B                                                             |
| Th1 and Th2 Activation Pathway                                                          | 0.514         | 0.0585 | #NUM!   | ACVR1,CXCR4,HLA-B,IFNGR2,IRF1,JAG2,JUN,LGALS9,PIK3R1,TGFBR2                                      |
| B Cell Activating Factor Signaling                                                      | 0.503         | 0.0732 | #NUM!   | FOS,JUN,MAP3K14                                                                                  |
| Phosphatidylglycerol Biosynthesis II (Non-plastidic)                                    | 0.493         | 0.0833 | #NUM!   | LPCAT1,MBOAT7                                                                                    |
| TCA Cycle II (Eukaryotic)                                                               | 0.493         | 0.0833 | #NUM!   | ACO1,SUCLA2                                                                                      |
| ATM Signaling                                                                           | 0.492         | 0.0619 | 0       | CDC25A,CREB5,GADD45A,GADD45B,JUN,PPP2R5B                                                         |
| STAT3 Pathway                                                                           | 0.492         | 0.0593 | 0.447   | CDC25A,FGFR2,IL15RA,IL1R2,PIM1,RAP2B,TGFB2,TGFBR2                                                |
| Bladder Cancer Signaling                                                                | 0.492         | 0.0619 | #NUM!   | CXCL8,DAPK1,FGF19,MMP15,MMP7,RAP2B                                                               |
| Maturity Onset Diabetes of Young (MODY) Signaling                                       | 0.488         | 0.0667 | #NUM!   | APOL1,APOL2,APOL6,HNF4A                                                                          |

Table S3: Pathways identification after ATRA+PDT compared to PDT.

| Ingenuity Canonical Pathways                                                    | -log(p-value) | Ratio  | z-score | Molecules                                                                                                                                                                                        |
|---------------------------------------------------------------------------------|---------------|--------|---------|--------------------------------------------------------------------------------------------------------------------------------------------------------------------------------------------------|
| Sphingosine and Sphingosine-1-phosphate Metabolism                              | 0.488         | 0.125  | #NUM!   | ACER2                                                                                                                                                                                            |
| Sphingomyelin Metabolism                                                        | 0.488         | 0.125  | #NUM!   | SMPD3                                                                                                                                                                                            |
| Breast Cancer Regulation by Stathmin1                                           | 0.485         | 0.0525 | 3.772   | ADGRF1,ADGRG5,AURKA,CDK6,CELSR1,CREB5,E2F7,F2R,F2RL1,GPR158,GPR160,GPR35,GPR87,GPRC5A,HCAR1,HRH1,HTR1D,JUN,LGR4,NMUR2,PIK3R1,PPP1R10,PPP2R5B,PRKAR2A,PRKCA,RAP2B,SPDEF,STMN1,TGFB2,TUBA4A,TUBB2A |
| MIF Regulation of Innate Immunity                                               | 0.484         | 0.0714 | #NUM!   | FOS,JUN,PTGS2                                                                                                                                                                                    |
| BEX2 Signaling Pathway                                                          | 0.483         | 0.0633 | -0.447  | BBC3,ITGB6,JUN,PPP2R5B,SWAP70                                                                                                                                                                    |
| Role of NFAT in Cardiac Hypertrophy                                             | 0.479         | 0.0561 | -0.302  | GNAI1,HDAC9,ITPR2,LIF,PIK3R1,PRKAR2A,PRKCA,RAP2B,RCAN1,RCAN3,TGFB2,TGFB2R2                                                                                                                       |
| IL-2 Signaling                                                                  | 0.474         | 0.0656 | #NUM!   | FOS,JUN,PIK3R1,RAP2B                                                                                                                                                                             |
| Nitric Oxide Signaling in the Cardiovascular System                             | 0.47          | 0.0606 | 0       | ATP2A3,CAV1,ITPR2,PIK3R1,PRKAR2A,PRKCA                                                                                                                                                           |
| Role of MAPK Signaling in the Pathogenesis of Influenza                         | 0.47          | 0.0625 | #NUM!   | PLAAT3,PLAAT4,PRKCA,PTGS2,RAP2B                                                                                                                                                                  |
| Role of Macrophages, Fibroblasts and Endothelial Cells in Rheumatoid Arthritis  | 0.469         | 0.0541 | #NUM!   | CEBPA,CEBPD,CREB5,CXCL8,DKK1,DVL1,F2RL1,FOS,IL1R2,IL1RN,JUN,MAP3K14,PIK3R1,PRKCA,RAP2B,TRAF4,WNT11                                                                                               |
| Necroptosis Signaling Pathway                                                   | 0.467         | 0.0573 | -0.333  | BIRC3,CAPN5,CAPN9,DAPK1,EIF2AK2,FAS,PP1F,UBC,VDAC1                                                                                                                                               |
| Role of IL-17F in Allergic Inflammatory Airway Diseases                         | 0.467         | 0.0698 | #NUM!   | CREB5,CXCL1,CXCL8                                                                                                                                                                                |
| Wnt/Ca+ pathway                                                                 | 0.46          | 0.0645 | 1       | CREB5,DVL1,PRKCA,ROR1                                                                                                                                                                            |
| Actin Nucleation by ARP-WASP Complex                                            | 0.458         | 0.0617 | 0.447   | RAP2B,RHOB,RHOD,RHO, RND3                                                                                                                                                                        |
| Role of RIG1-like Receptors in Antiviral Innate Immunity                        | 0.451         | 0.0682 | #NUM!   | IFIH1,IRF7,TRIM25                                                                                                                                                                                |
| Apelin Pancreas Signaling Pathway                                               | 0.451         | 0.0682 | #NUM!   | ERN1,PIK3R1,PRKAR2A                                                                                                                                                                              |
| Neuropathic Pain Signaling In Dorsal Horn Neurons                               | 0.449         | 0.0594 | 0       | FOS,GRIN2D,ITPR2,PIK3R1,PRKAR2A,PRKCA                                                                                                                                                            |
| Sucrose Degradation V (Mammalian)                                               | 0.446         | 0.111  | #NUM!   | GALM                                                                                                                                                                                             |
| Citrulline Biosynthesis                                                         | 0.446         | 0.111  | #NUM!   | LOC102724788/PRODH                                                                                                                                                                               |
| CD28 Signaling in T Helper Cells                                                | 0.441         | 0.0579 | 0       | BCL10,FOS,FYN,HLA-B,ITPR2,JUN,PIK3R1                                                                                                                                                             |
| Acute Phase Response Signaling                                                  | 0.439         | 0.0556 | 2.333   | AMBIP,CRABP2,FOS,IL1RN,JUN,MAP3K14,PIK3R1,RAP2B,SERPINA1,SERPINA3                                                                                                                                |
| SAPK/JNK Signaling                                                              | 0.438         | 0.0588 | 0.816   | GAB1,GADD45A,JUN,MAP4K4,PIK3R1,RAP2B                                                                                                                                                             |
| Role of PI3K/AKT Signaling in the Pathogenesis of Influenza                     | 0.433         | 0.0625 | #NUM!   | CASP9,GNAI1,PIK3R1,PLAC8                                                                                                                                                                         |
| Cardiac $\beta$ -adrenergic Signaling                                           | 0.428         | 0.0563 | -1.134  | AKAP12,ATP2A3,PDE12,PDE9A,PKIB,PPP1R10,PPP2R5B,PRKAR2A                                                                                                                                           |
| Mouse Embryonic Stem Cell Pluripotency                                          | 0.427         | 0.0583 | -0.816  | BMP4,DVL1,ID2,LIF,PIK3R1,RAP2B                                                                                                                                                                   |
| Regulation of Actin-based Motility by Rho                                       | 0.427         | 0.0583 | 0.447   | GSN,PIPSK1A,RHOB,RHOD,RHO, RND3                                                                                                                                                                  |
| VEGF Family Ligand-Receptor Interactions                                        | 0.424         | 0.0595 | 1       | FOS,NRP1,PIK3R1,PRKCA,RAP2B                                                                                                                                                                      |
| IL-4 Signaling                                                                  | 0.412         | 0.0588 | #NUM!   | HLA-B,INPPL1,PIK3R1,RAP2B,RPS6KB2                                                                                                                                                                |
| Ketolysis                                                                       | 0.41          | 0.1    | #NUM!   | ACAT1                                                                                                                                                                                            |
| Dendritic Cell Maturation                                                       | 0.409         | 0.0543 | 1       | B2M,CD58,CD18A1,CREB5,HLA-B,HLA-C,HLA-E,IL1RN,MAP3K14,PIK3R1                                                                                                                                     |
| Calcium-induced T Lymphocyte Apoptosis                                          | 0.408         | 0.0606 | 0       | ATP2A3,HLA-B,ITPR2,PRKCA                                                                                                                                                                         |
| Allograft Rejection Signaling                                                   | 0.401         | 0.0581 | #NUM!   | B2M,FAS,HLA-B,HLA-C,HLA-E                                                                                                                                                                        |
| Calcium Signaling                                                               | 0.396         | 0.0534 | -0.707  | ATP2A3,ATP2B1,CAMKK1,CREB5,GRIN2D,HDAC9,ITPR2,PRKAR2A,RAP2B,RCAN1,RCAN3                                                                                                                          |
| Chondroitin Sulfate Biosynthesis (Late Stages)                                  | 0.39          | 0.0625 | #NUM!   | CHPF,CHST4,SULT2B1                                                                                                                                                                               |
| Telomerase Signaling                                                            | 0.389         | 0.0561 | 0.447   | ELF3,ETS1,HDAC9,PIK3R1,PPP2R5B,RAP2B                                                                                                                                                             |
| 14-3-3-mediated Signaling                                                       | 0.388         | 0.0551 | 1.342   | FOS,JUN,PIK3R1,PRKCA,RAP2B,TUBA4A,TUBB2A                                                                                                                                                         |
| Remodeling of Epithelial Adherens Junctions                                     | 0.384         | 0.0588 | #NUM!   | MAPRE3,TUBA4A,TUBB2A,ZYX                                                                                                                                                                         |
| Endocannabinoid Neuronal Synapse Pathway                                        | 0.38          | 0.0547 | 0.447   | ABHD6,FAAH,GNA14,GNAI1,GRIN2D,PRKAR2A,PTGS2                                                                                                                                                      |
| Purine Nucleotides De Novo Biosynthesis II                                      | 0.379         | 0.0909 | #NUM!   | IMPDH1                                                                                                                                                                                           |
| cAMP-mediated signaling                                                         | 0.378         | 0.0524 | -0.302  | AKAP12,CNGA1,CREB5,DUSP1,GNAI1,HTR1D,PDE12,PDE9A,PKIB,PRKAR2A,RAP1GAP, RGS2                                                                                                                      |
| Hematopoiesis from Pluripotent Stem Cells                                       | 0.377         | 0.0612 | #NUM!   | CXCL8,KITLG,LIF                                                                                                                                                                                  |
| Cell Cycle: G2/M DNA Damage Checkpoint Regulation                               | 0.377         | 0.0612 | #NUM!   | AURKA,GADD45A,HIPK2                                                                                                                                                                              |
| Role of JAK1 and JAK3 in $\gamma$ Cytokine Signaling                            | 0.373         | 0.058  | #NUM!   | IL15RA,IRS2,PIK3R1,RAP2B                                                                                                                                                                         |
| White Adipose Tissue Browning Pathway                                           | 0.372         | 0.0543 | 0.816   | CREB5,FGFR2,LDHA,PPARG,PRKAR2A,RARG,SLC16A1                                                                                                                                                      |
| Crosstalk between Dendritic Cells and Natural Killer Cells                      | 0.372         | 0.0562 | #NUM!   | FAS,HLA-B,HLA-C,HLA-E,IL15RA                                                                                                                                                                     |
| OX40 Signaling Pathway                                                          | 0.362         | 0.0556 | #NUM!   | B2M,HLA-B,HLA-C,HLA-E,JUN                                                                                                                                                                        |
| GM-CSF Signaling                                                                | 0.362         | 0.0571 | #NUM!   | ETS1,PIK3R1,PIM1,RAP2B                                                                                                                                                                           |
| Assembly of RNA Polymerase I Complex                                            | 0.351         | 0.0833 | #NUM!   | TAF1A                                                                                                                                                                                            |
| Hematopoiesis from Multipotent Stem Cells                                       | 0.351         | 0.0833 | #NUM!   | KITLG                                                                                                                                                                                            |
| 4-1BB Signaling in T Lymphocytes                                                | 0.338         | 0.0625 | #NUM!   | JUN,MAP3K14                                                                                                                                                                                      |
| GPCR-Mediated Integration of Enteroendocrine Signaling Exemplified by an L Cell | 0.331         | 0.0548 | 0       | GNA14,GNAI1,ITPR2,PRKAR2A                                                                                                                                                                        |
| T Helper Cell Differentiation                                                   | 0.331         | 0.0548 | #NUM!   | BCL6,HLA-B,IFNGR2,TGFB2R2                                                                                                                                                                        |
| PKC $\theta$ Signaling in T Lymphocytes                                         | 0.33          | 0.0516 | 1.414   | BCL10,FOS,FYN,HLA-B,JUN,MAP3K14,PIK3R1,RAP2B                                                                                                                                                     |
| Fatty Acid Activation                                                           | 0.326         | 0.0769 | #NUM!   | ACSL1                                                                                                                                                                                            |
| Guanosine Nucleotides Degradation III                                           | 0.326         | 0.0769 | #NUM!   | NT5E                                                                                                                                                                                             |
| UDP-N-acetyl-D-galactosamine Biosynthesis II                                    | 0.326         | 0.0769 | #NUM!   | HK1                                                                                                                                                                                              |
| CCR5 Signaling in Macrophages                                                   | 0.325         | 0.0532 | 1       | FAS,FOS,GNAI1,JUN,PRKCA                                                                                                                                                                          |
| Fatty Acid $\beta$ -oxidation I                                                 | 0.323         | 0.0606 | #NUM!   | ACAA1,ACSL1                                                                                                                                                                                      |
| Endocannabinoid Developing Neuron Pathway                                       | 0.321         | 0.0522 | 0.447   | CREB5,GNAI1,PIK3R1,PRKAR2A,RAP1GAP,RAP2B                                                                                                                                                         |
| Hypoxia Signaling in the Cardiovascular System                                  | 0.321         | 0.0541 | #NUM!   | CREB5,EDN1,JUN,LDHA                                                                                                                                                                              |
| Th2 Pathway                                                                     | 0.319         | 0.0515 | -1.342  | ACVR1,CXCR4,HLA-B,JAG2,JUN,PIK3R1,TGFB2R2                                                                                                                                                        |
| PTEN Signaling                                                                  | 0.319         | 0.0515 | 0.816   | CASP9,FGFR2,INPPL1,PIK3R1,RAP2B,RPS6KB2,TGFB2R2                                                                                                                                                  |
| Transcriptional Regulatory Network in Embryonic Stem Cells                      | 0.316         | 0.0556 | #NUM!   | GATA6,HNF4A,ZFX3                                                                                                                                                                                 |
| fMLP Signaling in Neutrophils                                                   | 0.314         | 0.0517 | -0.816  | GNAI1,ITPR2,NOX1,PIK3R1,PRKCA,RAP2B                                                                                                                                                              |
| Role of JAK2 in Hormone-like Cytokine Signaling                                 | 0.31          | 0.0588 | #NUM!   | IRS2,SH2B3                                                                                                                                                                                       |
| Fc Epsilon RI Signaling                                                         | 0.307         | 0.0513 | 0       | FYN,GAB1,INPPL1,PIK3R1,PRKCA,RAP2B                                                                                                                                                               |
| CREB Signaling in Neurons                                                       | 0.304         | 0.0487 | 1.961   | ADGRF1,ADGRG5,CELSR1,CREB5,F2R,F2RL1,FGFR2,GNA14,GNAI1,GNAZ,GPR158,GPR160,GPR35,GPR87,GPRC5A,GRIN2D,HCAR1,HRH1,HTR1D,ITPR2,LGR4,NMUR2,PIK3R1,POLR2L,PRKAR2A,PRKCA,RAP2B,TGFB2,TGFB2R2            |
| Leukotriene Biosynthesis                                                        | 0.303         | 0.0714 | #NUM!   | DPEP1                                                                                                                                                                                            |
| Colanic Acid Building Blocks Biosynthesis                                       | 0.303         | 0.0714 | #NUM!   | TSTA3                                                                                                                                                                                            |
| Macropinocytosis Signaling                                                      | 0.303         | 0.0526 | #NUM!   | ITGB6,PIK3R1,PRKCA,RAP2B                                                                                                                                                                         |
| Nucleotide Excision Repair Pathway                                              | 0.296         | 0.0571 | #NUM!   | POLR2L,XPA                                                                                                                                                                                       |
| Chondroitin Sulfate Biosynthesis                                                | 0.294         | 0.0536 | #NUM!   | CHPF,CHST4,SULT2B1                                                                                                                                                                               |
| Phospholipase C Signaling                                                       | 0.29          | 0.0489 | 0.632   | CREB5,FYN,HDAC9,ITPR2,PLD1,PLD2,PRKCA,RAP2B,RHOB,RHOD,RHO, RND3,TGM2                                                                                                                             |
| CNTF Signaling                                                                  | 0.284         | 0.0526 | #NUM!   | PIK3R1,RAP2B,RPS6KB2                                                                                                                                                                             |
| Role of CHK Proteins in Cell Cycle Checkpoint Control                           | 0.284         | 0.0526 | #NUM!   | CDC25A,E2F7,PPP2R5B                                                                                                                                                                              |
| Type II Diabetes Mellitus Signaling                                             | 0.279         | 0.0493 | -0.447  | ACSL1,IRS2,MAP3K14,PIK3R1,PPARG,PRKCA,SMPD3                                                                                                                                                      |
| MSP-RON Signaling Pathway                                                       | 0.275         | 0.0517 | #NUM!   | KLK10,KLK6,PIK3R1                                                                                                                                                                                |
| FLT3 Signaling in Hematopoietic Progenitor Cells                                | 0.268         | 0.05   | 1       | CREB5,GAB2,PIK3R1,RAP2B                                                                                                                                                                          |
| JAK/Stat Signaling                                                              | 0.268         | 0.05   | 1       | FOS,JUN,PIK3R1,RAP2B                                                                                                                                                                             |
| Dermatan Sulfate Biosynthesis                                                   | 0.265         | 0.0508 | #NUM!   | CHPF,CHST4,SULT2B1                                                                                                                                                                               |
| Granzyme B Signaling                                                            | 0.264         | 0.0625 | #NUM!   | CASP9                                                                                                                                                                                            |
| Chondroitin Sulfate Degradation (Metazoa)                                       | 0.264         | 0.0625 | #NUM!   | CEMIP                                                                                                                                                                                            |
| Adenosine Nucleotides Degradation II                                            | 0.264         | 0.0625 | #NUM!   | NT5E                                                                                                                                                                                             |
| Parkinson's Signaling                                                           | 0.264         | 0.0625 | #NUM!   | CASP9                                                                                                                                                                                            |
| Endometrial Cancer Signaling                                                    | 0.256         | 0.05   | #NUM!   | CASP9,PIK3R1,RAP2B                                                                                                                                                                               |
| Gai Signaling                                                                   | 0.253         | 0.048  | 0.447   | CAV1,GNAI1,HTR1D,PRKAR2A,RAP1GAP,RAP2B                                                                                                                                                           |
| FAK Signaling                                                                   | 0.249         | 0.0481 | #NUM!   | CAPN5,CAPN9,FYN,PIK3R1,RAP2B                                                                                                                                                                     |
| Autophagy                                                                       | 0.247         | 0.0492 | #NUM!   | CTSE,CTSS,MAP1LC3B                                                                                                                                                                               |
| Isoleucine Degradation I                                                        | 0.246         | 0.0588 | #NUM!   | ACAT1                                                                                                                                                                                            |
| $\gamma$ -linolenate Biosynthesis II (Animals)                                  | 0.246         | 0.0588 | #NUM!   | ACSL1                                                                                                                                                                                            |
| Dermatan Sulfate Degradation (Metazoa)                                          | 0.246         | 0.0588 | #NUM!   | CEMIP                                                                                                                                                                                            |
| D-myo-inositol (1,4,5)-trisphosphate Degradation                                | 0.246         | 0.0588 | #NUM!   | INPPL1                                                                                                                                                                                           |



Table S3: Pathways identification after ATRA+PDT compared to PDT.

| Ingenuity Canonical Pathways                                                        | -log(p-value) | Ratio  | z-score | Molecules                                                                            |
|-------------------------------------------------------------------------------------|---------------|--------|---------|--------------------------------------------------------------------------------------|
| Differential Regulation of Cytokine Production in Macrophages and T Helper Cells by | 0.231         | 0.0556 | #NUM!   | CXCL1                                                                                |
| Cardiomyocyte Differentiation via BMP Receptors                                     | 0.203         | 0.05   | #NUM!   | BMP4                                                                                 |
| HOTAIR Regulatory Pathway                                                           | 0             | 0.0437 | -1.89   | AGO4,CD44,IRF1,MMP15,MMP7,PIK3R1,WNT11                                               |
| Synaptogenesis Signaling Pathway                                                    | 0             | 0.0449 | -1.069  | CREB5,EFNA1,EPHA2,EPHB6,FYN,GRIN2D,LRP8,PIK3R1,PRKAR2A,RAP2B,RPS6KB2,SNCG,STX1A,SYT7 |
| Antioxidant Action of Vitamin C                                                     | 0             | 0.0459 | -1      | PLAAT3,PLAAT4,PLD1,PLD2,SLC23A3                                                      |
| Apelin Cardiomyocyte Signaling Pathway                                              | 0             | 0.0404 | -1      | ATP2A3,GNAI1,PIK3R1,PRKCA                                                            |
| Reelin Signaling in Neurons                                                         | 0             | 0.041  | -0.447  | FYN,GRIN2D,LRP8,PDK4,PIK3R1                                                          |
| GPCR-Mediated Nutrient Sensing in Enteroendocrine Cells                             | 0             | 0.0446 | -0.447  | GNA14,GNAI1,ITPR2,PRKAR2A,PRKCA                                                      |
| Synaptic Long Term Depression                                                       | 0             | 0.0476 | -0.333  | GNA14,GNAI1,GNAZ,ITPR2,PLAAT3,PLAAT4,PPP2R5B,PRKCA,RAP2B                             |
| EIF2 Signaling                                                                      | 0             | 0.0357 | 0       | AGO4,ATF3,EIF2AK2,EIF4A2,PIK3R1,PPP1R15A,RAP2B,WARS1                                 |
| Th1 Pathway                                                                         | 0             | 0.0413 | 0       | HLA-B,IFNGR2,IRF1,LGALS9,PIK3R1                                                      |
| Adrenomedullin signaling pathway                                                    | 0             | 0.0406 | 0       | FOS,GNA14,IL1RN,ITPR2,PIK3R1,PPARG,PRKAR2A,RAP2B                                     |
| Gα12/13 Signaling                                                                   | 0             | 0.0458 | 0.816   | F2R,F2RL1,JUN,PIK3R1,RAP2B,RASA1                                                     |
| Actin Cytoskeleton Signaling                                                        | 0             | 0.0352 | 1.89    | F2R,FGD3,FGF19,GSN,IQGAP2,PIK3R1,PIP5K1A,RAP2B                                       |
| Role of BRCA1 in DNA Damage Response                                                | 0             | 0.0375 | #NUM!   | E2F7,FANCF,GADD45A                                                                   |
| Activation of IRF by Cytosolic Pattern Recognition Receptors                        | 0             | 0.0476 | #NUM!   | IFIH1,IRF7,JUN                                                                       |
| Claudin-mediated Endocytosis Signaling                                              | 0             | 0.0466 | #NUM!   | AAK1,APOL1,CLU,F2R,FGF19,ITGB6,PIK3R1,SERPINA1,UBC                                   |
| TREM1 Signaling                                                                     | 0             | 0.04   | #NUM!   | CXCL3,CXCL8,LAT2                                                                     |
| FcγRIIB Signaling in B Lymphocytes                                                  | 0             | 0.0267 | #NUM!   | PIK3R1,RAP2B                                                                         |
| CCR3 Signaling in Eosinophils                                                       | 0             | 0.0403 | #NUM!   | GNAI1,ITPR2,PIK3R1,PRKCA,RAP2B                                                       |
| Oncostatin M Signaling                                                              | 0             | 0.0465 | #NUM!   | MT2A,RAP2B                                                                           |
| Role of Cytokines in Mediating Communication between Immune Cells                   | 0             | 0.037  | #NUM!   | CXCL8,IL1RN                                                                          |
| Mechanisms of Viral Exit from Host Cells                                            | 0             | 0.0244 | #NUM!   | PRKCA                                                                                |
| Melatonin Signaling                                                                 | 0             | 0.0417 | #NUM!   | GNAI1,PRKAR2A,PRKCA                                                                  |
| Cellular Effects of Sildenafil (Viagra)                                             | 0             | 0.0153 | #NUM!   | ITPR2,PRKAR2A                                                                        |
| Agrin Interactions at Neuromuscular Junction                                        | 0             | 0.0429 | #NUM!   | DVL1,JUN,RAP2B                                                                       |
| ICOS-COSL Signaling in T Helper Cells                                               | 0             | 0.045  | #NUM!   | GAB2,HLA-B,ITPR2,PIK3R1,PLEKHA2                                                      |
| Lipid Antigen Presentation by CD1                                                   | 0             | 0.0385 | #NUM!   | B2M                                                                                  |
| Mitotic Roles of Polo-Like Kinase                                                   | 0             | 0.0455 | #NUM!   | CDC25A,PLK3,PPP2R5B                                                                  |
| DNA Methylation and Transcriptional Repression Signaling                            | 0             | 0.0286 | #NUM!   | DNMT3A                                                                               |
| Antiproliferative Role of Somatostatin Receptor 2                                   | 0             | 0.026  | #NUM!   | PIK3R1,RAP2B                                                                         |
| Role of Oct4 in Mammalian Embryonic Stem Cell Pluripotency                          | 0             | 0.0435 | #NUM!   | CCNF,NR5A2                                                                           |
| Melanoma Signaling                                                                  | 0             | 0.04   | #NUM!   | PIK3R1,RAP2B                                                                         |
| Prostate Cancer Signaling                                                           | 0             | 0.044  | #NUM!   | CASP9,CREB5,PIK3R1,RAP2B                                                             |
| Primary Immunodeficiency Signaling                                                  | 0             | 0.02   | #NUM!   | TAP2                                                                                 |
| Systemic Lupus Erythematosus Signaling                                              | 0             | 0.0349 | #NUM!   | FOS,HLA-B,HLA-C,HLA-E,IL1RN,JUN,PIK3R1,RAP2B                                         |
| PAK Signaling                                                                       | 0             | 0.0189 | #NUM!   | PIK3R1,RAP2B                                                                         |
| Altered T Cell and B Cell Signaling in Rheumatoid Arthritis                         | 0             | 0.0444 | #NUM!   | FAS,HLA-B,IL1RN,MAP3K14                                                              |
| Regulation of eIF4 and p70S6K Signaling                                             | 0             | 0.0301 | #NUM!   | AGO4,EIF4A2,PIK3R1,PPP2R5B,RAP2B                                                     |
| Leptin Signaling in Obesity                                                         | 0             | 0.027  | #NUM!   | PIK3R1,PRKAR2A                                                                       |
| B Cell Development                                                                  | 0             | 0.0278 | #NUM!   | HLA-B                                                                                |
| Role of Wnt/GSK-3β Signaling in the Pathogenesis of Influenza                       | 0             | 0.0385 | #NUM!   | DVL1,NCOA3,WNT11                                                                     |
| Nur77 Signaling in T Lymphocytes                                                    | 0             | 0.0441 | #NUM!   | CASP9,HDAC9,PRKCA                                                                    |
| MIF-mediated Glucocorticoid Regulation                                              | 0             | 0.0294 | #NUM!   | PTGS2                                                                                |
| Cell Cycle Control of Chromosomal Replication                                       | 0             | 0.0179 | #NUM!   | CDK6                                                                                 |
| Assembly of RNA Polymerase II Complex                                               | 0             | 0.02   | #NUM!   | POLR2L                                                                               |
| IL-17A Signaling in Airway Cells                                                    | 0             | 0.0462 | #NUM!   | CXCL1,CXCL3,PIK3R1                                                                   |
| Role of JAK1, JAK2 and TYK2 in Interferon Signaling                                 | 0             | 0.0417 | #NUM!   | IFNGR2                                                                               |
| Paxillin Signaling                                                                  | 0             | 0.0278 | #NUM!   | ITGB6,PIK3R1,RAP2B                                                                   |
| nNOS Signaling in Skeletal Muscle Cells                                             | 0             | 0.0244 | #NUM!   | SNTB1                                                                                |
| ErbB2-ErbB3 Signaling                                                               | 0             | 0.0462 | #NUM!   | JUN,PIK3R1,RAP2B                                                                     |
| ErbB4 Signaling                                                                     | 0             | 0.0448 | #NUM!   | PIK3R1,PRKCA,RAP2B                                                                   |
| Netrin Signaling                                                                    | 0             | 0.0308 | #NUM!   | ABLIM1,PRKAR2A                                                                       |
| Heparan Sulfate Biosynthesis                                                        | 0             | 0.038  | #NUM!   | AADAC,CHST4,SULT2B1                                                                  |
| Thyroid Hormone Metabolism II (via Conjugation and/or Degradation)                  | 0             | 0.0263 | #NUM!   | UGT1A10 (includes others)                                                            |
| Heparan Sulfate Biosynthesis (Late Stages)                                          | 0             | 0.0417 | #NUM!   | AADAC,CHST4,SULT2B1                                                                  |
| tRNA Splicing                                                                       | 0             | 0.0455 | #NUM!   | PDE12,PDE9A                                                                          |
| NAD Salvage Pathway II                                                              | 0             | 0.0385 | #NUM!   | NT5E                                                                                 |
| D-myo-inositol (1,4,5)-Trisphosphate Biosynthesis                                   | 0             | 0.04   | #NUM!   | PIP5K1A                                                                              |
| Glutathione-mediated Detoxification                                                 | 0             | 0.0312 | #NUM!   | GSTA4                                                                                |
| tRNA Charging                                                                       | 0             | 0.0256 | #NUM!   | WARS1                                                                                |
| Dermatan Sulfate Biosynthesis (Late Stages)                                         | 0             | 0.0435 | #NUM!   | CHST4,SULT2B1                                                                        |
| Glycolysis I                                                                        | 0             | 0.0385 | #NUM!   | PFKM                                                                                 |
| Gluconeogenesis I                                                                   | 0             | 0.0385 | #NUM!   | ME1                                                                                  |
| Methionine Degradation I (to Homocysteine)                                          | 0             | 0.0455 | #NUM!   | MAT2A                                                                                |
| Superpathway of Methionine Degradation                                              | 0             | 0.027  | #NUM!   | MAT2A                                                                                |
| Gas Signaling                                                                       | 0             | 0.0374 | #NUM!   | CNGA1,CREB5,PRKAR2A,RGS2                                                             |
| Cysteine Biosynthesis III (mammalia)                                                | 0             | 0.0417 | #NUM!   | MAT2A                                                                                |
| Role of p14/p19ARF in Tumor Suppression                                             | 0             | 0.0345 | #NUM!   | PIK3R1                                                                               |
| Vitamin-C Transport                                                                 | 0             | 0.0417 | #NUM!   | GJB2                                                                                 |
| Oxidative Phosphorylation                                                           | 0             | 0.0275 | #NUM!   | ATP5MC1,ATP5MC3,UQCRCF1                                                              |
| GABA Receptor Signaling                                                             | 0             | 0.0211 | #NUM!   | GABRP,UBC                                                                            |
| Phototransduction Pathway                                                           | 0             | 0.0385 | #NUM!   | CNGA1,PRKAR2A                                                                        |
| Glutamate Receptor Signaling                                                        | 0             | 0.0175 | #NUM!   | GRIN2D                                                                               |
| Notch Signaling                                                                     | 0             | 0.027  | #NUM!   | JAG2                                                                                 |
| VEGF Signaling                                                                      | 0             | 0.0303 | #NUM!   | PIK3R1,PRKCA,RAP2B                                                                   |
| Gustation Pathway                                                                   | 0             | 0.0323 | #NUM!   | ASIC1,ITPR2,PDE12,PDE9A,PRKAR2A                                                      |
| Phagosome Formation                                                                 | 0             | 0.0451 | #NUM!   | PIK3R1,PRKCA,RHOB,RHOD,RHOU,RND3                                                     |
| NER Pathway                                                                         | 0             | 0.0194 | #NUM!   | POLR2L,XPA                                                                           |
| Apelin Cardiac Fibroblast Signaling Pathway                                         | 0             | 0.0435 | #NUM!   | TGFB2                                                                                |
| Apelin Adipocyte Signaling Pathway                                                  | 0             | 0.0366 | #NUM!   | GNAI1,NOX1,PRKAR2A                                                                   |
| IL-23 Signaling Pathway                                                             | 0             | 0.0227 | #NUM!   | PIK3R1                                                                               |
| Kinetochore Metaphase Signaling Pathway                                             | 0             | 0.0297 | #NUM!   | INCENP,PPP1R10,PPP2R5B                                                               |
| Complement System                                                                   | 0             | 0.027  | #NUM!   | CD55                                                                                 |
