# Supplementary material for: All-trans retinoic acid enhances the anti-tumour effects of fimaporfin-based photodynamic therapy
Source: bioRxiv or medRxiv preprint supplement (doi:10.1101/2022.04.28.487643), 2022-08-08
Supplement: Supplementary file [file media-13.pdf]

Supplementary Table 4. Upstream regulator analysis based gene set enrichment analysis (GSEA) of differentially expressed genes (DEGs) after ATRA+PDT compared to PDT

| Upstream Regulator                           | Expr Log Ratio | Molecule Type                       | Predicted Activation State | Activation z-score | p-value of overlap | Target Molecules in Dataset                                                                                                                         | Mechanistic Network |
|----------------------------------------------|----------------|-------------------------------------|----------------------------|--------------------|--------------------|-----------------------------------------------------------------------------------------------------------------------------------------------------|---------------------|
| IL32                                         |                | cytokine                            |                            | 0.58               | 0.00635            | BBC3,CXCL1,CXCL3,CXCL8,EIF2AK2,FAS,MCL1,PTGS2                                                                                                       | 424 (17)            |
| retinoid                                     |                | chemical drug                       |                            | 0.579              | 0.00102            | CEACAM1,DUSP1,EDN1,HBEGF,LIMA1,MUC2,PLAAT4,PTGS2                                                                                                    | 478 (24)            |
| miR-145-5p (and other miRNAs w/seed UCCAGUU) |                | mature microRNA                     |                            | 0.578              | 0.00578            | ACSS2,CCNA2,KLF4,KRT7,PADI1,PARP8,RASA1,RTKN,SWAP70                                                                                                 |                     |
| TET2                                         |                | enzyme                              |                            | 0.577              | 0.0224             | ADAM8,BCL3,CEBPA,CYP2S1,GRK5,IFIT3,IFITM3,KCNE3,MAFF,MTSS1,RND3,SH2B3,SORL1                                                                         |                     |
| BHLHE40                                      |                | transcription regulator             |                            | 0.577              | 0.0131             | ANXA1,ATP1B1,CRABP2,CXCL3,ECM1,IFITM2,IL1R2,MYB,PHLDA1,PLAC8,RND3,TXK                                                                               |                     |
| PRDX1                                        |                | enzyme                              |                            | 0.577              | 0.00387            | ECM1,EGLN1,PTGS2,REL                                                                                                                                | 217 (7)             |
| lipoarabinomannan                            |                | chemical - endogenous non-mammalian |                            | 0.577              | 0.0241             | CXCL2,CXCL8,CXCR4,IRF1                                                                                                                              |                     |
| CNN2                                         |                | growth factor                       |                            | 0.574              | 0.0371             | CD44,EGR1,FLNB,IGF2,JUN,KITLG,LTBP3,MIA3,SDC4,SOX4                                                                                                  |                     |
| mir-223                                      |                | microRNA                            |                            | 0.573              | 0.0113             | ALCAM,CAMKK1,EMP1,GASK1B,ID2,IL1RN,MSMO1,MT1E,MUC13,MYOF,NDRG2,SCARB1,STMN1,TOB1                                                                    |                     |
| NR3C1                                        |                | ligand-dependent nuclear receptor   |                            | 0.57               | 6.41E-15           | ISP1,DUSP16,EDN1,EFNA1,EGR1,EMP1,ERN1,ERRF1,F2R,F2RL1,FOS,GAB1,GADD45A,GADD45B,GLCCI1,HGD,HMGCS2,HSPA6,IFIH1,IL15RA,IRF1,ITGB6,JUN,JUND,KLF9,LIF,I  | 562 (21)            |
| SHH                                          |                | peptidase                           |                            | 0.57               | 0.00274            | AMD1,ANGPT1,AQP5,BMP4,CAV1,CCNG2,CD25A,DDC,FGF19,GATA2,GLI1,GLI2,IGF2,PPARG,RUNX2,SOSTDC1,TGFB2,TJP1,TSC22D3                                        | 463 (22)            |
| fish oils                                    |                | chemical drug                       |                            | 0.57               | 0.000131           | ACSL1,CEBPA,CPT1A,CYP1A1,CYP2B6,EDN1,NR1P1,NUC2,PIK3R1,PTGS2                                                                                        | 362 (10)            |
| Tc7                                          |                | transcription regulator             |                            | 0.566              | 0.0000362          | 6,ARRDC4,ECM1,FAAH,FYN,ID2,IL15RA,KLF6,LRIG1,MBOAT1,MSMO1,MXD1,NCOA7,NR5A2,NTN4,OSBPL5,PHLDA1,PPARG,RARG,REL,SC5D,SH3BGR2,SOX12,SQLE,TBL1X,T        | 343 (11)            |
| INSIG1                                       |                | other                               |                            | 0.566              | 0.00000547         | ACSS2,CD68,CXCL2,CXCL3,CXCR4,ELOVL6,HMGCR,HMGCS2,IDI1,IRS2,LCN2,LIPG,LSS,NFKBIZ,PLD1,PPARG,SCARB1,SQLE,STEAP2                                       | 422 (16)            |
| SQSTM1                                       |                | transcription regulator             |                            | 0.563              | 0.000866           | CXCL2,CYP2B6,EDN1,HBEGF,IL15RA,IRF1,JUN,MAP1L3B,TSC22D1                                                                                             |                     |
| UCLH1                                        |                | peptidase                           |                            | 0.563              | 0.0346             | CGAS,HDAC9,HERC6,ITPRIP,LPP,PFKM,PSME1,SLC39A8                                                                                                      |                     |
| WNT3A                                        |                | cytokine                            |                            | 0.567              | 9.21E-09           | IN2,BBC3,BGN,BMP4,CCN1,CD44,CD68,CEBPA,CYP24A1,DDIT4,DKK1,DVL1,EDN1,ENG,FHL2,GLI1,IRS2,JD2,JUN,KITLG,KLF4,LCN2,MCL1,MT1X,NR5A2,PLD1,PPARG,PTGS2,I   | 461 (22)            |
| 4-nitroquinoline-1-oxide                     |                | chemical toxicant                   |                            | 0.555              | 0.000778           | DLRKA,CCNA2,CDK6,EGR1,PTGS2                                                                                                                         | 367 (7)             |
| POMC                                         |                | other                               |                            | 0.547              | 0.0263             | CXCR4,DUSP1,FOS,FOSL1,IGF2,JUN,PCSK5,REN,SCARB1,SMAD3                                                                                               |                     |
| EGFR                                         |                | kinase                              |                            | 0.539              | 8.93E-13           | F2RL1,FOS,FOSL1,GADD45A,GCNT2,HBEGF,HMGA2,HSPB1,IGF2,IQGAP2,IRF1,ITGB6,JUN,JUND,LAMC2,LCN2,LRP8,MACF1,MCL1,MGAT1,NOX1,NT5E,NUDC,PTGS2,RHOB,RU       | 530 (22)            |
| plicamycin                                   |                | chemical drug                       |                            | 0.537              | 0.00000412         | BBC3,CA9,CD25A,CXCL1,FYN,GJB2,GPD1,HMGR,MAOA,MUC2,PAI1,PPP1R1B,ROR1,SEMA7A,SERPINE2,STAR1D,STX1A,TGFB2,UBC,VDR                                      | 481 (19)            |
| EHF                                          |                | transcription regulator             |                            | 0.535              | 0.000238           | BMP4,CRABP2,CYP1A1,EHF,EREG,GATA2,GRHL3,IL1RN,CLK6,SECL,SERPINA3,SPDEF,TFPI,ZFP36L1                                                                 |                     |
| phenylbutazone                               |                | chemical drug                       |                            | 0.532              | 0.00000528         | ABCC2,ANXA1,CD44,CLU,LAMC2,LCN2,LGALS3,PSMB8,PTGS2,RCN1,S100A10,TNFRSF12A,TSPAN8                                                                    | 328 (11)            |
| CDK8                                         |                | kinase                              |                            | 0.528              | 0.00295            | CD44,CXCL1,CXCL2,CXCL8,CXCR4                                                                                                                        | 368 (11)            |
| ADM                                          |                | other                               |                            | 0.526              | 0.0443             | CXCL2,EDN1,FOS,PPARG,PTGS2,REN                                                                                                                      |                     |
| CIP2A                                        |                | other                               |                            | 0.525              | 0.000893           | CDKN2B,GADD45A,PKD4,PDLM7,PTPRB,RHOD,S100A16,SAT1,SERPINE2,SLC16A3,SLC22A18,TUBA4A                                                                  | 349 (8)             |
| deferoxamine                                 |                | chemical drug                       |                            | 0.508              | 0.00000102         | 3A5,DUSP1,DUSP16,DUSP5,ECM1,EGLN1,ERRF1,FOS,GADD45A,GADD45B,GDF15,HSPA1A/HSPA1B,IGFBP2,JAG2,JUN,LCN2,LDHA,MAP1LC3B,ME1,PMAIP1,PPARG,PRKCA,S         | 452 (18)            |
| TFAP4                                        |                | transcription regulator             |                            | 0.508              | 0.000133           | CASP9,CCNG2,CD44,CLDN1,EGR1,ETV1,FOS,GDF15,LIF,STEAP3                                                                                               | 368 (7)             |
| AR                                           |                | ligand-dependent nuclear receptor   |                            | 0.507              | 1.56E-12           | 11,IFIH1,IGF2,KITLG,LAMA5,LRIG1,LRKK1,MAOA,MSMO1,MT1X,MYB,MYO1B,NPC1,NR5A2,PDE9A,PDIA5,PMAIP1,PRKCA,PROS1,PSCA,RARRS1,REN,RHOB,SECL,SEC61B,SE       | 547 (26)            |
| NR1I2                                        |                | ligand-dependent nuclear receptor   |                            | 0.504              | 0.00000158         | 10,ABCC2,ALDH1A1,CEBPA,CPT1A,CYP1A1,CYP24A1,CYP2B6,CYP3A5,EGR1,ELOVL6,ENTPD5,FGF19,HMGCS2,HNF4A,INSIG1,JUN,LCN2,MYB,NR0B2,PPARG,SCARB1,TCN2         | 651 (24)            |
| SP1                                          |                | transcription regulator             |                            | 0.494              | 7.54E-16           | 3R1,EIF2AK2,ENG,ENTPD5,EREG,F2R,FAS,FOS,FOSL1,FYN,GDF15,HBEGF,HMGCR,HNF4A,IFIH1,IGF2,IRF1,JUN,KLF4,KLF6,LTBP3,MAOA,MOB,MAT2A,MCL1,MUC2,NCOA3,I      | 537 (20)            |
| EGR2                                         |                | transcription regulator             |                            | 0.493              | 0.00102            | ABCC1,ACVR1,ASS1,BCL6,CBL8,EGR1,FOS,HMGCR,ID2,IGF2,IL1R2,JUN,KITLG,LTBP3,MYB,NCPA,SLC16A1,SQLE                                                      | 476 (20)            |
| KAT2B                                        |                | transcription regulator             |                            | 0.491              | 0.0346             | B2M,FOSB,GLI1,HLA-B,PTGS2,TGFB2                                                                                                                     |                     |
| 3-methyladenine                              |                | chemical toxicant                   |                            | 0.489              | 0.00221            | AGR2,CXCL2,CXCL8,MAP1LC3B,PTGS2,RCAN1,RUNX2                                                                                                         | 401 (21)            |
| MTPN                                         |                | transcription regulator             |                            | 0.487              | 0.000168           | ANXA1,CASP7,CASP9,CCNA2,CEBPA,DDC,EDN1,ENG,FAS,FOS,JUN,S100A10,TGFB2                                                                                | 370 (11)            |
| LGALS1                                       |                | other                               |                            | 0.481              | 0.0281             | CXCL16,CXCL2,GLI1,GPCPD1,HBEGF,IFNGR2,INSIG1,LGALS3                                                                                                 |                     |
| HSD17B4                                      |                | enzyme                              |                            | 0.478              | 0.000147           | ACAA1,ACSL1,GLI1,GLI2,PKK4,PEX11A,PTGS2                                                                                                             | 481 (7)             |
| Growth hormone                               |                | group                               |                            | 0.474              | 3.42E-09           | 3PD,CLU,COL18A1,CXCL1,CXCL2,DYRK2,EGR1,FOS,GDF15,IGF2,IGFBP2,IGFBP6,IRF1,JUN,NDRG2,NEED9,NR1D1,PKK4,PLAAT3,PPARG,PPP1R15A,S100A4,SCARB1,SGK1,TE     | 540 (23)            |
| gemfibrozil                                  |                | chemical drug                       |                            | 0.472              | 0.000042           | CASP9,CD25A,CPT1A,CXCL8,CXCR4,CYP3A5,EGR1,FAS,FOSL1,MDK,NT5E,PTGS2,SLC28A3                                                                          | 451 (24)            |
| AGT                                          |                | growth factor                       |                            | 0.471              | 6.16E-16           | 1,GLI2,GRK5,HBEGF,HMGR,HSPA1A/HSPA1B,HSPA1L,HSPB1,HSPG2,IDI1,IGFBP2,IRS2,ITPR2,JUN,KITLG,LATS2,LCN2,LGALS3,LIF,LIPG,LOXL4,LPP,LRP8,LSS,LTBP3,LTBP4  | 635 (23)            |
| IRF2                                         |                | transcription regulator             |                            | 0.47               | 6.47E-10           | A13,B2M,CEACAM1,CFTR,CLDN2,CTSS,DST,ITPR2,IRF1,IRF7,KLF4,LCN2,MMP7,PSMB10,PSMB8,PSME1,PSME2,PTGS2,RARRS1,TAP2,TBP3,TR1                              | 293 (18)            |
| daunorubicin                                 |                | chemical drug                       |                            | 0.464              | 0.000188           | ABCA2,ABCC1,CFTR,DMT1,MCL1,PFKM,TAP2,UQCRFS1                                                                                                        | 428 (17)            |
| 3,4,5,3',4'-pentachlorobiphenyl              |                | chemical toxicant                   |                            | 0.461              | 0.0232             | BMP4,CAPN9,CD44,CYP1A1,GADD45A,HSPA1A/HSPA1B,JUN,NR0B2,TIPARP                                                                                       |                     |
| mir-130                                      |                | microRNA                            |                            | 0.454              | 0.0333             | CD68,HXA5,KLF4,LCN2,PTGS2                                                                                                                           |                     |
| BMP2                                         |                | growth factor                       |                            | 0.453              | 0.00345            | AOC1,BMP4,DKK1,ETS1,FGFR2,FOS,FOSB,GADD45B,ID2,JUN,KLF4,KLF9,NFYA,PCSK6,PPARG,PTGS2,RUNX2,SOSTDC1,TGM2,TOB1,VDR                                     | 544 (25)            |
| AGER                                         |                | transmembrane receptor              |                            | 0.45               | 0.0281             | CXCL2,CXCL3,CXCL8,EGR1,FAS,PTGS2,TJP1,TXNIP                                                                                                         |                     |
| YY1                                          |                | transcription regulator             |                            | 0.449              | 0.000475           | P4,CASP7,CCNA2,CDKN2B,CFTR,CLU,CXCR4,CYP24A1,DNAJB4,DNMT3A,EDN1,EGR1,FAS,FOS,GRIN2D,HMGCR,ID2,IL1R2,INCEP,KLF4,MAT2A,NFKBIZ,PPP1R15A,RND3,SC        | 506 (23)            |
| ibrutinib                                    |                | chemical drug                       |                            | 0.447              | 0.00656            | CD44,CDK6,FAS,MCL1,UGCG                                                                                                                             | 319 (17)            |
| THRA                                         |                | ligand-dependent nuclear receptor   |                            | 0.447              | 0.00653            | BMP4,CD44,CEBPA,CIRBP,CPT1A,CXCL2,CXCL3,ENG,FOS,IRF1,JUN,KLF9,MMP7,PPARG                                                                            | 463 (26)            |
| SELP                                         |                | transmembrane receptor              |                            | 0.447              | 0.0212             | CLK1,CXCL2,CXCL8,CXCR4,IL1R2                                                                                                                        |                     |
| SFN                                          |                | other                               |                            | 0.447              | 0.0107             | BCL6,PKK4,PPP1R1B,SGK1,TJP1                                                                                                                         |                     |
| hymecromone                                  |                | chemical drug                       |                            | 0.447              | 0.000763           | CASP9,CAV1,CD44,CXCL8,CXCR4,FAS,MCL1                                                                                                                | 433 (20)            |
| romidepsin                                   |                | biologic drug                       |                            | 0.44               | 0.0079             | CDKN2B,CXCL8,DUSP1,EGR1,FOS,GSN,JUN,MCL1,PTGS2,RHOB                                                                                                 | 458 (24)            |
| lenalidomide                                 |                | chemical drug                       |                            | 0.437              | 0.000803           | V1,CAV2,CD68,CEBPA,DEPP1,DKK1,DVL1,ELF3,ERN1,HIPK2,IFIH1,IFIT3,KLF4,LIMA1,MYB,NFKBIZ,NMI,PPIF,PROS1,RCAN3,REL,RNF213,ROR1,S100A16,SIPA1L2,SMAD3,WNT | 465 (13)            |
| FAS                                          |                | transmembrane receptor              |                            | 0.431              | 0.00000225         | CXCL2,CXCL3,CXCL8,EFNA1,EGR1,F2RL1,F5,FAS,FOS,FOSB,GRK5,IL15RA,IQGAP2,IRF1,JUN,JUND,LGALS3,MAP4K4,MBOAT7,PDLM7,PLD1,PLD2,PPFBP2,PPP1R15A,RASA1      | 421 (17)            |
| isobutylmethylxanthine                       |                | chemical toxicant                   |                            | 0.429              | 0.000244           | 1,ATP5MC1,CAV1,CAV2,CD44,CEBPA,CEBP,CRABP2,CXCR4,DGAT2,DHRS3,EGR1,ELOVL6,FOS,GNPAT,IFIT3,IRF7,JUN,KLF4,LDHA,PKK4,PLAAT3,PPARG,SCARB1,SGK1,ZC        | 415 (19)            |
| PIM1                                         |                | kinase                              |                            | 0.426              | 0.00193            | BBC3,CAV2,CD44,CD25A,EPHA2,FOSL1,ID2,PIM1,PROS1                                                                                                     | 461 (18)            |
| tetrachlorodibenzodioxin                     |                | chemical toxicant                   |                            | 0.421              | 0.0000435          | YP2S1,EDN1,FAS,FOS,GLI2,HDAC9,HSPA1A/HSPA1B,IGF2,IRF1,JCAD,JUN,JUND,KCNE3,KRT7,MMP15,MYB,NEED9,NR0B2,PJA1,PRKCA,PTGS2,S100A4,SAT1,SERPINH1,SER      | 545 (22)            |
| SRA1                                         |                | transcription regulator             |                            | 0.418              | 0.00295            | CAV1,PPARG,SLC22A12,TBL1X,TGFB2                                                                                                                     | 331 (13)            |
| MED1                                         |                | transcription regulator             |                            | 0.415              | 0.000104           | ACAA1,AOC1,AURKA,BCL3,BCL6,CEBPA,CYP1A1,CYP24A1,CYP2B6,CYP3A5,GADD45A,ID2,KLF4,LIF,MCL1,PKK4,PEX11A,PIM1,PPARG,VDR                                  | 456 (21)            |
| PTK2                                         |                | kinase                              |                            | 0.415              | 0.0247             | BIRC3,CCN1,CSPG4,FOS,LPP,MMP7,TJP1                                                                                                                  |                     |
| WNT1                                         |                | cytokine                            |                            | 0.406              | 0.0000266          | AXIN2,BMP4,CALB2,CEBPA,DKK1,EDN1,EGR1,FOS,HNF4A,IGF2,JUN,PPARG,PTGS2,RARG,RHO,UNX2,SERPINE2,STRA6,TJP1                                              | 498 (24)            |
| gossypol                                     |                | chemical drug                       |                            | 0.404              | 7.02E-08           | ATF3,CXCL1,CXCL8,MCL1,NCOA3,PMAIP1,SAT1                                                                                                             | 398 (11)            |
| AFP                                          |                | transporter                         |                            | 0.404              | 0.00144            | EGR1,FOS,TNFRSF12A,TSC22D1                                                                                                                          |                     |
| BCL2                                         |                | transporter                         |                            | 0.396              | 0.00714            | ABCC1,BBC3,CXCL1,CXCL8,FAS,FOS,GADD45A,IGFBP6,MCAM,MCL1,TGFB2,VDAC1                                                                                 | 487 (21)            |
| 1,25-dihydroxyvitamin D                      |                | chemical drug                       |                            | 0.396              | 0.0158             | CCNG2,CXCL8,CYP24A1,EGR1,IGF2,REN,VDR                                                                                                               |                     |
| nicotinic acid                               |                | chemical - endogenous mammalian     |                            | 0.391              | 0.0299             | ANGPT1,CD68,CEACAM1,ELOVL6,SCARB1                                                                                                                   |                     |
| MMP14                                        |                | peptidase                           |                            | 0.391              | 0.00485            | ATF3,BCAM,CSPG4,DAPK1,PTGS2,SMARCA1                                                                                                                 | 259 (7)             |
| SRSF3                                        |                | other                               |                            | 0.391              | 0.000387           | CD44,CXCL8,E2F7,HIPK2,JUN                                                                                                                           | 359 (12)            |
| carboplatin                                  |                | chemical drug                       |                            | 0.389              | 0.0003             | ABCC2,CD44,CLU,ELF3,LAMC2,LCN2,LGALS3,NT5E,PMAIP1,TNFRSF12A                                                                                         | 197 (7)             |
| beta-carotene                                |                | chemical - endogenous mammalian     |                            | 0.389              | 0.0000504          | ACSS2,APOL6,ARRDC3,DGAT2,ELOVL6,HSPA1A/HSPA1B,ME1,NR1D1,PPARG,PTGS2,SCARB1                                                                          | 370 (13)            |
| GF11                                         |                | transcription regulator             |                            | 0.385              | 0.000000301        | BBC3,BCL3,CARD6,CEBPA,CEP95,CXCL8,CXCR4,EIF2AK2,ETS1,F2R,ID2,IRF1,JUN,MAFF,MMP7,NT5E,REL,SERPINA1,SERPINA3,SGK1,SMAD3,TFF3,TKN2,VDR                 | 453 (17)            |
| paclitaxel                                   |                | chemical drug                       |                            | 0.382              | 3.69E-12           | (CL2,CXCL8,CYP1A1,CYP3A5,DUSP5,EGR1,EMP1,EPHA2,EREG,ETV1,FAS,FOSL1,GADD45B,GDF15,HBEGF,JUN,JUND,KDM6B,MACF1,MCL1,MUC2,NT5E,PHLDA1,PTGS2,REN,        | 510 (20)            |
| CDKN1A                                       |                | kinase                              |                            | 0.382              | 0.00734            | RKA,BBC3,CCN1,CCNA2,CD44,CD25A,CDKN2B,CXCL2,CXCL3,DUSP1,E2F7,FAS,GADD45A,GNAI1,HJURP,HSPA1A/HSPA1B,IFIH1,IFITM3,LGALS3,LGALS3BP,LIMA1,MUC2,STMN1,TC | 453 (17)            |
| NLRP12                                       |                | other                               |                            | 0.381              | 7.59E-08           | BCL3,CXCL2,CXCL8,CXCR4,HLA-B,HLA-C,HLA-E,HLA-J,IL1RN,JUN,MAP3K14,PSMB8                                                                              | 449 (14)            |
| CDH11                                        |                | other                               |                            | 0.378              | 0.000319           | LAMA5,MMP15,MMP7,PIK3R1,SERPINA1,TJP1,TKN2                                                                                                          | 290 (7)             |
| ARHGAP31                                     |                | other                               |                            | 0.378              | 0.000928           | GADD45B,GDF15,ID2,ITGB6,JUN,SERTAD2,TGFB2                                                                                                           |                     |
| BACH1                                        |                | transcription regulator             |                            | 0.378              | 0.0105             | AIFM3,ATP5MC1,ATP5MC3,CXCR4,DUSP1,ME1,PKK4,PPARG                                                                                                    |                     |
| PAK2                                         |                | kinase                              |                            | 0.378              | 0.00221            | ASS1,BMP4,CKB,DUSP1,ETS1,GADD45A,HBEGF                                                                                                              | 477 (18)            |
| SAHM1                                        |                | chemical reagent                    |                            | 0.378              | 0.00399            | ABLIM1,CD44,DDIT4,DOCK5,PPARG,RHO,TRC1D4                                                                                                            |                     |
| CCN5                                         |                | growth factor                       |                            | 0.377              | 0.0000118          | AXIN2,CD44,CEBPA,CLDN1,JUN,KLF4,LAMC2,PPARG,PROCR,SDC4,SMAD3,TFF3,TGFB2                                                                             | 427 (17)            |
| caffeine                                     |                | chemical drug                       |                            | 0.372              | 0.00188            | CAV1,CD25A,CEBPA,CXCL8,EGR1,FOS,FOSB,PPARG,PRKCA,PTGS2                                                                                              | 460 (21)            |
| Hsp27                                        |                | group                               |                            | 0.371              | 0.029              | CASP9,CXCL8,FBXO32,FOS,PPP1R1B,PTGS2                                                                                                                |                     |
| BRAF                                         |                | kinase                              |                            | 0.359              | 0.00022            | CVR1,B3GNT5,BCAM,BIRC3,CASP9,CXCL8,EGR1,GCNT2,HSPG2,LAMC2,MCL1,MSLN,NPC1,NT5E,PSMB10,PSMB8,RND3,SERPINE2,SLC22A5,ST3GAL2,TSC22D1,TSPAN13,UGT        | 431 (22)            |
| cyclophosphamide                             |                | chemical drug                       |                            | 0.342              | 0.00000258         | ATF3,B2M,CD44,CLU,CYP2B6,ELF3,FAS,FOS,HLA-E,IL1R2,KITLG,LAMC2,LGALS3,PSMB8,SLC22A5,TNFRSF12A,TSPAN8,UGCG                                            | 523 (21)            |
| CDX1                                         |                | transcription regulator             |                            | 0.342              | 0.00358            | CLDN1,CLDN2,CLU,CTSE,DDC,FXDY3,HEPH,PTGS2                                                                                                           |                     |
| FGF10                                        |                | growth factor                       |                            | 0.342              | 0.0174             | ANXA1,BMP4,FGFR2,LMO7,LSS,PTGS2,TSPAN8                                                                                                              |                     |
| conjugated linoleic acid                     |                | chemical drug                       |                            | 0.342              | 0.000134           | CEBPA,CXCL8,CXCR4,DUSP1,FOS,GDF15,IL1RN,PPARG,PTGS2                                                                                                 | 476 (19)            |
| flutamide                                    |                | chemical drug                       |                            | 0.34               | 0.00787            | CCN1,CXCL2,CYP1A1,CYP3A5,FOS,GPD1,KITLG,ME1,PSCA,REN,SERPINA5                                                                                       | 385 (7)             |
| butylated hydroxyanisol                      |                | chemical toxicant                   |                            | 0.337              | 0.0165             | FOS,IRF1,IRF7,JUN,NOX1                                                                                                                              |                     |
| EZH2                                         |                | transcription regulator             |                            | 0.337              | 0.0000411          | ISPLD2,CXCL1,CXCL2,CXCL8,CXCR4,DKK1,DUSP5,EFNA1,EGR1,EPC1,GATA6,GDF15,KLF4,LAMC2,LATS2,LCN2,MMP7,MYOEV,NCOA7,PARP12,PLAAT4,PPARG,PTGS2,RAP1C        | 527 (23)            |
| napabucasin                                  |                | chemical drug                       |                            | 0.333              | 0.00384            | ALCAM,ALDH1A1,B2M,CD44,CXCL8,ENG,FGFR2,KITLG,KLF4                                                                                                   |                     |
| MAPK11                                       |                | kinase                              |                            | 0.314              | 0.0188             | CAV1,FAS,FOS,PTGS2,VDR                                                                                                                              |                     |
| fulvestrant                                  |                | chemical drug                       |                            | 0.313              | 4.53E-09           | NA2,CD25A,CEBP,CLK1,DDIT4,EGR1,F2R,FOS,GAB2,GADD45A,GJB2,ID2,IRF1,JUN,LRP8,MYB,MYO1B,NCOA3,NRP1,PMAIP1,PPARG,PTGS2,RNF126,SAPCD2,SEMA7A,SLC         | 532 (24)            |
| miR-124-3p (and other miRNAs w/seed AAGGCAC) |                | mature microRNA                     |                            | 0.313              | 0.00103            | AK2,ARHGAP29,CAV1,CD44,CDK6,CEBPA,EGR1,ENDOD1,ERN1,GSN,ITPRID2,KANK1,KHLH24,NME4,PDLM7,PGM1,RARG,SLC16A1,SLC22A5,SMCO4,SWAP70,TJP2,TRIM29           |                     |
| buccladesine                                 |                | chemical toxicant                   |                            | 0.313              | 4.47E-10           | 3A5,DUSP1,EGR1,ERRF1,FAAH,FOS,FOSL1,FRRS1,FSTL3,GADD45B,GDF15,HMGCR,IGF2,IGFBP6,IRS2,JUN,KITLG,LIF,LPCAT1,MACROD1,MAT2A,MCAM,NOX1,PTGS2,PTPN2       | 515 (21)            |
| BIRC3                                        |                | enzyme                              |                            | 0.311              | 0.00108            | BIRC3,CXCL1,CXCL8,MAP3K14,MCL1,REL                                                                                                                  | 439 (16)            |
| IGF1                                         |                | growth factor                       |                            | 0.31               | 1.82E-10           | O32,FOS,FOSB,GADD45A,GATA2,GPD1,HMGR,HXA5,ID2,IFITM3,IFNGR2,IGF2,IGFBP2,IGFBP6,IRS2,JD2,JUN,KLF6,KLHL24,CLK6,LCN2,LDHA,MCL1,MDK,MYB,NOX1,PKC2,F     |                     |

Supplementary Table 4. Upstream regulator analysis based gene set enrichment analysis (GSEA) of differentially expressed genes (DEGs) after ATRA+PDT compared to PDT

| Upstream Regulator                                                        | Expr Log Ratio | Molecule Type                       | Predicted Activation State | Activation z-score | p-value of overlap | Target Molecules in Dataset                                                                                                                         | Mechanistic Network |
|---------------------------------------------------------------------------|----------------|-------------------------------------|----------------------------|--------------------|--------------------|-----------------------------------------------------------------------------------------------------------------------------------------------------|---------------------|
| TMPRSS2-ERG                                                               |                | fusion gene/product                 |                            | 0.293              | 3.23E-09           | RDC4,BBC3,CALB2,CARD6,CHAC1,DDIT4,DHRS3,DNAJA4,EREG,GDF15,HCAAR1,IFI44,IGFBP6,KLF9,MEGF6,MSLN,MYEOV,PCK2,PHLDA1,PIM1,PPARG,PSPH,ROR1,SAMD9,USF      |                     |
| TRPV4                                                                     |                | ion channel                         |                            | 0.283              | 0.0319             | AQP5,CXCL2,FAS,FOS                                                                                                                                  |                     |
| mevalonic acid                                                            |                | chemical - endogenous mammalian     |                            | 0.279              | 0.00221            | CD55,CYP2B6,GNAI1,HMGCR,PTGS2,SCARB1,SMAD3                                                                                                          | 438 (15)            |
| PHLPP1                                                                    | 0.446          | enzyme                              |                            | 0.277              | 0.00183            | CEBPD,CXCL2,CXCL3,MCL1,PRKCA                                                                                                                        | 471 (24)            |
| BAP1                                                                      |                | peptidase                           |                            | 0.277              | 0.00183            | ATF3,CCN1,CXCL2,LATS2,LIF                                                                                                                           |                     |
| AZGP1                                                                     | -0.672         | transporter                         |                            | 0.277              | 0.0078             | AZGP1,BMP4,EGR1,FBXO32,PNPLA2                                                                                                                       | 216 (7)             |
| KRAS                                                                      |                | enzyme                              |                            | 0.275              | 6.87E-25           | IF2,IGFBP2,IQGAP2,IRF1,ITGB6,ITM2B,JUN,KLF6,LAMA5,LAMC2,LCN2,LDHA,LGALS3,LIF,LIPG,LMO7,LRP8,LTBP4,MACC1,MAP1LC3B,MCAM,MPMP7,MSLN,MUC20,NOX1,1       | 470 (25)            |
| INS                                                                       |                | other                               |                            | 0.271              | 0.000135           | AMOTL2,CCN1,CPT1A,CRABP2,DUSP1,EDN1,EGR1,ERRF1,FAS,FOS,FOSB,FOSL1,HMGCR,IGFBP2,IRS2,JUN,JUND,PPARG,PTGS2,UGCG                                       | 457 (22)            |
| S-nitrosoglutathione                                                      |                | chemical toxicant                   |                            | 0.266              | 0.0158             | BIRC3,IRS2,LIF,PPARG,PTGS2,S100A10                                                                                                                  |                     |
| 2-bromoethylamine                                                         |                | chemical reagent                    |                            | 0.266              | 0.0000195          | ABCC2,ANXA1,CD44,CLUJ,ELF3,LAMC2,LCN2,LGALS3,S100A10,TNFRSF12A,TSPAN8                                                                               |                     |
| SPP1                                                                      |                | cytokine                            |                            | 0.266              | 0.0000132          | ANGPT1,AURKA,CCL15,CD44,CDC25A,CXCL1,CXCL2,CXCL3,CXCL8,FGFR2,FOS,HMGCR,INSIG1,KRT20,LIF,MMP7,NDRG2,PIK3R1,PPARG,PTGS2,RUNX2,S100A4,SC5D,TGFBF       | 427 (19)            |
| IL2RG                                                                     |                | transmembrane receptor              |                            | 0.263              | 0.0051             | BCL6,CXXC5,ETS1,FOS,IRF7,JUN,NEDD4L,TKX                                                                                                             | 451 (23)            |
| phosphate                                                                 |                | chemical - endogenous mammalian     |                            | 0.262              | 0.00131            | ACAT1,AMBP,CYP24A1,DNMT3A,ECM1,EGR1,F2R,FGFR2,FOSL1,LDHA,RUNX2,SDF2L1,ZFHX3                                                                         | 197 (13)            |
| allopurinol                                                               |                | chemical drug                       |                            | 0.261              | 0.00000115         | ABCC2,ANXA1,BIRC3,CD44,CLU,ELF3,LAMC2,LCN2,LGALS3,PSMB8,PTGS2,RCN1,REN,S100A10,TNFRSF12A,TSPAN8,TXNIP                                               | 463 (21)            |
| OGA                                                                       |                | enzyme                              |                            | 0.258              | 9.67E-14           | 5,CXCL16,CXCL8,CYP2B6,DPEP1,DST,EPHB6,FAS,FLNB,GADD45A,GALNT6,GFOD1,GNE,GSN,HIPK2,HIVEP2,HMGCR,HPGD,IFIT3,IFNGR2,IGF2,JD2,JUN,LIF,LRIG1,LSS,MCAM    | 460 (19)            |
| GATA4                                                                     |                | transcription regulator             |                            | 0.256              | 0.00019            | KN2B,CLDN1,CLDN2,CRABP2,CXCL2,CXCR4,EDN1,FOS,GATA6,GRHL3,HK1,IGFBP6,JUN,KRT7,LCN2,LDHA,NR5A2,OVOL1,PML,PPL,PTGS2,PTPRB,S100A4,SERPINA3,SERPIN       | 179 (7)             |
| PTAHR                                                                     |                | G-protein coupled receptor          |                            | 0.249              | 0.0207             | CXCL2,CXCL8,MCAM,PTGS2                                                                                                                              |                     |
| PTHLH                                                                     |                | other                               |                            | 0.248              | 0.00215            | ANGPT1,CDKN2B,CXCL8,ECM1,FOS,HSPA1A/HSPA1B,PTGS2,RGS2,RUNX2,SMPD3,VDR                                                                               | 419 (24)            |
| SP3                                                                       |                | transcription regulator             |                            | 0.247              | 0.000000079        | AMOTL2,CCN1,SGK1,STMN1,TJP1                                                                                                                         | 503 (18)            |
| 1L-6-hydroxymethyl-chiro-inositol 2-(R)-2-O-methyl-3-O-octadecylcarbonate |                | chemical - kinase inhibitor         |                            | 0.246              | 0.000101           | CXCL16,GDF15,MT2A,PPARG,PTGS2                                                                                                                       | 427 (17)            |
| EHMT1                                                                     |                | transcription regulator             |                            | 0.243              | 0.0000249          | ACSL1,ALDH2,CEBPD,EFNA1,GFOD1,ITPRIP,LCN2,LOC102724788/PRODH,MSLN,PCSK6,PPL,PRR15L,RARRS1,SAT1,SLC7A7,STRA6,TJP3                                    |                     |
| clenbuterol                                                               |                | chemical drug                       |                            | 0.243              | 0.00106            | CXCL1,FBXO32,IL1RN,SLC16A1,VDR                                                                                                                      |                     |
| TCF7L1                                                                    |                | transcription regulator             |                            | 0.243              | 0.00295            | ATF3,AXIN2,JUN,KLF4,NR5A2,PPARG                                                                                                                     | 321 (9)             |
| levodopa                                                                  |                | chemical - endogenous mammalian     |                            | 0.241              | 0.0000475          | HBEGF,IGFBP2,ITPKA,KLF6,KLF9,LAT2,LPP,MAT2A,MEIS2,MPP6,MSMO1,MXD1,MYO1B,MYORG,NEDD4L,NT5E,ONECUT2,PADI2,PGM2L1,PGPEP1,PIK3R1,PITPNM3,PLEKHA2,I      | 222 (12)            |
| TSC22D3                                                                   | 0.927          | transcription regulator             |                            | 0.239              | 0.000748           | ANXA1,BBC3,CEBPA,CXCL8,DUSP1,PPARG,PTGS2,RUNX2,SGK1                                                                                                 | 473 (25)            |
| ZBTB17                                                                    |                | transcription regulator             |                            | 0.235              | 0.0475             | CCNA2,CDKN2B,EGR1,JUN,KDM8,PMAIP1,TNFAIP2,ZFP36                                                                                                     |                     |
| PARP1                                                                     |                | enzyme                              |                            | 0.224              | 0.0392             | CASP4,CXCL1,CXCL3,FAS,FOS,GDF15,HRH1,JUN,LGALS3BP,LIF,PTGS2                                                                                         |                     |
| MAPK7                                                                     |                | kinase                              |                            | 0.22               | 3.02E-08           | ACSS2,CXCL2,CXCL3,CXCL8,DUSP1,EDN1,ELOVL6,IDI1,INSIG1,JUN,KLF4,LSS,MCL1,MSMO1,PTGS2,SQLE,STEAP4,TRAF4                                               | 426 (22)            |
| ETS1                                                                      | 0.464          | transcription regulator             |                            | 0.22               | 0.0000586          | BMP4,CAV1,CD44,CDK6,CYP24A1,EGR1,ETS1,FBXL19-AS1,HPGD,HSPA1A/HSPA1B,HSPA1A,HSPA6,IDI2,INSIG1,ITGB6,MCAM,MCL1,MMP7,MYB,PML,REN,RUNX2,SP100,TBXA1     | 508 (22)            |
| C3AR1                                                                     |                | G-protein coupled receptor          |                            | 0.218              | 0.0264             | CASP4,CD55,CXCL8,DYRK2,TGFB2,TGFB2                                                                                                                  |                     |
| chlorpromazine                                                            |                | chemical drug                       |                            | 0.218              | 0.0000393          | CYP2B6,DEPP1,FOS,HMGCR,IDI1,LSS,MSMO1,SC5D,SERPINA3,SQLE,TSC22D3                                                                                    |                     |
| indirubin                                                                 |                | chemical drug                       |                            | 0.218              | 0.0101             | BIRC3,CCN1,CYP1A1,JUN                                                                                                                               |                     |
| miR-21-5p (and other miRNAs w/seed AGCUUAAU)                              |                | mature microRNA                     |                            | 0.213              | 0.0208             | CDC25A,CDK6,FAS,GLCC1,PIK3R1,PRRG4,TGFB2,TGFB2                                                                                                      |                     |
| HTT                                                                       |                | transcription regulator             |                            | 0.211              | 0.0177             | 31,DNAJC3,DUSP5,EGR1,ETV1,FOS,FOSL1,GRIN2D,GRK5,GSN,HBEGF,HIVEP2,HMGCR,IGF2,JUN,KLF4,KLF9,LDHA,MCAM,MEIS2,NR1D2,PFKM,PPARG,PPP1R1B,PSMB8,PSMI       |                     |
| miR-204-5p (and other miRNAs w/seed UCCUUUUU)                             |                | mature microRNA                     |                            | 0.21               | 0.0000403          | ACVR1,ATP2B1,HMGA2,IDI2,PIK3R1,PPARG,SMAD3,SOX4,SPDEF,STX1A,TGFB2,TRPS1                                                                             |                     |
| ORMDL3                                                                    |                | other                               |                            | 0.2                | 0.00367            | ADAM8,CASP9,CXCL8,MAP1LC3B,OAS3                                                                                                                     |                     |
| ROR1                                                                      | 0.776          | kinase                              |                            | 0.2                | 0.0188             | AMOTL2,CCN1,SGK1,STMN1,TJP1                                                                                                                         |                     |
| daporinad                                                                 |                | chemical drug                       |                            | 0.194              | 0.000234           | ALDH1A1,CD44,FAM111B,LIF,LRIG1,RCAN1,VDR,ZNF488                                                                                                     | 319 (7)             |
| NGFR                                                                      |                | transmembrane receptor              |                            | 0.192              | 0.00655            | CCNA2,FGFR2,FOS,JUN,NR0B2,RHOB                                                                                                                      | 416 (19)            |
| cyclopamine                                                               |                | chemical reagent                    |                            | 0.187              | 0.00457            | ANGPT1,FAS,GLI1,GLI2,PTGS2,SMPD3,TJP1                                                                                                               | 332 (10)            |
| ALDH1A2                                                                   |                | enzyme                              |                            | 0.186              | 0.00414            | ALDH1A1,ALDH1A3,ATF3,BGN,CCN1,CD44                                                                                                                  | 290 (7)             |
| NR4A2                                                                     |                | ligand-dependent nuclear receptor   |                            | 0.184              | 0.0265             | CXCL8,DDC,ETV1,KITLG,PTGS2,SLC39A8,SMAD3,TSC22D3,TSM                                                                                                |                     |
| CNR1                                                                      |                | G-protein coupled receptor          |                            | 0.18               | 0.0141             | BMP4,CA9,CEACAM1,DKK1,DYRK2,ERRF1,FOS,MDK,PLD1,PLSCR1,PTGS2,SCARB1,SMURF1,TJP1                                                                      | 404 (15)            |
| glucocorticoid                                                            |                | chemical drug                       |                            | 0.17               | 0.0000777          | 'D,CLIP2,CLU,CXCL1,CXCL2,CXCL8,CXCR4,CYP24A1,CYP2B6,CYP3A5,DUSP1,EDN1,FAS,GABRP,GPR158,IL1R2,IL1RN,LAT2,MAOA,MT2A,PPARG,PTGS2,SERPINA3,SGK1,TGF     | 404 (19)            |
| MMP2                                                                      |                | peptidase                           |                            | 0.168              | 0.00839            | CD44,COL18A1,HMGCR,IL1RN,INSIG1,IRF7,PK4,SCARB1,TJP1                                                                                                | 474 (19)            |
| STK11                                                                     |                | kinase                              |                            | 0.167              | 0.0000217          | 'TP5MC1,ATP5MC3,CAMKK1,CCNA2,CEBPA,CYP2B6,EREG,FGFR2,FOSL1,GADD45A,GADD45B,GALM,GLI1,KLF12,LDHA,MCAM,NEDD9,NR1D1,NT5E,PAPSS1,PCK2,PGM1,PPAF         | 521 (22)            |
| ERG                                                                       |                | transcription regulator             |                            | 0.166              | 0.000253           | AXIN2,BIRC3,CCNA2,CXCL1,CXCL8,CXCR4,ETS1,F2R,FAM174B,FLNB,FOSB,FYN,HPGD,IRS2,LAMA5,PIM1,PLPPP3,SLC24A1,SOX4,SVIL,TGFB2,TSC22D3,WNT11                | 457 (18)            |
| panobinostat                                                              |                | chemical drug                       |                            | 0.155              | 0.013              | BBC3,CDK6,CEBPD,MCL1,PMAIP1,PPP1R1B,PTGS2                                                                                                           |                     |
| budesonide                                                                |                | chemical drug                       |                            | 0.154              | 0.0000413          | CASP9,CXCL2,CXCL8,CYP3A5,FYN,GNA14,GNAI1,JUN,KLF9,NMI,PDLIM1,PRKCA,RAP1GAP,TSC22D3                                                                  | 280 (11)            |
| BCL2L1                                                                    |                | other                               |                            | 0.154              | 0.0138             | CD44,CXCL1,CXCL3,CXCL8,ECM1,FAS,MCL1,PRAP1                                                                                                          |                     |
| GW501516                                                                  |                | chemical drug                       |                            | 0.154              | 0.00491            | ACSL1,CPT1A,CYP24A1,GPD1,IGFBP2,IGFBP6,KLK6,LIPG,PK4,PPL,SNCG,SULT2B1                                                                               | 198 (9)             |
| SLC51A                                                                    |                | transporter                         |                            | 0.152              | 0.00144            | ABCC2,CYP2B6,CYP3A5,NR0B2                                                                                                                           |                     |
| PMP22                                                                     |                | other                               |                            | 0.152              | 0.00651            | CSPG4,FLOT1,HMGCR,JUN                                                                                                                               |                     |
| LATS2                                                                     | 0.349          | kinase                              |                            | 0.152              | 0.0488             | ALDH1A3,BBC3,CCN1,CYP24A1,LATS2                                                                                                                     |                     |
| ACSL5                                                                     |                | enzyme                              |                            | 0.152              | 0.00818            | ADAMTS6,GPRC5A,MCAM,MDK                                                                                                                             |                     |
| DCAF1                                                                     |                | kinase                              |                            | 0.152              | 0.0363             | PIIF,TGM2,TOB1,TXNIP                                                                                                                                |                     |
| let-7a-5p (and other miRNAs w/seed GAGGUAG)                               |                | mature microRNA                     |                            | 0.146              | 0.00613            | AGO4,ATAD3B,CDC25A,CDK6,DOCK5,EDN1,HMGA2,CLK10,LOXL4,OTULINL,PTGS2,RHOB,S100A4,SIGMAR1,SNAP23,SPCS3,TGFB2,UGT8                                      |                     |
| ABCA1                                                                     |                | transporter                         |                            | 0.142              | 0.00213            | ANXA1,CPT1A,CXCL3,DGAT2,HMGCR,PPARG,PTGS2,SCARB1                                                                                                    | 530 (25)            |
| mir-33                                                                    |                | microRNA                            |                            | 0.139              | 0.000672           | CDK6,CEBPA,CPT1A,HMGA2,IRS2,PPARG                                                                                                                   | 79 (4)              |
| CCNC                                                                      |                | other                               |                            | 0.131              | 0.041              | CEBPA,FAS,PNPLA2,PPARG                                                                                                                              |                     |
| ADRB                                                                      |                | group                               |                            | 0.129              | 0.0000591          | ATF3,BCL10,CASP4,CCNA2,CD68,CDK6,CXCL2,DDIT4,ENDOD1,FAS,FOS,GADD45A,GDF15,IFIT3,INSIG1,JUN,KLF4,LSS,MSMO1,PTGS2,SLCO4A1                             | 496 (23)            |
| PCDH11Y                                                                   |                | other                               |                            | 0.128              | 0.000393           | AXIN2,BMP4,CD44,FOSL1,JUN,PTGS2                                                                                                                     | 289 (7)             |
| mir-22                                                                    |                | microRNA                            |                            | 0.128              | 0.0158             | CCN1,CLIP2,FOSL1,MALAT1,RGS2,TGFB2                                                                                                                  |                     |
| ATF3                                                                      | 1.18           | transcription regulator             |                            | 0.128              | 0.000182           | ATF3,AURKA,BBC3,BIRC3,CDC25A,CHAC1,CXCL1,CXCL16,GSN,HSPB1,JUN,MT2A,NFKBIZ,PPP1R15A,SRI                                                              | 511 (20)            |
| ATF6                                                                      |                | transcription regulator             |                            | 0.113              | 0.00118            | AURKA,CPT1A,DAPK1,DNAJC3,FOS,MAP1LC3B,MCL1,NR0B2,NUCB2,RCAN1                                                                                        | 428 (17)            |
| CNTF                                                                      |                | cytokine                            |                            | 0.105              | 0.00727            | CEBPD,CXCL8,EGR1,FOS,IRF1,LIF,PPP1R1B,SERPINA3,SLC16A1,ZFP36                                                                                        | 492 (21)            |
| ANXA2                                                                     |                | other                               |                            | 0.104              | 0.00112            | CDK6,FAS,GADD45A,JUN,PTGS2,S100A10,SESN2                                                                                                            | 452 (20)            |
| Calcineurin protein(s)                                                    |                | complex                             |                            | 0.103              | 0.000814           | AQP5,CBLB,CXCL3,CXCL8,DUSP1,EGR1,FOS,PTGS2,RCAN1,RGS2,RNF128                                                                                        | 436 (21)            |
| CYP19A1                                                                   |                | enzyme                              |                            | 0.103              | 0.0279             | B3GNT5,CD44,CLCF1,HLA-E,JUN,NR5A2,PPARG,S100A10,SCARB1,STEAP4                                                                                       |                     |
| MLX                                                                       |                | transcription regulator             |                            | 0.094              | 0.000293           | ARRDC4,ELOVL6,IGF2,IL1RN,LGALS3BP,TXNIP                                                                                                             |                     |
| ETV5                                                                      |                | transcription regulator             |                            | 0.093              | 0.00000287         | ALCAM,AQP5,CAV1,CLDN1,CLIC5,CXCR4,KRT13,KRT7,KRT80,LCN2,LGALS3,LMOT,MYB,S100A14,SCARB1,TINAGL1,TJP1,TJP2,TJP3                                       | 153 (6)             |
| SLC9A3R1                                                                  |                | other                               |                            | 0.092              | 0.0207             | ABCC2,CFTR,S100A4,SCARB1                                                                                                                            |                     |
| rifampin                                                                  |                | chemical drug                       |                            | 0.086              | 1.71E-09           | ,ALDH1A1,ATP2B1,AXIN2,CEACAM5,CEACAM6,CEP135,CEP70,CYP1A1,CYP24A1,CYP2B6,CYP3A5,ELOVL6,GATA6,MAOB,ME1,MYB,NR0B2,PADI2,PCK2,SLC39A10,TBC1D9,TM       | 480 (18)            |
| PAX3-FOXO1                                                                |                | fusion gene/product                 |                            | 0.084              | 0.00509            | XA1,ARHGDI8,AURKA,CCN1,CDKN2B,CEP41,CXCR4,DAPK1,DUSP1,FGFR2,FOSL1,GPRC5A,HSPA1A/HSPA1B,IGF2,IGFBP2,MCAM,MT1X,SDCCAG8,SLC16A1,SMAD3,SPHK2,SI         | 394 (7)             |
| RBPJ                                                                      |                | transcription regulator             |                            | 0.083              | 0.00139            | AXIN2,CD44,DUSP1,ETS1,FOS,GNAI1,IGF2,JUN,KITLG,LIF,MDK,MI2,MUC2,PRKAR2A,REN,SOX4,TGFB2                                                              | 451 (22)            |
| SOX11                                                                     |                | transcription regulator             |                            | 0.081              | 0.00141            | ADAM9,BMP4,BTNL9,CAV1,CD58,CXCR4,EGR1,FAS,IFIH1,KLK6,LGALS9,MYO1B,PAG1,RUNX2,SKAP2,SMAD3                                                            |                     |
| cinnamaldehyde                                                            |                | chemical toxicant                   |                            | 0.075              | 0.00000515         | CPT1A,CXCL8,DDIT4,EGR1,FGFR2,FOS,HSPA1A/HSPA1B,INSIG1,JUN,PK4,PNPLA2,PPARG,PPP1R10,PTGS2,SLC2A12,TXNIP                                              | 497 (20)            |
| benzyl isothiocyanate                                                     |                | chemical - endogenous non-mammalian |                            | 0.07               | 0.0488             | FOS,MCL1,PTGS2,ZBTB10,ZBTB4                                                                                                                         |                     |
| tacrolimus                                                                |                | chemical drug                       |                            | 0.069              | 0.000637           | ABLIM1,ANGPT1,CALB2,CASP7,CEBPA,CXCL2,CXCL8,CXCR4,DAPK1,EDN1,EGR1,ETV1,F5,FOS,FOSB,IL1R2,JUN,MARF1,NRP1,NT5E,PTGS2,RCN1,RUNX2,TJP1,TNFRSF12A        | 444 (19)            |
| lovastatin                                                                |                | chemical drug                       |                            | 0.066              | 0.00218            | ATF3,CCNA2,COTL1,GNPAT,HMGCR,IRF1,KLF4,LIF,MCL1,MPP6,PTGS2,RHOB,RHOV,SDC4,SMAD3,TFPI                                                                | 493 (19)            |
| RARA                                                                      |                | ligand-dependent nuclear receptor   |                            | 0.065              | 9.22E-14           | :2F7,EGR1,EIF5A2,FOS,FUT4,GDF15,GLI1,GPR158,HLA-B,HLA-C,HLA-D,HOXA3,HOXA5,IFI44,IGFBP6,IRF1,JUN,KLF4,KRT20,LGALS3BP,MAOB,MUC20,MXD4,NCOA3,NEDD9,NRF | 444 (22)            |
| brefeldin A                                                               |                | chemical - endogenous non-mammalian |                            | 0.063              | 0.000185           | BBC3,CD44,CXCL3,GADD45B,HLA-B,HLA-C,KLF4,PTGS2,SESN2,SLC38A5                                                                                        | 479 (22)            |
| NANOG                                                                     |                | transcription regulator             |                            | 0.061              | 0.00437            | AMER1,CDC25A,CDK6,EGR1,FOS,FOSB,GATA6,GLI1,HSPA1A/HSPA1B,IERSL,KLF4,NRP1,TOB1,ZFHX3                                                                 | 401 (10)            |
| dexamethasone                                                             |                | chemical drug                       |                            | 0.06               | 3.66E-33           | DEPP1,DEXI,DGAT2,DNAJC3,DST,DUSP1,DUSP16,DUSP5,DYRK2,EDN1,EFNA1,EGR1,EHF,ELOVL6,EREG,ERRF1,F2RL1,F5,FBXO32,FLNB,FOS,FOSB,FOSL1,FSTL3,GAB1,GA        | 559 (23)            |
| CD28                                                                      |                | transmembrane receptor              |                            | 0.058              | 0.00148            | .B,CDK6,CLK1,CXCL2,CXCL8,CXCR4,FOS,FYN,GLI1,HSPA1A/HSPA1B,IGFBP6,IL15RA,IRF1,JUN,LDHA,MSLN,PRDX4,PTGS2,REL,RNF128,SEC61B,SLC16A3,SRPRB,STEAP2,TA    | 363 (17)            |
| MAP3K7                                                                    |                | kinase                              |                            | 0.057              | 0.000444           | BIRC3,CXCL2,CXCL8,IFI44,IFIH1,IFIT3,IRF1,IRF7,JUN,MUC2,PTGS2,RGS2                                                                                   | 293 (18)            |
| dextran sulfate                                                           |                | chemical drug                       |                            | 0.051              | 0.000217           | (A,BMP4,CCNA2,CCNF,COL18A1,CXCL2,CXCL3,CXCL8,E2F7,ENG,ERCC8L,FANCF,FIGLN1,HUJRP,IFITM3,IRF7,NOX1,NRP1,PTGS2,REN,SOX12,STEAP3,STMN1,TGFB2,TGFBF      | 464 (18)            |
| beta-estradiol                                                            |                | chemical - endogenous mammalian     |                            | 0.035              | 8.45E-46           | ECE2,EDN1,EFNA1,EGR1,ELF3,EMP1,EREG,ERRF1,ETS1,ETV1,F2R,F2RL1,F5,FAAH,FAM182A,FAM3D,FAS,FEZ2,FGFR2,FHL2,FLNB,FLOT1,FOS,FOSB,FOSL1,FRMD4B,FUT8,F     | 636 (22)            |
| CEBPA                                                                     | -0.415         | transcription regulator             |                            | 0.028              | 8.68E-11           | CXCR4,CYP2B6,CYP3A5,DGAT2,EEF1A2,FOS,GADD45A,GATA2,GATA6,GLI1,GRHL3,H1-10,HLA-B,HMGCR,HPGD,IDI2,IL1RN,IRS2,JUN,KLF4,KRT7,LCN2,MT2A,NR5A2,NRP1,OV    | 516 (22)            |
| cyclosporin A                                                             |                | biologic drug                       |                            | 0.027              | 1.32E-09           | XCR4,CYP3A5,DDIT4,DEXI,EDN1,EGR1,ELF3,F5,FAS,FOS,FOSB,FYN,HMGCR,HNF4A,IQGAP2,ITGB6,ITPR2,JUN,LAMC2,LCN2,LGALS3,MARF1,MUC2,PRKCA,PSMB10,PSMB8,P1     | 503 (19)            |
| MEN1                                                                      |                | transcription regulator             |                            | 0.027              | 0.00846            | CDKN2B,FOS,GLI1,IGFBP2,IRS2,RUNX2,TGFB2                                                                                                             | 426 (19)            |
| cobalt chloride                                                           |                | chemical reagent                    |                            | 0.021              | 0.0000147          | ABCB10,BBC3,CA9,CLU,COL18A1,CXCL8,CXCR4,CYP1A1,DDIT4,DUSP1,MCL1,PTGS2,SORL1,TJP1,VDAC1                                                              | 430 (18)            |
| TO-901317                                                                 |                | chemical reagent                    |                            | 0.019              | 0.000017           | 2,ASS1,CASP4,CASP7,CPT1A,CYP3A5,DDC,ELOVL6,GPD1,HMGCS2,LGALS3,LIPG,MRPS2,NR0B2,NR1D1,NR5A2,PPARG,PSMB8,PSME1,PTGS2,PSXMP2,SCARB1,SERPINA3,SI        | 497 (22)            |
| miR-29b-3p (and other miRNAs w/seed AGCACCA)                              |                | mature microRNA                     |                            | 0.019              | 0.000119           | CAV2,CDK6,DNMT3A,DUSP2,INSIG1,KLF4,LOXL4,MCL1,PIK3R1,TGFB2,TUBB2A,ZFP36L1                                                                           |                     |
| RXRA                                                                      |                | ligand-dependent nuclear receptor   |                            | 0.014              | 9.54E-11           | IA,CRABP2,CTSS,CYP24A1,CYP2B6,CYP3A5,ECM1,ENG,FGF19,FLRT3,FOS,GPD1,HBEGF,HMGCS2,HNF4A,IGFBP6,INSIG1,KLF9,LCN2,MAOB,NEDD9,NR0B2,NR1D1,NR5A2,PCI      | 571 (27)            |
| medroxyprogesterone acetate                                               |                | chemical drug                       |                            | 0                  | 3.13E-09           | 368,CDK6,CDKN2B,CEBPA,CKB,CLDN1,CXCR4,CYP1A1,DKK1,ETS1,F2R,FAS,FLNB,FOSL1,FUT8,FYN,GLI1,GSN,HESE6,IDI2,IFI35,IGF2,IQGAP2,JUN,LGMN,LIF,MAOA,MAOB,MMP | 553 (18)            |
| puromycin                                                                 |                | chemical - endogenous non-mammalian |                            | 0                  | 0.0148             | ABCC1,CYP1A1,CYP2B6,CYP3A5                                                                                                                          |                     |
| FKBP4                                                                     |                | enzyme                              |                            | 0                  |                    |                                                                                                                                                     |                     |



Supplementary Table 4. Upstream regulator analysis based gene set enrichment analysis (GSEA) of differentially expressed genes (DEGs) after ATRA+PDT compared to PDT

| Upstream Regulator                            | Expr Log Ratio | Molecule Type                     | Predicted Activation State | Activation z-score | p-value of overlap | Target Molecules in Dataset                                                                                                                                                      | Mechanistic Network |
|-----------------------------------------------|----------------|-----------------------------------|----------------------------|--------------------|--------------------|----------------------------------------------------------------------------------------------------------------------------------------------------------------------------------|---------------------|
| lysophosphatidylcholine                       |                | chemical - other                  |                            | -0.296             | 0.000488           | CXCL1, CXCL8, EGR1, HBEGF, HMGCR, INSIG1, JUN, LSS, MSMO1, PPARG, RGS2, SCARB1, S100A4, SCEL, SDF2L1, SLC16A3, SLC39A8;                                                          | 418 (19)            |
| Gsk3                                          |                | group                             |                            | -0.296             | 0.00176            | BBC3, CEBA, CXCL8, FOS, FOSB, GDF15, HMGCR, JUN, MYB, PPARG, PTGS2                                                                                                               | 497 (22)            |
| CD38                                          |                | enzyme                            |                            | -0.299             | 0.00000309         | ATP1B1, BCL6, CD44, EGN1, IL1R2, LGALS3, LMO7, MYADM, NABP1, NTSE, PDLIM1, PGM1, PIM1, PKIB, PRDX4, RAP1GAP, RBPMS, S100A4, SCEL, SDF2L1, SLC16A3, SLC39A8;                      | 508 (26)            |
| Y 27632                                       |                | chemical drug                     |                            | -0.306             | 0.00115            | AMOTL2, BBC3, BMP4, CCN1, CD44, CDKN2B, CEBA, FOS, PPARG, PTGS2, TJP1                                                                                                            | 496 (20)            |
| berberine                                     |                | chemical drug                     |                            | -0.31              | 0.0015             | BIRC3, CASP7, CASP9, CPT1A, CXCL8, CYP1A1, CYP2B6, CYP3A5, HMGCR, MCL1, PPARG, PTGS2, SAT1, SCARB1                                                                               | 481 (23)            |
| BMP7                                          |                | growth factor                     |                            | -0.31              | 0.0000254          | ACVR1, BMP4, CAV2, CD44, CEBA, CECPD, CXCL8, DKK1, EDN1, EREG, ID2, IGFBP6, IL1RN, KLF4, PCSK6, PIK3R1, PPARG, RGS2, RUNX2, S100A4, SOSTDC1, WNT11                               | 386 (16)            |
| mir-148                                       |                | microRNA                          |                            | -0.312             | 0.041              | ALCAM, EGR1, MMP15, TGFB2                                                                                                                                                        | 489 (22)            |
| CFTR                                          | -0.375         | ion channel                       |                            | -0.323             | 0.000215           | ACAA1, CFTR, CXCL3, CXCL8, CYP2B6, CYP3A5, FAAH, FAS, HPGD, ID1, NFKBIZ, PTGS2, S100A4, SOSTDC1, WNT11                                                                           | 489 (22)            |
| S100A9                                        |                | other                             |                            | -0.325             | 0.00026            | AKAP12, ALDH1A1, ATF3, BACE2, BCL3, CXCL3, CXCL8, DDC, DDIT4, EFNA1, FAS, FOSL1, GJB2, GPRC5A, LOC102724788/PRODH, PHLDA1, PLK3, SEMA3B, SGK1, TXNIP                             | 489 (22)            |
| STAT5A                                        |                | transcription regulator           |                            | -0.328             | 2.97E-18           | IS, FOSB, GADD45A, GASK1B, GRHL3, ID2, IFITM2, IRF1, KRT20, KRT80, LCN2, MCL1, MMP7, MUC13, MUC20, PIM1, PLAAT4, PPARG, PPF1BP2, PRR15L, PSMB8, QPCT, RAB27B, RUNX2, SBT         | 481 (21)            |
| HIF1                                          |                | complex                           |                            | -0.329             | 0.0109             | C9, CCNG2, CXCR4, DDIT4, EDN1, LDHA, SLC16A1, SLC16A3, TFF3                                                                                                                      |                     |
| SOX7                                          |                | transcription regulator           |                            | -0.333             | 0.0015             | CRABP2, EFNA1, ENG, GRHL3, HSPG2, KRT7, OVOL1, PPL, PRKCA, SOX4                                                                                                                  |                     |
| FLT1                                          |                | kinase                            |                            | -0.333             | 0.0202             | DEPP1, FOS, HK1, HLA-B, MAT2A, NRP1, SNAP23, TGFB2, VDAC1                                                                                                                        |                     |
| CBFB                                          |                | transcription regulator           |                            | -0.342             | 0.0302             | CEBA, ITGB6, KCNK5, LGALS3BP, LGMN, NRP1, PPARG, RUNX2, TGFB2                                                                                                                    |                     |
| hemin                                         |                | chemical - endogenous mammalian   |                            | -0.342             | 0.0457             | ACO1, AKR1C1/AKR1C2, CD68, CXCL8, HDAC9, JUN, NFYA, PROCR, PTGS2                                                                                                                 |                     |
| RASSF1                                        |                | other                             |                            | -0.345             | 7.38E-12           | ALDH1A1, CASP4, CAV1, CAV2, CCNA2, CLU, CRABP2, CXCR4, DKK1, EGR1, EMP1, FOS, FRMD4B, GDF15, GSN, HBEGF, KLF4, LIF, MDK, MTUS1, PROS1, PTGS2, TGM2, TUBB2A                       | 446 (18)            |
| tempol                                        |                | chemical drug                     |                            | -0.346             | 0.00984            | BMP4, CXCL2, CXCL8, NOX1, PTGS2, SGK1                                                                                                                                            | 415 (24)            |
| Insulin                                       |                | group                             |                            | -0.35              | 0.00000656         | T4, DGAT2, DNAJB4, DUSP1, EDN1, EGR1, ELOVL6, ERRF1, FBXO32, FER, FOS, FOSB, HMGCR, HNF4A, IFIT3, IGFBP2, INSIG1, IRF7, IRS2, JUN, KLF4, LDHA, LGALS3BP, MAOA, MAOI              | 378 (21)            |
| FOXA1                                         |                | transcription regulator           |                            | -0.356             | 0.00352            | AGR2, ANXA1, CD58, CFTR, COL18A1, CXCL8, DDC, DDIT4, HK1, HNF4A, HNF4G, MUC2, NR1P1, S100A2, SPDEF, TFF3, TNFRSF12A                                                              | 357 (11)            |
| TGFBR2                                        | -0.513         | kinase                            |                            | -0.357             | 0.0000218          | N, CD44, CDKN2B, CLU, CXCL2, DYRK2, GADD45B, GJB2, GLI1, GLI2, HPGD, IL1R2, JUN, MUC2, MYOF, NRP1, PTGS2, RUNX2, SLC12A4, SMAD3, TBXAS1, TGFB2, TGFB2, TNFRSF12A, TXI            | 470 (18)            |
| ERBB2                                         |                | kinase                            |                            | -0.359             | 4.93E-17           | iCR, HSPA1A/HSPA1B, HSPB1, ID2, IDI1, IGFBP2, ITGB6, ITPR2, JAG2, JUN, KLF4, KRT7, LAMC2, LCN2, LDHA, LGALS3, LPCAT1, LSS, LTBP3, MACE1, MAOA, MCL1, MMP7, MSLN, NEDI            | 344 (22)            |
| FOSB                                          | 0.826          | transcription regulator           |                            | -0.37              | 0.0000566          | CEBA, FOS, FOSB, FOSL1, HPGD, MT2A, PPARG, RUNX2, SMAD3                                                                                                                          | 347 (15)            |
| cigitazone                                    |                | chemical drug                     |                            | -0.372             | 0.000872           | CAV1, CAV2, CXCL1, CXCL8, GPD1, GSN, LCN2, MKD1, NOX1, PPARG, PTGS2, SULT2B1                                                                                                     | 427 (22)            |
| PGR                                           |                | ligand-dependent nuclear receptor |                            | -0.373             | 1.22E-16           | IST, EDN1, F2RL1, FOS, GPR160, GPRC5A, HBEGF, HPGD, IFI35, IFI44, IFI3, IRF7, IRS2, KLF4, KLF9, MAT2A, MBOAT7, MTS1, NEDD9, NPC1, NQO2, OAS3, PDLIM1, PHF21A, PPARG, PPIF, F     | 566 (24)            |
| IgG                                           |                | complex                           |                            | -0.375             | 9.03E-11           | , CRABP2, CXCL8, DUSP1, EDN1, EGR1, EMP1, FOSB, GPRC5A, GUK1, HLA-E, HSPB1, IFIH1, IFITM3, IL1RN, JUND, KLF6, KRT13, LCN2, LGALS3, PIM1, PPIF, PPL, PPP1R15A, PTGS2, RND3,       | 507 (22)            |
| HDL-cholesterol                               |                | complex                           |                            | -0.378             | 0.00189            | CHAC1, EGR1, ID1, KHL24, MSMO1, SLC3A1, S100A4, SOSTDC1, WNT11                                                                                                                   |                     |
| PPARδ                                         |                | ligand-dependent nuclear receptor |                            | -0.382             | 0.000848           | A1, ALDH2, ASS1, CD68, CPT1A, CYP2B6, GPD1, HMGCS2, IGFBP2, IGFBP6, KLF6, LDHA, LGALS4, LIPG, PCSK6, PDK4, PNPLA2, PPARG, PTGS2, RUNX2, SAT1, SORD, TFF3, TNFRSF12A, I           | 363 (19)            |
| gefitinib                                     |                | chemical drug                     |                            | -0.387             | 0.000476           | ALDH1A1, AURKA, CCNF, CECPD, CXCL2, CXCL8, EFN1, FGF2, FOSL1, GADD45B, GLI1, HSPB1, IL1R2, MAFF, MAP4K4, MMP15, PPARG, PTGS2, RHOB, S100A14                                      | 459 (23)            |
| KN-62                                         |                | chemical - kinase inhibitor       |                            | -0.396             | 0.0000232          | AQP5, ATF3, CXCL8, CYP3A5, EGR1, HNF4A, PPARG, PPP1R15A, PTGS2                                                                                                                   | 481 (21)            |
| ADCYAP1                                       |                | other                             |                            | -0.401             | 0.0000488          | , BCAM, CCNA2, CECPD, CLCF1, CXCL2, CXCL3, DNMT3A, EGR1, EPHA2, FGF2, FOS, FRRS1, GLI1, GRK5, HK1, IRF1, MCAM, PPP1R3B, RHOB, S100A10, SCARB1, SERPINE3, SERPINE2, I             | 561 (22)            |
| NPPA                                          |                | other                             |                            | -0.401             | 0.0165             | DUSP1, EDN1, EGR1, MCL1, PTGS2                                                                                                                                                   |                     |
| celecoxib                                     |                | chemical drug                     |                            | -0.405             | 0.00353            | CD68, CYP3A5, DNAJB9, FAS, FOS, GADD45A, GDF15, MCL1, MUC2, PPARG, PTGS2, ST3GAL4, TGFB2, TRAF4                                                                                  | 423 (18)            |
| MYRF                                          |                | transcription regulator           |                            | -0.427             | 0.00636            | AKR1C3, AMOTL2, CEACAM1, GDF15, LOXL4, PARP10, PDK4, RASSF6, RHOU                                                                                                                |                     |
| NCOR1                                         |                | transcription regulator           |                            | -0.436             | 0.00000206         | AZGP1, BCL3, CCNA2, CEBA, CYP3A5, DUSP1, FXYP3, HK1, ME1, MT1X, NR1D1, PDE9A, PDK4, PPARG, PTGS2, SORD, SPINK1, STEAP2, STK39                                                    | 492 (20)            |
| miR-291a-3p (and other miRNAs w/sead AAGUGCU) |                | mature microRNA                   |                            | -0.438             | 0.0483             | ADAM9, ANKRD13B, CD44, DKK1, GBP3, LATS2, TBC1D2, TGFB2, TRPS1                                                                                                                   |                     |
| interferon alfacon-1                          |                | biologic drug                     |                            | -0.447             | 0.0268             | CXCL8, HIPK2, IL1R2, MAFF, PARP14                                                                                                                                                |                     |
| xanthohumol                                   |                | chemical drug                     |                            | -0.447             | 0.00863            | ANXA1, BIRC3, DGAT2, FOS, GAB2, RUNX2                                                                                                                                            | 193 (7)             |
| SETD2                                         |                | enzyme                            |                            | -0.447             | 0.0268             | CAV1, CCN1, ENG, JUN, RHOB                                                                                                                                                       |                     |
| HOXD10                                        |                | transcription regulator           |                            | -0.447             | 0.00092            | CD44, CEACAM1, DAPP1, HBEGF, MAOB, RAB40B, REN, RHOB, TFF1, TJP1                                                                                                                 |                     |
| EED                                           |                | transcription regulator           |                            | -0.447             | 0.00457            | GATA6, IGFBP2, KLF4, MMP7, PTGS2, RUNX2, SLC26A6                                                                                                                                 |                     |
| BGN                                           | -1.301         | other                             |                            | -0.447             | 0.00919            | AXIN2, CXCL3, CXCL8, RUNX2, SMAD3                                                                                                                                                | 481 (19)            |
| MED13                                         |                | transcription regulator           |                            | -0.447             | 0.024              | ELOVL6, GPD1, HMGCR, KITLG, LIF, PPARG                                                                                                                                           |                     |
| SGK1                                          | -0.361         | kinase                            |                            | -0.447             | 0.0422             | ASIC1, CDK6, CEBA, CFTR, HBEGF, LIF, PPARG                                                                                                                                       |                     |
| amiodarone                                    |                | chemical drug                     |                            | -0.447             | 0.0016             | AK4, CXCL8, CYP1A1, LSS, ME1, NDRG2, PPARG                                                                                                                                       |                     |
| SB 290157                                     |                | chemical reagent                  |                            | -0.447             | 0.00546            | BMP4, CASP4, CXCL2, CXCL3, PTGS2                                                                                                                                                 |                     |
| 2-methoxyestradiol                            |                | chemical - endogenous mammalian   |                            | -0.452             | 0.00592            | ATF3, CAV1, CXCR4, LOC102724788/PRODH, MCL1, PTGS2, SERPINE2                                                                                                                     | 466 (17)            |
| GW3965                                        |                | chemical reagent                  |                            | -0.453             | 0.00243            | CAV1, CCNA2, CXCL8, DGAT2, DUSP1, GNAI1, IL1RN, NR1D1, NR5A2, PDK4, PKIB, PPP1R15A, PTGS2, SC5D                                                                                  | 506 (24)            |
| genistein                                     |                | chemical drug                     |                            | -0.456             | 0.00000126         | CL3, CXCL8, CYP1A1, DKK1, DUSP1, EREG, FOS, GDF15, GJB2, GLI1, HMGCR, HPGD, HSPA1A/HSPA1B, ID2, IRF7, JUN, JUND, LGMN, MAOA, MUC2, MYB, NOX1, NPC1, PIK3R1, PIM1, PKIB, P        | 591 (20)            |
| ACOX1                                         |                | enzyme                            |                            | -0.457             | 0.00000038         | , ER2, ACSL1, CTSE, DPP4, GADD45A, IGFBP2, KLF6, LCN2, LGALS3, LGALS3BP, PDK4, PEX11A, PHLDA1, PLSCR1, PXMP2, QPCT, RGS2, SERPINA1, SGK1, SLC16A1, SLC4A4, TM4SF4, U             | 180 (7)             |
| spironolactone                                |                | chemical drug                     |                            | -0.458             | 0.0283             | ABCC2, BMP4, CXCR4, CYP3A5, EDN1, LGALS3, PPARG, PTGS2, REN                                                                                                                      |                     |
| EIF4EBP1                                      |                | transcription regulator           |                            | -0.462             | 0.0000607          | BBC3, CEBA, CECPD, EGR1, IL1RN, IRF7, PHLPP1, PNPLA2, PPARG, PTGS2                                                                                                               | 400 (12)            |
| indole-3-carbinol                             |                | chemical drug                     |                            | -0.462             | 0.0268             | ANXA1, CDK6, CYP3A5, FOS, GDF15                                                                                                                                                  |                     |
| tributyltin                                   |                | chemical reagent                  |                            | -0.463             | 0.000043           | ACSL1, ASS1, ATP5MC1, CEBA, DGAT2, ELOVL6, F2RL1, GPRC5A, IFIT3, IRF7, KRT80, LDHA, PDK4, PPARG, PPL, SLC04A1, SNTB1, WNK4                                                       | 387 (12)            |
| tanepimycin                                   |                | chemical drug                     |                            | -0.473             | 0.00152            | BIRC3, CAV1, CDK6, CDKN2B, CXCL8, DNAJB1, FAS, HMGCR, HRH1, HSPA1A/HSPA1B, JUN, LDHA, MCL1, POLR2L, SERPINH1                                                                     | 503 (22)            |
| resveratrol                                   |                | chemical drug                     |                            | -0.475             | 0.0000678          | 1A, CXCL2, CXCL3, CXCL8, CYP1A1, DAPK1, EDN1, EGN1, EGR1, FAS, FOS, FOSL1, GDF15, GLI1, HMGCR, IGFBP2, JUN, JUND, KRT20, MALAT1, MCL1, NOX1, NR1P1, PDK4, PPARG, PPP1R15         | 463 (21)            |
| GSTO1                                         |                | enzyme                            |                            | -0.48              | 0.00000424         | CELSR1, CHAC1, FUT8, LAMA5, LMO7, MTUS1, NPDC1, OAS3, PKIB, SAMD9, SAT1, SEMA3A, SFLN5, SOX4, ZFP36L1                                                                            |                     |
| FGFR2                                         | 0.626          | kinase                            |                            | -0.489             | 0.000812           | BMP4, DKK1, FAS, FGF2, FLRT3, GASK1B, GATA6, ID2, IGFBP2, NOSTRIN, NR5A2, PLXNB2, RUNX2, SPINK1, TRPS1, TSPAN8                                                                   | 473 (12)            |
| ursodeoxycholic acid                          |                | chemical - endogenous mammalian   |                            | -0.499             | 0.00427            | ABCC2, CYP1A1, CYP2B6, ELF3, GLI1, LGALS3, PTGS2, TGFB2, VDR                                                                                                                     | 496 (14)            |
| mir-21                                        |                | microRNA                          |                            | -0.502             | 0.013              | CARD6, CASP4, CCNA2, CDC25A, CDK6, CDKN2B, CLU, CXCL2, FAS, GBP3, GLCCI1, HMG2, IRF1, NPAS2, OAS3, PRRG4, PSME2, RHOB, SSR1, STMN1, TBC1D1, TGFB2, TRMT10C                       |                     |
| ADORA2A                                       |                | G-protein coupled receptor        |                            | -0.508             | 0.00839            | ATP2B1, CKB, CXCL2, DGAT2, DUSP1, FOS, GLI1, IFITM3, PMPCA, PPP1R1B, PTGS2, TJP1, TSC22D3, TUBB2A                                                                                | 363 (19)            |
| SRC (family)                                  |                | group                             |                            | -0.518             | 0.00454            | CYP1A1, EGR1, MAOA, MCL1, NOX1, PTGS2, S100A4, TJP1                                                                                                                              | 464 (19)            |
| caffeic acid phenethyl ester                  |                | chemical drug                     |                            | -0.532             | 0.00241            | ABCB10, BIRC3, CD44, CXCL3, CXCL8, EGR1, HSPB1, IGFBP6, KLF6, MUC2, PLD1, PTGS2, RHOB                                                                                            | 441 (18)            |
| ADIPOQ                                        |                | other                             |                            | -0.538             | 0.0124             | ACSL1, BCL3, CEBA, CXCL1, CXCL2, CXCL3, CXCL8, DUSP1, EGR1, FOS, GPD1, HBEGF, HMGCS2, HNF4A, PPARG, PTGS2, RUNX2                                                                 |                     |
| glucagon                                      |                | biologic drug                     |                            | -0.552             | 0.0017             | ESAM, FOS, IRS2, LIMA1, NDRG2, PPP1R1B, RAP1GAP, SEC81B, TJP2                                                                                                                    |                     |
| DL-fructose                                   |                | chemical - endogenous mammalian   |                            | -0.555             | 0.0241             | BBC3, ELOVL6, GPD1, TXNIP                                                                                                                                                        |                     |
| SIAH2                                         |                | transcription regulator           |                            | -0.562             | 0.0000888          | AKR1C3, ANGPT1, CYP24A1, EGN1, FXYP3, MT1X, PDE9A, PLK3, STEAP2                                                                                                                  | 422 (11)            |
| CITED2                                        |                | transcription regulator           |                            | -0.562             | 0.0196             | CDKN2B, CXCL1, CXCL8, DUSP1, GATA6, TGM2                                                                                                                                         |                     |
| GW7647                                        |                | chemical drug                     |                            | -0.57              | 0.000193           | ABCC1, CPT1A, IGFBP2, IGFBP6, NPC1, PDK4, SLC22A5                                                                                                                                | 211 (11)            |
| EIF4EBP2                                      |                | transcription regulator           |                            | -0.572             | 0.0000823          | CEBA, CECPD, EGR1, IL1RN, IRF7, PNPLA2, PPARG, PTGS2                                                                                                                             | 254 (7)             |
| FGF21                                         |                | growth factor                     |                            | -0.577             | 0.000468           | CPT1A, DGAT2, EGR1, ERN1, FGF2, FOS, HMGCS2, IRS2, ME1, PDK4                                                                                                                     | 503 (24)            |
| colistin                                      |                | biologic drug                     |                            | -0.577             | 0.00714            | ALCAM, BMP4, DNAJB4, FOS, LGALS3, MYO1B, NPNT, NR1P1, SLC04A1, SMAD3, SOX4, TJP1                                                                                                 |                     |
| BHLHA15                                       |                | transcription regulator           |                            | -0.577             | 0.00651            | ARRDC3, CLU, GJB2, RAB3D                                                                                                                                                         |                     |
| kanamycin A                                   |                | chemical drug                     |                            | -0.577             | 0.00822            | ALCAM, BMP4, DNAJB4, FOS, LGALS3, MYO1B, NPNT, NR1P1, SLC04A1, SMAD3, SOX4, TJP1                                                                                                 |                     |
| metronidazole                                 |                | chemical drug                     |                            | -0.577             | 0.0115             | ALCAM, BMP4, DNAJB4, FOS, LGALS3, MYO1B, NPNT, NR1P1, SLC04A1, SMAD3, SOX4, TJP1                                                                                                 |                     |
| IGF2BP1                                       |                | transcription regulator           |                            | -0.577             | 0.00565            | AXIN2, CD44, GADD45A, GLI1, IGFBP2, SERPINH1                                                                                                                                     |                     |
| SOX9                                          |                | transcription regulator           |                            | -0.581             | 0.00171            | CEACAM5, CXCR4, FOS, MMP15, MUC2, PPARG, PRKCA, RUNX2, S100A4, SMPD3, SOSTDC1, SOX4, WNT11                                                                                       | 478 (23)            |
| ATG7                                          |                | enzyme                            |                            | -0.584             | 0.0000868          | ACAT1, ACSL1, AGR2, CASP7, CD44, CXCL8, HK1, IFIH1, PDLIM1, RCAN1, S100A4, SCARB1, TGFB2                                                                                         | 444 (16)            |
| obeticholic acid                              |                | chemical drug                     |                            | -0.588             | 0.000399           | ABCC2, CD68, CEBA, CXCL2, CXCL3, FGF19, NR0B2, PPARG, PTGS2                                                                                                                      | 541 (18)            |
| KLF15                                         |                | transcription regulator           |                            | -0.589             | 0.029              | ACAT1, ACSL1, DGAT2, PDK4, PPARG, PXMP2                                                                                                                                          |                     |
| PTPN1                                         |                | phosphatase                       |                            | -0.592             | 0.00454            | CXCL2, CXCL3, DUSP1, DUSP2, IRS2, NOX1, PIK3R1, RASA1                                                                                                                            | 435 (20)            |
| CTNNB1                                        |                | transcription regulator           |                            | -0.6               | 1.46E-15           | IS, FOS, FOSL1, FSTL3, GADD45B, GDM, GATA2, GDF15, GJB2, GLI1, GLI2, HBEGF, HMGCR, HMGCS2, HNF4A, HOXA5, ID2, IDI1, IGFBP2, JUN, KITLG, KRT7, LAMC2, LGALS3, LIF, MAC            | 561 (20)            |
| CREBZF                                        |                | transcription regulator           |                            | -0.6               | 0.00183            | DNAJB9, ERN1, HSPA1A/HSPA1B, INSIG1, PDK4                                                                                                                                        |                     |
| IL4                                           |                | cytokine                          |                            | -0.604             | 1.14E-14           | , HPGD, HRH1, HSPA1A/HSPA1B, IFI44, IFIH1, IFIT3, IFITM3, IFNGR2, IL15RA, IL1R2, IL1RN, IMPD1, IRF1, IRF7, JUN, JUND, KDM6B, KITLG, KLF6, LGALS3, LGALS3BP, LIF, LIPG, LMO7, MAC | 509 (19)            |
| IKZF3                                         |                | transcription regulator           |                            | -0.607             | 0.0000438          | CAV1, CAV2, CD68, DEPP1, DKK1, IFIT3, IRF7, KLF4, NFKBIZ, PROS1, RNFB2, S100A16, SIPA1L2, SMAD3                                                                                  |                     |
| estrogen receptor                             |                | group                             |                            | -0.608             | 2.07E-11           | , CXCL8, CXCR4, CYP1A1, CYP2B6, EDN1, EGR1, EREG, ETS1, FGF2, FOS, HBEGF, HSPA1A/HSPA1B, JUN, KRT7, LAMC2, MMP15, NEDD9, NR1P1, NTSE, PDK4, PMAIP1, PPARG, RGS2, SA              | 568 (19)            |
| IRS1                                          |                | enzyme                            |                            | -0.615             | 0.00023            | ATP2A3, CDKN2B, CEBA, CECPD, CRABP2, EGR1, FBXO32, FOS, HMGCR, ID2, IRS2, KLF4, NRP1, PIK3R1, PLPP3, PPARG, RHOU                                                                 | 476 (21)            |
| WBP2                                          |                | transcription regulator           |                            | -0.621             | 0.0000293          | ADGRF1, AXIN2, BMP4, CASP7, CSPG4, CXCL1, CXCL2, CXCL3, CXCL8, CYP24A1, EGR1, GLCCI1, JDP2, JUN, LIPG, MAPRE3, MBOAT1, PTGS2, SIGMAR1, SLC16A3, SOX4                             | 500 (17)            |
| LRP5                                          |                | transmembrane receptor            |                            | -0.625             | 0.00485            | ALDH1A1, AXIN2, HNF4A, IGFBP2, IRS2, SLC38A5                                                                                                                                     | 433 (15)            |
| KLF6                                          | 0.654          | transcription regulator           |                            | -0.628             | 0.0000139          | ATF3, BCL6, CXCL2, CXCL8, CYP1A1, ENG, GLI1, HNF4A, MCL1, MSLN, NR1D1, PMAIP1, PPARG, PTGS2, RARG, SERPINH1                                                                      | 413 (20)            |
| PPARGC1A                                      |                | transcription regulator           |                            | -0.628             | 0.0000016          | I, EGN1, FBXO32, GDF15, HMGCS2, IGFBP6, IL1R2, IL1RN, INSIG1, IRS2, LDHA, MAOB, ME1, MMP15, MSMO1, NR5A2, PCK2, PCSK5, PDIA5, PDK4, PIK3R1, PMAIP1, PNPLA2, PTGS2, RUNX          | 372 (18)            |
| curcumin                                      |                | chemical drug                     |                            | -0.631             | 0.00000487         | CL1, CXCL3, CXCL8, CXCR4, CYP1A1, DAPK1, DNAJB1, EDN1, EGR1, ENTPD5, ETS1, FAS, FER, FOS, FOSB, FOSL1, FYN, HSPA1A/HSPA1B, JUN, JUND, KLF9, MCL1, NE01, PIM1, PNPLA2, I          | 496 (22)            |
| EFNA5                                         |                | kinase                            |                            | -0.632             | 0.000156           | CRABP2, EREG, FOSL1, IRF1, IRF7, ITGB6, KRT13, KRT7, NTSE, PTGS2                                                                                                                 | 253 (7)             |
| niacinamide                                   |                | chemical - endogenous mammalian   |                            | -0.632             | 0.0117             | CCNG2, CXCL8, IRP1, KLF4, MCL1, NFYA, PDK4, PMAIP1, PTGS2, RUNX2                                                                                                                 |                     |
| TAL1                                          |                | transcription regulator           |                            | -0.636             | 0.000767           | AZGP1, BCL6,                                                                                                                                                                     |                     |

Supplementary Table 4. Upstream regulator analysis based gene set enrichment analysis (GSEA) of differentially expressed genes (DEGs) after ATRA+PDT compared to PDT

| Upstream Regulator                           | Expr Log Ratio | Molecule Type                       | Predicted Activation State | Activation z-score | p-value of overlap | Target Molecules in Dataset                                                                                                                                                       | Mechanistic Network |
|----------------------------------------------|----------------|-------------------------------------|----------------------------|--------------------|--------------------|-----------------------------------------------------------------------------------------------------------------------------------------------------------------------------------|---------------------|
| BTK                                          |                | kinase                              |                            | -0.68              | 0.000412           | BBC3, CDC25A, CDK6, CEBPA, CXCL3, CXCL8, CXCR4, EMP1, ETS1, IFI35, IFIT3, IRF1, JUN, OAS3, PIM1                                                                                   | 424 (19)            |
| glutamine                                    |                | chemical - endogenous mammalian     |                            | -0.682             | 0.0000429          | AKR1C1/AKR1C2, ASS1, CXCL1, CXCL8, DUSP1, FOS, GADD45A, HK1, HSPA1A/HSPA1B, IGF2, IGF2BP2, JUN, KLF4, MCL1, PCK2, PTGS2, SLC16A1, WARS1                                           | 492 (24)            |
| mir-9                                        |                | microRNA                            |                            | -0.689             | 0.0319             | BCL6, CXCR4, ETS1, MEIS2                                                                                                                                                          |                     |
| PNPLA2                                       | 0.343          | enzyme                              |                            | -0.701             | 0.00473            | ACSL1, CD68, CEBPA, CPT1A, DGAT2, PDK4, PNPLA2, PPARG, SLC16A1                                                                                                                    | 393 (21)            |
| KDM3B                                        |                | enzyme                              |                            | -0.707             | 0.00917            | AXIN2, DAPK1, DEGS2, FRMD4B, GATA2, HUIRP, NEDD4L, SORL1, STMN1                                                                                                                   |                     |
| UBE2I                                        |                | enzyme                              |                            | -0.707             | 0.0000566          | CEBPA, CEBPD, CPT1A, IRF1, NR0B2, PDK4, PML, PPARG, SGK1                                                                                                                          | 469 (24)            |
| EFNA2                                        |                | kinase                              |                            | -0.707             | 0.00635            | CRABP2, FOSL1, FOXL1, IRF7, KRT13, KRT7, NEDD4L, NTSE                                                                                                                             |                     |
| selenomethylselenocysteine                   |                | chemical - endogenous mammalian     |                            | -0.707             | 0.0000561          | ABCC1, ATP1B3, CLU, CXCL3, CYP3A5, EGR1, JUN, PSME1                                                                                                                               | 170 (7)             |
| CLOCK                                        |                | transcription regulator             |                            | -0.711             | 0.0000779          | :MIP, DNAJB9, ELOVL6, F2R, GADD45A, GADD45B, HES6, HMGC2, HSPH1, LRATD2, MMP7, MSMO1, NPAS2, NR0B2, NR1D1, NR1D2, OAS3, PPIF, RAP2B, SERINC5, ST6GALNAC4, TMED3                   |                     |
| FOS                                          | 0.547          | transcription regulator             |                            | -0.72              | 4.51E-13           | A-B, HPGD, IGF2BP6, IRS2, JUN, KITLG, KLF6, KRT13, LGALS3, LGALS3BP, LGALS4, LRP8, LTBP3, MALAT1, MADA, MAP4K4, MMP7, MSLN, MT2A, MXD1, NR5A2, NRIP1, PAR6B, PHLDA1, PI           | 477 (20)            |
| CLDN7                                        |                | other                               |                            | -0.72              | 3.87E-11           | DIB, ATP5MC1, CD68, CEACAM5, CEACAM6, CXCL8, DKK1, F5, FOSL1, HLA-B, IFI44, LGALS3, LGR4, LIMA1, MT1X, MT2A, MUC13, NCOA7, PLAAT3, SCEL, SOSTDC1, SYTL2, TEAD2, TINAGL            |                     |
| prednisolone                                 |                | chemical drug                       |                            | -0.724             | 0.0000116          | XC3, BTG1, CEBPD, CTSS, CXCR4, CYP1A1, DAPK1, DUSP1, EDN1, FAS, FBXO32, GAB1, GLI1, IRS2, KLF9, MAP1LC3B, MCL1, NQO2, PLAAT4, PTGS2, SGK1, SPHK2, TGM2, TMEM43, TSC22I            | 442 (19)            |
| T3-TR-RXR                                    |                | complex                             |                            | -0.728             | 0.0142             | AKR1C1/AKR1C2, AKR1C3, KLF9, ME1, SCARB1, SLC16A3                                                                                                                                 |                     |
| 8-bromoguanosine 3',5'-cyclic monophosphate  |                | chemical - kinase inhibitor         |                            | -0.73              | 0.00754            | CAV1, CYP3A5, EDN1, FOS, S100A10, SLC12A4                                                                                                                                         | 457 (23)            |
| salicylic acid                               |                | chemical drug                       |                            | -0.742             | 0.0144             | BGN, CXCL8, GDF15, KITLG, MCL1, PTGS2, SCARB1                                                                                                                                     |                     |
| testosterone                                 |                | chemical - endogenous mammalian     |                            | -0.744             | 7.14E-09           | :DDIT4, DNMT3A, EGR1, FAS, FBXO32, FGFR2, FOS, FOSB, FOSL1, GADD45A, HMGC2, HSPA1A/HSPA1B, IRS2, JUN, JUND, MAOA, MMP7, NR5A2, PIK3R1, PKIB, PPARG, PTGS2                         | 615 (22)            |
| propranolol                                  |                | chemical drug                       |                            | -0.749             | 0.0488             | CYP1A1, DUSP1, FOS, MAOA, PTGS2                                                                                                                                                   |                     |
| ESR1                                         |                | ligand-dependent nuclear receptor   |                            | -0.751             | 1.16E-21           | C2, HLA-B, HLA-C, HLA-E, HLA-J, HMG2A, HMGC2, HSPH1, IFI44, IFITM2, IFITM3, IGF2, IGF2BP2, INCENP, IRF1, IRS2, JUN, JUND, KLHL24, KRT13, KRT7, LATS2, LCN2, LGALS3BP, LI          | 567 (21)            |
| PI3K (family)                                |                | group                               |                            | -0.752             | 2.57E-08           | AKR1B10, AKR1C1/AKR1C2, BIRC3, CCNG2, CDKN2B, CLDN2, CXCL1, CXCL8, CXCR4, DDIT4, EGLN1, FBXO32, FOS, GLI1, HK1, MCL1, PTGS2, SCARB1, SOX4, TGM2, TJP1, TXNIP                      | 553 (29)            |
| silibinin                                    |                | chemical drug                       |                            | -0.756             | 0.0243             | BBC3, CD44, CDK6, CXCL8, EGR1, KLF4, MCL1, PTGS2                                                                                                                                  |                     |
| actinomycin D                                |                | biologic drug                       |                            | -0.756             | 2.46E-12           | CAV1, CCN1, CD55, CXCL1, CXCL8, CYP1A1, CYP24A1, DUSP1, ERRF1, ETS1, FAS, FOS, GADD45A, HBEGF, HK1, HMG2A, ID2, IL1R2, IRF1, IRS2, ITPR2, JUN, MAOA, MCL1, MUC2, PMAIP1, I        | 496 (18)            |
| KDM1A                                        |                | enzyme                              |                            | -0.758             | 0.0000571          | I12, CTSS, CXCL16, DAPP1, DKK1, EIF2AK2, FRRS1, ID2, IFI44, IFIT3, IFITM3, IGF2BP2, IL1RN, IQGAP2, IRF7, LATS2, LGALS3BP, MYO1B, ONECUT2, PARP14, PLXNB2, PTPRB, RARG, RHOU       | 268 (7)             |
| desmopressin                                 |                | biologic drug                       |                            | -0.761             | 0.00623            | ESAM, FOS, HSPA1A/HSPA1B, HSPH1, LIMA1, NDRG2, PPP1R1B, RAP1GAP, SEC61B, TJP2, VDCA1                                                                                              |                     |
| bisindolylmaleimide iv                       |                | chemical - kinase inhibitor         |                            | -0.762             | 0.0279             | CXCL8, EGR1, FOS, MUC2                                                                                                                                                            |                     |
| SB-431542                                    |                | chemical reagent                    |                            | -0.767             | 0.000407           | BGN, BMP4, CD44, CYP1A1, FOS, GADD45B, GATA2, GJB2, ID2, IDI1, IL1R2, RUNX2, SQLE, TGF2, TJP1, TNFRSF12A                                                                          | 558 (22)            |
| BRD4                                         |                | kinase                              |                            | -0.768             | 0.0000808          | ABLIM1, ALDH1B1, BCL3, BTN3A2, CCNA2, CDC25A, CDKN2B, CEBPA, CXCL2, CXCR4, ETV6, FOS, ID2, IRF1, MCL1, MYB, PIM1, SLC38A5, SORD                                                   | 486 (19)            |
| TWIST1                                       |                | transcription regulator             |                            | -0.775             | 0.000205           | ALCAM, ALDH1A1, CD44, CELSR1, CLU, CXCL8, ETS1, FAS, FGFR2, FOS, FOSL1, GLI1, GSN, NTSE, RUNX2, S100A4, SLC28A3, TGF2, TGF2R2, ZYX                                                | 469 (23)            |
| RNF31                                        |                | enzyme                              |                            | -0.777             | 0.000238           | AURKA, CXCL1, CXCL16, CXCL2, CXCL3, CXCL8, CXCR4, IL15RA, IL1R2, IL1RN, NR5A2, SCARB1                                                                                             | 437 (13)            |
| MYC                                          |                | transcription regulator             |                            | -0.78              | 9.33E-16           | :HIVEP2, HLA-B, HLA-E, HOXA5, HSPB1, HSPH1, ID2, IFI35, IFI44, IFI11, IFIT3, IQGAP2, IRF7, ITM2B, JAG2, JUN, KDM6B, KLF4, KLF6, KLF6, KRT7, LDHA, LGMN, LIMA1, LOC102724788/PRODH | 570 (19)            |
| FGF7                                         |                | growth factor                       |                            | -0.787             | 0.00143            | APRT, AQP5, CD44, CEBPA, CEBPD, FGFR2, IRF1, LPCAT1, RUNX2, S100A10, SMAD3                                                                                                        | 488 (22)            |
| chromium                                     |                | chemical drug                       |                            | -0.788             | 0.00404            | AJUBA, ALG2, CXCL8, CYP1A1, ELF3, ENTPD5, PPIF, TNFAIP2                                                                                                                           | 194 (7)             |
| NR1H4                                        |                | ligand-dependent nuclear receptor   |                            | -0.789             | 0.000103           | ABCC2, AMBP, CASP9, CCL15, CEBPA, CYP2B6, CYP3A5, EDN1, FAS, FGF19, HNF4A, KLF4, LCN2, LDHA, NDRG2, NR0B2, NR5A2, PGM1, PPARG, PTGS2, SCARB1, TXNIP                               | 525 (23)            |
| SOCS3                                        |                | phosphatase                         |                            | -0.792             | 0.0385             | ATF3, EGR1, FOS, IL1RN, IRF1, IRS2, JUN, MUC2, TFF3                                                                                                                               |                     |
| ESR2                                         |                | ligand-dependent nuclear receptor   |                            | -0.793             | 3.05E-14           | IL1, FGF19, FOS, GADD45B, GYG1, HMG2A, HPGD, IFI35, IFI44, IFI11, IFIT3, IRF7, KLF4, KRT20, LGALS3BP, LOXL4, MAOA, MDK, MSLN, MXD1, NDRG2, NEDD9, NYFA, PARP12, PARP14, PDK       | 618 (21)            |
| S100A8                                       |                | other                               |                            | -0.798             | 0.000591           | AKAP12, ALDH1A1, ATF3, BCL3, CXCL2, CXCL3, CXCL8, DDIT4, EFNA1, FAS, FOSL1, GJB2, GPRC5A, LOC102724788/PRODH, PHLDA1, PLK3, SEMA3B, SGK1, TXNIP                                   | 496 (20)            |
| NR1H2                                        |                | ligand-dependent nuclear receptor   |                            | -0.798             | 0.00143            | ABCA2, CXCL16, CXCL2, ELOVL6, GLI1, HK1, HMGC2, IL1RN, IRLP8, PNPLA2, PTGS2, REN, SCARB1                                                                                          | 374 (22)            |
| vitamin D                                    |                | chemical drug                       |                            | -0.811             | 0.0291             | CCN1, CYP1A1, CYP24A1, GPR158, REN, SGK1, VDR                                                                                                                                     |                     |
| 12-(3-adamantan-1-yl-ureido) dodecanoic acid |                | chemical reagent                    |                            | -0.816             | 0.00427            | BIRC3, CARD6, CASP4, CASP7, CASP9, FAS, MCL1, SPHK2, TRAF4                                                                                                                        |                     |
| selumetinib                                  |                | chemical drug                       |                            | -0.816             | 0.00246            | ABCC1, FOS, FOSB, FOSL1, JUN, RUNX2                                                                                                                                               | 489 (24)            |
| ZBTB20                                       |                | transcription regulator             |                            | -0.816             | 0.0409             | ACSS2, CYP2B6, CYP3A5, IGF2BP2, NEDD9, PDK4                                                                                                                                       |                     |
| MEX3A                                        | 0.444          | other                               |                            | -0.816             | 0.00984            | AURKA, CD44, KCNE3, NRP1, PDK4, PPARG                                                                                                                                             |                     |
| NEUROG1                                      |                | transcription regulator             |                            | -0.816             | 0.0393             | ASS1, CEMIP, CXCL1, GASK1B, LRIG1, NEO1, S100A4                                                                                                                                   |                     |
| HBB                                          |                | transporter                         |                            | -0.816             | 0.0218             | CXCL2, CXCL3, CXCL8, GDF15, LIF, SCARB1                                                                                                                                           | 403 (16)            |
| evodiamine                                   |                | chemical - endogenous non-mammalian |                            | -0.816             | 0.000672           | BIRC3, CASP9, CXCL8, CYP1A1, MCL1, PTGS2                                                                                                                                          |                     |
| ZBTB16                                       |                | transcription regulator             |                            | -0.819             | 0.00124            | ACER2, BCL6, CCNA2, CD44, CD55, DDC, DHRS3, EIF2AK2, F2R, F2RL1, GALNT6, HPGD, ID2, ME1, NFKBIZ, PIK3R1, PTGS2, RARG, REL, RUNX2, TSC22D1, TSC22D3                                |                     |
| MDM2                                         |                | transcription regulator             |                            | -0.832             | 0.0248             | ATF3, BBC3, CCNA2, CXCL8, ETS1, HIPK2, IGF2BP6, IL1RN, NR0B2                                                                                                                      |                     |
| ritonavir                                    |                | chemical drug                       |                            | -0.849             | 1.19E-09           | :AM5, CEACAM6, CEP135, CEP70, CXCL8, CYP1A1, CYP2B6, CYP3A5, HMGC2, IDI1, KITLG, MAOB, ME1, MSMD1, MYB, PAD12, PPARG, SC5D, SLC39A10, SQLE, TMPPRSS4, TRIM31, TSC22F              | 474 (16)            |
| TRIB3                                        |                | kinase                              |                            | -0.853             | 0.00000468         | CDC25A, CEBPA, DDIT4, GDF15, PCK2, PMAIP1, PPARG, PSPH, RUNX2                                                                                                                     | 498 (22)            |
| ERBB3                                        |                | kinase                              |                            | -0.863             | 0.0000447          | ADAM9, AMOTL2, BGN, CCN1, CCNG2, CLU, CXCR4, DUSP1, EGR1, HBEGF, HMG2A, IGF2, PTGS2, SERPINA3, SGK1, STMN1, TGM2                                                                  | 443 (19)            |
| CALCA                                        |                | other                               |                            | -0.863             | 0.000212           | CD44, CXCL8, CXCR4, CYP24A1, EDN1, ESAM, FOS, LIMA1, NDRG2, PPP1R1B, RAP1GAP, RUNX2, SEC61B, TJP2                                                                                 | 452 (24)            |
| GLI2                                         | -1.025         | transcription regulator             |                            | -0.871             | 0.0169             | BMP4, CLU, CXCL2, CXCL3, GLI1, GLI2, JAG2, PI3, RUNX2, UGCG, VDR                                                                                                                  |                     |
| HLX                                          |                | transcription regulator             |                            | -0.873             | 0.000928           | CD44, CLDN1, CTSS, CXCL8, EGR1, GDF15, JUN                                                                                                                                        | 314 (7)             |
| mirdametnib                                  |                | chemical drug                       |                            | -0.882             | 0.0239             | CXCL8, DDIT4, ETV1, KLF4, MCL1                                                                                                                                                    |                     |
| Go6983                                       |                | chemical - kinase inhibitor         |                            | -0.883             | 0.0000716          | CLDN1, FOS, PPARG, PRKCA, PTGS2, SCARB1                                                                                                                                           | 449 (21)            |
| fenofibrate                                  |                | chemical drug                       |                            | -0.884             | 0.000787           | :ACSL1, CASP4, CD68, CDC25A, CLU, CPT1A, CXCL8, DGAT2, EDN1, FBXO32, GADD45A, GYG1, ID2, JAG2, JUN, PCK2, PDK4, PNPLA2, PTGS2, PTPN21, SC5D, SCARB1, TXNIP, UGT1A10 (i            | 462 (25)            |
| MYOD1                                        |                | transcription regulator             |                            | -0.892             | 0.0211             | ASS1, BCL6, CYP2S1, DUSP1, EIF2AK2, FOSL1, FYN, GADD45A, HES6, HUIRP, HSPA4L, ID2, IGF2, KLF6, LIF, PFKM, SHCBP1, TEAD2, TJP1, TRIM21                                             |                     |
| ARNTL                                        |                | transcription regulator             |                            | -0.896             | 0.0484             | ANGPT1, CCNG2, CEBPA, ELOVL6, HMGC2, NR1D1, TBC1D4                                                                                                                                |                     |
| SMAD7                                        |                | transcription regulator             |                            | -0.898             | 0.00929            | ACVR1, BGN, CCNA2, CDKN2B, CGREF1, FAS, FSTL3, GADD45A, HBEGF, HDAC9, ID2, LTBP3, SMAD3, TGF2, TGFBR2                                                                             | 433 (21)            |
| lomastat                                     |                | chemical drug                       |                            | -0.9               | 0.0241             | CXCL3, CXCL8, HBEGF, TJP1                                                                                                                                                         |                     |
| EPHB4                                        |                | kinase                              |                            | -0.905             | 0.0000512          | BMP4, CXCR4, FGFR2, GATA2, IGF2, KITLG, PDLIM7, RASA1, TGF2, TGFBR2, WNT11                                                                                                        |                     |
| ciprofloxacin                                |                | chemical drug                       |                            | -0.905             | 0.0203             | ACAA1, ADAM8, ALDH2, BMP4, CD68, DNAJC3, LGMN, MYO6, NRP1, PLXNB2, VDCA1                                                                                                          |                     |
| VIP                                          |                | other                               |                            | -0.91              | 0.0414             | CEBPD, CFTR, CLCF1, CXCL2, CXCL3, CXCL8, FOS, IRF1, PTGS2, TJP1                                                                                                                   |                     |
| mir-135                                      |                | microRNA                            |                            | -0.911             | 0.0188             | EDN1, KLF4, MCL1, MTSS1, RUNX2                                                                                                                                                    |                     |
| Wnt                                          |                | group                               |                            | -0.927             | 0.024              | CD44, CEBPA, GLI1, ID2, PPARG, RUNX2                                                                                                                                              |                     |
| HEXIM1                                       |                | transcription regulator             |                            | -0.927             | 0.0319             | ANGPT1, ANXA1, BBC3, TGF2                                                                                                                                                         |                     |
| ERBB4                                        |                | kinase                              |                            | -0.927             | 0.000345           | ADAM9, CASP4, DUSP1, EGR1, GADD45A, HBEGF, HMG2A, IGF2, JUN, PTGS2, SERPINA3, SERPINE2, TBXAS1                                                                                    | 471 (20)            |
| glucosamine                                  |                | chemical - endogenous mammalian     |                            | -0.928             | 0.00309            | ASS1, CEBPA, CXCL1, CXCL3, CXCL8, GPD1, PTGS2, REN, TXNIP                                                                                                                         | 494 (24)            |
| PRNP                                         |                | other                               |                            | -0.933             | 0.00143            | ADAM8, CASP9, CD44, DKK1, EGR1, FOSL1, HSPA1A/HSPA1B, HSPB1, ID2, IGF2, PLPP3                                                                                                     | 469 (22)            |
| NCOA1                                        |                | transcription regulator             |                            | -0.941             | 0.0141             | CASP7, CEBPA, CYP1A1, CYP2B6, EGR1, FGFR2, FOS, GJB2, GYG1, IL1RN, NFKBIZ, NR0B2, PARD6B, PPARG                                                                                   |                     |
| clofibrate                                   |                | chemical drug                       |                            | -0.942             | 0.0000927          | ACAA1, CEACAM1, CPT1A, CXCL8, CYP1A1, DPP4, FAS, GADD45A, HMGC2, IL1RN, MYB, PEX11A, PTGS2, SULT2B1                                                                               | 340 (21)            |
| Alpha catenin                                |                | group                               |                            | -0.952             | 0.00000002         | ADAM8, AXIN2, BCL3, BGN, BIRC3, CXCL2, DKK1, ENG, EREG, IGF2, IGF2BP2, IGF6, IRF1, NFKBIZ, PTGS2, SGK1, STEAP2, STEAP4, TGM2, TNFAIP2, TNFRSF12A, TSPAN8, ZYX                     | 410 (16)            |
| ERN1                                         | 0.515          | kinase                              |                            | -0.952             | 0.000000137        | :EBPD, CXCL2, DGAT2, DNAJB9, DNAJC3, ETS1, FAS, ITGB6, JUN, MAP1LC3B, MCL1, NCOA3, PDIA5, PPARG, PROS1, SDF2L1, SEC24D, SEC61A1, SLC25A28, TINAGL1, TMED3, TXND5C, V              | 419 (18)            |
| canrenoate potassium                         |                | chemical drug                       |                            | -0.958             | 0.00818            | CD68, EDN1, LGALS3, PTGS2                                                                                                                                                         |                     |
| NS-398                                       |                | chemical reagent                    |                            | -0.96              | 0.0113             | ANGPT1, CXCL8, CXCR4, F2R, GATA6, MCL1, MUC2, PPARG, PSMB8, PTGS2, RUNX2                                                                                                          |                     |
| miR-141-3p (and other miRNAs w/seed AACACUG) |                | mature microRNA                     |                            | -0.963             | 0.0302             | AKR1C1/AKR1C2, CDK6, GADD45A, GRB7, MSLN, PMAIP1, RNF128, TGF2                                                                                                                    |                     |
| MTTP                                         |                | transporter                         |                            | -0.97              | 0.00112            | CPT1A, CXCL3, ERN1, HMGC2, JUN, PPARG, RUNX2                                                                                                                                      | 182 (7)             |
| WWTR1                                        |                | transcription regulator             |                            | -0.971             | 0.00000641         | CCN1, CCNA2, CD44, CXCL1, CXCL2, CXCL3, CXCL8, EMP1, ID2, LAMA5, LATS2, RUNX2, UCA1                                                                                               |                     |
| TG                                           |                | other                               |                            | -0.975             | 0.0165             | ANGPT1, CEBPA, CPT1A, IL1R2, PDK4                                                                                                                                                 |                     |
| CSSL1                                        |                | growth factor                       |                            | -0.976             | 0.0105             | BCL6, CYP2B6, CYP3A5, FOS, HNF4A, IRF1, PIK3R1, SERPINH1                                                                                                                          |                     |
| Sch-23390                                    |                | chemical drug                       |                            | -0.984             | 0.000672           | EGR1, FAS, FOS, FOSB, FOSL1, PLD2                                                                                                                                                 | 419 (23)            |
| HDAC1                                        |                | transcription regulator             |                            | -0.986             | 0.0000314          | :IN2, BBC3, BCL6, CCNA2, CD44, CDC25A, CEACAM1, CEACAM6, CEBPA, CXCL1, CXCL8, DUSP1, EGR1, FAS, FOS, GLI1, LCN2, PMAIP1, PPARG, PTGS2, RHOB, RUNX2, SGK1, STX1A, TGF2             | 473 (20)            |
| pentobarbital                                |                | chemical drug                       |                            | -0.987             | 0.00387            | CYP2B6, FOS, JUN, JUND                                                                                                                                                            | 478 (20)            |
| PI3K (complex)                               |                | complex                             |                            | -0.99              | 5.26E-12           | :DDIT4, DKK1, DUSP1, ETS1, FBXO32, FOS, FOSL1, GATA2, GLI1, GLI2, HBEGF, HK1, HMGC2, IGF2, IGF2BP2, IL1RN, JUN, LCN2, MCAM, MCL1, MT2A, NOX1, PIM1, PPP1R1B, PTGS2, RGS2, R       | 488 (21)            |
| PLAG1                                        |                | transcription regulator             |                            | -0.997             | 0.0051             | BTN3A2, CNKSR1, IGF2, QSOX1, S100A2, STX1A, TGM2, TSPAN4                                                                                                                          |                     |
| pregna-4,17-diene-3,16-dione                 |                | chemical - endogenous non-mammalian |                            | -1                 | 0.0241             | CEBPA, MCL1, PPARG, PTGS2                                                                                                                                                         |                     |
| AH1                                          |                | other                               |                            | -1                 | 0.0363             | CCNG2, CMTM7, IL1RN, REPS2                                                                                                                                                        |                     |
| KDM6A                                        |                | enzyme                              |                            | -1                 | 0.0126             | ANKS4B, CSPG4, DKK1, HNF4A, TM4SF4, UPK3B                                                                                                                                         |                     |
| GAS2L3                                       |                | other                               |                            | -1                 | 0.00651            | F2R, FAS, LIF, SAT1                                                                                                                                                               |                     |
| fontolizumab                                 |                | biologic drug                       |                            | -1                 | 0.00818            | CXCL1, FAS, IFI35, IL15RA                                                                                                                                                         |                     |
| TRG                                          |                | other                               |                            | -1                 | 0.000593           | CAV1, CAV2, CXCL1, NTSE                                                                                                                                                           |                     |
| SEL1L                                        |                | other                               |                            | -1                 | 0.0363             | COL17A1, DNAJC3, DOCK5, KANK1, NTN4, PRKCA, TGFBR2, UQCRF5, ZFH3                                                                                                                  |                     |
| ASXL1                                        |                | transcription regulator             |                            | -1                 | 0.0158             | CLP1, FAM162A, GPCPD1, HOXA5, PELI2, PPARG                                                                                                                                        |                     |
| MYT1                                         |                | transcription regulator             |                            | -1                 | 0.00818            | ARHGDB, DAPP1, PTPRB, STEAP3                                                                                                                                                      |                     |
| NKX2-2-AS1                                   |                | other                               |                            | -1                 | 0.041              | AK4, FAM162A, FAM210A, PDK4                                                                                                                                                       |                     |
| LMNA                                         |                | other                               |                            | -1                 | 0.0005             | :4, CCNG2, CEBPA, EDN1, ERN1, FUT4, GATA6, GLIS3, IFI44, IFI11, IRF1, JUN, JUND, MAFF, MCAM, MMP15, MXD4, NPC1, PLD2, PPARG, RESF1, SEMA7A, SKAP2, SLC22A23, ST6GALNAC4,          | 459 (17)            |
| EFNA1                                        | -0.373         | other                               |                            | -1                 | 0.00012            | CLDN2, CRABP2, EPHA2, FOSL1, GATA6, HERC6, IRF7, ITGB6, KRT13, NEDD4L, NTSE, RASA1                                                                                                | 255 (7)             |
| Gcg                                          |                | other                               |                            | -1                 | 0.00193            | ALDH1B1, ASS1, ATP1B1, FOS, ME1, METTL7B, PEX11A, RARRES1, RNASE4                                                                                                                 |                     |
| EMD                                          |                | other                               |                            | -1                 | 0.0123             | EGR1, HOXA5, IRF1, PPL                                                                                                                                                            |                     |
| FABP1                                        |                | transporter                         |                            | -1                 | 0.0279             | FAAH, FGF19, PNPLA2, PPARG                                                                                                                                                        |                     |
| Z-DEVD-FMK                                   |                | chemical - protease inhibitor       |                            | -1                 | 0.00144            |                                                                                                                                                                                   |                     |

Supplementary Table 4. Upstream regulator analysis based gene set enrichment analysis (GSEA) of differentially expressed genes (DEGs) after ATRA+PDT compared to PDT

| Upstream Regulator                            | Expr Log Ratio | Molecule Type                       | Predicted Activation State | Activation z-score | p-value of overlap | Target Molecules in Dataset                                                                                                                           | Mechanistic Network |
|-----------------------------------------------|----------------|-------------------------------------|----------------------------|--------------------|--------------------|-------------------------------------------------------------------------------------------------------------------------------------------------------|---------------------|
| chelythrine                                   |                | chemical drug                       |                            | -1                 | 0.0279             | CXCL3,MCL1,NOX1,PIM1                                                                                                                                  |                     |
| Immunoglobulin                                |                | complex                             |                            | -1.001             | 2.96E-09           | M210A,FAS,FGFR2,FLNB,FOS,FOSB,GALM,GLI1,HLA-E,HSPA6,IFIT3,IFNGR2,IL1R2,IL1RN,IRF1,IRF7,KLF4,LCN2,LGALS3,LGALS3BP,LOC102724788/PRODH,LTBP3,MAFF,MAP3I  | 477 (19)            |
| metformin                                     |                | chemical drug                       |                            | -1.035             | 0.000977           | ATF3,BCL3,CAV1,CXCL8,CYP2B6,CYP3A5,DDIT4,EGLN1,ERN1,FOS,GADD45B,GPD1,IFI44,IL1RN,INSIG1,NR0B2,PARP14,PFKM,PPP1R3B,PTGS2,RUNX2,SCARB1                  | 411 (22)            |
| PPARA                                         |                | ligand-dependent nuclear receptor   |                            | -1.037             | 0.00000104         | SE,CYP11A1,CYP2B6,EDN1,ELOVL6,FOS,GPD1,HLA-E,HMGC,HMGC52,HNF4A,IDI1,IFITM3,IGFBP2,IGFBP6,IL1RN,INSIG1,LGALS4,LIPG,LSS,MAT2A,MSMO1,NR1D1,PKD4,PEX1     | 433 (21)            |
| apigenin                                      |                | chemical - endogenous non-mammalian |                            | -1.039             | 0.0217             | CDK6,CXCL3,CXCL8,CYP1A1,DGAT2,DPP4,DV1L,FOS,PTGS2                                                                                                     |                     |
| haloperidol                                   |                | chemical drug                       |                            | -1.052             | 0.00377            | EGR1,FOS,FOSB,HMGC,HSPG2,PPP1R1B,PRKAR2A,PRKCA,RASA1,SC5D,SIGMAR1                                                                                     | 394 (23)            |
| HIC1                                          |                | transcription regulator             |                            | -1.055             | 0.0291             | CYP24A1,EPHA2,FHL2,LCN2,LIF,LRP8,MCAM                                                                                                                 |                     |
| IRF4                                          |                | transcription regulator             |                            | -1.061             | 0.00216            | B2M,BCL6,BIRC3,CD68,CDK6,CTSS,CXCL3,CXCR4,IL15RA,IL1RN,IRF1,IRF7,PLSCR1,PRKCA,PROCR,RHOB,RUNX2,TRIM21,ZFP36L1                                         | 467 (17)            |
| UPF2                                          |                | other                               |                            | -1.066             | 0.000012           | CLU,KANK1,NEO1,NRP1,PTGS2,PTPN21,RCAN1,TSPAN13,TSPAN8                                                                                                 |                     |
| FLZ                                           |                | chemical drug                       |                            | -1.067             | 0.00207            | DDIT4,FAS,PMAIP1,PTGS2                                                                                                                                |                     |
| harimine                                      |                | chemical - endogenous non-mammalian |                            | -1.067             | 0.00287            | CYP1A1,FOS,PTGS2,RUNX2                                                                                                                                |                     |
| SLC16A2                                       |                | transporter                         |                            | -1.067             | 0.0368             | CIRBP,KLF9,SEMA7A,SLC16A1,SLC16A3                                                                                                                     |                     |
| Mt1                                           |                | other                               |                            | -1.067             | 0.0241             | ATF3,CEBPA,FOS,JUN                                                                                                                                    |                     |
| Mt2                                           |                | other                               |                            | -1.067             | 0.0148             | ATF3,CEBPA,FOS,JUN                                                                                                                                    |                     |
| farglitazar                                   |                | chemical drug                       |                            | -1.067             | 0.00095            | EDN1,REN,SGK1,SULT2B1                                                                                                                                 |                     |
| calyculin A                                   |                | chemical toxicant                   |                            | -1.067             | 0.0363             | EGR1,MCL1,PRKCA,TGM2                                                                                                                                  | 210 (7)             |
| choline                                       |                | chemical - endogenous mammalian     |                            | -1.067             | 0.0268             | BBC3,DNMT3A,ERRF1,IGF2,PTGS2                                                                                                                          |                     |
| hydroxypropyl-beta-cyclodextrin               |                | chemical drug                       |                            | -1.067             | 0.0461             | CD68,HMGC,NPC1,SCARB1                                                                                                                                 |                     |
| TAF4                                          |                | transcription regulator             |                            | -1.069             | 0.00232            | BCL6,CLDN1,EHF,ETS1,GJB2,HBEFG,IDI,IL1RN,KLF4,MAFF,MAP4K4,MXD1                                                                                        |                     |
| paricalcitol                                  |                | chemical drug                       |                            | -1.072             | 0.0406             | F2RL1,PTGS2,REN,TFPI,VDR                                                                                                                              |                     |
| TFAP2A                                        |                | transcription regulator             |                            | -1.081             | 0.0000401          | ALCAM,ANXA1,BIRC3,CCND1,CEBPA,CXCL1,CXCL2,EREG,F2R,IGF2,KLF4,MT2A,PAG1,PLAAT3,PPARG,RAB27B                                                            | 449 (21)            |
| sulforafan                                    |                | chemical drug                       |                            | -1.089             | 0.00203            | ABCC2,AKR1B10,AKR1C1,AKR1C2,AKR7A3,ALDH1A1,CD44,CXCL8,DDC,ENTPD5,FAS,FOS,GATA6,GSTA4,HIPK2,PML,PTGS2                                                  | 506 (22)            |
| KDM2B                                         | -0.33          | enzyme                              |                            | -1.091             | 0.0368             | CDKN2B,CRAP2,FOS,GATA6,LAMA5                                                                                                                          |                     |
| KMT5B                                         |                | enzyme                              |                            | -1.091             | 0.000178           | DUSP1,MT2A,SGK1,TSC22D3                                                                                                                               |                     |
| FASN                                          |                | enzyme                              |                            | -1.093             | 0.00636            | AJUBA,AMOTL2,CAV1,CXCL8,DDIT4,DGAT2,ELOVL6,PNPLA2,PTGS2                                                                                               | 412 (21)            |
| CDK19                                         |                | kinase                              |                            | -1.095             | 1.29E-15           | L1,CXCL2,CXCL8,DDIT4,EPHA2,FAS,GADD45A,HBEFG,HSPA4L,JAG2,JUN,LIF,LSS,MXD1,MXD4,PLK3,PPP1R15A,PROCR,RAP2B,SAT1,SEC61A1,TCN2,TRAF4,TSC22D1,TXNIP        |                     |
| CYP27A1                                       |                | enzyme                              |                            | -1.103             | 0.0207             | ABCC2,CYP2B6,CYP3A5,HMGC                                                                                                                              |                     |
| SS18-SSX2                                     |                | fusion gene/product                 |                            | -1.103             | 0.00144            | AXIN2,CDC25A,DKK1,MCL1                                                                                                                                |                     |
| parthenolide                                  |                | chemical drug                       |                            | -1.118             | 0.00259            | AXIN2,CXCL2,CXCL3,CXCL8,LIF,PKD4,PTGS2                                                                                                                | 425 (18)            |
| eprenone                                      |                | chemical drug                       |                            | -1.119             | 0.0268             | CD68,EDN1,LGALS3,PPARG,PTGS2                                                                                                                          |                     |
| miR-26a-5p (and other miRNAs w/seed UCAAGUA)  |                | mature microRNA                     |                            | -1.121             | 0.000503           | CDK6,CHORDC1,CXCL3,EPHA2,HSPG2,PTGS2,TGFB2                                                                                                            |                     |
| sorafenib                                     |                | chemical drug                       |                            | -1.123             | 0.0126             | CDK6,CXCL8,ERN1,MCL1,PIM1,PPP1R15A                                                                                                                    |                     |
| CDX2                                          |                | transcription regulator             |                            | -1.127             | 5.77E-08           | AOC1,AXIN2,CAV1,CDHR5,CLDN1,CLDN2,CLU,CTSE,DDC,ETS1,FXYP3,GLI2,HEPH,HNF4A,HOXA3,HOXA5,JUN,KLF4,LAMC2,MTUS1,MUC2,PARD6B,SLC26A6,UGT1A10 (include       | 471 (24)            |
| PP1                                           |                | chemical - kinase inhibitor         |                            | -1.129             | 0.000134           | ANGPT1,CXCL16,CXCL8,CXCR4,FOS,IL1RN,JUN,PTGS2,TJP1                                                                                                    |                     |
| manidipine                                    |                | chemical drug                       |                            | -1.131             | 0.000178           | CXCL8,FOS,HMGC,JUN                                                                                                                                    |                     |
| BDKRB2                                        |                | G-protein coupled receptor          |                            | -1.131             | 0.00507            | CD44,EDN1,PTGS2,REN                                                                                                                                   |                     |
| ZNF106                                        |                | other                               |                            | -1.134             | 0.00521            | HSPB1,IFITM3,LGALS3,NCMAP,SERPINA3,TNFRSF12A,UGT8                                                                                                     | 511 (27)            |
| lysophosphatidylinositol                      |                | chemical - endogenous mammalian     |                            | -1.134             | 0.00846            | CFTR,CPT1A,CXCL3,CXCL8,INSIG1,LDHA,PFKM                                                                                                               |                     |
| trichloroethylene                             |                | chemical toxicant                   |                            | -1.134             | 0.0227             | CDK6,EGR1,IDI2,PLD1,RHOB,SLC16A1,TXNIP                                                                                                                | 163 (7)             |
| GPS2                                          |                | transcription regulator             |                            | -1.134             | 0.0366             | CDK6,CXCL8,DHRS3,HIVEP2,RHOB,SGK1,TBC1D2                                                                                                              |                     |
| benzene                                       |                | chemical toxicant                   |                            | -1.134             | 0.0227             | CDK6,EGR1,IDI2,PLD1,RHOB,SLC16A1,TXNIP                                                                                                                |                     |
| SATB1                                         |                | transcription regulator             |                            | -1.138             | 0.000559           | CEACAM1,DNMT3A,ETS1,F5,FEZ2,FOSB,GADD45B,GDF15,IL1R2,IRF7,KITLG,PTGS2,SGK1,SIPA1L2,SMAD3,TRPS1,TSC22D3,TUBA4A,WARS1                                   |                     |
| HNF1A                                         |                | transcription regulator             |                            | -1.143             | 0.0000212          | DC,DPP4,ELF3,FAM107B,FAS,FUT8,FXYP3,GOLT1A,HGD,HHLA2,HMGC,HNF4A,HNF4G,ITM2B,KDM2B,LINC01559,LRRC31,MT1X,MTMR11,NR0B2,NR1D1,NR5A2,RNASE4,RUNX          | 514 (17)            |
| AGTR1                                         |                | G-protein coupled receptor          |                            | -1.151             | 0.000731           | DUSP1,EDN1,FOS,JUN,PTGS2,REN,SGK1,TXNIP                                                                                                               | 349 (22)            |
| NR2F2                                         |                | ligand-dependent nuclear receptor   |                            | -1.154             | 0.00984            | ALDH2,ANGPT1,GATA6,HNF4A,NR5A2,NRP1                                                                                                                   | 247 (10)            |
| NPC2                                          |                | transporter                         |                            | -1.154             | 0.0125             | AKR1C3,CREB5,MAP1LC3B,PPARG,PTGS2                                                                                                                     |                     |
| honokiol                                      |                | chemical - endogenous non-mammalian |                            | -1.154             | 0.0212             | CDK6,FOS,MCL1,PPARG,PTGS2                                                                                                                             |                     |
| SOCS1                                         |                | other                               |                            | -1.157             | 0.00392            | CD44,CXCL2,CXCL8,DUSP1,FAS,FOS,IFI44,IFIH1,IFIT3,IRF1,IRF7,IRS2,JUN,PTGS2,TGM2                                                                        | 345 (17)            |
| NR4A1                                         |                | ligand-dependent nuclear receptor   |                            | -1.157             | 0.00017            | ATF3,ATP5MC3,AXIN2,CEBPA,CRAP2,DAPK1,EHF,GALM,GPD1,HOCAR1,KITLG,MAT2A,MMP7,NTSE,NUCB2,PCK2,PKD4,PFKM,PGM1,PPARG,SAT1,SMAD3,STARD10,SUCLA2,T           | 425 (22)            |
| LRP6                                          |                | transmembrane receptor              |                            | -1.165             | 0.00754            | ALDH1A1,AXIN2,CAV1,CD68,DKK1,FOS,MMP7                                                                                                                 | 437 (21)            |
| dimethyl itaconate                            |                | chemical reagent                    |                            | -1.172             | 0.000319           | ATF3,ERN1,IFIT3,IFITM3,IRF1,LCN2,NFKBIZ                                                                                                               |                     |
| ESRRA                                         |                | transcription regulator             |                            | -1.172             | 0.000303           | ACSL1,CEBPA,CKB,GRB7,GSDMB,HK1,HMGC,IDI1,KRT13,KRT20,LDHA,MAOB,NR0B2,NR1D1,NR1P1,PCK2,PKD4,PPARG,PPP1R1B,RUNX2,WNT11                                  | 419 (17)            |
| ANXA1                                         | 0.312          | enzyme                              |                            | -1.176             | 0.00592            | ANXA1,COL18A1,CXCL2,CXCL8,CXCR4,PTGS2,TSC22D3                                                                                                         | 369 (20)            |
| KCNK9                                         |                | ion channel                         |                            | -1.195             | 0.00347            | CTSE,GADD45B,LCN2,REN,SLC16A3,SNCG,TM4SF4                                                                                                             |                     |
| FOSL1                                         | 0.522          | transcription regulator             |                            | -1.197             | 0.000071           | CCN1,CD44,CXCL8,EDN1,EGR1,FOS,FOSB,FOSL1,HPGD,JUN,MT2A,NRP1,RUNX2,SERPINE2                                                                            | 467 (20)            |
| 5-N-ethylcarboxamido adenosine                |                | chemical reagent                    |                            | -1.207             | 0.0000501          | BAG3,BCL3,CDKN2B,CEBPD,CXCL8,DUSP16,EGR1,GADD45A,IFIT3,KLF6,NRP1,NT5E,PROCR,RGS2,TXNIP,UBC,VDR                                                        | 465 (20)            |
| DACH1                                         |                | transcription regulator             |                            | -1.213             | 0.000134           | BMP4,CDC25A,CXCL3,CXCL8,EGR1,FOS,JUN,KLF4,PTGS2                                                                                                       | 360 (12)            |
| CDK5                                          |                | kinase                              |                            | -1.214             | 0.0212             | CASP9,CXCL2,JUN,PMAIP1,PPP1R1B                                                                                                                        |                     |
| L-histidine                                   |                | chemical - endogenous mammalian     |                            | -1.219             | 0.00207            | ATF3,DDIT4,EGR1,PPP1R15A                                                                                                                              | 417 (16)            |
| IL13                                          |                | cytokine                            |                            | -1.256             | 3.59E-09           | CXCL3,CXCL8,CXCR4,EGR1,FAM162A,FAS,FLOT1,FXYP3,GSN,HK1,HRH1,IFNGR2,IL1R2,IL1RN,JUN,KITLG,KLF6,KLK6,MAOA,MCL1,MSMO1,MT1X,MTSS1,MUC2,PAPSS1,PHLD        | 457 (19)            |
| Esra                                          |                | transcription regulator             |                            | -1.265             | 0.0115             | ACAT1,ACO1,ATP5MC3,CPT1A,GALM,PCK2,PKD4,PGM1,PPP1R1B,PTGS2,REN                                                                                        |                     |
| FBXW7                                         |                | enzyme                              |                            | -1.267             | 0.0026             | CEBPD,DGAT2,DNAJA1,HMGC,HSPB1,HSPH1,JUN,PPARG,RHOB,SOLE                                                                                               | 434 (18)            |
| miR-125b-5p (and other miRNAs w/seed CCCUGAG) |                | mature microRNA                     |                            | -1.272             | 0.0000824          | AJUBA,CASP7,CBX7,CCNA2,CD44,CDC25A,CDK6,CYP1A1,GPR160,IDI2,IL1RN,JUN,SH2B3,TSPAN8,VSIR                                                                | 363 (13)            |
| STAT6                                         |                | transcription regulator             |                            | -1.274             | 7.37E-13           | ,GBP3,GNA14,HIPK2,HMGC,HMGC52,HRH1,IFI44,IFIH1,IFIT3,IFITM3,IL1RN,IMPDH1,IRF1,IRF7,IRS2,KDM6B,LGALS3BP,LIF,LMO7,MYB,NCOA3,NEDD9,OAS3,PKD4,PKIB,PLD1,F | 525 (19)            |
| mir-155                                       |                | microRNA                            |                            | -1.287             | 0.000894           | BCL6,CD68,CEBPA,CLDN1,CXCL8,DNAJB1,DUSP5,EDN1,IFIT3,IRF7,MYB,PPARG,PTGS2                                                                              | 361 (20)            |
| SPARC                                         |                | other                               |                            | -1.291             | 0.000339           | AKR1C3,CEBPD,CLDN1,CYP1A1,DV1L,GPD1,LGX4,LRP8,NIPAL1,PAG1,SLC22A5,TMCS,TRIM25,WNK4,ZHX2                                                               |                     |
| L-triiodothyronine                            |                | chemical - endogenous mammalian     |                            | -1.299             | 6.07E-09           | A,DNMT3A,DUSP1,DUSP5,DV1L,EDN1,EFNA1,EGR1,ENG,FAS,FOS,FUOM,GDF15,GLI2,GNA14,GPCPD1,IDI2,IGFBP6,KLF9,LCN2,LGALS3,LGALS4,ME1,MSMO1,MYOM3,NR1D1,N        | 445 (23)            |
| oleic acid                                    |                | chemical - endogenous mammalian     |                            | -1.302             | 0.0000368          | ACSL1,ATF3,BBC3,CD68,CLU,CXCL8,DGAT2,DUSP1,EDN1,EGR1,FOS,GADD45A,GADD45B,GDF15,HMGC,LCN2,PKD4,PNPLA2,PTGS2,REN                                        | 446 (20)            |
| SYK                                           |                | kinase                              |                            | -1.304             | 0.000125           | AKAP12,BIRC3,CD44,CFTR,CXCL8,CXCR4,EDN1,FOSL1,GADD45A,GLI1,IRF1,PIM1,RASSF6,TSC22D1,TSC22D3,USP53                                                     | 503 (21)            |
| calphostin C                                  |                | chemical - kinase inhibitor         |                            | -1.318             | 0.0000223          | AXIN2,CDC25A,CLU,CXCL8,DKK1,DUSP1,ETS1,FOS,MAOB,MUC2,PPARG,PTGS2,SCARB1                                                                               | 457 (24)            |
| PTGER4                                        |                | G-protein coupled receptor          |                            | -1.32              | 3.65E-08           | DC3,CCNG2,CD44,CDK6,CXCL8,CXCR4,EDN1,EGR1,GAB1,GLI3,HERC6,IFI35,IFIH1,IRF1,IRF7,MAFF,NOX1,PARP14,PTGS2,RNF213,RNF24,RUNX2,SLFN5,TBC1D4,TRIM21,ZFP     | 428 (21)            |
| APOE                                          |                | transporter                         |                            | -1.321             | 3.43E-13           | A1,CPT1A,CTSS,CXCL3,CYP3A5,ECM1,EDN1,EGR1,F2R,F2RL1,FOS,HMGC,HSPA1A,HSPA1B,HSPG2,IGFBP6,IRF1,JUN,KLF4,LCN2,LIMS2,LIPG,LRP8,MYO1B,NPNT,NQO2,PI         | 511 (22)            |
| PPARGC1B                                      |                | transcription regulator             |                            | -1.331             | 0.0243             | CKB,FBXO32,GRB7,HMGC,LSS,PKD4,RUNX2,SOLE                                                                                                              |                     |
| LDLR                                          |                | transporter                         |                            | -1.331             | 0.0000337          | AURKA,AXIN2,BGN,CCNA2,CD55,CD68,CEBPA,DUSP1,E2F7,EGR1,ELOVL6,GALM,HMGC,HSPG2,IL1RN,IRF7,LCN2,PCK2,PKIB,PPARG,PPP1R15A,PSME2,RUNX2,SC5D,SCAR           | 475 (18)            |
| pyrrolidine dithiocarbamate                   |                | chemical reagent                    |                            | -1.333             | 0.0000281          | ANXA1,ASS1,BIRC3,CFTR,CXCL1,CXCL2,CXCL3,CXCL8,CXCR4,IRF1,IRF7,MMP7,NOX1,PLD1,PPARG,PSMB8,PTGS2                                                        | 411 (17)            |
| 4-phenylbutyric acid                          |                | chemical - endogenous mammalian     |                            | -1.335             | 0.0053             | ATP2A3,CASP9,CXCL8,DNAJB9,ERN1,GSN,MXD1,PADI2,PEX11A,PTGS2,SERPINA1                                                                                   | 497 (21)            |
| valproic acid                                 |                | chemical drug                       |                            | -1.336             | 1.85E-09           | ,EDN1,ELOVL6,ERN1,ETV6,FAS,GADD45B,HMGC52,IDI2,IDI1,IGSF1,JUN,JUND,LIMA1,LRP8,MCL1,MRPS2,MSMO1,MYOF,NFYA,NR0B2,OSBPL5,P3H2,PKIB,PNPLA2,PPARG,PSM      | 593 (23)            |
| EP400                                         |                | other                               |                            | -1.342             | 0.0158             | CCNA2,CCNF,CDC25A,E2F7,INCEP,PPARG                                                                                                                    |                     |
| NFIL3                                         |                | transcription regulator             |                            | -1.342             | 0.0125             | FAS,GADD45A,GADD45B,IDI2,PTGS2                                                                                                                        |                     |
| STS                                           |                | enzyme                              |                            | -1.342             | 0.000622           | CD68,CEBPD,EEF1A2,HSPA1A,HSPA1B,IGFBP2,PNPLA2,PPARG                                                                                                   |                     |
| DUSP5                                         | 0.488          | phosphatase                         |                            | -1.342             | 0.00234            | ALDH1A3,DUSP2,EGR1,IDI2,ZFP36                                                                                                                         |                     |
| JAK inhibitor 1                               |                | chemical - kinase inhibitor         |                            | -1.342             | 0.0107             | CXCL1,CXCL2,CXCL3,PTGS2,SGK1                                                                                                                          |                     |
| FUS-DDIT3                                     |                | fusion gene/product                 |                            | -1.342             | 0.00655            | CXCL8,IGFBP6,LCN2,NPAS2,STX1A,TSC22D3                                                                                                                 |                     |
| immethridine                                  |                | chemical reagent                    |                            | -1.342             | 0.0078             | CD44,CTSS,CXCL3,LCN2,SERPINA3                                                                                                                         |                     |
| SP2509                                        |                | chemical reagent                    |                            | -1.344             | 0.000723           | ,CDK6,CRAP2,DHRS3,DNMT3A,EIF2AK2,ELOVL6,FLRT3,FRY1,GATA6,GLI2,HMGA2,IGSF9,INPP1,KLF4,MAP4K4,MICALL2,MYO1B,NPNT,PPP2R5B,SGK1,SMAD3,SOX12,SRI,S         | 517 (22)            |
| HNF4A                                         | -0.821         | transcription regulator             |                            | -1.346             | 1.32E-11           | 5,GJB2,GPR160,GRHL3,GRIN2D,GSN,GSTA4,GYG1,HBEFG,HGD,HHLA2,HLA-B,HLA-C,HNF4A,HNF4G,HSPA4L,HSPH1,IFITM2,INCEP,IPPRID2,JUN,KDM8,KRT7,LCN2,LDHA,LG        | 489 (23)            |
| triptolide                                    |                | chemical drug                       |                            | -1.355             | 3.29E-08           | AKAP12,BBC3,CAV1,CDKN2B,CXCL1,CXCL8,DPP4,DUSP1,EFNA1,EMP1,ENG,F2RL1,FAS,HBEFG,HPGD,IGFBP2,JUN,KITLG,MCAM,MCL1,MMP7,PMAIP1,PTGS2,SOX4,TJP1             | 489 (23)            |
| PTGER2                                        |                | G-protein coupled receptor          |                            | -1.373             | 0.013              | AURKA,CCNA2,CKAP2L,CXCL8,CXCR4,ECM1,EGR1,IL1R2,PIM1,PTGS2,TBL3                                                                                        |                     |
| TAB1                                          |                | enzyme                              |                            | -1.385             | 0.00015            | BIRC3,CXCL8,IFIH1,IRF7,JUN,MCL1,PTGS2,RGS2                                                                                                            | 448 (23)            |
| CBL                                           |                | transcription regulator             |                            | -1.387             | 0.019              | CDKN2B,CFTR,CXCL2,CXCL3,FGFR2,FOS,RUNX2                                                                                                               |                     |
| PD 153035                                     |                | chemical drug                       |                            | -1.399             | 0.000393           | CXCL8,FOS,KRT13,KRT20,MCL1,PTGS2                                                                                                                      | 433 (20)            |
| TMBIM6                                        |                | other                               |                            | -1.412             | 0.0123             | DNAJB9,ERN1,MAP1LC3B,SEC61A1                                                                                                                          |                     |
| EFNA4                                         |                | kinase                              |                            | -1.414             | 0.000865           | CRABP2,FOSL1,IRF1,IRF7,ITGB6,KRT13,KRT7,NT5E                                                                                                          |                     |
| RHO                                           |                | G-protein coupled receptor          |                            | -1.414             | 0.00309            | B2M,CASP7,CD44,CEBPD,CTSS,FOS,IMPDH1,NT5E,SGK1                                                                                                        | 319 (7)             |
| EFNA3                                         |                | kinase                              |                            | -1.414             | 0.00102            | CRABP2,FOSL1,IRF1,IRF7,ITGB6,KRT13,KRT7,NT5E                                                                                                          |                     |
| methylmercury                                 |                | chemical toxicant                   |                            | -1.414             | 0.015              | CDK6,CYP1A1,EGR1,IDI2,PLD1,RHOB,SLC16A1,TXNIP                                                                                                         |                     |
| epigallocatechin-gallate                      |                | chemical drug                       |                            | -1.417             | 0.0000268          | 1,CASP9,CCN1,CEBPA,COL18A1,CXCL1,CXCL3,CXCL8,EDN1,EGR1,FAS,FGF19,FOS,FOSB,FOSL1,GADD45A,GADD45B,GBP3,GJB2,GLI1,IRF1,JUN,JUND,PRKCA,PTGS2,REL,SI       | 453 (22)            |
| rosiglitazone                                 |                | chemical drug                       |                            | -1.429             | 2.99E-11           | 3,EDN1,EGLN1,ELOVL6,ETS1,FOS,FOSL1,GPD1,GYG1,HOCAR1,HMGC52,HPGD,IFIT3,IGF2,IGFBP2,IGFBP6,IL1RN,INSIG1,IRF1,IRF7,IRS2,KLF4,KRT20,LCN2,LDHA,MAT2A,NOX1, | 378 (20)            |
| HDAC4                                         |                | transcription regulator             |                            | -1.45              | 0.00342            | ATF3,FOS,FOSL1,GADD45A,HDAC9,HMGC,IFITM3,JUN,LDHA,PRKCA,PTGS2,RGS2,RUNX2,TNFRSF12A,TSPAN13                                                            | 433 (19)            |
| baicalein                                     |                | chemical drug                       |                            | -1.455             | 0.0196             | CXCL8,CYP1A1,FOS,JUN,MCL1,PTGS2                                                                                                                       |                     |
| miR-24-3p (and other miRNAs w/seed GGCUCAG)   |                | mature microRNA                     |                            | -1.461             | 0.0212             | BBC3,CCNA2,DUSP1,PMAIP1,SMAD3                                                                                                                         |                     |
| heme                                          |                | chemical - endogenous mammalian     |                            | -1.463             | 0.00782            | CD55,CLDN1,CXCL2,CXCL3,LCN2,LIF,SCARB1,TJP1                                                                                                           | 463 (18)            |

Supplementary Table 4. Upstream regulator analysis based gene set enrichment analysis (GSEA) of differentially expressed genes (DEGs) after ATRA+PDT compared to PDT

| Upstream Regulator                                                 | Expr Log Ratio | Molecule Type                       | Predicted Activation State | Activation z-score | p-value of overlap | Target Molecules in Dataset                                                                                                                                        | Mechanistic Network |
|--------------------------------------------------------------------|----------------|-------------------------------------|----------------------------|--------------------|--------------------|--------------------------------------------------------------------------------------------------------------------------------------------------------------------|---------------------|
| miR-203a-3p (and other miRNAs w/seed UGAAAU)                       |                | mature microRNA                     |                            | -1.471             | 0.0107             | CDK6,F2RL1,KLF4,PRKCA,RUNX2                                                                                                                                        |                     |
| tyrphostin AG 1478                                                 |                | chemical - kinase inhibitor         |                            | -1.493             | 0.00288            | CAV1,CXCL8,CXCR4,EDN1,FOS,HBEGF,MCL1,PTGS2,RUNX2,S100A10                                                                                                           | 417 (19)            |
| pitavastatin                                                       |                | chemical drug                       |                            | -1.495             | 0.000672           | HMGCR,IDI1,LSS,PTGS2,SCARB1,SQLE                                                                                                                                   | 248 (10)            |
| STEAP3                                                             | -0.4           | transporter                         |                            | -1.508             | 0.0000728          | ACER2,CD44,ERRFI1,GCNT2,NEDD9,PIK3R1,S100A10,TGF2,TGM2,TNFRSF12A,ZYX                                                                                               |                     |
| GLI1                                                               | -0.756         | transcription regulator             |                            | -1.518             | 5.11E-08           | 4,CEP70,CLU,DKK1,FAS,FOXO1,GATA6,GLI1,GLI2,HXA5,IGF2,IGFBP6,IL1R2,INSIG1,JA2,ILK4,NDRG2,NPDC1,NOQ2,PGM2L1,PIM1,REG4,RHOB,RUNX2,SH2B3,TSC22D1                       | 489 (19)            |
| RPTOR                                                              |                | other                               |                            | -1.521             | 0.00437            | BCL3,CDK6,EGLN1,HMGCR,IDI1,IF144,JUN,LHA,LSS,MSMO1,PPP1R3B,RUNX2,SC5D,SQLE                                                                                         | 485 (18)            |
| Ro41-5253                                                          |                | chemical reagent                    |                            | -1.528             | 0.000672           | CRABP2,IRF1,PPARG,RARG,SMPD3,TGFB2                                                                                                                                 | 305 (11)            |
| PLA2G10                                                            |                | enzyme                              |                            | -1.536             | 0.0232             | BMP4,DHRS3,FAS,KDM6B,KRT13,NABP1,PHLDA1,PPP1R10,PTGS2,TRAF4                                                                                                        |                     |
| luteolin                                                           |                | chemical drug                       |                            | -1.546             | 0.0208             | CDK6,CYP11A1,FAS,FOS,HNF4A,JUN,PTGS2                                                                                                                               |                     |
| diphenyleneiodonium                                                |                | chemical reagent                    |                            | -1.55              | 0.00473            | ATF3,CXCL2,CXCL3,CXCL8,DUSP2,EGR1,FOS,NOX1,PTGS2                                                                                                                   | 433 (19)            |
| tazemetostat                                                       |                | chemical drug                       |                            | -1.553             | 0.000872           | K6,CRABP2,DHRS3,DNMT3A,EIF2AK2,ELOVL6,FLRT3,FRYL,GATA6,GLI2,HMG2,IGSF9,INPPL1,KLF4,MAP4K4,MICALL2,MYO1B,NPNT,PPP2R5B,SGK1,SMAD3,SOX12,SRI,STEAP                    |                     |
| mir-30                                                             |                | microRNA                            |                            | -1.566             | 0.00047            | ARID5B,BBC3,GADD45A,KLF9,NEDD4L,RUNX2,PTGS2,STK39,UGT8                                                                                                             |                     |
| 15-deoxy-delta-12,14-PGJ 2                                         |                | chemical - endogenous mammalian     |                            | -1.576             | 3.27E-08           | CAV2,CEBPD,CXCL2,CXCL8,DNAJB1,EGR1,EHF,FOS,GADD45A,GDF15,GSN,HSPB1,IRF1,JUN,KLF4,MAP1LC3B,MCL1,MDX1,MYB,NOX1,PLAAT4,PPARG,PTGS2,REL,RUNX2,SC                       | 427 (17)            |
| miR-133a-3p (and other miRNAs w/seed UUGUCC)                       |                | mature microRNA                     |                            | -1.586             | 0.0125             | CXCL3,KRT7,MALAT1,MCL1,RUNX2                                                                                                                                       |                     |
| SMARCA5                                                            |                | transcription regulator             |                            | -1.604             | 0.00468            | ALDH1B1,ASS1,B2M,BCL6,CD44,CELSR1,EPHA2,FAS,IFITM2,IRF7,PHLDA1,PLAC8,PLXND1,UNC93B1                                                                                | 199 (7)             |
| N-nitro-L-arginine methyl ester                                    |                | chemical drug                       |                            | -1.614             | 0.00143            | ACO1,ATF3,BGN,CD68,CXCL2,CXCL3,CXCL8,FAS,HMGCR,INSIG1,PDK4,PTGS2,REN                                                                                               | 407 (20)            |
| LDB1                                                               |                | transcription regulator             |                            | -1.616             | 0.0000359          | *1,ANXA1,AXIN2,BBC3,CASP4,CGAS,CLDN2,COL18A1,DP4,ENG,F2R,GSN,HXA5,IFIH1,IRS2,MDK,NT5E,PAG1,PATZ1,PLSCR1,SERPINE2,SLC16A1,SMAD3,TGFB2,TRIM25,TXI                    |                     |
| LMO2                                                               |                | transcription regulator             |                            | -1.616             | 0.0000384          | *1,ANXA1,AXIN2,BBC3,CASP4,CGAS,CLDN2,COL18A1,DP4,ENG,F2R,GSN,HXA5,IFIH1,IRS2,MDK,NT5E,PAG1,PATZ1,PLSCR1,SERPINE2,SLC16A1,SMAD3,TGFB2,TRIM25,TXI                    |                     |
| EWSR1-FLI1                                                         |                | fusion gene/product                 |                            | -1.623             | 0.0162             | ARID5B,CAV1,CCN1,EDN1,HPGD,NFKBIZ,SRLF5,TGFB2,TRNP1                                                                                                                |                     |
| metribolone                                                        |                | chemical reagent                    |                            | -1.626             | 2.65E-15           | *1,ERRFI1,ETV1,FHL2,FOS,GDF15,GTPBP2,HES6,HK1,HMGCR,HMGCS2,HSPH1,IDI1,IFITM2,IRS2,LDHA,LRIG1,MAOA,ME1,MMP7,MRPL34,NEDD4L,NOQ2,PROS1,PYGB,REG4,S                    | 552 (21)            |
| simvastatin                                                        |                | chemical drug                       |                            | -1.626             | 0.0000191          | *1,ANXA1,CCN1,CD55,COTL1,CXCL2,CXCL3,CXCL8,CYP2B6,EDN1,F2R,FOS,HK1,HMGCR,IRF1,KLF4,LCN2,MAP1LC3B,MPP6,NRIP1,PTGS2,RHOB,RHOU,SCARB1,SDC4,ST6GAL                     | 304 (19)            |
| ARHGDI3                                                            |                | other                               |                            | -1.633             | 0.000153           | ALCAM,ANXA1,EDN1,KANK1,PADI1,RGS2                                                                                                                                  |                     |
| ACSS2                                                              |                | enzyme                              |                            | -1.633             | 0.000518           | ACAA1,DGAT2,HMGCR,LSS,PPARG,SCARB1                                                                                                                                 | 338 (13)            |
| (-)-norephedrine                                                   | -0.621         | chemical drug                       |                            | -1.633             | 0.0000467          | HMGCR,IDI1,LSS,MSMO1,NPC1,SQLE                                                                                                                                     | 195 (8)             |
| dihydrotestosterone                                                |                | chemical - endogenous mammalian     |                            | -1.635             | 1.92E-09           | *;GPD1,GSN,HMGCR,HXA5,HPGD,HSPA1A/HSPA1B,HSPB1,IDI1,IGFBP2,IQGAP2,IRS2,JUN,KITLG,LAMA5,LDHA,MAFF,MCAM,ME1,MMP7,NEDD4L,PDE9A,PHF21A,PHLDA1,PM                       | 530 (23)            |
| MYCN                                                               |                | transcription regulator             |                            | -1.646             | 0.00403            | 2,ABCB10,ABCC1,ALDH1A1,AMOTL2,ATXN2,B2M,CAV1,CXNG2,CLU,COL18A1,DNMT3A,DUSP2,FGFR2,GATA6,LD2,LDHA,MAT2A,PMAIP1,POLR2L,S100A10,SLC16A1,SORD,TGM                      | 454 (13)            |
| MAP2K5                                                             |                | kinase                              |                            | -1.646             | 0.00000935         | ACSS2,CXCL8,CYP24A1,ELOVL6,FOS,HMGCR,IDI1,INSIG1,JUN,LSS,MSMO1,PTGS2,SQLE                                                                                          | 379 (21)            |
| BMP10                                                              |                | growth factor                       |                            | -1.648             | 0.00019            | ALDH1A3,ANGPT1,CD55,ECM1,ENG,FGFR2,FOS,GLI1,HPGD,IDI2,LCN2,PHLDA1,SERPINA3,SERPINE2                                                                                | 257 (7)             |
| TSC2                                                               |                | other                               |                            | -1.652             | 1.53E-08           | *1,ANXA1,ATF3,AXIN2,BCL3,CASP9,CD68,EGLN1,EGR1,FOS,GSN,HMGCS2,HSPB1,IF144,IFITM3,IRS2,LGALS3,MAOB,MCL1,MUC2,PDK4,PGM2L1,PHLPP1,PKIB,PPP1R3B,PRKCA,                 | 500 (23)            |
| 26s Proteasome                                                     |                | complex                             |                            | -1.661             | 0.000478           | BAG3,BCL3,BIRC3,CCNA2,CD68,CDC25A,CXCL3,CXCL8,EREG,FOSL1,HBEGF,IFI35,MAP1LC3B,PRKCA,PTGS2,TGM2,TRAF4,TXNIP                                                         | 476 (21)            |
| RPSA                                                               |                | translation regulator               |                            | -1.664             | 0.00295            | CXCL3,DUSP1,DUSP2,GBP3,PTGS2,REL                                                                                                                                   | 505 (20)            |
| N-[N-(3,5-difluorophenacetyl-L-Ala)]-S-phenylglycine t-butyl ester |                | chemical - protease inhibitor       |                            | -1.664             | 0.0443             | CXCL1,CXCL2,CXCR4,REL,RND3,S100A4                                                                                                                                  |                     |
| apicidin                                                           |                | chemical - endogenous non-mammalian |                            | -1.664             | 0.000518           | ATP2A3,CXCL8,FAS,GSN,ROR1,TGM2                                                                                                                                     |                     |
| SIN3A                                                              |                | transcription regulator             |                            | -1.673             | 0.00309            | BCL6,CCNG2,CYP11A1,FBXO3,GADD45B,KLF6,PTGS2,TGFB2,TXNIP                                                                                                            | 412 (14)            |
| GAPDH                                                              |                | enzyme                              |                            | -1.673             | 0.00189            | CXCL1,DUSP1,HLA-C,IFITM2,OAS3,TXNIP,WARS1                                                                                                                          |                     |
| IL10RA                                                             |                | transmembrane receptor              |                            | -1.677             | 9.18E-10           | *;CTSE,CYP2S1,DDIT4,DPEP1,ECM1,EDN1,EHF,ENTPD5,ETV1,FAS,GNE,HPGD,IL15RA,IL1RN,IRF7,IRF7,KCNE3,KITLG,LCN2,MAOB,MYB,NDRG2,NR5A2,P3H2,PLAAT3,PROCR,                   | 273 (12)            |
| docosahexaenoic acid                                               |                | chemical drug                       |                            | -1.681             | 0.000924           | ACSS2,CD44,CPT1A,CXCL8,CXCR4,DNAJB9,ELOVL6,ERN1,FAS,FOS,HPGD,PIK3R1,PNLA2,PTGS2,SERPINH1,SORL1,TGFB2,TGFB2,UGT11A10 (includes others)                              | 485 (22)            |
| H-7                                                                |                | chemical - kinase inhibitor         |                            | -1.683             | 0.000731           | CLCF1,CYP11A1,EGR1,FAS,FOS,PIM1,SMAD3,VDR                                                                                                                          | 482 (20)            |
| NKX2-1                                                             |                | transcription regulator             |                            | -1.698             | 0.00000467         | *R2,AQP5,BMP4,CDKN2B,CBPA,CLU,DP4,ESAM,FAM3D,FXRD3,GLCO1,IGFBP6,KITLG,LCN2,MTUS1,MYB,PARDB6,QSOX1,RNASE4,ROR1,SEC14L2,TFF3,TGFB2,UGT8,WNT                          |                     |
| CD300LF                                                            |                | other                               |                            | -1.709             | 0.000249           | ACSS2,CPT1A,CXCL8,GPD1,HK1,IL1RN,PCK2                                                                                                                              | 257 (7)             |
| miR-34a-5p (and other miRNAs w/seed GGCAGUG)                       |                | mature microRNA                     |                            | -1.727             | 0.000812           | ATF3,AXIN2,CD55,CDC25A,CDK6,FAM221A,GSDMB,HID1,IFITM2,KLF4,LGALS3BP,MYB,PLAAT4,PPARG,TRPS1,TSPAN13                                                                 | 240 (7)             |
| Sb202190                                                           |                | chemical - kinase inhibitor         |                            | -1.73              | 0.0137             | CD55,CFTF,CXCL8,CYP11A1,DKK1,EGR1,FGFR2,FOS,PHLDA1,PTGS2,RHOB,SGK1,VDR                                                                                             |                     |
| rotenone                                                           |                | chemical toxicant                   |                            | -1.746             | 0.0366             | BIRC3,CXCL2,DNAJB9,FOS,PTGS2,SLC16A1,TXNIP                                                                                                                         |                     |
| MYB                                                                | 0.316          | transcription regulator             |                            | -1.749             | 0.0000075          | ATP2B1,AURKA,AXIN2,BIRC3,CDKN2B,CXCL16,CXCL2,CXCR4,ESAM,FUT8,IGF2,JUN,KITLG,KLF4,LCN2,LIF,MAT2A,METTL7B,MTSS1,MYB,NEDD9,PTGS2,SDC4,ZC3H12A                         | 419 (18)            |
| glutathione                                                        |                | chemical - endogenous mammalian     |                            | -1.768             | 0.0484             | ABCC1,ASS1,ATF3,CA9,PTGS2,ZBTB10,ZBTB4                                                                                                                             |                     |
| raloxifene                                                         |                | chemical drug                       |                            | -1.774             | 8.36E-08           | *;BMP4,CLK1,CLU,DDIT4,DUSP1,ENG,F2R,FLNB,GPRC5A,HSPA1A/HSPA1B,JUN,KLF6,KRT7,MDX4,MYO1B,NCOA3,PLK3,PTGS2,RAP1GAP,SLC22A5,SMAD3,SNCG,TGFB2,TGFE                      | 476 (23)            |
| SS18-SSX1                                                          |                | fusion gene/product                 |                            | -1.783             | 0.00000242         | AXIN2,BBC3,CDC25A,DKK1,PMAIP1,SHCBP1                                                                                                                               | 313 (7)             |
| iron                                                               |                | chemical - endogenous mammalian     |                            | -1.801             | 0.0174             | CEBPA,GADD45A,GADD45B,LCN2,NFYA,PPP1R15A,SLC39A8                                                                                                                   |                     |
| trogliatazone                                                      |                | chemical drug                       |                            | -1.802             | 3.85E-13           | P1A1,CYP2B6,CYP3A5,DGAT2,DHRS3,EGR1,ENTPD5,ETS1,FOS,FOSL1,GADD45A,GDF15,GPD1,HIPK2,JUN,KLF4,KRT13,KRT20,LOC102724788/PRODH,MAOB,MCL1,ME1,MYB,I                     | 491 (20)            |
| staurosporine                                                      |                | chemical - kinase inhibitor         |                            | -1.818             | 0.0000954          | BBC3,CFTF,CXCL8,CYP11A1,FAS,FOS,FOSL1,GATA2,IGF2,MCL1,NEDD9,PIM1,PTGS2,RCAN1,SERPINA3,SMAD3,VDR                                                                    | 514 (23)            |
| wortmannin                                                         |                | chemical - kinase inhibitor         |                            | -1.821             | 0.00724            | ATF3,CD44,CDKN2B,CEBPD,CXB,CXCL16,CXCL8,EGR1,F2R,FOS,GPD1,IRF1,IRS2,JUN,MCL1,MT2A,NT5E,PTGS2,SCARB1                                                                | 497 (22)            |
| HMOX1                                                              |                | enzyme                              |                            | -1.824             | 0.00141            | ANGPT1,CDK6,CXCL1,CXCL2,CXCL3,CXCL8,CYP11A1,ENG,FOS,IL1RN,MAP1LC3B,PROCR,PTGS2,TGFB2,ZFP36                                                                         | 454 (20)            |
| BCL3                                                               | 0.773          | transcription regulator             |                            | -1.827             | 0.00092            | CXCL2,CXCL3,CXCL8,DUSP5,EGR1,FOS,IDI2,IRF1,JUN,PDK4                                                                                                                | 431 (18)            |
| FOXA2                                                              |                | transcription regulator             |                            | -1.831             | 0.00864            | AGR2,CD55,CBPA,CPT1A,CXCR4,DDC,DDIT4,HES6,HMGCS2,HNF4A,HPGD,MTUS1,MUC2,NR5A2,PIM1,PPARG,PROS1,RARG,SERPINA1,SPINK1,TBXAS1                                          | 418 (16)            |
| mir-15                                                             |                | microRNA                            |                            | -1.838             | 0.0517             | CDK6,HSPA1A/HSPA1B,LATS2,MCL1,MYB,PIM1,PTGS2                                                                                                                       |                     |
| lithium chloride                                                   |                | chemical drug                       |                            | -1.841             | 0.000143           | ASS1,AXIN2,BCL3,BMP4,CD44,DKK1,FOS,GDF15,HMGCR,IDI1,KRT20,LSS,MT2A,MYB,PLD1,PPARG,PTGS2                                                                            | 436 (22)            |
| Sn50 peptide                                                       |                | chemical toxicant                   |                            | -1.845             | 0.00384            | BIRC3,CXCL2,CXCL8,FAS,IFNGR2,LIPG,MMP7,PPARG,PTGS2                                                                                                                 | 413 (18)            |
| mir-26                                                             |                | microRNA                            |                            | -1.854             | 0.000193           | CDK6,CHORDC1,CXCL3,HPGD,MCL1,PTGS2,STK39                                                                                                                           | 198 (7)             |
| KLF2                                                               |                | transcription regulator             |                            | -1.857             | 1.99E-08           | CL3,BMP4,CAV1,CD44,CD55,CDKN2B,CBPA,CXCL2,CXCL8,CXCR4,ECM1,EDN1,EFNA1,F2RL1,FUT4,GADD45A,IGF2,IL1RN,IRF7,IRF7,KCNE3,KITLG,LGALS9,MT2A,PLPP3,PPARG,PROS1,PTGS2,RUNX | 410 (16)            |
| CST5                                                               |                | other                               |                            | -1.863             | 0.0000168          | *1/AKR1C2,ARHGAP29,CAV1,CD44,CEMIP,CEP170,CHD2,DNAJB4,DOCK5,EPN3,FER,GPRC5A,IGSF9,IQGAP2,ITPRID2,JMJD1C,NPAS2,NRP1,NT5E,PMAIP1,PPL,PYGB,RUNX2,SK                   |                     |
| SREBF1                                                             |                | transcription regulator             |                            | -1.887             | 1.38E-08           | *.LOVL6,FAS,FBXO32,HMGCR,HNF4A,HSPA1A/HSPA1B,IDI1,IL1R2,INSIG1,IRS2,LGALS3,LSS,MDK,MSMO1,NPC1,NR0B2,PCK2,PMPCA,PPARG,PTGS2,SC5D,SCARB1,SERPINA1,;                  | 301 (16)            |
| G protein alpha                                                    |                | group                               |                            | -1.89              | 0.0943             | ANKS4B,CHPF,FOS,GNAZ,LYSMD4,QPCT,SPCS3,TMED3                                                                                                                       |                     |
| NLRX1                                                              |                | other                               |                            | -1.89              | 0.0106             | BCL10,BIRC3,CARD10,IRF1,MAP3K14,PIK3R1,REL                                                                                                                         |                     |
| ATP7B                                                              |                | transporter                         |                            | -1.89              | 0.003              | ELOVL6,HMGCR,IDI1,LSS,MSMO1,SHCBP1,SQLE                                                                                                                            |                     |
| PPP3R1                                                             |                | phosphatase                         |                            | -1.89              | 0.034              | AQP5,BAG3,BCL3,CLIC5,GBP3,H1-0,PDE9A                                                                                                                               |                     |
| TCF4                                                               |                | transcription regulator             |                            | -1.892             | 0.00000175         | *;G,CDKN2B,CSRNP1,CTSE,FAS,GBP3,GNE,GRB7,H1-0,IGF2,MCL1,NEDD9,PARP8,PLAC8,PML,PP1F,PRDX4,RUNX2,SDF2L1,SEC11C,SEC24D,SERINC5,SP140L,TAPBPL,TAI*                     | 273 (7)             |
| SFTPA1                                                             |                | transporter                         |                            | -1.912             | 0.000000216        | AGR3,AKR1C1/AKR1C2,CCN1,CXCL2,CXCL3,ECM1,EGR1,ERN1,FOS,FOSB,GABRP,HBEGF,HSPA6,LRIG1,PDK4,PHLDA1,PLAAT4                                                             | 445 (19)            |
| ZNF217                                                             |                | transcription regulator             |                            | -1.912             | 0.00115            | AGR2,CDKN2B,CREB5,GPRC5A,MYO1B,RCAN1,SEC14L2,SEMA3A,SH3RF2,STRA6,ZHX2                                                                                              |                     |
| THZ2                                                               |                | chemical - kinase inhibitor         |                            | -1.912             | 0.000111           | FHL2,GLI2,HRH1,LIF,MCL1,RUNX2,SMAD3                                                                                                                                |                     |
| mir-29                                                             |                | microRNA                            |                            | -1.93              | 0.00411            | CDK6,CLDN1,DKK1,DNMT3A,KLF4,MCL1,PIK3R1,RUNX2,SCARB1,TRAF4,ZFP36L1                                                                                                 | 371 (11)            |
| Go 6976                                                            |                | chemical - kinase inhibitor         |                            | -1.932             | 0.00427            | CD55,CXCL2,CXCL3,CXCL8,ETS1,FOS,PLD1,PRKCA,PTGS2                                                                                                                   | 452 (23)            |
| resolvin D1                                                        |                | chemical - endogenous mammalian     |                            | -1.933             | 0.00134            | BCL6,CXCL2,CXCL3,CXCL8,CXCR4,JUN,PTGS2                                                                                                                             | 424 (19)            |
| UCN-01                                                             |                | chemical drug                       |                            | -1.934             | 0.00656            | CDC25A,CXCL8,MCL1,RHOB,XPA                                                                                                                                         | 470 (21)            |
| amino acids                                                        |                | chemical - endogenous mammalian     |                            | -1.936             | 0.0363             | FOS,FOSB,IGF2,JUN                                                                                                                                                  |                     |
| SUMO2                                                              |                | enzyme                              |                            | -1.937             | 0.000865           | CAV1,CAV2,CEACAM1,CXCL16,NR0B2,PIK3R1,RNASE4,TSC22D3                                                                                                               |                     |
| PAX7                                                               |                | transcription regulator             |                            | -1.938             | 0.000814           | ASS1,CXCR4,F2RL1,FAM107B,IDI2,MSLN,NPNT,PPARG,RNF128,SEMA3E,TOB1                                                                                                   | 367 (7)             |
| ingolimid                                                          |                | chemical drug                       |                            | -1.941             | 0.566              | CXCL2,FOSB,FOSL1,RUNX2                                                                                                                                             |                     |
| fludarabine                                                        |                | chemical drug                       |                            | -1.949             | 0.0571             | CXCL2,FAS,IRF1,MCL1                                                                                                                                                |                     |
| RBM5                                                               |                | other                               |                            | -1.953             | 0.00000116         | ADAM9,ANXA1,ATP5MC3,BIRC3,IFITM3,INSIG1,MCL1,MYO1B,NCOA3,PIM1,SERPINH1,TSPAN6                                                                                      |                     |
| BDNF                                                               |                | growth factor                       |                            | -1.959             | 0.0000429          | *R4,DUSP1,EGR1,ELOVL6,FLNB,FOS,FOSB,GNAI1,GPC4,HMGCR,HSPA4L,JUN,LCN2,MACROD1,MALAT1,PLTXNB2,PPP1R1B,PTPN9,S100A10,SCARB1,SEMA3E,SERPINH1,SH3I                      | 469 (21)            |
| dichlororibofuranosylbenzimidazole                                 |                | chemical toxicant                   |                            | -1.961             | 0.0123             | CXCL8,CYP11A1,CYP24A1,CYP3A5                                                                                                                                       |                     |
| PRDM16                                                             |                | transcription regulator             |                            | -1.963             | 0.098              | GBP3,IFI44,IRF7,OAS3                                                                                                                                               |                     |
| SERCA                                                              |                | group                               |                            | -1.964             | 0.0000795          | EGR1,FOSL1,JUN,ZFP36                                                                                                                                               |                     |
| fisetin                                                            |                | chemical toxicant                   |                            | -1.964             | 0.149              | BIRC3,FOS,MCL1,PTGS2                                                                                                                                               | 420 (15)            |
| taurine                                                            |                | chemical - endogenous mammalian     |                            | -1.964             | 0.122              | ABCC2,CEBPA,CPT1A,PTGS2                                                                                                                                            |                     |
| SIRT1                                                              |                | transcription regulator             |                            | -1.967             | 0.00000285         | GADD45A,GBP3,GLI1,GLI2,HJURP,HMGCR,HXA5,IFI44,IFIT3,IFITM3,IRF7,KDM2B,KIF13B,LGALS3,LGALS3BP,MAOA,MAT2A,MCL1,MGAT1,NEDD4L,NPNT,NR1D1,PARP12,PARI                   | 428 (21)            |
| MIR101                                                             |                | group                               |                            | -1.969             | 0.00651            | DUSP1,MCL1,PTGS2,STMN1                                                                                                                                             |                     |
| naringenin                                                         |                | chemical - endogenous non-mammalian |                            | -1.969             | 0.0368             | CPT1A,CXCL1,CXCL8,CYP11A1,PTGS2                                                                                                                                    |                     |
| PD184352                                                           |                | chemical drug                       |                            | -1.969             | 0.0241             | CXCL3,EGR1,FOS,MCL1                                                                                                                                                |                     |
| HDAC5                                                              |                | transcription regulator             |                            | -1.97              | 0.0079             | ACSL1,AURKA,CPT1A,DAPK1,HMGCR,HMGCS2,JUN,KLF6,PPARG,RUNX2                                                                                                          | 504 (22)            |
| TNIP1                                                              |                | other                               |                            | -1.972             | 0.14               | CXCL2,CXCL3,HLA-B,LCN2                                                                                                                                             |                     |
| EZR                                                                |                | other                               |                            | -1.973             | 0.0268             | ATF3,DDIT4,FAS,IGFBP2,PTGS2                                                                                                                                        |                     |
| TRAF3                                                              |                | enzyme                              |                            | -1.977             | 0.165              | BIRC3,CXCL2,CXCL3,FAS,MAP3K14,MCL1,PPFBP2                                                                                                                          |                     |
| LY294002                                                           |                | chemical - kinase inhibitor         |                            | -1.979             | 2.63E-15           | *CL3,CXCL8,DUSP1,EGR1,EREG,ETS1,F2R,FAS,FER,FEZ2,FOS,FOSB,FOSL1,GDF15,GPD1,GST4,HBEGF,HMGCR,IDI1,IGF2,IGFBP2,IL1R2,IL1RN,IRF1,IRS2,JUN,LAMC2,LCN2,                 | 510 (20)            |
| ARRB2                                                              |                | other                               |                            | -1.98              | 0.00863            | CXCL2,CXCL3,EGR1,GRK5,NFKBIZ,PTGS2                                                                                                                                 | 399 (17)            |
| tosylphenylalanyl chloromethyl ketone                              |                | chemical - protease inhibitor       |                            | -1.981             | 0.0319             | BIRC3,CXCL2,CXCL8,PTGS2                                                                                                                                            |                     |
| SGPL1                                                              |                | enzyme                              |                            | -1.982             | 0.0363             | ABCC1,PPARG,PTGS2,SEC61A1                                                                                                                                          |                     |
| DNMT1                                                              |                | enzyme                              |                            | -1.982             | 0.472              | CYP24A1,IGF2,LRP8,PPARG,PTGS2                                                                                                                                      |                     |
| IL37                                                               |                | cytokine                            |                            | -1.982             | 0.0279             | CXCL2,CXCL3,CXCL8,IL1RN                                                                                                                                            |                     |
| SL 327                                                             |                | chemical - protease inhibitor       |                            | -1.982             | 0.0461             | BBC3,FOS,FOSB,NEDD4L                                                                                                                                               |                     |
| fucoidin                                                           |                | chemical reagent                    |                            | -1.982             | 0.0571             | CLDN1,CXCL8,IRF7,MCL1                                                                                                                                              |                     |
| mir-34                                                             |                | microRNA                            |                            | -1.984</           |                    |                                                                                                                                                                    |                     |

Supplementary Table 4. Upstream regulator analysis based gene set enrichment analysis (GSEA) of differentially expressed genes (DEGs) after ATRA+PDT compared to PDT

| Upstream Regulator                            | Expr Log Ratio | Molecule Type                     | Predicted Activation State | Activation z-score | p-value of overlap | Target Molecules in Dataset                                                                                                                                | Mechanistic Network |
|-----------------------------------------------|----------------|-----------------------------------|----------------------------|--------------------|--------------------|------------------------------------------------------------------------------------------------------------------------------------------------------------|---------------------|
| N-acetyl-L-cysteine                           |                | chemical drug                     |                            | -1.985             | 0.000163           | 3,BIRC3,CASP4,CASP9,CAV1,CCN1,CFTR,CXCL3,CXCL8,CXCR4,DUSP1,EDN1,EGR1,FAS,FBXO32,FOS,HBEFG,JUN,MAP1LC3B,NFKB1Z,PTGS2,RHOB,RUNX2,SLC16A1,TGFB2               | 468 (20)            |
| R-WIN 55,212                                  |                | chemical reagent                  |                            | -1.986             | 0.0571             | CASP7,CASP9,CDK6,CXCL8                                                                                                                                     |                     |
| levothyroxine                                 |                | chemical - endogenous mammalian   |                            | -1.987             | 0.306              | BBC3,FOS,GDF15,IGFBP6,PCSK6                                                                                                                                |                     |
| NR1D1                                         | 0.662          | ligand-dependent nuclear receptor |                            | -1.987             | 0.122              | EGR1,FOS,ME1,NR1D1                                                                                                                                         |                     |
| STAT5B                                        |                | transcription regulator           |                            | -1.993             | 0.0000474          | RD13B,BCL6,BIRC3,CASP4,CASP9,CDK6,CYP2B6,CYP3A5,DAPK1,DDC,DGAT2,FAS,FOS,GADD45A,GADD45B,GPD1,IRF1,MCL1,ME1,MTMR11,NIPAL1,NT5E,PCSK5,PDK4,PIM1,I            | 484 (20)            |
| anakinra                                      |                | biologic drug                     | Inhibited                  | -2                 | 0.0165             | ABCC2,CXCL1,EDN1,PIM1,PTGS2                                                                                                                                |                     |
| CBX7                                          | 0.635          | other                             | Inhibited                  | -2                 | 0.0123             | CLDN1,CTSS,CXCL8,GDF15                                                                                                                                     |                     |
| ZBED2                                         |                | other                             | Inhibited                  | -2                 | 0.000593           | GATA6,IRF7,OAS3,PIM1                                                                                                                                       | 153 (7)             |
| SPDEF                                         | -1.01          | transcription regulator           | Inhibited                  | -2                 | 0.249              | BIRC3,CXCL8,PRKCA,SMAD3,STMN1                                                                                                                              |                     |
| PPP1R15B                                      |                | phosphatase                       | Inhibited                  | -2                 | 0.00144            | CHAC1,PPARG,PPP1R15A,SES2                                                                                                                                  |                     |
| LRPAP1                                        |                | other                             | Inhibited                  | -2                 | 0.0319             | CXCL8,PTGS2,SERPINA3,SORL1                                                                                                                                 |                     |
| PPP2R5C                                       |                | other                             | Inhibited                  | -2                 | 0.00818            | BCL3,BIRC3,CXCL8,REL                                                                                                                                       | 354 (10)            |
| S100A6                                        |                | transporter                       | Inhibited                  | -2                 | 0.0514             | ATF3,AURKA,CXCL2,CXCL8                                                                                                                                     |                     |
| JAG2                                          | -0.547         | growth factor                     | Inhibited                  | -2                 | 0.122              | BCL6,CXCL1,CXCL3,IL1RN                                                                                                                                     |                     |
| PAEP                                          |                | other                             | Inhibited                  | -2                 | 0.0123             | CXCL1,CXCL16,EDN1,HBEFG                                                                                                                                    |                     |
| NBEAL2                                        |                | other                             | Inhibited                  | -2                 | 0.00818            | CXCL16,CXCL2,CXCL3,GATA2                                                                                                                                   | 396 (7)             |
| ADAMTS12                                      |                | peptidase                         | Inhibited                  | -2                 | 0.0363             | ALDH1A3,LCN2,MID1,TNFAIP2                                                                                                                                  |                     |
| tranilast                                     |                | chemical drug                     | Inhibited                  | -2                 | 0.0176             | CXCL1,CXCL8,NRP1,TXNIP                                                                                                                                     |                     |
| glutamy-L-selenocysteine                      |                | chemical - endogenous mammalian   | Inhibited                  | -2                 | 0.00818            | CLU,EGR1,JUN,PSME1                                                                                                                                         |                     |
| AG490                                         |                | chemical - endogenous mammalian   | Inhibited                  | -2.004             | 0.0000213          | ACAT1,AKR1C3,BIRC3,CD68,CFTR,CXCL2,CXCL8,EDN1,FOS,HPGD,IGF2,IRF1,MCL1,PIM1,PTGS2,S100A10                                                                   | 484 (23)            |
| miR-30c-5p (and other miRNAs w/seed GUAAACA)  |                | mature microRNA                   | Inhibited                  | -2.005             | 0.0000251          | ACVR1,BCL6,IRS2,JUN,KRT7,LOXL4,MAP4K4,MAT2A,NT5E,PGM1,PPARG,RAB27B,RUNX2,SH2B3,SLC12A4,STX1A,TGFB2,TMED3,TNFAIP2,TRPS1                                     |                     |
| INSR                                          |                | kinase                            | Inhibited                  | -2.01              | 4.57E-10           | CXCR4,DGAT2,DUSP1,EDN1,EGR1,EREG,FOS,GADD45A,GATA6,GRB7,HBEFG,HMGR,HPGD,IDI1,IFITM2,IGF2,INSIG1,KLF9,LAT2,LSS,MAOA,MAOB,MSMO1,MUC2,PDK4,PHL                | 489 (26)            |
| miR-199a-5p (and other miRNAs w/seed CCAGUGU) |                | mature microRNA                   | Inhibited                  | -2.032             | 0.0000655          | APOL1,BCAM,BGN,CELSR1,ETS1,GPRC5A,KLF4,LAMC2,LCN2,MMP7,NEDD9,PTGS2,TGFB2                                                                                   |                     |
| Nr1h                                          |                | group                             | Inhibited                  | -2.06              | 0.0000872          | ALDH1A1,ATP1B1,BCL3,CAV1,CXCL1,CXCL8,EDN1,ELOVL6,F2R,GLI1,IFIH1,LAT2,NFKB1Z,NPC1,NR5A2,PML,PTGS2,REN,SBNO2,SCARB1,SP110,SYT7                               | 535 (22)            |
| THRB                                          |                | ligand-dependent nuclear receptor | Inhibited                  | -2.111             | 0.0000856          | 3,CDK6,CEBPA,CFTR,CPT1A,CXCL2,CXCL3,CXCR4,DDC,DKK1,ENG,FOS,FOSL1,GSN,IGFBP2,JUN,KLF9,MACC1,ME1,MMP7,NR5A2,PDK4,PPARG,PTGS2,RUNX2,STRA6,UOCR                | 459 (22)            |
| MEOX2                                         |                | transcription regulator           | Inhibited                  | -2.121             | 0.000514           | ANGPT1,CXCL1,CXCL2,CXCL3,CXCL8,EDN1,EFNA1,HBEFG                                                                                                            | 309 (7)             |
| EPCAM                                         |                | other                             | Inhibited                  | -2.121             | 0.0000313          | ATF3,EGR1,FHL2,FOS,FOSL1,HMG2A,JUN,RUNX2                                                                                                                   | 505 (21)            |
| miR-182-5p (and other miRNAs w/seed UUGGCAA)  |                | mature microRNA                   | Inhibited                  | -2.137             | 0.000254           | CDK6,DDX60L,HERC6,MALAT1,MTSS1,NMI,RARG,SAMD9,SERPINE2,SLFN5,SP110                                                                                         |                     |
| Ro31-8220                                     |                | chemical - kinase inhibitor       | Inhibited                  | -2.174             | 0.00139            | CD55,CLDN1,CXCL8,DUSP1,EGR1,FSTL3,PLD1,PTGS2                                                                                                               |                     |
| miR-27a-3p (and other miRNAs w/seed UCACAGU)  |                | mature microRNA                   | Inhibited                  | -2.183             | 0.0532             | BBC3,PMAIP1,PPARG,SMAD3,ZBTB10                                                                                                                             | 440 (20)            |
| RCAN1                                         | 0.7            | other                             | Inhibited                  | -2.183             | 0.00135            | CCNA2,CCNF,CXCL8,FOS,PTGS2,RCAN1                                                                                                                           |                     |
| STK40                                         |                | kinase                            | Inhibited                  | -2.186             | 0.0323             | CEBPA,CXCL1,CXCL8,FUT4,JUN,PPARG,PTGS2,WNT11                                                                                                               | 469 (22)            |
| ethylene glycol tetraacetic acid              |                | chemical reagent                  | Inhibited                  | -2.194             | 0.0368             | BIRC3,CXCL8,EGR1,FOS,RCAN1                                                                                                                                 |                     |
| NRF1                                          |                | transcription regulator           | Inhibited                  | -2.2               | 0.122              | ATP1B1,CLDN1,CXCL8,IL1RN,TJP1,VDAC1                                                                                                                        |                     |
| FBXO32                                        | 0.306          | enzyme                            | Inhibited                  | -2.2               | 0.0534             | ALDH1A3,AXIN2,CXCL2,CXCL3,DNAJB9,DNAJC3,GADD45A,PTGS2                                                                                                      |                     |
| HSPB1                                         | 0.966          | other                             | Inhibited                  | -2.2               | 0.00919            | BBC3,CCNA2,CXCL2,CXCL3,CXCL8                                                                                                                               | 462 (21)            |
| PS-1145                                       |                | chemical - kinase inhibitor       | Inhibited                  | -2.2               | 0.00183            | CXCL1,CXCL8,IRF1,PTGS2,SERPINA3                                                                                                                            | 405 (16)            |
| Bay 11-7082                                   |                | chemical - kinase inhibitor       | Inhibited                  | -2.201             | 0.00176            | CD44,CXCL1,CXCL2,CXCL3,CXCL8,IL15RA,MCL1,MMP7,PIM1,PTGS2,S100A4                                                                                            | 407 (16)            |
| mifepristone                                  |                | chemical drug                     | Inhibited                  | -2.206             | 0.00000838         | 1,CEBPD,CFTR,CLU,COL18A1,CYP3A5,DDIT4,DUSP1,EGR1,EHF,FAS,FOS,HBEFG,HPGD,IGF2,IRS2,JUN,KLF4,LAMA5,LAMC2,MYB,NCOA3,NQO2,PADI2,PTGS2,RAP1GAP,RGS2             | 545 (21)            |
| MAF                                           |                | transcription regulator           | Inhibited                  | -2.213             | 0.116              | ACSS2,HMGR,IDI1,LSS,NT5E,SQLE                                                                                                                              |                     |
| GADD45A                                       | 0.716          | other                             | Inhibited                  | -2.213             | 0.00367            | CXCL2,CXCL3,FOSB,JUN,MMP7                                                                                                                                  | 488 (18)            |
| USP18                                         |                | peptidase                         | Inhibited                  | -2.219             | 0.0165             | BBC3,IFIH1,IFITM3,IRF1,IRF7                                                                                                                                |                     |
| DLK1                                          |                | other                             | Inhibited                  | -2.232             | 0.00367            | GLI1,IRF1,IRF7,PPARG,REL                                                                                                                                   | 433 (13)            |
| ACKR2                                         |                | G-protein coupled receptor        | Inhibited                  | -2.236             | 0.0579             | EIF2AK2,IFI44,IFIT3,IRF7,OAS3                                                                                                                              |                     |
| SIRT2                                         |                | transcription regulator           | Inhibited                  | -2.236             | 0.0078             | HMGR,IDI1,LSS,SC5D,SQLE                                                                                                                                    |                     |
| DBI                                           |                | other                             | Inhibited                  | -2.236             | 0.0000979          | ACSS2,ELOVL6,HMGR,LSS,PPARG,SQLE                                                                                                                           | 94 (6)              |
| PNPT1                                         |                | enzyme                            | Inhibited                  | -2.236             | 0.000131           | CXCL8,EIF2AK2,IFI44,IFIH1,IFIT3,IRF7,LGALS3BP,PARP12,PARP14,RNF213                                                                                         | 391 (12)            |
| SU6656                                        |                | chemical toxicant                 | Inhibited                  | -2.236             | 0.0268             | ATF3,EGR1,PHLDA1,PTGS2,ZFP36L1                                                                                                                             |                     |
| PRDM1                                         |                | transcription regulator           | Inhibited                  | -2.271             | 5.49E-08           | CDK6,CLDN1,CRISPLD2,CXCL2,CXCL3,CXCR4,DDIT4,DUSP16,ECM1,F5,FOS,FOSL1,IG2,IRF7,MCL1,ME1,MT2A,MTMR11,PCSK6,PLAAT4,PLAC8,PMAIP1,PSMB10,PSMB8,SERP             | 471 (19)            |
| FOXO1                                         |                | transcription regulator           | Inhibited                  | -2.277             | 0.00189            | ANXA1,AURKA,AXIN2,CAV1,CCNA2,CCNF,CD25A,FOS,FUT4,IL1RN,JUN,LDHA,MMP7,STMN1,TGFB2,TJP1                                                                      | 462 (19)            |
| U0126                                         |                | chemical - kinase inhibitor       | Inhibited                  | -2.278             | 4.03E-21           | EIF2AK2,ELOVL6,EMP1,EPHA2,EREG,ERRF1,ETS1,ETV1,FGFR2,FOS,FOSB,FOSL1,GADD45B,GDF15,GLI1,GSN,GSTA4,HBEFG,HMGR,HPGD,IDI1,IL1R2,IRF1,JDP2,JUN,JUND             | 488 (19)            |
| mir-8                                         |                | microRNA                          | Inhibited                  | -2.284             | 6.68E-08           | 3,CCNG2,CDC25A,CDK6,CLDN1,CLDN12,DNAJC3,ERRF1,ETS1,FGFR2,GRB7,GSE1,HOXA5,ITGB6,KITLG,KLF4,LATS2,MSLN,MYO10,PIP5K1A,PMAIP1,RNF128,SERPINE2,TGFB2            | 376 (7)             |
| PSMB11                                        |                | peptidase                         | Inhibited                  | -2.326             | 0.00283            | CAV1,CLDN2,CREB5,CTSS,CXCL3,GADD45A,GADD45B,HSPA1A,HSPA1B,LGALS3,NTN4,PTGS2,RHOB,TGFB2,TNFRSF12A                                                           |                     |
| TFRC                                          |                | transporter                       | Inhibited                  | -2.335             | 0.000026           | ATF3,BBC3,CCNA2,CHAC1,DDIT4,FOS,GADD45A,IG2,JUN,LDHA,ME1,PPARG,PPP1R15A,TGFB2,TNFRSF12A                                                                    | 311 (7)             |
| elaidic acid                                  |                | chemical - endogenous mammalian   | Inhibited                  | -2.35              | 0.0000443          | ACSL1,ALDH1A1,CEBPA,DGAT2,DHRS3,ELOVL6,GNE,HMGR,IDI1,LCN2,LPP,LSS,SC5D,SQLE,TFPI                                                                           |                     |
| miR-155-5p (miRNAs w/seed UAAUGCU)            |                | mature microRNA                   | Inhibited                  | -2.361             | 0.00126            | BRPF3,CCN1,CLDN1,CXCL1,CXCL2,CXCL3,CXCL8,DNAJB1,ETS1,MYB,NT5E,PIK3R1,PLXND1,PMAIP1,PPL,PTGS2,RAB27B,SLC30A1                                                | 383 (18)            |
| DUSP1                                         | 0.918          | phosphatase                       | Inhibited                  | -2.362             | 0.00000306         | APOL6,CXCL1,CXCL2,CXCL3,CXCL8,DKK1,DUSP1,FOSL1,GDF15,GJB2,IFIT3,IL1RN,IRF1,JUN,MXD1,NRP1,PEX11A,PIK3R1,PTGS2,TGFB2,ZFP36                                   | 437 (18)            |
| ETV6-RUNX1                                    |                | fusion gene/product               | Inhibited                  | -2.372             | 0.0000166          | C42EP2,CXCC5,DDIT4,ENG,ID2,IFI35,IFIH1,IFIT3,IL15RA,IRF1,IRF7,JUN,KLF6,LAT2,NEDD4,NM1,PAG1,PIM1,PLXNB2,PMAIP1,PML,PPP1R15A,S100A4,SH2B3,STMN1,SWAP70,      | 155 (5)             |
| BAPTA-AM                                      |                | chemical reagent                  | Inhibited                  | -2.376             | 0.000644           | AQP5,ATF3,CXCL8,CYP1A1,CYP3A5,EGR1,FOS,JUN,PTGS2                                                                                                           | 410 (19)            |
| XBP1                                          |                | transcription regulator           | Inhibited                  | -2.392             | 0.000533           | CL2,CXCL8,DNAJB9,DNAJC3,ETS1,FAS,GOLPH3L,KLF4,MAP1LC3B,NCOA3,NUCB2,PDI45,SDF2L1,SEC11C,SEC24D,SEC61A1,SEC61B,SEC61G,SERPINA1,SPCS3,SRPRB,SSR1              | 390 (16)            |
| ZMPSTE24                                      |                | peptidase                         | Inhibited                  | -2.418             | 0.0218             | ATF3,CXCL2,CXCL3,DDIT4,GADD45A,GADD45B                                                                                                                     |                     |
| SUMO3                                         |                | other                             | Inhibited                  | -2.425             | 0.00984            | CAV1,CAV2,CEACAM1,CXCL16,PML,RNASE4                                                                                                                        |                     |
| lapatinib                                     |                | chemical drug                     | Inhibited                  | -2.425             | 0.000393           | EREG,FOS,FOSB,FOSL1,HBEFG,JUN                                                                                                                              | 516 (23)            |
| isoquercitrin                                 |                | chemical drug                     | Inhibited                  | -2.433             | 0.0000467          | HMGR,HMGC2,INSIG1,MSMO1,SC5D,SQLE                                                                                                                          | 72 (4)              |
| SAFB2                                         |                | other                             | Inhibited                  | -2.449             | 0.000859           | B2M,BBC3,FOS,HLA-C,HLA-E,JUN                                                                                                                               |                     |
| ELL2                                          |                | transcription regulator           | Inhibited                  | -2.449             | 0.0638             | DNAJB9,DNAJC3,FUT8,REXO2,SEC24D,SEC61A1                                                                                                                    |                     |
| MNT                                           |                | transcription regulator           | Inhibited                  | -2.449             | 0.000214           | BCL6,CCNG2,FBXO32,GADD45B,KLF6,TXNIP                                                                                                                       |                     |
| CISH                                          |                | other                             | Inhibited                  | -2.449             | 0.154              | CXCL3,DUSP2,EDN1,PPP1R15A,PTGS2,SORL1                                                                                                                      |                     |
| miR-16-5p (and other miRNAs w/seed AGCAGCA)   |                | mature microRNA                   | Inhibited                  | -2.454             | 0.0000967          | CD25A,CDK6,CHORDC1,CLDN12,DMTF1,DNAJB4,GOLPH3L,HERC6,HSPA1A,HSPA1B,JUN,KITLG,MCL1,MYB,PPIF,PTGS2,RAB30,SERPINE2,SKAP2,SLC16A3,SLC38A5,SRPRB,T              |                     |
| flgrastim                                     |                | biologic drug                     | Inhibited                  | -2.458             | 2.64E-12           | 2,F5,GADD45A,GATA6,GBP3,HIPK2,HPGD,IFI44,IFIT3,IL1R2,JUN,KLF6,KLF9,LDHA,LGALS3,MAFF,MYB,NHS,OAS3,PARP14,PATZ1,PDLIM1,PMAIP1,PRKAR2A,PRRG4,PSMB10,P         |                     |
| PD98059                                       |                | chemical - kinase inhibitor       | Inhibited                  | -2.469             | 3.46E-23           | 1,ENG,EREG,ERRF1,ETS1,F2R,FAM13A,FAS,FOS,FOSB,FOSL1,GADD45A,HBEFG,HMG2A,HPGD,IGF2,IL1RN,INSIG1,JUN,JUND,LAMA5,LDHA,LIPG,MAT2A,MCL1,MMP7,MUC2,I             | 508 (17)            |
| AIRE                                          |                | transcription regulator           | Inhibited                  | -2.53              | 0.000628           | AKR1B10,AMBP,BMP4,EIF2AK2,HERC6,IFI44,IGF2,KLK6,MGAT1,NMI,PARP14,TFP3                                                                                      |                     |
| MACROH2A1                                     |                | other                             | Inhibited                  | -2.53              | 0.00215            | ALDH1A3,CDKN2B,EDN1,EGR1,ETS1,F2R,F2RL1,IGF2,FSTL3,GADD45A,IRF7,PPARG,TJP2                                                                                 | 305 (13)            |
| MAPK1                                         |                | kinase                            | Inhibited                  | -2.563             | 5.07E-19           | iB,GFOD1,GRB7,HLA-B,HLA-C,HLA-E,IFI35,IFI44,IFIH1,IFIT3,IFITM3,IGFBP6,IL1RN,IRF7,IRS2,ITPR2,JUN,JUND,LGALS3,LGALS3BP,LIF,MAOB,MCL1,NMI,NRP1,NT5E,OAS3,PARP | 430 (24)            |
| mir-210                                       |                | microRNA                          | Inhibited                  | -2.566             | 0.184              | EPB41L1,HOXA3,KLF6,SERTAD2,SMCHD1,STMN1,TP53I11                                                                                                            |                     |
| ZFP36                                         | 0.298          | transcription regulator           | Inhibited                  | -2.595             | 0.0000389          | BIRC3,CTSS,CXCL2,CXCL3,FOS,FOSL1,IRF1,JUN,LATS2,LCN2,MXD1,PIM1,PTGS2,UOCRFS1,ZFP36                                                                         | 422 (16)            |
| IKZF1                                         |                | transcription regulator           | Inhibited                  | -2.601             | 0.0000184          | CAV1,CAV2,CD68,CDK6,CXCL2,DEP1,DKK1,DTX3L,DUSP5,EMP1,IFIT3,KITLG,KLF4,LGMN,MYO10,NFKB1Z,PROS1,RNF19A,RNF213,S100A16,SERPINH1,SIPA1L2,SMAD3,TBC1            | 407 (8)             |
| 2-amino-5-phosphonovaleic acid                |                | chemical - other                  | Inhibited                  | -2.607             | 0.00189            | BBC3,CAMKK1,CCDC28A,DUSP1,EGR1,FOS,FOSB,GADD45A,GADD45B,HDAC9,JUN,OTULIN,PHLDA1,PLK3,PTGS2,RGS2                                                            | 438 (20)            |
| infliximab                                    |                | biologic drug                     | Inhibited                  | -2.63              | 0.0422             | CXCL1,CXCL8,DDIT4,EDN1,MT1X,MYO10B,PTGS2                                                                                                                   |                     |
| SH3TC2                                        |                | other                             | Inhibited                  | -2.646             | 0.000402           | ACSL1,EGR1,HMGR,IDI1,LSS,SC5D,SQLE                                                                                                                         |                     |
| SP600125                                      |                | chemical - kinase inhibitor       | Inhibited                  | -2.66              | 3.06E-08           | 3PG4,CXCL1,CXCL16,CXCL2,CXCL3,CXCL8,CYP1A1,DDIT4,DKK1,DUSP1,EGR1,FAS,FLRT3,FOS,FOSB,GADD45A,HNF4A,JUN,LAMA5,MCL1,NEDD9,NOX1,NR0B2,PARP8,PCK2,F             | 453 (19)            |
| PTPRR                                         |                | phosphatase                       | Inhibited                  | -2.668             | 0.0218             | DHRS3,DNMT3A,ETS1,FOS,FOSL1,IFITM2,JUN,PLXNB2,PROCR,ROR1                                                                                                   |                     |
| ARID1A                                        |                | transcription regulator           | Inhibited                  | -2.713             | 0.0000039          | ANXA1,AXIN2,BMP4,CEACAM1,CEACAM6,CXCL1,CXCL2,CXCL8,EREG,F2R,IRS2,UCA1                                                                                      | 484 (20)            |
| PKD1                                          |                | ion channel                       | Inhibited                  | -2.758             | 0.0000237          | ALDH1A1,AMOTL2,ATP1B1,CCN1,CLCF1,CXCL16,CXCL2,DPEP1,FOSB,GLI2,HBEFG,HDAC9,HGD,MID1,NEDD9,NIPAL1,PML,PRAP1,OPCT,RASSF6,RUNX2,SMURF1,TBC1D4,ZI               | 301 (7)             |
| PPARG                                         | 0.347          | ligand-dependent nuclear receptor | Inhibited                  | -2.762             | 1.03E-11           | 1,GATA2,GDF15,GPD1,HCAR1,HIVEP2,HMGR,HMGC2,IGFBP6,INSIG1,IRS2,JUN,KLF4,KLF6,KRT20,LOC102724788/PRODH,ME1,MUC13,NOX1,NR1D1,PCK2,PDK4,PEX                    | 505 (26)            |
| herbimycin                                    |                | chemical - kinase inhibitor       | Inhibited                  | -2.763             | 0.00213            | ATP2A3,CDK6,CXCL8,CXCR4,DUSP1,F2R,FOS,PTGS2                                                                                                                | 475 (22)            |
| SAFB                                          |                | other                             | Inhibited                  | -2.813             | 0.0051             | B2M,BBC3,CXCL8,FOS,HLA-C,HLA-E,JUN,NEDD9                                                                                                                   | 512 (19)            |
| H89                                           |                | chemical - kinase inhibitor       | Inhibited                  | -2.882             | 0.00541            | ANXA1,AQP5,BMP4,CD55,CLCF1,CXCL8,DUSP1,EGR1,EREG,FOS,ITPR2,PLD1,PTGS2,REN,SIGMAR1,SMAD3                                                                    | 466 (22)            |
| COL18A1                                       | -0.478         | other                             | Inhibited                  | -2.882             | 0.000026           | CCNBDP1,DDIT4,EDN1,EFNA1,EGLN1,ETS1,F2R,F2RL1,FOS,JUN,LDHA,MCL1,NRP1,PTGS2,VDAC1                                                                           | 483 (23)            |
| bisindolylmaleimide I                         |                | chemical - kinase inhibitor       | Inhibited                  | -2.919             | 0.0000206          | BIRC3,CD44,CD55,CLCF1,CLDN1,CLU,CXCL8,EGR1,FOS,GDF15,JUND,MAT2A,MMP7,PLD1,PRKCA,PTGS2,RCAN1,TJP1,TJP2                                                      | 461 (20)            |
| mir-181                                       |                | microRNA                          | Inhibited                  | -2.95              | 0.00473            | ATP2B1,CXCL8,GATA6,KLF6,MCL1,PTGS2,RUNX2,SH2B3,TGM2                                                                                                        | 363 (12)            |
| MAX                                           |                | transcription regulator           | Inhibited                  | -2.985             | 0.00132            | BCL6,CCNG2,CD25A,CDKN2B,DUSP2,EDN1,FBXO32,GADD45A,GADD45B,ID2,KLF6,TXNIP                                                                                   | 225 (3)             |
| thalidomide                                   |                | chemical drug                     | Inhibited                  | -2.985             | 0.0000133          | ANGPT1,BIRC3,CAV1,CXCL8,DKK1,FOS,GADD45B,GDF15,NRP1,PIM1                                                                                                   | 483 (21)            |
| SP110                                         |                | transcription regulator           | Inhibited                  | -2.985             | 0.0000144          | ATF3,BCL3,BMP4,CCN1,CDKN2B,CLU,ETS1,F2R,FER,IFIH1,IFIT3,IFITM3,MAOA,MCL1,OAS3,PLSCR1,PPARG,PRKCA,SERPINA1,SOX4,TIA1,TXNIP                                  |                     |
| GMNN                                          | 0.533          | transcription regulator           | Inhibited                  | -3                 | 0.0202             | ACVR1,ANGPT1,DUSP1,DUSP5,EPHA2,GBP3,NRP1,TEAD2,TGFB2                                                                                                       |                     |
| SOX1                                          |                | transcription regulator           | Inhibited                  | -3                 | 0.00917            | ACVR1,ANGPT1,DUSP1,DUSP5,EPHA2,GBP3,NRP1,TEAD2,TGFB2                                                                                                       |                     |
| SOX3                                          |                | transcription regulator           | Inhibited                  | -3                 | 0.0162             | ACVR1,ANGPT1,DUSP1,DUSP5,EPHA2,GBP3,NRP1,TEAD2,TGFB2                                                                                                       |                     |
| SOX2                                          |                | transcription regulator           | Inhibited                  | -3.039             | 8.37E-13           | S,FUT4,FYN,GAB1,GAB2,GADD45B,GATA2,GATA6,GBP3,GLI2,GRHL3,GSN,ID2,IER5L,INPP1,ITPR2,JUN,KANK1,KITLG,KLF4,KLF6,KRT7,LIMA1,LIMS2,NAAA,NR5A2,NRP1,OVOI         | 462 (13)            |
| Irgm1                                         |                | other                             | Inhibited                  | -3.178             | 4.02E-08           | APOBEC3B,B2M,CCNA2,CGAS,CXCL16,FAS,GSDMD,HERC6,ID2,IFI35,IFI44,IFIH1,IFIT3,IFITM3,IRF1,IRF7,OAS3,TRIM21,TRIM25,TRIM56                                      | 293 (14)            |
| SB203580                                      |                | chemical - kinase inhibitor       | Inhibited                  | -3.183             | 3.28E-08           | CXCL3,CXCL8,CYP1A1,DKK1,DNAJC3,DUSP1,EFNA1,EGR1,EHF,EIF2AK2,EREG,FAS,FOS,FOSB,GADD45A,GSTA4,IFI35,IFIT3,IL1RN,IRF1,IRF7,JUN,JUND,MAT2A,MUC2,MXD1,P         | 508 (20)            |
| rotlerin                                      |                |                                   |                            |                    |                    |                                                                                                                                                            |                     |



Supplementary Table 4. Upstream regulator analysis based gene set enrichment analysis (GSEA) of differentially expressed genes (DEGs) after ATRA+PDT compared to PDT

| Upstream Regulator                 | Expr Log Ratio | Molecule Type                       | Predicted Activation State | Activation z-score | p-value of overlap | Target Molecules in Dataset                                                                                                                          | Mechanistic Network |
|------------------------------------|----------------|-------------------------------------|----------------------------|--------------------|--------------------|------------------------------------------------------------------------------------------------------------------------------------------------------|---------------------|
| SREBF2                             |                | transcription regulator             | Inhibited                  | -3.376             | 0.00000216         | ACSL1,ACSS2,BMP4,CXCL1,CXCL8,ELOVL6,HESE6,HMGR,IDI1,INSIG1,IRS2,LSS,MSMO1,PPARG,SC5D,SOLE,TFF3                                                       | 491 (21)            |
| Hdac                               |                | group                               | Inhibited                  | -3.414             | 4.46E-08           | L6,CCNG2,CRABP2,CXCL8,CXCR4,CYP24A1,EDN1,EGR1,FBXO32,FOS,FOSL1,GADD45B,GLI2,HPGD,JUN,KLF6,KLF9,MT1E,MXD1,NPNT,NRP1,ONECUT2,SMPD3,STX1A,TGFBF         | 458 (19)            |
| NKX2-3                             |                | transcription regulator             | Inhibited                  | -3.499             | 6.72E-13           | EDN1,EIF2AK2,F2RL1,GASK1B,GDF15,HLA-B,HLA-C,KLF4,LGMN,MMP7,PARP10,PARP12,PARP14,PLD1,PLSCR1,PMAIP1,PSMB8,PTGS2,RNF213,SAMD9,SEMA3A,SERPINE2,SF       |                     |
| SCAP                               |                | other                               | Inhibited                  | -3.541             | 0.00000653         | ACSL1,ACSS2,ATF3,CYP2B6,ELOVL6,HESE6,HMGR,HMGCS2,IDI1,INSIG1,LGALS3,LSS,MSMO1,PTGS2,SC5D,SOLE,TFF3                                                   | 340 (11)            |
| TRIM24                             |                | transcription regulator             | Inhibited                  | -3.628             | 0.0000946          | CYP24A1,FLRT3,GBP3,HERC6,IFI35,IFI44,IFIH1,IFIT3,IFNGR2,IRF1,IRF7,LGALS3,LGALS3BP,NMI,PARP12,PLAC8,PSMB10,PSMB8                                      | 314 (14)            |
| mibolerone                         |                | chemical drug                       | Inhibited                  | -3.638             | 0.000157           | ACSL1,ALCAM,AMD1,AQP5,CEACAM1,CLU,DHRS3,DNAJA4,HLA-E,INCENP,IRF7,JUN,LSS,MAT2A,SLC22A5,SOLE,STMN1,TMED3                                              |                     |
| RC3H1                              |                | enzyme                              | Inhibited                  | -3.769             | 1.11E-09           | APOBEC3B,CD44,CLDN1,CXCL2,EDN1,FOSL1,HSPB1,IFI44,IFIT3,IFITM3,IRF1,MT2A,NRP1,OAS3,PLSCR1,SHFL,TRIM21,TRIM25,TRIM56                                   | 460 (12)            |
| IL1RN                              | 0.525          | cytokine                            | Inhibited                  | -4.188             | 5.89E-12           | I,CD44,CHAC1,CTSS,CXCL1,CXCL3,CXCL8,CYP3A5,ERAP2,GSDMD,HDAC9,HERC6,IFI44,IFIH1,IFIT3,IRF1,IRF7,KLF6,LGALS9,LIF,NR0B2,OAS3,PMAIP1,PML,PTGS2,RARRES1,S | 471 (17)            |
| phosphatidylinositol               |                | chemical - endogenous mammalian     |                            |                    | 0.0428             | ACAT1,CXCL8                                                                                                                                          |                     |
| sphingosylphosphocholine           |                | chemical - endogenous mammalian     |                            |                    | 0.00789            | FOS,JUN,TGM2                                                                                                                                         | 469 (18)            |
| 1,2-dioctanoyl-sn-glycerol         |                | chemical reagent                    |                            |                    | 0.0217             | JUN,VDR                                                                                                                                              |                     |
| octanoic acid                      |                | chemical - endogenous mammalian     |                            |                    | 0.0285             | CEBPA,DGAT2,PPARG                                                                                                                                    |                     |
| 16,16-dimethylprostaglandin E2     |                | chemical - endogenous mammalian     |                            |                    | 0.00789            | CD44,FOS,NOX1                                                                                                                                        | 300 (12)            |
| (+)-fluprostenol                   |                | chemical drug                       |                            |                    | 0.0217             | NOX1,PPARG                                                                                                                                           |                     |
| epoprostenol                       |                | chemical - endogenous mammalian     |                            |                    | 0.0408             | EGR1,FOS,PTGS2                                                                                                                                       |                     |
| 12(S)-hydroxyeicosatetraenoic acid |                | chemical - endogenous non-mammalian |                            |                    | 0.00546            | PAG1,PPARG,PTGS2                                                                                                                                     | 445 (18)            |
| ATP-gamma-S                        |                | chemical reagent                    |                            |                    | 0.000384           | BTG1,CD55,CXCL2,CXCL8,CXCR4,EREG,IL15RA,IL1R2,NRP1,PTGS2,WARS1                                                                                       | 524 (21)            |
| zidovudine                         |                | chemical drug                       |                            |                    | 0.0241             | BCL10,BCL3,CPT1A,CXCL8                                                                                                                               |                     |
| acyclovir                          |                | chemical drug                       |                            |                    | 0.049              | DUSP2                                                                                                                                                |                     |
| propylthiouracil                   |                | chemical drug                       |                            |                    | 0.0169             | AKR1C3,CXCL2,GSN,IGF2,JUN,LOC102724788/PRODH,NRP1,NSMF,PHLDA1,QPCT,SPINK1                                                                            |                     |
| 3-aminoisobutanoate                |                | chemical - endogenous mammalian     |                            |                    | 0.049              | CPT1A                                                                                                                                                |                     |
| L-cysteine                         |                | chemical - endogenous mammalian     |                            |                    | 0.00789            | CXCL8,FOS,PCK2                                                                                                                                       | 424 (18)            |
| L-methionine                       |                | chemical - endogenous mammalian     |                            |                    | 0.0208             | CLU,CXCL2,GADD45B,MAT2A,PCK2,RHOB,SPHK2                                                                                                              |                     |
| sorbitol                           |                | chemical - endogenous mammalian     |                            |                    | 0.00387            | CCN1,ERRF1,SGK1,SORD                                                                                                                                 | 171 (7)             |
| glycerol                           |                | chemical - endogenous mammalian     |                            |                    | 0.0408             | GLI1,PPARG,SCARB1                                                                                                                                    |                     |
| pelargonidin                       |                | chemical - endogenous non-mammalian |                            |                    | 0.049              | CYP1A1                                                                                                                                               |                     |
| amphotericin B                     |                | chemical drug                       |                            |                    | 0.0343             | CXCL8,IL1RN,LCN2                                                                                                                                     |                     |
| ginsenoside Rb1                    |                | chemical - endogenous non-mammalian |                            |                    | 0.0285             | CXCL8,FOS,HBEGF                                                                                                                                      |                     |
| saikosaponin A                     |                | chemical reagent                    |                            |                    | 0.000343           | BMP4,CDKN2B,FOS,JUN                                                                                                                                  | 422 (13)            |
| epothilone B                       |                | chemical drug                       |                            |                    | 0.0408             | FAS,MCL1,TBC1D1                                                                                                                                      |                     |
| troandomycin                       |                | chemical drug                       |                            |                    | 0.049              | CYP3A5                                                                                                                                               |                     |
| 3,7,12-trihydroxycoprostanol       |                | chemical - endogenous mammalian     |                            |                    | 0.049              | CYP3A5                                                                                                                                               |                     |
| 6beta-hydroxyestradiol-17beta      |                | chemical - endogenous non-mammalian |                            |                    | 0.049              | CYP2B6                                                                                                                                               |                     |
| estrone                            |                | chemical - endogenous mammalian     |                            |                    | 0.0343             | CYP2B6,IRS2,PIK3R1                                                                                                                                   |                     |
| taurothiocholate-3-sulfate         |                | chemical - endogenous mammalian     |                            |                    | 0.049              | ABCC2                                                                                                                                                |                     |
| glycochenodeoxycholate             |                | chemical - endogenous mammalian     |                            |                    | 0.0285             | BIRC3,HPGD,NR0B2                                                                                                                                     |                     |
| Srebp                              |                | group                               |                            |                    | 0.0123             | ACSL1,ACSS2,FOS,NPC1                                                                                                                                 |                     |
| taurochenodeoxycholate             |                | chemical - endogenous mammalian     |                            |                    | 0.00697            | HPGD,NR0B2                                                                                                                                           |                     |
| cholesterol sulfate                |                | chemical - endogenous mammalian     |                            |                    | 0.00789            | FOSL1,JUN,NR1D1                                                                                                                                      | 241 (11)            |
| CP-55940                           |                | chemical reagent                    |                            |                    | 0.0368             | CXCL8,GADD45A,GRK5,JUN,UBC                                                                                                                           |                     |
| fluoride                           |                | chemical - endogenous mammalian     |                            |                    | 0.00651            | FAS,FOS,GADD45A,RUNX2                                                                                                                                | 234 (13)            |
| dopamine D1 receptor               |                | group                               |                            |                    | 0.0428             | FOS,FOSB                                                                                                                                             |                     |
| TEAD                               |                | group                               |                            |                    | 0.0109             | CAV2,CCN1,CD44                                                                                                                                       |                     |
| Histone H2b                        |                | group                               |                            |                    | 0.0428             | IRF1,PPP1R3B                                                                                                                                         |                     |
| asialo GM1 ganglioside             |                | chemical - endogenous mammalian     |                            |                    | 0.0217             | CXCL8,MUC2                                                                                                                                           |                     |
| thromboxane A2                     |                | chemical - endogenous mammalian     |                            |                    | 0.049              | PTGS2                                                                                                                                                |                     |
| 2'-adenylic acid                   |                | chemical - endogenous mammalian     |                            |                    | 0.049              | TXNIP                                                                                                                                                |                     |
| dibutyryl cGMP                     |                | chemical reagent                    |                            |                    | 0.0217             | AQP5,PTGS2                                                                                                                                           |                     |
| Rp-8-CPT-cAMPS                     |                | chemical - kinase inhibitor         |                            |                    | 0.049              | SCARB1                                                                                                                                               |                     |
| ADP                                |                | chemical - endogenous mammalian     |                            |                    | 0.0343             | CXCL8,FOS,REN                                                                                                                                        |                     |
| desoxycorticosterone               |                | chemical - endogenous mammalian     |                            |                    | 0.0478             | CXCL2,FOS,PTGS2                                                                                                                                      |                     |
| monooleylphosphatidic acid         |                | chemical - endogenous mammalian     |                            |                    | 0.00697            | EREG,PLPP3                                                                                                                                           |                     |
| pCPT-cAMP                          |                | chemical - kinase inhibitor         |                            |                    | 0.0478             | EGR1,FOS,JUN                                                                                                                                         |                     |
| clobetasol propionate              |                | chemical drug                       |                            |                    | 0.0185             | ABCC1,CYP3A5,FAS                                                                                                                                     |                     |
| beclomethasone dipropionate        |                | chemical drug                       |                            |                    | 0.049              | CYP3A5                                                                                                                                               |                     |
| bevacizumab                        |                | biologic drug                       |                            |                    | 0.0478             | ANGPT1,CXCR4,NRP1                                                                                                                                    |                     |
| afatinib B1                        |                | chemical - endogenous non-mammalian |                            |                    | 0.0109             | CYP1A1,CYP3A5,IRS2                                                                                                                                   |                     |
| GON4L                              |                | transcription regulator             |                            |                    | 0.0285             | CCNA2,CCNF,MYB                                                                                                                                       |                     |
| ADRA1                              |                | group                               |                            |                    | 0.0217             | EGR1,FOS                                                                                                                                             |                     |
| dienogest                          |                | chemical drug                       |                            |                    | 0.0217             | CXCL8,PTGS2                                                                                                                                          |                     |
| pivaloyloxymethyl butyrate         |                | chemical drug                       |                            |                    | 0.049              | ATP2A3                                                                                                                                               |                     |
| (6)-gingerol                       |                | chemical - endogenous non-mammalian |                            |                    | 0.0428             | CDK6,PTGS2                                                                                                                                           |                     |
| cyanuric acid                      |                | chemical reagent                    |                            |                    | 0.049              | CXCL8                                                                                                                                                |                     |
| eicosa-11Z, 14Z-dienoic acid       |                | chemical - endogenous mammalian     |                            |                    | 0.049              | PNPLA2                                                                                                                                               |                     |
| styrene                            |                | chemical toxicant                   |                            |                    | 0.0217             | EGR1,HSPA1L                                                                                                                                          |                     |
| peptide YY 3-36                    |                | biologic drug                       |                            |                    | 0.049              | FOS                                                                                                                                                  |                     |
| ATXN8OS                            |                | other                               |                            |                    | 0.0217             | ANGPT1,TGFBF2                                                                                                                                        |                     |
| MEG3                               |                | other                               |                            |                    | 0.0285             | GDF15,JUN,PHLPP1                                                                                                                                     |                     |
| decabromobiphenyl ether            |                | chemical toxicant                   |                            |                    | 0.0135             | CYP2B6,CYP3A5                                                                                                                                        |                     |
| trans-cinnamaldehyde               |                | chemical drug                       |                            |                    | 0.0241             | CXCL8,EGR1,FAS,PTGS2                                                                                                                                 |                     |
| pyrvinium                          |                | chemical drug                       |                            |                    | 0.0316             | AXIN2,ID2                                                                                                                                            |                     |
| 2-amino-5-azotoluene               |                | chemical toxicant                   |                            |                    | 0.00546            | ABCC2,CYP2B6,CYP3A5                                                                                                                                  |                     |
| hydroxamic acid                    |                | chemical - other                    |                            |                    | 0.049              | CXCR4                                                                                                                                                |                     |
| JINK1/2                            |                | group                               |                            |                    | 0.041              | AXIN2,FAS,PTGS2,RHOB                                                                                                                                 |                     |
| Sos                                |                | group                               |                            |                    | 1.62E-08           | I,CRABP2,ELOVL6,FOS,IRS2,KLF6,KRT13,LGALS3BP,LGALS4,LRP8,LTBP3,MAOA,MAP4K4,MXD1,NR1P1,PHLDA1,PKN1,PLD1,PTGS2,RAP1GAP,SEMA3B,SEMA3E,SMURF1,STM        | 515 (23)            |
| Pdgfr                              |                | group                               |                            |                    | 0.0232             | EGR1,EREG,HBEGF                                                                                                                                      |                     |
| LTB4R/LTB4R2                       |                | group                               |                            |                    | 0.049              | CXCL8                                                                                                                                                |                     |
| Goq                                |                | group                               |                            |                    | 0.049              | PTGS2                                                                                                                                                |                     |
| NDPK                               |                | group                               |                            |                    | 0.049              | CXCL8                                                                                                                                                |                     |
| Rsk                                |                | group                               |                            |                    | 0.0135             | CXCL2,CXCL8                                                                                                                                          |                     |
| Foxo                               |                | group                               |                            |                    | 0.00106            | ABCC2,CDKN2B,FBXO32,GADD45A,PMAIP1                                                                                                                   | 388 (7)             |
| CaMKII                             |                | complex                             |                            |                    | 0.0207             | BIRC3,CD44,FOS,IRF1                                                                                                                                  |                     |
| Actin                              |                | group                               |                            |                    | 0.0285             | ABCC1,CD44,LPP                                                                                                                                       |                     |
| C4BP                               |                | complex                             |                            |                    | 0.00546            | HMGR,IDI1,MSMO1                                                                                                                                      |                     |
| RNA polymerase II                  |                | complex                             |                            |                    | 0.0000425          | CXCL8,CXCR4,CYP1A1,CYP24A1,DKK1,DUSP1,FOS,FOSL1,GADD45A,GADD45B,GDF15,HNF4A,HSPA1A/HSPA1B,IL1RN,JUN,KITLG,NCOA3,NR5A2,PPARG,PRR15L,PTGS2,RND         | 461 (13)            |
| tyrosine kinase                    |                | group                               |                            |                    | 0.0135             | CD44,CYP1A1                                                                                                                                          |                     |
| beta-glucuronidase                 |                | group                               |                            |                    | 0.049              | PTGS2                                                                                                                                                |                     |
| nicotinic acetylcholine receptor   |                | complex                             |                            |                    | 0.0428             | FOS,JUN                                                                                                                                              |                     |
| 15-LOX                             |                | group                               |                            |                    | 0.00697            | MAOA,PPARG                                                                                                                                           |                     |
| MKK3/6                             |                | group                               |                            |                    | 0.049              | CXCL8                                                                                                                                                |                     |
| Histone h3                         |                | group                               |                            |                    | 0.00000515         | PA,CSPG4,CXCL8,CYP3A5,DKK1,DUSP16,DUSP2,EFNA1,EGR1,FGFR2,FOS,GATA2,GATA6,GLI1,HNF4A,HOXA5,ID2,IFITM3,IGFBP2,IRF7,JUN,MEIS2,MTUS1,PMAIP1,PPARG,PR     | 502 (21)            |
| Fgf                                |                | group                               |                            |                    | 0.0212             | FOS,JUN,LPCAT1,PTGS2,RUNX2                                                                                                                           |                     |
| Gli                                |                | group                               |                            |                    | 0.0123             | GLI1,JAG2,RUNX2,S100A4                                                                                                                               |                     |
| MSK1/2                             |                | group                               |                            |                    | 0.0024             | DUSP1,FOS                                                                                                                                            |                     |
| adenosine deaminase                |                | group                               |                            |                    | 0.049              | CXCL3                                                                                                                                                | 344 (7)             |
| Erm                                |                | group                               |                            |                    | 0.0217             | CAV1,CD44                                                                                                                                            |                     |
| ETS                                |                | group                               |                            |                    | 0.0207             | EGR1,ENG,FOS,HPGD                                                                                                                                    |                     |
| growth factor receptor             |                | group                               |                            |                    | 0.049              | FOS                                                                                                                                                  |                     |
| N-cor                              |                | group                               |                            |                    | 0.00143            | ACSL1,AXIN2,CDK6,CTSS,CXCL2,DHRS3,ELOVL6,HBEGF,HIVEP2,PTGS2,RHOB,SGK1,TBC1D2                                                                         | 451 (13)            |
| Ctnna                              |                | group                               |                            |                    | 0.0217             | AXIN2,CXCR4                                                                                                                                          |                     |
| desmethoxyangonin                  |                | chemical - endogenous non-mammalian |                            |                    | 0.049              | CYP3A5                                                                                                                                               |                     |
| dihydrokawain                      |                | chemical - endogenous non-mammalian |                            |                    | 0.049              | CYP3A5                                                                                                                                               |                     |

Supplementary Table 4. Upstream regulator analysis based gene set enrichment analysis (GSEA) of differentially expressed genes (DEGs) after ATRA+PDT compared to PDT

| Upstream Regulator                     | Expr Log Ratio | Molecule Type                       | Predicted Activation State | Activation z-score | p-value of overlap | Target Molecules in Dataset                                                                                                        | Mechanistic Network |
|----------------------------------------|----------------|-------------------------------------|----------------------------|--------------------|--------------------|------------------------------------------------------------------------------------------------------------------------------------|---------------------|
| Stat1 dimer                            |                | complex                             |                            |                    | 0.00354            | EIF2AK2,IRF1,PIM1                                                                                                                  | 153 (7)             |
| Stat1-Stat2                            |                | complex                             |                            |                    | 0.0109             | EIF2AK2,IRF1,IRF7                                                                                                                  |                     |
| Smad2/3-Smad4                          |                | complex                             |                            |                    | 0.0478             | CDKN2B,HMGA2,IRF7                                                                                                                  |                     |
| Integrin                               |                | complex                             |                            |                    | 0.0478             | FOS,JUN,TGFB2                                                                                                                      |                     |
| Bcl9-Cbp/p300-Cttnb1-Lef/Tcf           |                | complex                             |                            |                    | 0.00789            | AXIN2,CD44,MMP7                                                                                                                    |                     |
| rifamycin SV                           |                | chemical drug                       |                            |                    | 0.049              | BCL6                                                                                                                               |                     |
| 2,2',4,4',5,5'-hexabromodiphenyl ether |                | chemical reagent                    |                            |                    | 0.049              | CYP1A1                                                                                                                             |                     |
| endrin                                 |                | chemical toxicant                   |                            |                    | 0.0024             | CEBPA,PPARG                                                                                                                        | 197 (7)             |
| 5,7-dimethoxyflavone                   |                | chemical - endogenous mammalian     |                            |                    | 0.049              | CYP1A1                                                                                                                             |                     |
| DE 71                                  |                | chemical reagent                    |                            |                    | 0.049              | CYP1A1                                                                                                                             |                     |
| 3',5'-methoxyflavone                   |                | chemical reagent                    |                            |                    | 0.049              | PTGS2                                                                                                                              |                     |
| perfluorooctanoic acid                 |                | chemical reagent                    |                            |                    | 0.0408             | CXCL8,DNMT3A,HMGR                                                                                                                  |                     |
| stevioside                             |                | chemical - endogenous non-mammalian |                            |                    | 0.0135             | PPARG,PTGS2                                                                                                                        |                     |
| miocamycin                             |                | chemical drug                       |                            |                    | 0.049              | MUC2                                                                                                                               |                     |
| aurapten                               |                | chemical - endogenous non-mammalian |                            |                    | 0.00109            | CPT1A,CXCL8,PTGS2                                                                                                                  | 170 (7)             |
| Hottip                                 |                | other                               |                            |                    | 0.0217             | SMAD3,TGFB2                                                                                                                        |                     |
| JUN/JUNB/JUND                          |                | group                               |                            |                    | 0.041              | CCN1,FOS,FOSL1,JUN                                                                                                                 |                     |
| Rxr                                    |                | group                               |                            |                    | 0.000139           | ABC110,ABCC2,CPT1A,CTSS,CYP24A1,CYP2B6,CYP3A5,GADD45A,HBEGF,INSIG1,KDM6B,NR0B2,NR5A2,PKD4,PPARG,PTGS2                              | 456 (23)            |
| RAR-RXR                                |                | complex                             |                            |                    | 0.0217             | IRF1,TGM2                                                                                                                          |                     |
| tylophorine                            |                | chemical drug                       |                            |                    | 0.0135             | JUN,PTGS2                                                                                                                          |                     |
| MLN8054                                |                | chemical drug                       |                            |                    | 0.00697            | BBC3,PMAIP1                                                                                                                        |                     |
| perhexiline                            |                | chemical drug                       |                            |                    | 0.0232             | DEPP1,LSS,SERPINA3                                                                                                                 |                     |
| chlorcyclizine                         |                | chemical drug                       |                            |                    | 0.0185             | DEPP1,LSS,SERPINA3                                                                                                                 |                     |
| rh-endostatin                          |                | chemical drug                       |                            |                    | 0.00354            | FAS,JUN,MAP1LC3B                                                                                                                   |                     |
| Cytochrome bc1                         |                | complex                             |                            |                    | 0.049              | MAOA                                                                                                                               |                     |
| CDKN2B-AS1                             |                | other                               |                            |                    | 0.0285             | CDKN2B,CXCL8,PTGS2                                                                                                                 |                     |
| zinc oxide                             |                | chemical drug                       |                            |                    | 0.0316             | MT1E,MT1X                                                                                                                          |                     |
| vanillyl-N-nonylamide                  |                | chemical drug                       |                            |                    | 0.0021             | ATF3,CCNG2,GADD45A                                                                                                                 |                     |
| sucralose                              |                | chemical reagent                    |                            |                    | 0.0135             | CEBPA,PPARG                                                                                                                        |                     |
| loxoprofen                             |                | chemical drug                       |                            |                    | 0.049              | MUC2                                                                                                                               |                     |
| tacedinaline                           |                | chemical drug                       |                            |                    | 0.0021             | ELF3,FOS,IGF2                                                                                                                      |                     |
| obatoxax                               |                | chemical drug                       |                            |                    | 0.0021             | ATF3,MCL1,PMAIP1                                                                                                                   |                     |
| PRC2                                   |                | complex                             |                            |                    | 0.024              | CEACAM1,CEACAM6,CXCL1,CXCL8,GATA6,MMP7                                                                                             |                     |
| G-Actin                                |                | group                               |                            |                    | 0.049              | JUN                                                                                                                                |                     |
| thyroid hormone receptor               |                | group                               |                            |                    | 0.0363             | CPT1A,FOS,KLF9,NR5A2                                                                                                               |                     |
| 3-iodothyronamine                      |                | chemical - endogenous mammalian     |                            |                    | 0.049              | IRS2                                                                                                                               |                     |
| 25-hydroxyvitamin D                    |                | chemical drug                       |                            |                    | 0.0024             | CYP24A1,VDR                                                                                                                        |                     |
| bendamustine                           |                | chemical drug                       |                            |                    | 0.00789            | AURKA,MCL1,PMAIP1                                                                                                                  | 367 (7)             |
| PKR dimer                              |                | complex                             |                            |                    | 0.049              | ATF3                                                                                                                               |                     |
| MAP2K4/7                               |                | group                               |                            |                    | 0.049              | PTGS2                                                                                                                              |                     |
| Retinoic acid-RAR-RXR                  |                | complex                             |                            |                    | 0.00546            | CRABP2,DUSP1,TGFB2                                                                                                                 |                     |
| bovine testicular hyaluronidase        |                | biologic drug                       |                            |                    | 0.049              | CD44                                                                                                                               |                     |
| dihydromethysticin                     |                | chemical - endogenous non-mammalian |                            |                    | 0.049              | CYP3A5                                                                                                                             |                     |
| NF279                                  |                | chemical reagent                    |                            |                    | 0.049              | CXCL8                                                                                                                              |                     |
| muraglitazar                           |                | chemical drug                       |                            |                    | 0.00697            | EDN1,REN                                                                                                                           | 302 (7)             |
| ZM 323881                              |                | chemical - kinase inhibitor         |                            |                    | 0.049              | RCAN1                                                                                                                              |                     |
| ALKBH5                                 |                | enzyme                              |                            |                    | 0.0232             | CAV1,CLU,DNAJA1,FYN,IGF2,JAG2,PRDX4,RGS2,SERPINA5                                                                                  |                     |
| LRRRC26                                |                | ion channel                         |                            |                    | 0.0316             | CXCL1,CXCL8                                                                                                                        |                     |
| GSK 189254                             |                | chemical drug                       |                            |                    | 0.049              | FOS                                                                                                                                |                     |
| MBNL3                                  |                | other                               |                            |                    | 0.0024             | ABLIM1,CD44                                                                                                                        |                     |
| INTS11                                 |                | other                               |                            |                    | 0.00697            | EGR1,FOSB                                                                                                                          |                     |
| trypsin                                |                | group                               |                            |                    | 0.0232             | CXCL8,FOS,PTGS2                                                                                                                    |                     |
| (-)-OSU 6162                           |                | chemical drug                       |                            |                    | 0.049              | FOS                                                                                                                                |                     |
| ASB9                                   |                | transcription regulator             |                            |                    | 0.049              | CKB                                                                                                                                |                     |
| RNF187                                 |                | enzyme                              |                            |                    | 0.0217             | HBEGF,JUN                                                                                                                          |                     |
| IGF2BP2                                |                | translation regulator               |                            |                    | 0.0135             | ELOVL6,LIMS2                                                                                                                       |                     |
| CYP2R1                                 |                | enzyme                              |                            |                    | 0.049              | VDR                                                                                                                                |                     |
| FIJD                                   |                | enzyme                              |                            |                    | 0.000452           | DNAJB1,HSPA1A/HSPA1B,HSPB1                                                                                                         |                     |
| Pad2                                   |                | other                               |                            |                    | 0.049              | PTGS2                                                                                                                              |                     |
| SLC22A2                                |                | transporter                         |                            |                    | 0.0217             | CPT1A,SLC22A5                                                                                                                      |                     |
| LPIN1                                  |                | phosphatase                         |                            |                    | 0.0144             | CEBPA,CPT1A,HMGR,PPARG,PTGS2                                                                                                       |                     |
| patulin                                |                | chemical toxicant                   |                            |                    | 0.0428             | ATF3,CYP1A1                                                                                                                        |                     |
| LGALS12                                |                | other                               |                            |                    | 0.0217             | CEBPA,PPARG                                                                                                                        |                     |
| RNF217-AS1                             |                | other                               |                            |                    | 0.049              | INTU                                                                                                                               |                     |
| pridopidine                            |                | chemical drug                       |                            |                    | 0.049              | FOS                                                                                                                                |                     |
| LINC01139                              |                | other                               |                            |                    | 0.0109             | EGR1,LDHA,SLC16A3                                                                                                                  |                     |
| PDCD10                                 |                | other                               |                            |                    | 0.0428             | KLF4,PROCR                                                                                                                         |                     |
| SSC5D                                  |                | transmembrane receptor              |                            |                    | 0.049              | CXCL8                                                                                                                              |                     |
| TMC8                                   |                | other                               |                            |                    | 0.049              | CIB1                                                                                                                               |                     |
| SLC27A4                                |                | transporter                         |                            |                    | 0.0135             | CEBPA,PPARG                                                                                                                        |                     |
| RHOJ                                   |                | enzyme                              |                            |                    | 0.00183            | AKAP12,ANXA1,CAV1,GSN,RND3                                                                                                         |                     |
| IL1RL2                                 |                | transmembrane receptor              |                            |                    | 0.0408             | CXCL1,CXCL2,CXCL8                                                                                                                  |                     |
| TFAP2D                                 |                | transcription regulator             |                            |                    | 0.049              | MT2A                                                                                                                               |                     |
| BSCL2                                  |                | other                               |                            |                    | 0.0393             | ACSL1,AKR1C3,CEBPA,GPD1,PNPLA2,PPARG,PTGS2                                                                                         |                     |
| NPC1                                   | 0.332          | transporter                         |                            |                    | 0.000345           | CAV1,CAV2,CD68,EGR1,HMGR,IDI1,KLF4,LGALS3,LIPG,LSS,MMP15,NPC1,PTGS2                                                                | 413 (17)            |
| MARCHF3                                |                | other                               |                            |                    | 0.0217             | CXCL1,CXCL8                                                                                                                        |                     |
| FBXO11                                 |                | enzyme                              |                            |                    | 0.049              | BCL6                                                                                                                               |                     |
| FBXO25                                 |                | enzyme                              |                            |                    | 0.0024             | EGR1,FOS                                                                                                                           | 127 (5)             |
| ZNF652                                 |                | other                               |                            |                    | 0.0428             | TGFB2,TGFB2                                                                                                                        |                     |
| APOL1                                  | 0.986          | transporter                         |                            |                    | 0.0144             | CXCL2,IFNGR2,MUC13                                                                                                                 |                     |
| TRIM29                                 |                | transcription regulator             |                            |                    | 0.0428             | CD44,PMAIP1                                                                                                                        |                     |
| CD3-TCR                                | -0.497         | complex                             |                            |                    | 0.049              | TOB1                                                                                                                               |                     |
| SRF-ELK1                               |                | complex                             |                            |                    | 0.049              | FOS                                                                                                                                |                     |
| Gpcr                                   |                | group                               |                            |                    | 0.0217             | FOS,JUN                                                                                                                            |                     |
| KREMEN1                                |                | other                               |                            |                    | 0.049              | AXIN2                                                                                                                              |                     |
| BCAS2                                  |                | other                               |                            |                    | 0.0217             | BBC3,PMAIP1                                                                                                                        |                     |
| H2BW2                                  |                | other                               |                            |                    | 0.049              | DNMT3A                                                                                                                             |                     |
| PCOLCE2                                |                | other                               |                            |                    | 0.049              | SCARB1                                                                                                                             |                     |
| SLC15A4                                |                | transporter                         |                            |                    | 0.049              | IRF7                                                                                                                               |                     |
| ATOH7                                  |                | other                               |                            |                    | 0.0217             | FGF19,SOX4                                                                                                                         |                     |
| ZC3H14                                 |                | other                               |                            |                    | 0.0478             | IL15RA,NMI,TSC22D1                                                                                                                 |                     |
| SLC51B                                 |                | transporter                         |                            |                    | 0.049              | NROB2                                                                                                                              |                     |
| ADTRP                                  |                | enzyme                              |                            |                    | 0.049              | TFPI                                                                                                                               |                     |
| RSP03                                  |                | kinase                              |                            |                    | 0.00789            | AXIN2,GLI1,PTGS2                                                                                                                   | 236 (7)             |
| STEAP1                                 | 0.932          | transporter                         |                            |                    | 0.0024             | CEBPA,PPARG                                                                                                                        |                     |
| PPIP5K1                                |                | phosphatase                         |                            |                    | 0.049              | RUNX2                                                                                                                              |                     |
| RNA5EH2A                               |                | enzyme                              |                            |                    | 0.0000303          | IFI35,IFI44,IFIH1,IFIT3,IFITM3,IFNGR2,IRF1,IRF7,NMI,PTGS2,TRIM21                                                                   |                     |
| PRDM5                                  |                | transcription regulator             |                            |                    | 0.00108            | APOBEC3B,CEMP,GADD45B,IDO2,MYB,NCOA7,OVOL1,PML,RUNX2,S100A2,STK32C,TINAGL1                                                         |                     |
| PRG3                                   |                | other                               |                            |                    | 0.049              | CXCL8                                                                                                                              |                     |
| PRKAG3                                 |                | other                               |                            |                    | 0.000519           | ACVR1,AMD1,ATP1B1,CCNDP1,CD55,EGR1,HIVEP2,KDM2B,KLF4,MAT2A,NEO1,NRIP1,RHOU,RNF128,SNCG,SORD,TSPAN8,UGT1A10 (includes others),ZFP36 |                     |
| HSPBP1                                 |                | other                               |                            |                    | 0.0135             | HSPA1A/HSPA1B,HSPA1L                                                                                                               |                     |
| FNDC3B                                 |                | other                               |                            |                    | 0.049              | RUNX2                                                                                                                              |                     |

Supplementary Table 4. Upstream regulator analysis based gene set enrichment analysis (GSEA) of differentially expressed genes (DEGs) after ATRA+PDT compared to PDT

| Upstream Regulator          | Expr Log Ratio | Molecule Type                       | Predicted Activation State | Activation z-score | p-value of overlap | Target Molecules in Dataset                                                                               | Mechanistic Network |
|-----------------------------|----------------|-------------------------------------|----------------------------|--------------------|--------------------|-----------------------------------------------------------------------------------------------------------|---------------------|
| RND2                        |                | enzyme                              |                            | 0.049              | 0.049              | RHOB                                                                                                      |                     |
| FCN1                        |                | other                               |                            | 0.049              | 0.049              | CXCL8                                                                                                     |                     |
| PPP2R2D                     |                | other                               |                            | 0.049              | 0.049              | PPARG                                                                                                     |                     |
| HCAR1                       | 0.404          | G-protein coupled receptor          |                            | 0.0185             | 0.0185             | EDN1,SLC16A1,SLC16A3                                                                                      |                     |
| POLR3G                      |                | enzyme                              |                            | 0.0232             | 0.0232             | AURKA,KLF6,S100A4                                                                                         |                     |
| procyanidin B2              |                | chemical - endogenous non-mammalian |                            | 0.049              | 0.049              | PTGS2                                                                                                     |                     |
| BUD23                       |                | enzyme                              |                            | 0.0217             | 0.0217             | CXCL8,TSC22D3                                                                                             |                     |
| TMEM184A                    |                | other                               |                            | 0.049              | 0.049              | DUSP1                                                                                                     |                     |
| B3GNT6                      |                | enzyme                              |                            | 0.049              | 0.049              | MUC2                                                                                                      |                     |
| UBN1                        |                | transcription regulator             |                            | 0.049              | 0.049              | CCNA2                                                                                                     |                     |
| LMAN1                       |                | other                               |                            | 0.049              | 0.049              | F5                                                                                                        |                     |
| IKBIP                       |                | other                               |                            | 0.0135             | 0.0135             | CXCL2,NFKBIZ                                                                                              |                     |
| USP9Y                       |                | peptidase                           |                            | 0.049              | 0.049              | MUC2                                                                                                      |                     |
| C1QL4                       |                | other                               |                            | 0.0024             | 0.0024             | CEBPA,PPARG                                                                                               |                     |
| IQCB1                       |                | other                               |                            | 0.049              | 0.049              | BBC3                                                                                                      |                     |
| CLDN9                       |                | other                               |                            | 0.049              | 0.049              | TJP1                                                                                                      |                     |
| ZMIZ2                       |                | transcription regulator             |                            | 0.00109            | 0.00109            | AXIN2,CD44,JUN                                                                                            |                     |
| Histone h4                  |                | group                               |                            | 0.00103            | 0.00103            | AKAP12,CDC25A,CXCL3,CXCL8,CYP24A1,DKK1,DUSP16,FOS,IRF1,KIF13B,NEDD4L,OAS3,PMAIP1,PPARG,PTGS2,RUNX2,TGFBR2 | 478 (20)            |
| CUZD1                       |                | other                               |                            | 0.0217             | 0.0217             | EREG,ID2                                                                                                  |                     |
| TRIM17                      |                | enzyme                              |                            | 0.049              | 0.049              | MCL1                                                                                                      |                     |
| ZNF580                      |                | transcription regulator             |                            | 0.049              | 0.049              | CXCL8                                                                                                     |                     |
| CCDC22                      |                | other                               |                            | 0.049              | 0.049              | BIRC3                                                                                                     |                     |
| MBOAT7                      | 0.307          | enzyme                              |                            | 0.0185             | 0.0185             | ACSS2,ELOVL6,HMGCR                                                                                        |                     |
| SELENOS                     |                | other                               |                            | 0.0343             | 0.0343             | CAV1,CEBPA,PPARG                                                                                          |                     |
| CIRBP                       | 0.347          | translation regulator               |                            | 0.0135             | 0.0135             | CXCL2,CXCL3                                                                                               |                     |
| IFNA17                      |                | cytokine                            |                            | 0.0285             | 0.0285             | EIF2AK2,IFIH1,PLAAT4                                                                                      |                     |
| potassium channel           |                | group                               |                            | 0.00697            | 0.00697            | FOS,JUN                                                                                                   |                     |
| sGC                         |                | complex                             |                            | 0.0217             | 0.0217             | EGR1,FOS                                                                                                  |                     |
| TCF/LEF                     |                | group                               |                            | 0.0343             | 0.0343             | JUN,PTGS2,RUNX2                                                                                           |                     |
| GPR39                       |                | G-protein coupled receptor          |                            | 0.0316             | 0.0316             | CLU,PNPLA2                                                                                                |                     |
| NAA30                       |                | enzyme                              |                            | 0.00697            | 0.00697            | FAS,PMAIP1                                                                                                |                     |
| GALNT4                      |                | enzyme                              |                            | 0.0428             | 0.0428             | SMAD3,TJP1                                                                                                |                     |
| EIF3M                       |                | other                               |                            | 0.0316             | 0.0316             | CDC25A,MT2A                                                                                               |                     |
| ARID2                       |                | transcription regulator             |                            | 0.0217             | 0.0217             | BMP4,FGFR2                                                                                                |                     |
| METTL8                      |                | enzyme                              |                            | 0.0024             | 0.0024             | CEBPA,PPARG                                                                                               |                     |
| MDGA2                       |                | other                               |                            | 0.0232             | 0.0232             | CASP9,FAS,SESN2                                                                                           |                     |
| CACNA1C                     |                | ion channel                         |                            | 0.00546            | 0.00546            | CAV1,PTGS2,S100A10                                                                                        | 163 (7)             |
| PIWIL4                      |                | other                               |                            | 0.0316             | 0.0316             | FGFR2,TGFBR2                                                                                              |                     |
| MLL11                       |                | other                               |                            | 0.049              | 0.049              | CD44                                                                                                      |                     |
| RGMB                        |                | other                               |                            | 0.0021             | 0.0021             | CXCL2,CXCL3,LCN2                                                                                          |                     |
| BATF2                       |                | other                               |                            | 0.0024             | 0.0024             | CCN1,JUN                                                                                                  | 296 (7)             |
| BCO1                        |                | enzyme                              |                            | 0.00287            | 0.00287            | ARRDC3,NR1D1,PPARG,SCARB1                                                                                 |                     |
| MAPKBP1                     |                | other                               |                            | 0.049              | 0.049              | CXCL8                                                                                                     |                     |
| ZG16B                       |                | other                               |                            | 0.049              | 0.049              | CXCR4                                                                                                     |                     |
| KCTD10                      |                | ion channel                         |                            | 0.049              | 0.049              | RHOB                                                                                                      |                     |
| Dcpp1 (includes others)     |                | other                               |                            | 0.049              | 0.049              | OTUD7B                                                                                                    |                     |
| NSD1                        |                | transcription regulator             |                            | 0.0343             | 0.0343             | BMP4,KLF6,ZFP36L1                                                                                         |                     |
| harman                      |                | chemical - endogenous non-mammalian |                            | 0.049              | 0.049              | CYP1A1                                                                                                    |                     |
| USP47                       |                | peptidase                           |                            | 0.049              | 0.049              | CDC25A                                                                                                    |                     |
| CPB1                        |                | peptidase                           |                            | 0.049              | 0.049              | CASP4                                                                                                     |                     |
| FGF14                       |                | growth factor                       |                            | 0.049              | 0.049              | FOS                                                                                                       |                     |
| CERK                        |                | kinase                              |                            | 0.0368             | 0.0368             | CLCF1,CXCL1,CXCL2,CXCL8,CXCR4                                                                             |                     |
| QRFP                        |                | other                               |                            | 0.00354            | 0.00354            | ACSL1,CEBPA,PPARG                                                                                         |                     |
| CDC73                       |                | other                               |                            | 0.0078             | 0.0078             | GATA2,HMGCS2,IGF2,IRF1,LGALS3                                                                             | 290 (7)             |
| CAMSAP2                     |                | other                               |                            | 0.049              | 0.049              | TJP1                                                                                                      |                     |
| DSC2                        |                | other                               |                            | 0.049              | 0.049              | CD44                                                                                                      |                     |
| TRPM3                       |                | ion channel                         |                            | 0.049              | 0.049              | EGR1                                                                                                      |                     |
| FAM3B                       |                | cytokine                            |                            | 0.0241             | 0.0241             | CASP4,CAV1,LCN2,LDHA                                                                                      |                     |
| KLHL21                      |                | other                               |                            | 0.00697            | 0.00697            | DUSP1,NFKBIZ                                                                                              |                     |
| MLXIP                       |                | transcription regulator             |                            | 0.0024             | 0.0024             | ARRDC4,TXNIP                                                                                              |                     |
| STEAP2                      | 0.777          | enzyme                              |                            | 0.0024             | 0.0024             | CEBPA,PPARG                                                                                               |                     |
| LRRC4                       |                | other                               |                            | 0.049              | 0.049              | STMN1                                                                                                     |                     |
| CCDC8                       |                | other                               |                            | 0.049              | 0.049              | BBC3                                                                                                      |                     |
| NSD2                        |                | enzyme                              |                            | 0.000426           | 0.000426           | BACE2,CDC25A,CXCR4,FOS,GADD45A,IRF7,JUN,PRKCA                                                             | 249 (7)             |
| FANK1                       |                | transcription regulator             |                            | 0.049              | 0.049              | JUN                                                                                                       |                     |
| SLC4A7                      |                | transporter                         |                            | 0.049              | 0.049              | SLC16A1                                                                                                   |                     |
| CLEC12A                     |                | other                               |                            | 0.0316             | 0.0316             | IFIT3,IRF7                                                                                                |                     |
| SBDS                        |                | other                               |                            | 0.000345           | 0.000345           | AKR1C1/AKR1C2,AKR1C3,CHAC1,DNAJB1,EGR1,FBXO32,FOS,GADD45B,HSPA6,MAFF,MAOA,MT2A,PPP1R15A                   | 398 (14)            |
| TCIM                        |                | other                               |                            | 0.00354            | 0.00354            | CXCL1,CXCL8,PTGS2                                                                                         | 441 (11)            |
| LTPB4                       | -0.661         | growth factor                       |                            | 0.00546            | 0.00546            | BMP4,ID2,TGFBR2                                                                                           |                     |
| Gata6os                     |                | other                               |                            | 0.049              | 0.049              | GATA6                                                                                                     |                     |
| Hedgehog                    |                | group                               |                            | 0.0106             | 0.0106             | CCNA2,FOXL1,GATA6,HOXA5,IGF2,KLF4,VIL1                                                                    |                     |
| Sapk                        |                | group                               |                            | 0.000452           | 0.000452           | FBXO32,FOS,GADD45A                                                                                        | 254 (10)            |
| GPX6                        |                | enzyme                              |                            | 0.049              | 0.049              | PPP1R1B                                                                                                   |                     |
| MBNL2                       |                | other                               |                            | 0.049              | 0.049              | ABLIM1                                                                                                    |                     |
| GPR68                       |                | G-protein coupled receptor          |                            | 0.0217             | 0.0217             | DUSP1,PTGS2                                                                                               |                     |
| nickel sulfide              |                | chemical reagent                    |                            | 0.049              | 0.049              | PTGS2                                                                                                     |                     |
| rimantadine                 |                | chemical drug                       |                            | 0.049              | 0.049              | CXCL8                                                                                                     |                     |
| Eif2                        |                | complex                             |                            | 0.0135             | 0.0135             | EIF2AK2,PTGS2                                                                                             |                     |
| sphingomyelinase            |                | group                               |                            | 0.0428             | 0.0428             | JUN,PTGS2                                                                                                 |                     |
| P-TEFb                      |                | complex                             |                            | 0.0135             | 0.0135             | BBC3,CXCL8                                                                                                |                     |
| black raspberry extract     |                | chemical drug                       |                            | 0.00943            | 0.00943            | ADAMTS6,AKR1B10,AMBIP,CD44,CLDN1,DUSP5,KRT20,MCL1,PIP5K1A,PLK3,SCEL,SLC30A1                               |                     |
| FAS-AS1                     |                | other                               |                            | 0.049              | 0.049              | FAS                                                                                                       |                     |
| Myosin2                     |                | complex                             |                            | 0.049              | 0.049              | PPARG                                                                                                     |                     |
| Pro-inflammatory Cytokine   |                | group                               |                            | 0.00699            | 0.00699            | ABCC2,ASS1,CD55,CLU,LCN2,LGALS9,LIPG,PI3,SDC4                                                             |                     |
| proanthocyanidin derivative |                | chemical - other                    |                            | 0.0135             | 0.0135             | CYP1A1,JUN                                                                                                |                     |
| Tpl2 kinase inhibitor       |                | chemical - kinase inhibitor         |                            | 0.049              | 0.049              | PTGS2                                                                                                     |                     |
| IL7R                        |                | transmembrane receptor              |                            | 0.00344            | 0.00344            | C1orf116,CXCL8,DAPK1,DPP4,FHL2,MCL1,MMRN2,PCSK6,PIM1,SKAP1,TJP3                                           |                     |
| TAF9                        |                | transcription regulator             |                            | 0.0217             | 0.0217             | CXCL8,IRF1                                                                                                |                     |
| cis-vaccenic acid           |                | chemical - endogenous mammalian     |                            | 0.049              | 0.049              | PNPLA2                                                                                                    |                     |
| iguratimod                  |                | chemical drug                       |                            | 0.0428             | 0.0428             | CXCL2,CXCL3                                                                                               |                     |
| IDH2                        |                | enzyme                              |                            | 0.00387            | 0.00387            | CEBPA,EGR1,PPARG,TGFBR2                                                                                   | 248 (7)             |
| hispidulin                  |                | chemical drug                       |                            | 0.049              | 0.049              | EGR1                                                                                                      |                     |
| urotensin II                |                | biologic drug                       |                            | 0.0428             | 0.0428             | CXCL8,SMAD3                                                                                               |                     |
| NNZ 2566                    |                | biologic drug                       |                            | 0.049              | 0.049              | ATF3                                                                                                      |                     |
| neurotrophin                |                | chemical drug                       |                            | 0.049              | 0.049              | SEMA3A                                                                                                    |                     |
| vasopressins                |                | biologic drug                       |                            | 0.049              | 0.049              | FOS                                                                                                       |                     |
| firtecan pegol              |                | chemical drug                       |                            | 0.0135             | 0.0135             | CA9,CXCR4                                                                                                 |                     |
| pycnogenols                 |                | chemical drug                       |                            | 0.00697            | 0.00697            | CXCL8,PTGS2                                                                                               |                     |
| HCV 796                     |                | chemical drug                       |                            | 0.049              | 0.049              | MAP1LC3B                                                                                                  |                     |
| mediator                    |                | complex                             |                            | 0.049              | 0.049              | FOS                                                                                                       |                     |
| 7S NGF                      |                | complex                             |                            | 0.0217             | 0.0217             | CLU,FOS                                                                                                   |                     |

Supplementary Table 4. Upstream regulator analysis based gene set enrichment analysis (GSEA) of differentially expressed genes (DEGs) after ATRA+PDT compared to PDT

| Upstream Regulator                            | Expr Log Ratio | Molecule Type                       | Predicted Activation State | Activation z-score | p-value of overlap | Target Molecules in Dataset                                                                                                                | Mechanistic Network |
|-----------------------------------------------|----------------|-------------------------------------|----------------------------|--------------------|--------------------|--------------------------------------------------------------------------------------------------------------------------------------------|---------------------|
| Ppp2c                                         |                | group                               |                            |                    | 0.0232             | CDKN2B,DUSP1,PIM1                                                                                                                          |                     |
| p85 (pi3r)                                    |                | group                               |                            |                    | 0.0478             | MCL1,PPARG,PTGS2                                                                                                                           |                     |
| Mucin                                         |                | group                               |                            |                    | 0.0217             | CXCL8,PTGS2                                                                                                                                |                     |
| Pik3r                                         |                | group                               |                            |                    | 0.0316             | BBC3,CXCL8                                                                                                                                 |                     |
| Rho gdi                                       |                | group                               |                            |                    | 0.049              | RHOB                                                                                                                                       |                     |
| LAMTOR5                                       |                | other                               |                            |                    | 0.0232             | CXCL8,LDHA,S100A4                                                                                                                          |                     |
| BCOR                                          |                | transcription regulator             |                            |                    | 0.0207             | ARID5B,ETV6,GLI1,GLI2                                                                                                                      |                     |
| PMF1/PMF1-BGLAP                               |                | transcription regulator             |                            |                    | 0.049              | SAT1                                                                                                                                       |                     |
| ASCL2                                         |                | transcription regulator             |                            |                    | 0.0428             | CXCR4,EGR1                                                                                                                                 |                     |
| FLII                                          |                | other                               |                            |                    | 0.0135             | CLDN1,CXCL8                                                                                                                                |                     |
| MEIS2                                         | 0.552          | transcription regulator             |                            |                    | 0.0316             | CDKN2B,ETV1                                                                                                                                |                     |
| PF-4523655                                    |                | biologic drug                       |                            |                    | 0.049              | DDIT4                                                                                                                                      |                     |
| PDGFD                                         |                | growth factor                       |                            |                    | 0.0428             | CXCR4,PTGS2                                                                                                                                |                     |
| cucurbitacin E                                |                | chemical - endogenous non-mammalian |                            |                    | 0.049              | PTGS2                                                                                                                                      |                     |
| bitertanol                                    |                | chemical drug                       |                            |                    | 0.0135             | CYP1A1,CYP3A5                                                                                                                              |                     |
| ARHGEF17                                      |                | other                               |                            |                    | 0.049              | FOS                                                                                                                                        |                     |
| interferon beta-1a                            |                | biologic drug                       |                            |                    | 0.0011             | ATP5MC3,CXCR4,DNAJA1,DNAJB1,GADD45B,IFI35,IL1RN,IRF1,IRF7,NMI,PSMB8,PSME1,SERPINA1,TBXAS1,UOCRFS1                                          | 219 (8)             |
| idelalisib                                    |                | chemical drug                       |                            |                    | 0.0428             | MCL1,UGCG                                                                                                                                  |                     |
| IER3                                          |                | other                               |                            |                    | 0.0428             | BIRC3,MCL1                                                                                                                                 |                     |
| RAB11FIP3                                     |                | other                               |                            |                    | 0.0135             | FOS,JUN                                                                                                                                    |                     |
| ANTXR1                                        |                | transmembrane receptor              |                            |                    | 0.049              | HSPA1A/HSPA1B                                                                                                                              |                     |
| pidilizumab                                   |                | biologic drug                       |                            |                    | 0.049              | CXCR4                                                                                                                                      |                     |
| Atf                                           |                | group                               |                            |                    | 0.0217             | JUN,PTGS2                                                                                                                                  |                     |
| DIO1                                          |                | enzyme                              |                            |                    | 0.0135             | SLC16A1,SLC16A3                                                                                                                            |                     |
| NCOR2                                         |                | transcription regulator             |                            |                    | 0.0017             | AXIN2,BIRC3,CEBPA,CTSS,CXCL8,FOS,HBEGF,JUN,PTGS2                                                                                           | 506 (25)            |
| MEDI-547                                      |                | biologic drug                       |                            |                    | 0.049              | EPHA2                                                                                                                                      |                     |
| PF-4691502                                    |                | chemical drug                       |                            |                    | 0.0135             | BBC3,PMAIP1                                                                                                                                |                     |
| GSK0660                                       |                | chemical reagent                    |                            |                    | 0.0428             | FBXO32,PKD4                                                                                                                                |                     |
| NELFB                                         |                | other                               |                            |                    | 0.0185             | ATF3,GADD45A,GADD45B                                                                                                                       |                     |
| cercosporin                                   |                | chemical - endogenous non-mammalian |                            |                    | 0.0109             | AXIN2,CDC25A,DKK1                                                                                                                          |                     |
| IGF2R                                         |                | transmembrane receptor              |                            |                    | 0.0109             | IGF2,NEDD9,NPC1                                                                                                                            |                     |
| APOA4                                         |                | transporter                         |                            |                    | 0.0285             | DGAT2,FOS,SCARB1                                                                                                                           |                     |
| TMC6                                          |                | transporter                         |                            |                    | 0.049              | CIB1                                                                                                                                       |                     |
| GTF2H2                                        |                | transcription regulator             |                            |                    | 0.049              | KLIF9                                                                                                                                      |                     |
| SYTL4                                         |                | transporter                         |                            |                    | 0.049              | STX1A                                                                                                                                      |                     |
| FAK4                                          |                | kinase                              |                            |                    | 0.0185             | NOX1,PPARG,TJP1                                                                                                                            |                     |
| NOD1                                          |                | other                               |                            |                    | 0.0123             | CARD6,CXCL2,CXCL8,DUSP1                                                                                                                    |                     |
| RAP1GAP                                       | -0.574         | other                               |                            |                    | 0.0428             | CDK6,FOS                                                                                                                                   |                     |
| GPLD1                                         |                | enzyme                              |                            |                    | 0.049              | LGALS3BP                                                                                                                                   |                     |
| MBNL1                                         |                | other                               |                            |                    | 0.0185             | ABLIM1,SOX4,TGFB2                                                                                                                          |                     |
| GNA14                                         | -0.765         | enzyme                              |                            |                    | 0.000000306        | AKAP12,ATF3,BMP4,CSPG4,CXCL3,CXCL8,DUSP5,GADD45A,HBEGF,IL1RN,KLF6,LIF,PHLDA1,PTGS2,SGK1,ZFP36L1                                            | 309 (14)            |
| REV1                                          |                | enzyme                              |                            |                    | 0.00354            | BBC3,PMAIP1,SES2                                                                                                                           | 367 (7)             |
| ITGA5                                         |                | transmembrane receptor              |                            |                    | 0.0317             | CD44,FOS,IGF2,IGFBP2,JUN,TGFB2                                                                                                             |                     |
| CD244                                         |                | transmembrane receptor              |                            |                    | 0.0109             | CXCL8,EGR1,FOS                                                                                                                             |                     |
| EDN2                                          |                | growth factor                       |                            |                    | 0.049              | PTGS2                                                                                                                                      |                     |
| TLX1                                          |                | transcription regulator             |                            |                    | 0.0461             | GATA2,MCL1,MYB,NMI                                                                                                                         |                     |
| YWHAQ                                         |                | other                               |                            |                    | 0.00507            | CASP7,CASP9,ETV1,MMP7                                                                                                                      |                     |
| CTF1                                          |                | cytokine                            |                            |                    | 0.00863            | CEBPD,FOS,IRF1,PNPLA2,PPARG,SERPINA3                                                                                                       | 506 (19)            |
| OPRK1                                         |                | G-protein coupled receptor          |                            |                    | 0.0021             | FOS,NRP1,PLXND1                                                                                                                            | 297 (7)             |
| AHRR                                          |                | transcription regulator             |                            |                    | 0.049              | CYP1A1                                                                                                                                     |                     |
| FAF1                                          |                | other                               |                            |                    | 0.00109            | AXIN2,DKK1,RUNX2                                                                                                                           | 289 (7)             |
| KIFAP3                                        |                | other                               |                            |                    | 0.049              | FOS                                                                                                                                        |                     |
| TFDP1                                         |                | transcription regulator             |                            |                    | 0.0299             | CASP7,CASP9,FGFR2,MYB,STMN1                                                                                                                |                     |
| RAB27A                                        |                | enzyme                              |                            |                    | 0.049              | CD44                                                                                                                                       |                     |
| AGR2                                          | -0.77          | other                               |                            |                    | 0.0428             | EGR1,FOS                                                                                                                                   |                     |
| LGALS8                                        |                | other                               |                            |                    | 0.0109             | CXCL1,CXCL3,CXCL8                                                                                                                          |                     |
| ZBTB33                                        |                | transcription regulator             |                            |                    | 0.000557           | BBC3,BCL6,FAS,MMP7,S100A4                                                                                                                  |                     |
| PPY                                           |                | other                               |                            |                    | 0.049              | FOS                                                                                                                                        |                     |
| PROK2                                         |                | other                               |                            |                    | 0.0316             | CDC25A,FOS                                                                                                                                 |                     |
| IDH1                                          |                | enzyme                              |                            |                    | 0.013              | EGR1,GLI1,PPARG,PPP1R15A,RUNX2,SERPINH1,TGFB2                                                                                              |                     |
| POU2F1                                        |                | transcription regulator             |                            |                    | 0.00262            | ACSL1,BBC3,BCL6,CD55,CXCL8,CYP1A1,CYP2B6,DDIT4,FRRS1,GADD45A,JUND,PDE9A,REL,SES2                                                           | 412 (12)            |
| RXRβ                                          |                | ligand-dependent nuclear receptor   |                            |                    | 0.00288            | ACSL1,ALDH1A1,CTSS,CYP24A1,ECM1,FLRT3,HBEGF,IGFBP6,LCN2,S100A4                                                                             | 353 (13)            |
| LINC01370                                     |                | other                               |                            |                    | 0.049              | GLIS3                                                                                                                                      |                     |
| LINC01503                                     |                | other                               |                            |                    | 0.049              | FOSL1                                                                                                                                      |                     |
| entolimod                                     |                | biologic drug                       |                            |                    | 0.0316             | CXCL2,CXCL3                                                                                                                                |                     |
| WBP11                                         |                | phosphatase                         |                            |                    | 0.049              | TUBGCP6                                                                                                                                    |                     |
| GPHA2                                         |                | other                               |                            |                    | 0.049              | FOS                                                                                                                                        |                     |
| SYMPK                                         |                | other                               |                            |                    | 0.0024             | CLDN2,TJP1                                                                                                                                 |                     |
| dodecylbenzenesulfonic acid                   |                | chemical reagent                    |                            |                    | 0.049              | Pi3                                                                                                                                        |                     |
| cyproconazole                                 |                | chemical drug                       |                            |                    | 0.0024             | CYP2B6,GADD45B                                                                                                                             |                     |
| recombinant interferon alpha                  |                | biologic drug                       |                            |                    | 0.049              | RNF213                                                                                                                                     |                     |
| SNX9                                          |                | transporter                         |                            |                    | 0.049              | ADAM9                                                                                                                                      |                     |
| OSMR                                          |                | transmembrane receptor              |                            |                    | 0.00345            | BCL3,BIRC3,CASP4,CXCL2,FOS,PIM1,SBNO2,SERPINA1,ZFP36                                                                                       | 394 (18)            |
| KSR2                                          |                | kinase                              |                            |                    | 0.049              | CXCL8                                                                                                                                      |                     |
| CIC                                           |                | transcription regulator             |                            |                    | 0.0185             | ETV1,FOSL1,MAFF                                                                                                                            |                     |
| NMB                                           |                | other                               |                            |                    | 0.0024             | FOS,JUN                                                                                                                                    | 444 (22)            |
| MPZ                                           |                | other                               |                            |                    | 0.00000241         | DNAJC3,HMGCR,ID2,JUN,PPP1R15A,SDF2L1,SOX4,SQLE                                                                                             |                     |
| NFYB                                          |                | transcription regulator             |                            |                    | 0.0139             | AMD1,APOBEC3B,CAV1,CDC25A,CHPT1,DPP4,FAS,FGFR2,FRYL,GADD45A,GPR160,KDM8,PAQR5,PITPNM3,RHOB,RUNX2,S100A4,SCARB1,SLC25A28,SLC39A8,TGFB2,TJP1 |                     |
| CDK5R1                                        |                | kinase                              |                            |                    | 0.0123             | CXCL8,FOS,PMAIP1,PPP1R1B                                                                                                                   |                     |
| LY96                                          |                | transmembrane receptor              |                            |                    | 0.0408             | CXCL2,CXCL3,CXCL8                                                                                                                          |                     |
| LBP                                           |                | transporter                         |                            |                    | 0.0478             | CXCL3,CXCL8,IL1RN                                                                                                                          |                     |
| DAB2IP                                        |                | other                               |                            |                    | 0.0109             | CD44,CLU,EGR1                                                                                                                              |                     |
| GNE                                           |                | kinase                              |                            |                    | 0.0428             | CHAC1,JDP2                                                                                                                                 |                     |
| PIAS2                                         | -0.386         | transcription regulator             |                            |                    | 0.0185             | CDKN2B,FOS,IRF1                                                                                                                            |                     |
| DAB2                                          |                | other                               |                            |                    | 0.0428             | FOS,HMGCR                                                                                                                                  |                     |
| PHF19                                         |                | other                               |                            |                    | 0.0135             | FGF19,HOXA5                                                                                                                                |                     |
| LOC102724788/PRODH                            | -1.858         | enzyme                              |                            |                    | 0.0217             | LOC102724788/PRODH,PTGS2                                                                                                                   |                     |
| CHRM3                                         |                | G-protein coupled receptor          |                            |                    | 0.0144             | CCN1,EGR1,FOS                                                                                                                              |                     |
| SMC3                                          |                | other                               |                            |                    | 0.0343             | CCNG2,IRS2,SOX4                                                                                                                            |                     |
| PNN                                           |                | other                               |                            |                    | 0.0343             | GDF15,JUN,MMP7                                                                                                                             |                     |
| MDM4                                          |                | transcription regulator             |                            |                    | 0.0478             | BBC3,HIPK2,LGALS3                                                                                                                          |                     |
| Lysosomal Protease                            |                | group                               |                            |                    | 0.049              | MAP1LC3B                                                                                                                                   |                     |
| miR-338-5p (miRNAs w/seed ACAUAU)             |                | mature microRNA                     |                            |                    | 0.049              | SPINK1                                                                                                                                     |                     |
| mir-338                                       |                | microRNA                            |                            |                    | 0.0217             | RUNX2,SPINK1                                                                                                                               |                     |
| miR-516a-5p (miRNAs w/seed UCUCGAG)           |                | mature microRNA                     |                            |                    | 0.049              | KLK10                                                                                                                                      |                     |
| mir-506                                       |                | microRNA                            |                            |                    | 0.0428             | CXCL8,SPDEF                                                                                                                                |                     |
| mir-488                                       |                | microRNA                            |                            |                    | 0.0217             | ADAM9,CXCL8                                                                                                                                |                     |
| miR-27b-5p (miRNAs w/seed GAGCUUA)            |                | mature microRNA                     |                            |                    | 0.049              | ATP2B1                                                                                                                                     |                     |
| mir-196                                       |                | microRNA                            |                            |                    | 0.0343             | ANXA1,FOS,HMGA2                                                                                                                            |                     |
| miR-293-3p (miRNAs w/seed GUGCCGC)            |                | mature microRNA                     |                            |                    | 0.049              | DKK1                                                                                                                                       |                     |
| miR-467a-5p (and other miRNAs w/seed AAGUGCC) |                | mature microRNA                     |                            |                    | 0.049              | DKK1                                                                                                                                       |                     |
| miR-129-5p (and other miRNAs w/seed UUUUUGC)  |                | mature microRNA                     |                            |                    | 0.0343             | DNMT3A,ETV6,SOX4                                                                                                                           |                     |

Supplementary Table 4. Upstream regulator analysis based gene set enrichment analysis (GSEA) of differentially expressed genes (DEGs) after ATRA+PDT compared to PDT

| Upstream Regulator                                 | Expr Log Ratio | Molecule Type              | Predicted Activation State | Activation z-score | p-value of overlap | Target Molecules in Dataset                                                                                                                 | Mechanistic Network |
|----------------------------------------------------|----------------|----------------------------|----------------------------|--------------------|--------------------|---------------------------------------------------------------------------------------------------------------------------------------------|---------------------|
| mir-129                                            |                | microRNA                   |                            |                    | 0.049              | CXCL8                                                                                                                                       |                     |
| mir-345                                            |                | microRNA                   |                            |                    | 0.049              | ABCC1                                                                                                                                       |                     |
| mir-193a-3p (and other miRNAs w/seed ACUGGCC)      |                | mature microRNA            |                            |                    | 0.0144             | ETS1,MCL1,RPS6KB2                                                                                                                           |                     |
| mir-489                                            |                | microRNA                   |                            |                    | 0.0217             | ADAM9,MMP7                                                                                                                                  |                     |
| miR-135a-5p (and other miRNAs w/seed AUGGCUU)      |                | mature microRNA            |                            |                    | 0.0285             | PPARG,RUNX2,TRPS1                                                                                                                           |                     |
| miR-125a-3p (miRNAs w/seed CAGGUGA)                |                | mature microRNA            |                            |                    | 0.049              | FYN                                                                                                                                         |                     |
| miR-605-5p (miRNAs w/seed AAUCC)                   |                | mature microRNA            |                            |                    | 0.049              | SEC24D                                                                                                                                      |                     |
| miR-142-5p (and other miRNAs w/seed AUAAAGU)       |                | mature microRNA            |                            |                    | 0.049              | TGFBR2                                                                                                                                      |                     |
| miR-23a-5p (and other miRNAs w/seed GGGUCC)        |                | mature microRNA            |                            |                    | 0.049              | LOC102724788/PRODH                                                                                                                          |                     |
| miR-186-5p (miRNAs w/seed AAAGAAU)                 |                | mature microRNA            |                            |                    | 0.0144             | AURKA,HMGA2,TGFBR2                                                                                                                          |                     |
| miR-328-3p (and other miRNAs w/seed UGGCCCU)       |                | mature microRNA            |                            |                    | 0.0135             | CD44,CEBPA                                                                                                                                  |                     |
| mir-199                                            |                | microRNA                   |                            |                    | 0.0408             | DNMT3A,EDN1,EGLN1                                                                                                                           |                     |
| miR-690 (miRNAs w/seed AAGGCUA)                    |                | mature microRNA            |                            |                    | 0.049              | CEBPA                                                                                                                                       |                     |
| Mir690                                             |                | microRNA                   |                            |                    | 0.049              | CEBPA                                                                                                                                       |                     |
| miR-130a-3p (and other miRNAs w/seed AGUGCAA)      |                | mature microRNA            |                            |                    | 0.0343             | CXCL2,CXCL3,HOXA5                                                                                                                           |                     |
| mir-205                                            |                | microRNA                   |                            |                    | 0.0478             | AXIN2,INPPL1,RUNX2                                                                                                                          |                     |
| miR-197-3p (and other miRNAs w/seed UCACCAC)       |                | mature microRNA            |                            |                    | 0.0428             | ACVR1,TGFBR2                                                                                                                                |                     |
| mir-663                                            |                | microRNA                   |                            |                    | 0.0024             | CXCR4,HSPG2                                                                                                                                 |                     |
| mir-1301                                           |                | microRNA                   |                            |                    | 0.049              | KLF6                                                                                                                                        |                     |
| mir-887                                            |                | microRNA                   |                            |                    | 0.049              | PLD2                                                                                                                                        |                     |
| MED15                                              | 0.292          | transcription regulator    |                            |                    | 0.00789            | BBC3,LIMA1,S100A2                                                                                                                           |                     |
| MIR3619                                            |                | microRNA                   |                            |                    | 0.049              | PLD2                                                                                                                                        |                     |
| KREMEN2                                            |                | other                      |                            |                    | 0.049              | AXIN2                                                                                                                                       |                     |
| PPP1R13B                                           |                | phosphatase                |                            |                    | 0.0217             | BBC3,LATS2                                                                                                                                  |                     |
| TRIM28                                             |                | transcription regulator    |                            |                    | 0.0452             | CASP7,CXCR4,ETS1,MYEOV,PMAIP1,RCAN1,S100A4                                                                                                  |                     |
| RGS19                                              |                | enzyme                     |                            |                    | 0.00546            | AXIN2,BMP4,DKK1                                                                                                                             |                     |
| MLK                                                |                | group                      |                            |                    | 0.049              | MMP7                                                                                                                                        |                     |
| NUCB2                                              | -0.489         | other                      |                            |                    | 0.0316             | FOS,PTGS2                                                                                                                                   |                     |
| RIPK4                                              |                | kinase                     |                            |                    | 0.0217             | GRHL3,OVOL1                                                                                                                                 |                     |
| HOXB9                                              |                | transcription regulator    |                            |                    | 0.0101             | CXCL8,EREG,REN,TGFB2                                                                                                                        |                     |
| WSB1                                               |                | other                      |                            |                    | 0.0217             | CA9,HIPK2                                                                                                                                   |                     |
| ABHD5                                              |                | enzyme                     |                            |                    | 0.0316             | PKD4,PNPLA2                                                                                                                                 |                     |
| ANXA4                                              |                | other                      |                            |                    | 0.049              | CXCL8                                                                                                                                       |                     |
| Is3                                                |                | other                      |                            |                    | 0.0217             | EGR1,IRS2                                                                                                                                   |                     |
| HBP1                                               |                | transcription regulator    |                            |                    | 0.0232             | H1-0,PIM1,PTGS2                                                                                                                             |                     |
| TIAL1                                              |                | transcription regulator    |                            |                    | 0.0217             | MAP1LC3B,TIA1                                                                                                                               |                     |
| NPVF                                               |                | other                      |                            |                    | 0.049              | FOS                                                                                                                                         |                     |
| KRT14                                              |                | other                      |                            |                    | 0.00984            | CXCL1,CXCL8,GJB2,CLK10,CLK6,MMP7                                                                                                            | 299 (7)             |
| RCE1                                               |                | peptidase                  |                            |                    | 0.0488             | B2M,GPC4,HBEGF,RCN1,TGFB2                                                                                                                   |                     |
| HDAC3                                              |                | transcription regulator    |                            |                    | 0.0192             | BIRC3,CD55,CXCL2,CXCL8,ELOVL6,FOS,LGALS9,ME1,PHLPP1,PTGS2                                                                                   |                     |
| miR-211-3p (miRNAs w/seed CAGGGAC)                 |                | mature microRNA            |                            |                    | 0.049              | CDK6                                                                                                                                        |                     |
| MTA2                                               |                | transcription regulator    |                            |                    | 0.0363             | GATA2,ID2,JUN,SQLE                                                                                                                          |                     |
| IL1R2                                              | -0.516         | transmembrane receptor     |                            |                    | 0.0144             | CXCL2,CXCL3,CXCL8                                                                                                                           |                     |
| F10                                                |                | peptidase                  |                            |                    | 0.0285             | CCN1,CXCL8,EGR1                                                                                                                             |                     |
| ATN1                                               |                | transcription regulator    |                            |                    | 0.0145             | ATP1B1,ATP1B3,BCL6,CCNDBP1,ETV1,GRK5,GSN,HBEGF,MCAM,PSME1,SOX4,STMN1,TUBA4A                                                                 |                     |
| DRD1                                               |                | G-protein coupled receptor |                            |                    | 0.00207            | EGR1,FOS,FOSB,S100A10                                                                                                                       | 441 (20)            |
| TLE1                                               |                | transcription regulator    |                            |                    | 0.0000174          | ATF3,DUSP1,EGR1,FOS,MCL1,MEIS2                                                                                                              | 313 (7)             |
| Scd2                                               |                | enzyme                     |                            |                    | 0.049              | PPARG                                                                                                                                       |                     |
| BORCS8-MEF2B                                       |                | transcription regulator    |                            |                    | 0.049              | JUN                                                                                                                                         |                     |
| HCRT                                               |                | other                      |                            |                    | 0.0109             | EGR1,FOS,KITLG                                                                                                                              |                     |
| GJA5                                               |                | transporter                |                            |                    | 0.049              | REN                                                                                                                                         |                     |
| RBX1                                               |                | enzyme                     |                            |                    | 0.0428             | MCL1,RHOB                                                                                                                                   |                     |
| UTS2                                               |                | other                      |                            |                    | 0.0217             | FOS,HPGD                                                                                                                                    |                     |
| eprenetapopt                                       |                | chemical drug              |                            |                    | 0.0368             | BBC3,CARD10,GADD45B,MCL1,PMAIP1                                                                                                             |                     |
| pituitary adenylate cyclase-activating polypeptide |                | biologic drug              |                            |                    | 0.00102            | ACER2,AKR1B10,AXIN2,EGR1,ERRF1,FOSL1,FRRS1,MACROD1                                                                                          |                     |
| SLC30A9                                            |                | transporter                |                            |                    | 0.049              |                                                                                                                                             |                     |
| CAMK2                                              |                | group                      |                            |                    | 0.049              | CYP1A1                                                                                                                                      |                     |
| IL4I1                                              |                | enzyme                     |                            |                    | 0.00789            | BIRC3                                                                                                                                       |                     |
| DLC1                                               |                | other                      |                            |                    | 0.00354            | CXCL1,CXCL8,TOB1                                                                                                                            | 211 (7)             |
| UGT2B4                                             |                | enzyme                     |                            |                    | 0.049              | CDK6,CDKN2B,S100A10                                                                                                                         |                     |
| Nisch                                              |                | other                      |                            |                    | 0.0316             | NROB2                                                                                                                                       |                     |
| SIGLEC7                                            |                | transmembrane receptor     |                            |                    | 0.049              | FAS,FOS                                                                                                                                     |                     |
| SIGLEC9                                            |                | other                      |                            |                    | 0.049              | PTGS2                                                                                                                                       |                     |
| ZNF613                                             |                | transcription regulator    |                            |                    | 0.049              | PTGS2                                                                                                                                       |                     |
| COL4A2                                             |                | other                      |                            |                    | 0.049              | ID2                                                                                                                                         |                     |
| LY6D                                               |                | other                      |                            |                    | 0.049              | FAS                                                                                                                                         |                     |
| COX4I1                                             |                | enzyme                     |                            |                    | 0.0285             | TSTA3                                                                                                                                       |                     |
| FOXC1                                              |                | transcription regulator    |                            |                    | 0.0279             | PDK4,TGFB2,TSPAN8                                                                                                                           |                     |
| GNB2                                               |                | enzyme                     |                            |                    | 0.00863            | CXCR4,MMP7,RUNX2,TSC22D1                                                                                                                    |                     |
| ELK4                                               |                | transcription regulator    |                            |                    | 0.00287            | CXCL3,DUSP1,FOSB,IL1R2,JAG2,TSC22D3                                                                                                         |                     |
| PPM1B                                              |                | phosphatase                |                            |                    | 0.0428             | EGR1,FOS,FOSL1,NCOA7                                                                                                                        | 250 (12)            |
| BCAR1                                              |                | enzyme                     |                            |                    | 0.0232             | CEBPD,HBEGF                                                                                                                                 |                     |
| XIAP                                               |                | enzyme                     |                            |                    | 0.0363             | CDKN2B,EGR1,MMP7                                                                                                                            |                     |
| ITGA1                                              |                | other                      |                            |                    | 0.0279             | CDK6,CXCL1,CXCL8,PTGS2                                                                                                                      |                     |
| SUPT16H                                            |                | transcription regulator    |                            |                    | 0.0363             | CAV1,MMP7,PPARG,PTGS2                                                                                                                       |                     |
| DDB2                                               |                | other                      |                            |                    | 0.0185             | DUSP5,EGR1,HSPA1A/HSPA1B,ID2                                                                                                                |                     |
| GCLC                                               |                | enzyme                     |                            |                    | 0.000452           | BBC3,EIF2AK2,SEMA3A                                                                                                                         |                     |
| SSPN                                               |                | other                      |                            |                    | 0.0316             | FOS,JUN,SLC39A8                                                                                                                             | 231 (7)             |
| RNGTT                                              |                | phosphatase                |                            |                    | 0.049              | CEACAM5,PTGS2                                                                                                                               |                     |
| MAPKAP1                                            |                | other                      |                            |                    | 0.0408             | SCARB1                                                                                                                                      |                     |
| RAD51AP1                                           |                | other                      |                            |                    | 0.0316             | CXCR4,DAPK1,SLFN5                                                                                                                           |                     |
| FABP2                                              |                | transporter                |                            |                    | 0.0232             | CD44,KLF4                                                                                                                                   |                     |
| INSIG2                                             |                | other                      |                            |                    | 0.0343             | CPT1A,HMGCR,PPARG                                                                                                                           |                     |
| GPI                                                |                | enzyme                     |                            |                    | 0.0478             | ELOVL6,HMGCR,INSIG1                                                                                                                         |                     |
| LIMA1                                              | 0.456          | other                      |                            |                    | 0.0144             | CAV1,CXCL8,STEAP4                                                                                                                           |                     |
| PIAS4                                              |                | transcription regulator    |                            |                    | 0.0343             | ID2,MMP7,VDR                                                                                                                                |                     |
| PIKfyve                                            |                | kinase                     |                            |                    | 0.0144             | CXCL2,IRF1,PKD4                                                                                                                             |                     |
| SLC22A1                                            |                | transporter                |                            |                    | 0.0428             | ALDH1A1,ATF3,MAP1LC3B                                                                                                                       |                     |
| RPS6KA4                                            |                | kinase                     |                            |                    | 0.0185             | CPT1A,SLC22A5                                                                                                                               |                     |
| WNK4                                               | -0.875         | kinase                     |                            |                    | 0.0217             | DUSP1,FOS,JUN                                                                                                                               |                     |
| ADRA1B                                             |                | G-protein coupled receptor |                            |                    | 0.029              | CFTR,WNK4                                                                                                                                   |                     |
| ADRA1A                                             |                | G-protein coupled receptor |                            |                    | 0.00316            | CEBPD,DUSP1,EGR1,FOS,JUN,LIF                                                                                                                | 461 (23)            |
| KCNE3                                              | 1.117          | ion channel                |                            |                    | 0.000104           | AKR1C3,CDHR5,CSRNP1,EPN3,FOSB,HMGCS2,HSPA1A/HSPA1B,KCNK5,KLF4,PHLDA1,PLK3,PTGS2                                                             |                     |
| ADRA1D                                             |                | G-protein coupled receptor |                            |                    | 0.029              | CEBPD,DUSP1,EGR1,FOS,JUN,LIF                                                                                                                |                     |
| ONECUT1                                            |                | transcription regulator    |                            |                    | 0.00156            | AMBPD,CDC25A,CEBPA,CEBPD,CLDN2,CXCL1,CXCL3,EHF,FAS,GSTA4,HMGCR,HNF4A,HSPA1A/HSPA1B,HSPH1,KDM8,LAMC2,MYOF,NROB2,PMAIP1,RARG,RBM48,SERPINA1,S | 141 (5)             |
| TNPO2                                              |                | transporter                |                            |                    | 0.049              | CXCL8                                                                                                                                       |                     |
| PFFKB2                                             |                | kinase                     |                            |                    | 0.049              | PDK4                                                                                                                                        |                     |
| Zfp54                                              |                | other                      |                            |                    | 0.049              | PPARG                                                                                                                                       |                     |
| GATAD2B                                            |                | transcription regulator    |                            |                    | 0.0024             | CXCL8,PTGS2                                                                                                                                 |                     |
| MEOX1                                              |                | transcription regulator    |                            |                    | 0.0109             | BMP4,GLI1,GLI2                                                                                                                              |                     |
| TIA1                                               | 0.395          | other                      |                            |                    | 0.0185             | CCNA2,MAP1LC3B,PTGS2                                                                                                                        |                     |
| TYMP                                               |                | growth factor              |                            |                    | 0.049              | CXCL8                                                                                                                                       |                     |

Supplementary Table 4. Upstream regulator analysis based gene set enrichment analysis (GSEA) of differentially expressed genes (DEGs) after ATRA+PDT compared to PDT

| Upstream Regulator          | Expr Log Ratio | Molecule Type                       | Predicted Activation State | Activation z-score | p-value of overlap | Target Molecules in Dataset                                                                                                      | Mechanistic Network |
|-----------------------------|----------------|-------------------------------------|----------------------------|--------------------|--------------------|----------------------------------------------------------------------------------------------------------------------------------|---------------------|
| PTPRE                       |                | phosphatase                         |                            |                    | 0.0285             | CXCL2,CXCL3,TSC22D1                                                                                                              |                     |
| TPSD1                       |                | peptidase                           |                            |                    | 0.0428             | CXCL8,PTGS2                                                                                                                      |                     |
| SLC1A2                      |                | transporter                         |                            |                    | 0.049              | FOS                                                                                                                              |                     |
| RAC2                        |                | enzyme                              |                            |                    | 0.00358            | ANXA1,FHL2,FOS,LDHA,MACF1,RUNX2,TSC22D1,ZYX                                                                                      |                     |
| IAPP                        |                | other                               |                            |                    | 0.00234            | BACE2,FOS,HMGCR,IDI1,MSMO1                                                                                                       | 303 (7)             |
| KIDINS220                   |                | transcription regulator             |                            |                    | 0.0217             | EGR1,FOS                                                                                                                         |                     |
| GPHB5                       |                | other                               |                            |                    | 0.049              | FOS                                                                                                                              |                     |
| anatabine                   |                | chemical - endogenous non-mammalian |                            |                    | 0.0135             | IL1R2,PTGS2                                                                                                                      |                     |
| SCN7A                       |                | ion channel                         |                            |                    | 0.049              | FOS                                                                                                                              |                     |
| RNF7                        |                | enzyme                              |                            |                    | 0.049              | JUN                                                                                                                              |                     |
| AURKAIP1                    |                | enzyme                              |                            |                    | 0.049              | AURKA                                                                                                                            |                     |
| RDX                         |                | other                               |                            |                    | 0.049              | ABCC2                                                                                                                            |                     |
| IGFBP4                      |                | other                               |                            |                    | 0.0316             | IGFBP6,MCAM                                                                                                                      |                     |
| CKS1B                       |                | kinase                              |                            |                    | 0.0428             | CCNA2,CXCL8                                                                                                                      |                     |
| TERC                        |                | other                               |                            |                    | 0.00134            | AURKA,CLU,EGR1,H1-0,HMGCR,NR1D1,TUBB2A                                                                                           |                     |
| CD3E                        |                | transmembrane receptor              |                            |                    | 0.015              | BCL10,CBLB,FAS,FOS,JUN,MYB,PIK3R1,PTGS2                                                                                          |                     |
| PROK1                       |                | growth factor                       |                            |                    | 0.000178           | CXCL8,MCL1,PTGS2,RCAN1                                                                                                           | 447 (24)            |
| FOLR1                       |                | transporter                         |                            |                    | 0.00729            | ACVR1,ARHGDI1,BIRC3,CAV1,MDK,MPP6,PPARG,S100A4,SHCBP1,SORD,ST3GAL4                                                               |                     |
| PPP2R2A                     |                | phosphatase                         |                            |                    | 0.0217             | SAT1,SERPINE2                                                                                                                    |                     |
| NAPB                        |                | transporter                         |                            |                    | 0.049              | CYP1A1                                                                                                                           |                     |
| FANCC                       |                | other                               |                            |                    | 0.000438           | ATP1B1,AXIN2,DKK1,FHL2,GDF15,MMP7,MYOF,PTGS2,RND3,SKAP2,TBC1D9                                                                   | 400 (12)            |
| PIP5K1C                     |                | kinase                              |                            |                    | 0.0428             | ERRF1,PIP5K1A                                                                                                                    |                     |
| N4BP1                       |                | other                               |                            |                    | 0.0109             | HLA-B,JUN,MAP3K14                                                                                                                |                     |
| ANKS1A                      |                | other                               |                            |                    | 0.049              | FOS                                                                                                                              |                     |
| bis(4-hydroxyphenyl)sulfone |                | chemical reagent                    |                            |                    | 0.0316             | CEBPA,PPARG                                                                                                                      |                     |
| 5-methoxytryptophan         |                | chemical - endogenous mammalian     |                            |                    | 0.049              | PTGS2                                                                                                                            |                     |
| venetoclax                  |                | chemical drug                       |                            |                    | 0.049              | MCL1                                                                                                                             |                     |
| 20-hydroxyprostaglandin E2  |                | chemical - endogenous mammalian     |                            |                    | 0.049              | PPARG                                                                                                                            |                     |
| MYCT1                       |                | other                               |                            |                    | 0.0217             | EGLN1,MXD4                                                                                                                       |                     |
| BCL6B                       |                | transcription regulator             |                            |                    | 0.0109             | CASP7,CASP9,S100A4                                                                                                               |                     |
| CCL22                       |                | cytokine                            |                            |                    | 0.0217             | CXCL2,CXCL3                                                                                                                      |                     |
| HNRNP2B1                    |                | other                               |                            |                    | 0.000102           | ARSL,CEMIP,CLDN1,GDF15,GSN,HIPK2,IGFBP2,ITPRID2,MEIS2,MUC13,PGM2L1,PITPNC1,PKIB,ROR1,SEMA3B,SERPINA1,SRI,TGFB2,TRIM31,USH1C,VIL1 |                     |
| AP2A1                       |                | transporter                         |                            |                    | 0.0135             | CEBPA,MT2A                                                                                                                       |                     |
| NKX3-1                      |                | transcription regulator             |                            |                    | 0.00115            | CASP7,ETS1,FOS,PIK3R1,PIM1,SDC4,SOX4,STEAP1,VIL1                                                                                 | 252 (11)            |
| LPAR2                       |                | G-protein coupled receptor          |                            |                    | 0.0428             | CXCL8,PTGS2                                                                                                                      |                     |
| DLST                        |                | enzyme                              |                            |                    | 0.00697            | JUN,PIK3R1                                                                                                                       |                     |
| SND1                        |                | enzyme                              |                            |                    | 0.0000554          | EMP1,EREG,ETV1,PTGS2,QPCT,SLCO4A1,SMURF1,SOX4                                                                                    |                     |
| IGBP1                       |                | phosphatase                         |                            |                    | 0.0109             | CLDN1,IRF1,TJP1                                                                                                                  |                     |
| CD160                       |                | transmembrane receptor              |                            |                    | 0.00789            | FOS,JUN,MCL1                                                                                                                     | 236 (7)             |
| LUC7L3                      |                | other                               |                            |                    | 0.049              | PTGS2                                                                                                                            |                     |
| TOR2A                       |                | other                               |                            |                    | 0.00697            | ACAT1,FOS                                                                                                                        |                     |
| CNOT7                       |                | transcription regulator             |                            |                    | 7.93E-10           | B2M,CEACAM6,CLDN1,HERC6,IFI35,LGALS3BP,OAS3,PARP12,PLSCR1,PSMB8,SP110,TAP2,TFF3                                                  | 200 (7)             |
| CARD14                      |                | other                               |                            |                    | 0.0316             | BCL10,CXCL2                                                                                                                      |                     |
| IFNGR2                      | 0.403          | transmembrane receptor              |                            |                    | 0.00697            | GBP3,IRF1                                                                                                                        | 290 (10)            |
| GFRA2                       |                | transmembrane receptor              |                            |                    | 0.00697            | EGR1,FOSB                                                                                                                        | 165 (7)             |
| HSPB8                       |                | kinase                              |                            |                    | 0.0185             | BMP4,CXCL8,MAP1LC3B                                                                                                              |                     |
| TRIM33                      |                | transcription regulator             |                            |                    | 0.0316             | GATA2,TGFB2                                                                                                                      |                     |
| NMU                         |                | other                               |                            |                    | 0.0319             | FOSB,IL1R2,MYB,ZFP36L1                                                                                                           |                     |
| CITED1                      |                | transcription regulator             |                            |                    | 0.0217             | CYP24A1,IGF2                                                                                                                     |                     |
| OXTR                        |                | G-protein coupled receptor          |                            |                    | 0.0428             | FOS,RUNX2                                                                                                                        |                     |
| GPD1                        | -1.167         | enzyme                              |                            |                    | 0.0167             | ADGRF1,BCL6,CGREF1,CYP2B6,ELOVL6,GADD45A,GPCPD1,RARRES1,SERPINA3,SERPINE2                                                        |                     |
| Cyp2c70                     |                | enzyme                              |                            |                    | 0.0232             | CYP3A5,HMGCR,HNF4A                                                                                                               |                     |
| NFKB1B                      |                | transcription regulator             |                            |                    | 0.00454            | CARD6,CASP7,CASP9,CXCL1,CXCL2,CXCL8,DAPK1,EGR1                                                                                   | 396 (15)            |
| CFH                         |                | other                               |                            |                    | 0.0316             | CXCL2,PPARG                                                                                                                      |                     |
| WBP1                        |                | other                               |                            |                    | 0.049              | MCL1                                                                                                                             |                     |
| ZNF350                      |                | transcription regulator             |                            |                    | 0.00697            | GADD45A,HMGA2                                                                                                                    | 341 (7)             |
| Zfp55                       |                | other                               |                            |                    | 0.049              | PPARG                                                                                                                            |                     |
| BMX                         |                | kinase                              |                            |                    | 0.0285             | CXCL8,FOS,HSPA1A/HSPA1B                                                                                                          |                     |
| ANGPTL3                     |                | growth factor                       |                            |                    | 0.0109             | ACSS2,ELOVL6,HSPG2                                                                                                               |                     |
| COMMD1                      |                | transporter                         |                            |                    | 0.0319             | BIRC3,DDIT4,EGLN1,LDHA                                                                                                           |                     |
| KPNB1                       |                | transporter                         |                            |                    | 0.00697            | BBC3,PMAIP1                                                                                                                      |                     |
| MAP3K10                     |                | kinase                              |                            |                    | 0.00354            | CXCL8,GLI1,GLI2                                                                                                                  |                     |
| SLC27A1                     |                | transporter                         |                            |                    | 0.00697            | CEBPA,PPARG                                                                                                                      |                     |
| HOXB7                       |                | transcription regulator             |                            |                    | 0.00095            | ANGPT1,CXCL1,CXCL8,REN                                                                                                           | 229 (11)            |
| GNB1                        |                | enzyme                              |                            |                    | 0.00259            | CXCL3,DUSP1,F2R,FOSB,IL1R2,JAG2,TSC22D3                                                                                          | 277 (9)             |
| IL4R                        |                | transmembrane receptor              |                            |                    | 0.0478             | ACSL1,ADAM8,FAS,FXD3,PPARG,RUNX2                                                                                                 |                     |
| TFF1                        |                | other                               |                            |                    | 0.049              | PTGS2                                                                                                                            |                     |
| TMSB10/TMSB4X               |                | other                               |                            |                    | 0.00109            | CXCL8,FAS,MMP7                                                                                                                   |                     |
| RAD9A                       |                | enzyme                              |                            |                    | 0.0428             | CDC25A,KLF12                                                                                                                     |                     |
| RGD1560225                  |                | other                               |                            |                    | 0.000452           | EDN1,ITPR2,PTGS2                                                                                                                 |                     |
| IGF2BP3                     |                | translation regulator               |                            |                    | 0.00697            | CD44,IGF2                                                                                                                        | 202 (7)             |
| STK38                       |                | kinase                              |                            |                    | 0.0316             | CXCL2,CXCL3                                                                                                                      |                     |
| DMTF1                       | 0.372          | transcription regulator             |                            |                    | 0.0428             | BBC3,DMTF1                                                                                                                       |                     |
| MLL3                        |                | transcription regulator             |                            |                    | 0.0428             | EDN1,SGK1                                                                                                                        |                     |
| F2RL3                       |                | G-protein coupled receptor          |                            |                    | 0.0316             | EGR1,FOS                                                                                                                         |                     |
| GPS1                        |                | other                               |                            |                    | 0.0316             | AXIN2,FOS                                                                                                                        |                     |
| MECOM                       |                | transcription regulator             |                            |                    | 0.0165             | CEBPA,GATA2,ITPR2,MAP3K14,PML                                                                                                    |                     |
| FABP5                       |                | transporter                         |                            |                    | 0.0478             | CXCL8,IFIT3,PPARG                                                                                                                |                     |
| IL18RAP                     |                | transmembrane receptor              |                            |                    | 0.0428             | CXCL8,PTGS2                                                                                                                      |                     |
| IL2RB                       |                | transmembrane receptor              |                            |                    | 0.0408             | ETS1,FOS,JUN                                                                                                                     |                     |
| BBC3                        | 0.317          | other                               |                            |                    | 0.0217             | BBC3,STMN1                                                                                                                       |                     |
| Pla2g2a                     |                | other                               |                            |                    | 0.049              | PTGS2                                                                                                                            |                     |
| PLA2G2A                     |                | enzyme                              |                            |                    | 0.00354            | CD44,CXCL8,PTGS2                                                                                                                 | 468 (20)            |
| SHOX2                       |                | transcription regulator             |                            |                    | 0.0316             | FGFR2,RUNX2                                                                                                                      |                     |
| SIN3B                       |                | transcription regulator             |                            |                    | 0.0000423          | BCL6,CCNG2,FBXO32,GADD45B,KLF6,LDHA,TXNIP                                                                                        | 338 (7)             |
| SRY                         |                | transcription regulator             |                            |                    | 0.0232             | BBC3,FOSL1,MAOA                                                                                                                  |                     |
| TNKS                        |                | enzyme                              |                            |                    | 0.0428             | AXIN2,MCL1                                                                                                                       |                     |
| VIPR1                       |                | G-protein coupled receptor          |                            |                    | 0.0408             | CXCL2,CXCL3,IRF1                                                                                                                 |                     |
| WAC                         |                | other                               |                            |                    | 0.0316             | PKD4,PPARG                                                                                                                       |                     |
| MED13L                      |                | other                               |                            |                    | 0.0428             | KITLG,LIF                                                                                                                        |                     |
| EPGN                        |                | growth factor                       |                            |                    | 0.049              | FOS                                                                                                                              |                     |
| C5AR2                       |                | G-protein coupled receptor          |                            |                    | 0.0101             | CXCL2,CXCL3,CXCL8,EIF2AK2                                                                                                        |                     |
| IFT20                       |                | other                               |                            |                    | 0.0135             | GLI1,GLI2                                                                                                                        |                     |
| PLAGL2                      |                | transcription regulator             |                            |                    | 0.0135             | IGF2,LDHA                                                                                                                        |                     |
| SP2                         |                | transcription regulator             |                            |                    | 0.00507            | CEACAM1,FOS,MAT2A,SERPINH1                                                                                                       |                     |
| TAX1BP3                     |                | transcription regulator             |                            |                    | 0.049              | FOS                                                                                                                              |                     |
| ADCYAP1R1                   |                | G-protein coupled receptor          |                            |                    | 0.0428             | DUSP5,FOS                                                                                                                        |                     |
| LMNB1                       |                | other                               |                            |                    | 0.00454            | B2M,GPC4,HBEGF,HMGCR,MSMO1,RCN1,SQLE,TGFB2                                                                                       |                     |
| NOXA1                       |                | other                               |                            |                    | 0.049              | NOX1                                                                                                                             |                     |
| CCR4                        |                | G-protein coupled receptor          |                            |                    | 0.0428             | CXCL3,FOS                                                                                                                        |                     |
| PDPN                        |                | other                               |                            |                    | 0.049              | CD44                                                                                                                             |                     |
| CRABP1                      |                | transporter                         |                            |                    | 0.049              | CRABP2                                                                                                                           |                     |

Supplementary Table 4. Upstream regulator analysis based gene set enrichment analysis (GSEA) of differentially expressed genes (DEGs) after ATRA+PDT compared to PDT

| Upstream Regulator                          | Expr Log Ratio | Molecule Type                       | Predicted Activation State | Activation z-score | p-value of overlap | Target Molecules in Dataset                                                                                                                   | Mechanistic Network |
|---------------------------------------------|----------------|-------------------------------------|----------------------------|--------------------|--------------------|-----------------------------------------------------------------------------------------------------------------------------------------------|---------------------|
| FOXH1                                       |                | transcription regulator             |                            |                    | 0.0135             | ALDH1A1,ALDH1A3                                                                                                                               |                     |
| MZF1                                        |                | transcription regulator             |                            |                    | 0.0232             | MYB,PADI1,PRKCA                                                                                                                               |                     |
| glucocalyxin A                              |                | chemical - endogenous non-mammalian |                            |                    | 0.0316             | LCN2,PTGS2                                                                                                                                    |                     |
| HOXB6                                       |                | transcription regulator             |                            |                    | 0.049              | REN                                                                                                                                           |                     |
| YWHA8                                       |                | other                               |                            |                    | 0.0428             | BCAM,DUSP1                                                                                                                                    |                     |
| PPP3CA                                      |                | phosphatase                         |                            |                    | 0.0188             | CPT1A,MAOB,PLD1,PLPP3,PTGS2,RCAN1,RUNX2,S100A4,SDC4                                                                                           |                     |
| PEA15                                       |                | transporter                         |                            |                    | 0.0109             | JUN,PLD1,PLD2                                                                                                                                 |                     |
| UTS2R                                       |                | G-protein coupled receptor          |                            |                    | 0.00789            | ACAT1,PPARG,SCARB1                                                                                                                            |                     |
| RNF17                                       |                | other                               |                            |                    | 0.0316             | EGLN1,SERPINA3                                                                                                                                |                     |
| PON1                                        |                | phosphatase                         |                            |                    | 0.0232             | CD68,PPARG,SCARB1                                                                                                                             |                     |
| THEM4                                       |                | enzyme                              |                            |                    | 0.049              | PTGS2                                                                                                                                         |                     |
| HIVEP3                                      |                | transcription regulator             |                            |                    | 0.0428             | ALG2,S100A4                                                                                                                                   |                     |
| DSPP                                        |                | other                               |                            |                    | 0.0316             | BGN,RUNX2                                                                                                                                     |                     |
| TAPBP                                       | 0.646          | transporter                         |                            |                    | 0.00546            | HLA-B,HLA-E,TAP2                                                                                                                              |                     |
| PELI2                                       | 1.015          | enzyme                              |                            |                    | 0.0217             | CXCL2,CXCL8                                                                                                                                   |                     |
| SDC1                                        |                | enzyme                              |                            |                    | 0.0232             | CXCL2,CXCL3,TGM2                                                                                                                              |                     |
| Tnxa-ps1                                    |                | other                               |                            |                    | 0.049              | DUSP1                                                                                                                                         |                     |
| TFAP2B                                      |                | transcription regulator             |                            |                    | 0.0478             | EDN1,IGF2,MT2A                                                                                                                                |                     |
| ENTPD1                                      |                | enzyme                              |                            |                    | 0.0144             | CXCL2,CXCL3,CXCL8                                                                                                                             |                     |
| RBP1                                        |                | transporter                         |                            |                    | 0.0232             | ALDH1A1,PPARG,STRA6                                                                                                                           |                     |
| BAG3                                        | 0.487          | other                               |                            |                    | 0.0185             | CDKN2B,MAP1LC3B,MCL1                                                                                                                          |                     |
| IRAK2                                       |                | kinase                              |                            |                    | 0.0408             | CXCL2,CXCL8,MAT2A                                                                                                                             |                     |
| CD99                                        |                | other                               |                            |                    | 0.00789            | CAV1,FOSB,JUND                                                                                                                                |                     |
| ARHGDI8                                     | 1.094          | enzyme                              |                            |                    | 0.049              | PTGS2                                                                                                                                         | 394 (7)             |
| PTGER1                                      |                | G-protein coupled receptor          |                            |                    | 0.0232             | CXCL8,FOS,PTGS2                                                                                                                               |                     |
| MAML1                                       |                | transcription regulator             |                            |                    | 0.0408             | CXCL8,EGR1,RND3                                                                                                                               |                     |
| BCL10                                       | 0.695          | transcription regulator             |                            |                    | 0.0408             | CD44,CXCL2,CXCL8                                                                                                                              |                     |
| PEX5L                                       |                | ion channel                         |                            |                    | 0.0232             | HMGCR,IDI1,LSS                                                                                                                                |                     |
| CNR2                                        |                | G-protein coupled receptor          |                            |                    | 0.0363             | CXCL8,EGR1,GRK5,PTGS2                                                                                                                         |                     |
| PBX1                                        |                | transcription regulator             |                            |                    | 0.0239             | AMD1,CDKN2B,ETV1,HOXA3,REN                                                                                                                    |                     |
| M6PR                                        |                | transporter                         |                            |                    | 0.049              | NPC1                                                                                                                                          |                     |
| CX771                                       |                | chemical reagent                    |                            |                    | 0.00546            | CD44,CXCR4,TJP1                                                                                                                               |                     |
| TAF6                                        |                | transcription regulator             |                            |                    | 0.0461             | ATF3,GADD45A,IRF1,JUN                                                                                                                         |                     |
| ROR2                                        |                | kinase                              |                            |                    | 0.000394           | AURKA,AXIN2,CDC25A,CDKN2B,CEBPA,GALM,MAP1LC3B,MYB,PPARG,SLC17A9,TEAD2,TRAF4                                                                   |                     |
| RARRES1                                     | 2.587          | other                               |                            |                    | 0.049              | GRK5                                                                                                                                          |                     |
| XPA                                         | -0.522         | other                               |                            |                    | 0.0316             | FOS,PTGS2                                                                                                                                     |                     |
| 16:0 ceramide-1-phosphate                   |                | chemical - endogenous mammalian     |                            |                    | 0.049              | CXCL8                                                                                                                                         |                     |
| RAB7A                                       |                | enzyme                              |                            |                    | 0.0316             | EGR1,FOS                                                                                                                                      |                     |
| ST14                                        |                | peptidase                           |                            |                    | 0.0285             | CLDN2,CXCL2,CXCL8                                                                                                                             |                     |
| cytarabine/idarubicin                       |                | chemical drug                       |                            |                    | 0.049              | CEBPA                                                                                                                                         |                     |
| RAB5B                                       |                | enzyme                              |                            |                    | 0.049              | FOS                                                                                                                                           |                     |
| PAK1                                        |                | kinase                              |                            |                    | 0.0268             | FBXO32,FOSL1,PFKM,SCARB1,TFPI                                                                                                                 |                     |
| ITIH4                                       |                | other                               |                            |                    | 0.049              | VDR                                                                                                                                           |                     |
| CRY1                                        |                | enzyme                              |                            |                    | 0.0109             | CEBPA,FOS,SGK1                                                                                                                                |                     |
| TOPBP1                                      |                | other                               |                            |                    | 0.0343             | BBC3,CDKN2B,GADD45A                                                                                                                           |                     |
| HDC                                         |                | enzyme                              |                            |                    | 0.0478             | CYP24A1,FOS,PTGS2                                                                                                                             |                     |
| CLEC11A                                     |                | growth factor                       |                            |                    | 0.019              | ANXA1,FHL2,FOS,LDHA,RUNX2,TSC22D1,ZYX                                                                                                         |                     |
| GNPAT                                       | 0.499          | enzyme                              |                            |                    | 0.0135             | UGCG,UGT8                                                                                                                                     |                     |
| CD164                                       |                | other                               |                            |                    | 0.049              | CXCR4                                                                                                                                         |                     |
| cytarabine/filgrastim/fludarabine phosphate |                | biologic drug                       |                            |                    | 0.049              | FOS                                                                                                                                           |                     |
| ETS1-AS1                                    |                | other                               |                            |                    | 0.049              | ETS1                                                                                                                                          |                     |
| TCL1A                                       |                | transcription regulator             |                            |                    | 0.000386           | CD68,CTSE,CTSS,CXCL3,DNMT3A,FOS,GDF15,IL1R2,LCN2,MCL1,SEMA7A,STEAP4,TNFAIP2                                                                   | 447 (17)            |
| HSF2                                        |                | transcription regulator             |                            |                    | 0.0333             | CLU,HSPA1A/HSPA1B,HSPB1,HSPH1,JUN                                                                                                             |                     |
| ERC1                                        |                | other                               |                            |                    | 0.00697            | CXCL8,PTGS2                                                                                                                                   | 317 (9)             |
| CCDC80                                      |                | other                               |                            |                    | 0.00546            | AXIN2,CEBPA,PPARG                                                                                                                             | 361 (12)            |
| ERO1A                                       |                | enzyme                              |                            |                    | 0.0135             | CXCL2,CXCL3                                                                                                                                   |                     |
| NFKBIE                                      |                | transcription regulator             |                            |                    | 0.0109             | CXCL3,CXCL8,LIF                                                                                                                               |                     |
| tofogliflozin                               |                | chemical drug                       |                            |                    | 0.0217             | CPT1A,DGAT2                                                                                                                                   |                     |
| PRC1                                        |                | other                               |                            |                    | 0.049              | PTGS2                                                                                                                                         |                     |
| GREM1                                       |                | other                               |                            |                    | 0.0232             | AXIN2,RUNX2,WNT11                                                                                                                             |                     |
| TF3                                         | -4.091         | other                               |                            |                    | 0.0241             | CD55,CLDN1,FOS,TJP1                                                                                                                           |                     |
| Gm35986                                     |                | other                               |                            |                    | 0.0316             | HMGCR,IDI1                                                                                                                                    |                     |
| farnesyl transferase                        |                | complex                             |                            |                    | 0.00546            | HBEGF,KLF6,MMP7                                                                                                                               | 299 (7)             |
| FLT3                                        |                | kinase                              |                            |                    | 0.0218             | CDC25A,IFIT3,IRF7,MCL1,NOX1,PIM1                                                                                                              |                     |
| ESRRB                                       |                | transcription regulator             |                            |                    | 0.041              | MCL1,NR0B2,PCSK6,PDIA5                                                                                                                        |                     |
| PLAA                                        |                | other                               |                            |                    | 0.0217             | CLU,PTGS2                                                                                                                                     |                     |
| DYSF                                        |                | other                               |                            |                    | 0.0000268          | ANXA1,B2M,CD55,CD68,CTSS,DNAJB1,ERRF1,HSPA1A/HSPA1B,HSPB1,LGALS3,PROS1,S100A4,SERPINA3,TCEAL9                                                 |                     |
| tetramethylpyrazine                         |                | chemical - endogenous non-mammalian |                            |                    | 0.049              | CXCR4                                                                                                                                         |                     |
| MST1R                                       |                | kinase                              |                            |                    | 0.0123             | CXCL3,DVL1,FOS,JUN                                                                                                                            |                     |
| ADCY3                                       |                | enzyme                              |                            |                    | 0.049              | NRP1                                                                                                                                          |                     |
| SERPIND1                                    |                | other                               |                            |                    | 0.0316             | EGR1,F2R                                                                                                                                      |                     |
| IFNLR1                                      |                | transmembrane receptor              |                            |                    | 0.0000623          | ATF3,CXCL2,CXCL3,IFI44,IFIH1,IFIT3,IRF7,LIF,PTGS2,TNFAIP2                                                                                     | 313 (13)            |
| glyceraldehyde-BSA                          |                | chemical reagent                    |                            |                    | 0.0428             | CEBPA,PPARG                                                                                                                                   |                     |
| methylglyoxal-BSA                           |                | chemical reagent                    |                            |                    | 0.0428             | CEBPA,PPARG                                                                                                                                   |                     |
| HESX1                                       |                | transcription regulator             |                            |                    | 0.00354            | AXIN2,GATA2,MYB                                                                                                                               |                     |
| KIT                                         |                | transmembrane receptor              |                            |                    | 0.0015             | CD44,CDKN2B,CXCL3,CXCR4,ETV1,IFIT3,IL15RA,IRF1,KITLG,LGALS3,LIF,MCL1,RAB27B,TJP1                                                              | 522 (20)            |
| GTx-560                                     |                | chemical reagent                    |                            |                    | 0.049              | PROS1                                                                                                                                         |                     |
| EXOSC10                                     |                | kinase                              |                            |                    | 0.049              | FOS                                                                                                                                           |                     |
| EHMT2                                       |                | transcription regulator             |                            |                    | 0.0174             | BCAS3,MAP1LC3B,NCOA3,PKIB,PMAP1,PPL,PTGS2                                                                                                     |                     |
| WNT10B                                      |                | other                               |                            |                    | 0.0144             | CEBPA,PPARG,RUNX2                                                                                                                             |                     |
| CDKL2                                       |                | kinase                              |                            |                    | 0.049              | CD44                                                                                                                                          |                     |
| GNAQ                                        |                | enzyme                              |                            |                    | 8.05E-09           | AK4,ATF3,BMP4,CD44,CSPG4,CXCL3,CXCL8,DUSP5,EDN1,EGR1,F2RL1,FOS,GADD45A,IL1RN,INSIG1,NDRG2,PHLDA1,PLSCR1,PTGS2,RHOB,SGK1,SLCO4A1,TGFB2,ZFP36L1 | 481 (19)            |
| RING1                                       |                | transcription regulator             |                            |                    | 0.00697            | FOS,JUN                                                                                                                                       | 278 (6)             |
| EEF1A1                                      |                | translation regulator               |                            |                    | 0.00697            | CCNA2,S100A4                                                                                                                                  |                     |
| CD300C                                      |                | transmembrane receptor              |                            |                    | 0.0316             | CXCL2,CXCL8                                                                                                                                   |                     |
| CAV2                                        | -0.516         | other                               |                            |                    | 0.049              | CAV1                                                                                                                                          |                     |
| SLC25A13                                    |                | transporter                         |                            |                    | 0.0179             | ADGRF1,BCL6,CGREF1,CYP2B6,ELOVL6,GADD45A,GPCPD1,RARRES1,SERPINA3,SERPINE2                                                                     |                     |
| SRRM1                                       |                | other                               |                            |                    | 0.049              | CD44                                                                                                                                          |                     |
| CHRM2                                       |                | G-protein coupled receptor          |                            |                    | 0.049              | EGR1                                                                                                                                          |                     |
| ACP1                                        |                | phosphatase                         |                            |                    | 0.0135             | EPHA2,FOS                                                                                                                                     |                     |
| NEK2                                        |                | kinase                              |                            |                    | 0.0135             | FAS,GADD45A                                                                                                                                   |                     |
| Mt3                                         |                | other                               |                            |                    | 0.0135             | CEBPD,MT2A                                                                                                                                    |                     |
| BEX2                                        |                | other                               |                            |                    | 0.0185             | BBC3,ITGB6,SWAP70                                                                                                                             |                     |
| H4C3                                        |                | other                               |                            |                    | 0.0428             | FOSB,TGFB2                                                                                                                                    |                     |
| CDC42                                       |                | enzyme                              |                            |                    | 0.0188             | ATF3,FOS,JUN,SCARB1,TGM2                                                                                                                      |                     |
| Cyp2a12/Cyp2a22                             |                | enzyme                              |                            |                    | 0.0135             | CYP3A5,HNF4A                                                                                                                                  |                     |
| Flt1                                        |                | kinase                              |                            |                    | 0.049              | ATF3                                                                                                                                          |                     |
| GNMT                                        |                | enzyme                              |                            |                    | 0.00354            | CYP1A1,NPC1,SCARB1                                                                                                                            | 301 (7)             |
| HSPA1A/HSPA1B                               | 0.551          | enzyme                              |                            |                    | 0.0232             | CXCL2,CXCL8,FOS                                                                                                                               |                     |
| Ifna4                                       |                | other                               |                            |                    | 0.0316             | IRF7,TRIM38                                                                                                                                   |                     |
| Irs4                                        |                | other                               |                            |                    | 0.0024             | EGR1,IRS2                                                                                                                                     | 405 (17)            |
| PPP1R15A                                    | 0.574          | other                               |                            |                    | 0.00295            | CA9,CEBPA,GADD45A,MAP1LC3B,MCL1                                                                                                               |                     |

Supplementary Table 4. Upstream regulator analysis based gene set enrichment analysis (GSEA) of differentially expressed genes (DEGs) after ATRA+PDT compared to PDT

| Upstream Regulator                                          | Expr Log Ratio | Molecule Type                       | Predicted Activation State | Activation z-score | p-value of overlap | Target Molecules in Dataset                                                                                                       | Mechanistic Network |
|-------------------------------------------------------------|----------------|-------------------------------------|----------------------------|--------------------|--------------------|-----------------------------------------------------------------------------------------------------------------------------------|---------------------|
| Cxcl3                                                       |                | cytokine                            |                            |                    | 0.00109            | CEBPA,CEBPD,PPARG                                                                                                                 |                     |
| TCF7                                                        |                | transcription regulator             |                            |                    | 0.00754            | AXIN2,BCL6,CEBPA,CEBPD,FOS,HNF4A,PPARG                                                                                            | 242 (9)             |
| PAXIP1                                                      |                | other                               |                            |                    | 0.0316             | CSPG4,DKK1                                                                                                                        |                     |
| Paxip1                                                      |                | other                               |                            |                    | 0.0021             | ANXA1,CEACAM1,REL                                                                                                                 |                     |
| TWSG1                                                       |                | other                               |                            |                    | 0.0217             | BCL6,ID2                                                                                                                          |                     |
| OBP2B                                                       |                | transporter                         |                            |                    | 0.0316             | CPT1A,PPARG                                                                                                                       |                     |
| HMG2                                                        |                | transcription regulator             |                            |                    | 0.0078             | CXCL1,CXCL2,CXCL8,PHLDA1,RUNX2                                                                                                    | 375 (9)             |
| NKRF                                                        |                | transcription regulator             |                            |                    | 0.0428             | CXCL8,PTGS2                                                                                                                       |                     |
| H1-4                                                        |                | other                               |                            |                    | 0.0217             | GLI1,GLI2                                                                                                                         |                     |
| H1f4                                                        |                | other                               |                            |                    | 0.00109            | AXIN2,GLI1,GLI2                                                                                                                   |                     |
| RFX5                                                        |                | transcription regulator             |                            |                    | 0.0343             | B2M,GCNT2,HLA-B                                                                                                                   |                     |
| S100A7                                                      |                | other                               |                            |                    | 0.0144             | CA9,CXCL1,CXCL8                                                                                                                   |                     |
| PPP2R5B                                                     | 0.609          | phosphatase                         |                            |                    | 0.0217             | SAT1,SERPINE2                                                                                                                     |                     |
| GCLM                                                        |                | enzyme                              |                            |                    | 0.0217             | FOS,JUN                                                                                                                           | 498 (22)            |
| GNRH2                                                       |                | other                               |                            |                    | 0.00789            | FOS,FOSB,JUN                                                                                                                      |                     |
| MPTOE028                                                    |                | chemical drug                       |                            |                    | 0.049              | MCL1                                                                                                                              |                     |
| HDAC8                                                       |                | transcription regulator             |                            |                    | 0.0109             | BBC3,HOXA5,STX1A                                                                                                                  |                     |
| PEX14                                                       |                | transcription regulator             |                            |                    | 0.049              | PTGS2                                                                                                                             |                     |
| DEK                                                         |                | transcription regulator             |                            |                    | 0.00789            | BIRC3,CXCL8,MCL1                                                                                                                  | 309 (7)             |
| ID4                                                         |                | transcription regulator             |                            |                    | 0.00387            | BBC3,CDKN2B,CEBPA,PPARG                                                                                                           | 248 (7)             |
| ZYX                                                         | 0.622          | other                               |                            |                    | 0.0316             | FOS,HIPK2                                                                                                                         |                     |
| GNA15                                                       |                | enzyme                              |                            |                    | 0.00000123         | AKAP12,BMP4,CASP4,CAV2,CEBPD,CXCL2,CXCL3,CXCL8,FHL2,FOSL1,GADD45A,HLA-E,IL1RN,LGALS3,MAT2A,NOX1,PDLM1,PTGS2,RGS2,SERPINA3,ZFP36L1 | 413 (16)            |
| spliceostatin A                                             |                | chemical reagent                    |                            |                    | 0.049              | MCL1                                                                                                                              |                     |
| oligomycin A                                                |                | chemical - endogenous non-mammalian |                            |                    | 0.049              | TXNIP                                                                                                                             |                     |
| Rp-cAMP triethylamine                                       |                | chemical reagent                    |                            |                    | 0.049              | CXCL3                                                                                                                             |                     |
| CML advanced glycation end products                         |                | chemical reagent                    |                            |                    | 0.049              | EGR1                                                                                                                              |                     |
| SR11256                                                     |                | chemical reagent                    |                            |                    | 0.049              | EDN1                                                                                                                              |                     |
| cAMP-dependent protein kinase inhibitor                     |                | chemical drug                       |                            |                    | 0.049              | CYP3A5                                                                                                                            |                     |
| HADHB                                                       |                | enzyme                              |                            |                    | 0.049              | REN                                                                                                                               |                     |
| SOD1                                                        |                | enzyme                              |                            |                    | 0.00563            | ACO1,ASS1,B2M,BAG3,BMP4,CASP4,CKB,CLU,FAS,FGF19,FOS,GUK1,HSPB1,JUN,MAOB,MCL1,PSMB8,PTGS2,PTPN21,RUNX2,SNCG,STMN1,TGFBR2           | 483 (21)            |
| 3,4-(methylenedioxy)cinnamic acid                           |                | chemical reagent                    |                            |                    | 0.049              | MCL1                                                                                                                              |                     |
| CC-122                                                      |                | chemical drug                       |                            |                    | 0.0217             | IFIT3,IRF7                                                                                                                        |                     |
| polyinosine-polycytidylic acid/polyethylenimine formulation |                | chemical reagent                    |                            |                    | 0.0217             | IFIH1,PMAIP1                                                                                                                      |                     |
| COG112 peptide                                              |                | chemical reagent                    |                            |                    | 0.0316             | CXCL2,CXCL3                                                                                                                       |                     |
| STF 083010                                                  |                | chemical reagent                    |                            |                    | 0.049              | NCOA3                                                                                                                             |                     |
| Immunoglobulin Lambda Light Chain                           |                | group                               |                            |                    | 0.0428             | ERN1,PMAIP1                                                                                                                       |                     |
| RB4                                                         |                | chemical reagent                    |                            |                    | 0.049              | MCL1                                                                                                                              |                     |
| ciliobrevin A                                               |                | chemical reagent                    |                            |                    | 0.0024             | GLI1,GLI2                                                                                                                         |                     |
| RB3                                                         |                | chemical reagent                    |                            |                    | 0.049              | MCL1                                                                                                                              |                     |
| HNRNPAB                                                     |                | enzyme                              |                            |                    | 0.0185             | PTGS2,S100A4,TJP1                                                                                                                 |                     |
| J11-CI                                                      |                | chemical reagent                    |                            |                    | 0.0144             | CXCL2,CXCL3,PTGS2                                                                                                                 |                     |
| KMUP-1                                                      |                | chemical reagent                    |                            |                    | 0.0144             | HMGCR,PPARG,SCARB1                                                                                                                |                     |
| CH-223191                                                   |                | chemical reagent                    |                            |                    | 0.0408             | CYP1A1,NT5E,PTGS2                                                                                                                 |                     |
| MLS000389544                                                |                | chemical reagent                    |                            |                    | 0.0024             | PCK2,PK4                                                                                                                          |                     |
| NCGC00184710                                                |                | chemical reagent                    |                            |                    | 0.049              | PK4                                                                                                                               |                     |
| finerenone                                                  |                | chemical drug                       |                            |                    | 0.0217             | LCN2,LGALS3                                                                                                                       |                     |
| arsenic trichloride                                         |                | chemical reagent                    |                            |                    | 0.049              | GADD45A                                                                                                                           |                     |
| SYK023                                                      |                | chemical reagent                    |                            |                    | 0.0135             | CDC25A,CDKN2B                                                                                                                     |                     |
| meayamycin B                                                |                | chemical reagent                    |                            |                    | 0.049              | MCL1                                                                                                                              |                     |
| 1-(2-hydroxy-5-methylphenyl)-3-phenyl-1,3-propanedione      |                | chemical reagent                    |                            |                    | 0.0135             | CEBPD,PPARG                                                                                                                       |                     |
| 24-methylenecycloartanyl ferulate                           |                | chemical reagent                    |                            |                    | 0.049              | PPARG                                                                                                                             |                     |
| BCL201                                                      |                | chemical drug                       |                            |                    | 0.049              | MCL1                                                                                                                              |                     |
| KRT7-AS                                                     |                | other                               |                            |                    | 0.049              | KRT7                                                                                                                              |                     |
| acriflavine                                                 |                | chemical toxicant                   |                            |                    | 0.0144             | CA9,NT5E,PTPRB                                                                                                                    |                     |
| beractant                                                   |                | chemical drug                       |                            |                    | 0.049              | CXCL8                                                                                                                             |                     |
| sulfamethoxazole/trimethoprim                               |                | chemical drug                       |                            |                    | 0.0217             | CXCL8,IRF7                                                                                                                        |                     |
| asbestos                                                    |                | chemical toxicant                   |                            |                    | 0.00789            | CXCL8,FOSL1,JUN                                                                                                                   |                     |
| hydroxyl radical                                            |                | chemical toxicant                   |                            |                    | 0.0024             | CAV1,KLF4                                                                                                                         |                     |
| AP20187                                                     |                | chemical reagent                    |                            |                    | 0.0428             | EGR1,FOS                                                                                                                          |                     |
| furosemide                                                  |                | chemical drug                       |                            |                    | 0.0217             | PTGS2,REN                                                                                                                         |                     |
| enzastaurin                                                 |                | chemical drug                       |                            |                    | 0.0316             | CXCL8,TJP1                                                                                                                        |                     |
| halofuginone                                                |                | chemical drug                       |                            |                    | 0.0000041          | AKAP12,AOC1,BGN,CD44,CD55,CKB,CLIP2,CTSS,EGR1,EMP1,F2R,GY1,HK1,IFITM2,LGALS3BP,PCSK6,PLPP3,SLC39A8,ST3GAL2,STEAP3,TGFBR2,TGM2     |                     |
| NBI 27914                                                   |                | chemical drug                       |                            |                    | 0.049              | FOS                                                                                                                               |                     |
| nicorandil                                                  |                | chemical drug                       |                            |                    | 0.0428             | ATF3,JUN                                                                                                                          |                     |
| diltiazem                                                   |                | chemical drug                       |                            |                    | 0.0109             | EDN1,FOS,JUN                                                                                                                      |                     |
| benzoquinone                                                |                | chemical - endogenous mammalian     |                            |                    | 0.0428             | APOL1,IRF1                                                                                                                        |                     |
| probenecid                                                  |                | chemical drug                       |                            |                    | 0.049              | ABCC1                                                                                                                             |                     |
| thenoyltrifluoroacetone                                     |                | chemical reagent                    |                            |                    | 0.0428             | BIRC3,CXCL8                                                                                                                       |                     |
| carboxyamido-triazole                                       |                | chemical drug                       |                            |                    | 0.0135             | BAG3,FOS                                                                                                                          |                     |
| LY379196                                                    |                | chemical - kinase inhibitor         |                            |                    | 0.0217             | CD55,EGR1                                                                                                                         |                     |
| cantharidin                                                 |                | chemical drug                       |                            |                    | 0.0232             | BAG3,MCL1,SERPINH1                                                                                                                |                     |
| SB202474                                                    |                | chemical - kinase inhibitor         |                            |                    | 0.049              | CYP1A1                                                                                                                            |                     |
| EGTA acetoxymethyl ester                                    |                | chemical reagent                    |                            |                    | 0.0316             | CXCL8,PTGS2                                                                                                                       |                     |
| 2-aminoethoxydiphenylborane                                 |                | chemical reagent                    |                            |                    | 0.0144             | CYP1A1,ITPR2,PTGS2                                                                                                                |                     |
| S-methylisothiopseudouronium                                |                | chemical reagent                    |                            |                    | 0.049              | PTGS2                                                                                                                             |                     |
| phenylacetate                                               |                | chemical - endogenous mammalian     |                            |                    | 0.0135             | CAV1,CAV2                                                                                                                         |                     |
| itraconazole                                                |                | chemical drug                       |                            |                    | 0.00546            | AGR2,CYP1A1,GLI1                                                                                                                  |                     |
| ifosfamide                                                  |                | chemical drug                       |                            |                    | 0.0316             | CYP2B6,SLC22A5                                                                                                                    |                     |
| N-(3-oxododecanoyl)-homoserine lactone                      |                | chemical reagent                    |                            |                    | 0.0285             | CXCL2,CXCL8,PTGS2                                                                                                                 |                     |
| dichlorodiphenyl dichloroethylene                           |                | chemical toxicant                   |                            |                    | 0.00697            | CYP2B6,CYP3A5                                                                                                                     |                     |
| trabectedin                                                 |                | chemical drug                       |                            |                    | 0.00295            | CCNG2,GADD45A,H1-10,LGMN,PPARG,SAT1                                                                                               | 441 (12)            |
| guanfacine                                                  |                | chemical drug                       |                            |                    | 0.049              | FOS                                                                                                                               |                     |
| phenylpropanoic acid                                        |                | chemical - endogenous mammalian     |                            |                    | 0.049              | ATP2A3                                                                                                                            |                     |
| amantadine                                                  |                | chemical drug                       |                            |                    | 0.00697            | DDC,FOS                                                                                                                           |                     |
| capsazepine                                                 |                | chemical toxicant                   |                            |                    | 0.00789            | CXCL8,FOS,PTGS2                                                                                                                   |                     |
| AR-A014418                                                  |                | chemical reagent                    |                            |                    | 0.0428             | CD44,GDF15                                                                                                                        | 430 (21)            |
| raltitrexed                                                 |                | chemical drug                       |                            |                    | 0.00789            | FAS,FXD3,SAT1                                                                                                                     |                     |
| atipamezole                                                 |                | chemical drug                       |                            |                    | 0.0135             | EGR1,FOS                                                                                                                          |                     |
| antimony potassium tartrate                                 |                | chemical toxicant                   |                            |                    | 0.049              | ABCC2                                                                                                                             |                     |
| coomassie brilliant blue                                    |                | chemical drug                       |                            |                    | 0.0285             | LIF,PTGS2,TJP1                                                                                                                    |                     |
| XCT790                                                      |                | chemical reagent                    |                            |                    | 0.0316             | MAOB,PK4                                                                                                                          |                     |
| pyridoxine                                                  |                | chemical - endogenous mammalian     |                            |                    | 0.0343             | DKK1,JUN,PTGS2                                                                                                                    |                     |
| bisphenol A diglycidyl ether                                |                | chemical reagent                    |                            |                    | 0.0185             | EGLN1,TGFBR2,VDR                                                                                                                  |                     |
| alpha-ketoisocaproic acid                                   |                | chemical - endogenous mammalian     |                            |                    | 0.0316             | ATP2B1,ITPR2                                                                                                                      |                     |
| clioquinol                                                  |                | chemical drug                       |                            |                    | 0.0144             | FOS,JUN,KDM6B                                                                                                                     |                     |
| nimesulide                                                  |                | chemical drug                       |                            |                    | 0.0478             | CYP1A1,EREG,PTGS2                                                                                                                 |                     |
| cimetidine                                                  |                | chemical drug                       |                            |                    | 0.0217             | FAS,GDF15                                                                                                                         |                     |
| SR 144528                                                   |                | chemical reagent                    |                            |                    | 0.0185             | CXCL8,EGR1,IL1RN                                                                                                                  |                     |
| bupivacaine                                                 |                | chemical drug                       |                            |                    | 0.0109             | CASP9,FOSL1,JUND                                                                                                                  |                     |
| 4-coumaric acid                                             |                | chemical - endogenous mammalian     |                            |                    | 0.0428             | CCNA2,PTGS2                                                                                                                       |                     |
| ferric nitrilotriacetate                                    |                | chemical toxicant                   |                            |                    | 0.0316             | KLF4,PTGS2                                                                                                                        |                     |
| 2,5-dihydroxymethylcinnamate                                |                | chemical - kinase inhibitor         |                            |                    | 0.049              | EDN1                                                                                                                              |                     |



Supplementary Table 4. Upstream regulator analysis based gene set enrichment analysis (GSEA) of differentially expressed genes (DEGs) after ATRA+PDT compared to PDT

| Upstream Regulator                                   | Expr Log Ratio | Molecule Type                       | Predicted Activation State | Activation z-score | p-value of overlap | Target Molecules in Dataset                                                                                                                       | Mechanistic Network |
|------------------------------------------------------|----------------|-------------------------------------|----------------------------|--------------------|--------------------|---------------------------------------------------------------------------------------------------------------------------------------------------|---------------------|
| LY311727                                             |                | chemical reagent                    |                            |                    | 0.049              | PTGS2                                                                                                                                             |                     |
| BN 50730                                             |                | chemical reagent                    |                            |                    | 0.049              | PTGS2                                                                                                                                             |                     |
| saccharin                                            |                | chemical reagent                    |                            |                    | 0.00697            | CEBPA,PPARG                                                                                                                                       | 344 (7)             |
| sterigmatocystin                                     |                | chemical toxicant                   |                            |                    | 0.049              | CYP1A1                                                                                                                                            |                     |
| hoechst 33342                                        |                | chemical reagent                    |                            |                    | 0.0135             | EPC1,FOS                                                                                                                                          |                     |
| emricasan                                            |                | chemical drug                       |                            |                    | 0.0316             | CXCL2,CXCL3                                                                                                                                       |                     |
| tecacet                                              |                | chemical reagent                    |                            |                    | 0.049              | EDN1                                                                                                                                              |                     |
| BW-755C                                              |                | chemical drug                       |                            |                    | 0.049              | JUND                                                                                                                                              |                     |
| ondansetron                                          |                | chemical drug                       |                            |                    | 0.049              | FOS                                                                                                                                               |                     |
| phenidone                                            |                | chemical drug                       |                            |                    | 0.049              | REN                                                                                                                                               |                     |
| cyclothiazide                                        |                | chemical drug                       |                            |                    | 0.049              | EGR1                                                                                                                                              |                     |
| flurothyl                                            |                | chemical drug                       |                            |                    | 0.049              | FOS                                                                                                                                               |                     |
| carbonyl cyanide p-(trifluoromethoxy)phenylhydrazone |                | chemical reagent                    |                            |                    | 0.0285             | CHAC1,PCK2,PSPH                                                                                                                                   |                     |
| pustulan                                             |                | chemical reagent                    |                            |                    | 0.049              | CXCL8                                                                                                                                             |                     |
| trichloroacetic acid                                 |                | chemical drug                       |                            |                    | 0.049              | MCL1                                                                                                                                              |                     |
| L 733060                                             |                | chemical reagent                    |                            |                    | 0.049              | FOS                                                                                                                                               |                     |
| lansoprazole                                         |                | chemical drug                       |                            |                    | 0.0135             | CXCL8,PTGS2                                                                                                                                       |                     |
| 1-(1-glycerododeca-1,3,5,7,9-pentaene                |                | chemical toxicant                   |                            |                    | 0.049              | PTGS2                                                                                                                                             |                     |
| volinaserin                                          |                | chemical drug                       |                            |                    | 0.00354            | EGR1,FOS,REN                                                                                                                                      | 231 (7)             |
| phenyl-N-tert-butylnitrene                           |                | chemical reagent                    |                            |                    | 0.0478             | CXCL8,HSPA1A/HSPA1B,PTGS2                                                                                                                         |                     |
| warfarin                                             |                | chemical drug                       |                            |                    | 0.0428             | PROCR,PROS1                                                                                                                                       |                     |
| n-nitrosomethylbenzylamine                           |                | chemical toxicant                   |                            |                    | 0.0172             | ADAMTS6,AKR1B10,AMBP,CD44,CLDN1,DUSP5,KRT20,MCL1,PIP5K1A,PLK3,PTGS2,SCEL,SLC30A1                                                                  |                     |
| L-threo-safingol                                     |                | chemical drug                       |                            |                    | 0.049              | CXCL8                                                                                                                                             |                     |
| CHS-828                                              |                | chemical drug                       |                            |                    | 0.00546            | ALDH1A1,CD44,LRIG1                                                                                                                                |                     |
| selfotel                                             |                | chemical drug                       |                            |                    | 0.049              | FOS                                                                                                                                               |                     |
| liarozole                                            |                | chemical drug                       |                            |                    | 0.0135             | PI3,VDR                                                                                                                                           |                     |
| alpha-methylhydrocinnamic acid                       |                | chemical - endogenous mammalian     |                            |                    | 0.0135             | MCL1,MYB                                                                                                                                          |                     |
| tetrabenzazine                                       |                | chemical drug                       |                            |                    | 0.049              | PPP1R1B                                                                                                                                           |                     |
| manumycin A                                          |                | chemical reagent                    |                            |                    | 0.0144             | CXCL8,PLD1,PTGS2                                                                                                                                  |                     |
| ibotenic acid                                        |                | chemical toxicant                   |                            |                    | 0.0135             | FOS,JUN                                                                                                                                           |                     |
| methylselenic acid                                   |                | chemical reagent                    |                            |                    | 8.19E-09           | '4,CASP9,CCNA2,CD44,CDC14B,CDC25A,CLU,DNAJB9,DNAJC3,ELF3,GADD45A,GATA2,GDF15,H1-0,ID2,IRF1,JUN,KLF4,KRT20,MCL1,MXD1,NEDD4L,NMI,PATZ1,PRKCA,RHOB,F | 566 (22)            |
| butylated hydroxytoluene                             |                | chemical toxicant                   |                            |                    | 0.00109            | FOS,JUN,PTGS2                                                                                                                                     | 326 (13)            |
| (R)-5-(2-azetidylmethoxy)-2-chloropyridine           |                | chemical drug                       |                            |                    | 0.049              | FOS                                                                                                                                               |                     |
| 6-cyano-7-nitroquinoxaline-2,3-dione                 |                | chemical reagent                    |                            |                    | 0.0021             | EGR1,FOS,JUN                                                                                                                                      | 186 (7)             |
| ethacrynic acid                                      |                | chemical drug                       |                            |                    | 0.0217             | AKR1C1/AKR1C2,MCL1                                                                                                                                |                     |
| RW J 67657                                           |                | chemical - kinase inhibitor         |                            |                    | 0.0428             | CXCL8,PTGS2                                                                                                                                       |                     |
| rofecoxib                                            |                | chemical drug                       |                            |                    | 0.0478             | PTGS2,REN,TBC1D9                                                                                                                                  |                     |
| dibenzoylmethane                                     |                | chemical toxicant                   |                            |                    | 0.0316             | CYP1A1,PTGS2                                                                                                                                      |                     |
| zimeclidine                                          |                | chemical drug                       |                            |                    | 0.0428             | DEPP1,SERPINA3                                                                                                                                    |                     |
| D609                                                 |                | chemical reagent                    |                            |                    | 0.0478             | CXCL8,JUN,PTGS2                                                                                                                                   |                     |
| bergamottin                                          |                | chemical - endogenous non-mammalian |                            |                    | 0.0428             | CYP1A1,CYP2B6                                                                                                                                     |                     |
| clomipramine                                         |                | chemical drug                       |                            |                    | 0.0109             | DEPP1,LSS,SERPINA3                                                                                                                                |                     |
| barbiturate                                          |                | chemical drug                       |                            |                    | 0.0135             | CYP2B6,CYP3A5                                                                                                                                     |                     |
| BTG3-AS1                                             |                | other                               |                            |                    | 0.049              | ATF3                                                                                                                                              |                     |
| clofarabine                                          |                | chemical drug                       |                            |                    | 0.049              | CDC25A                                                                                                                                            |                     |
| histone deacetylase                                  |                | complex                             |                            |                    | 0.0446             | CCN1,CXCR4,CYP24A1,ID2,NDRG2                                                                                                                      |                     |
| Hif                                                  |                | complex                             |                            |                    | 0.0408             | CKB,CXCL8,LDHA                                                                                                                                    |                     |
| D-sphingosine                                        |                | chemical - endogenous mammalian     |                            |                    | 0.0185             | CLDN1,CXCL2,PTGS2                                                                                                                                 |                     |
| phytosphingosine                                     |                | chemical - endogenous mammalian     |                            |                    | 0.049              | CLDN1                                                                                                                                             |                     |
| apomine                                              |                | chemical drug                       |                            |                    | 0.00697            | HMGCR,NR0B2                                                                                                                                       |                     |
| PK11007                                              |                | chemical reagent                    |                            |                    | 0.0316             | BBC3,PMAIP1                                                                                                                                       |                     |
| aspergillus beta-glucan                              |                | chemical - endogenous non-mammalian |                            |                    | 0.049              | CXCL8                                                                                                                                             |                     |
| pneumocystis beta-glucan                             |                | chemical - endogenous non-mammalian |                            |                    | 0.049              | CXCL8                                                                                                                                             |                     |
| cortistatin A                                        |                | chemical reagent                    |                            |                    | 0.0109             | CEBPA,ETV6,IRF1                                                                                                                                   |                     |
| sevelamer                                            |                | chemical drug                       |                            |                    | 0.0316             | FGF19,NR0B2                                                                                                                                       |                     |
| diazepam                                             |                | chemical drug                       |                            |                    | 0.0428             | CXCL8,FOS                                                                                                                                         |                     |
| flunitrazepam                                        |                | chemical drug                       |                            |                    | 0.049              | CXCL8                                                                                                                                             |                     |
| oxazepam                                             |                | chemical drug                       |                            |                    | 0.0024             | GADD45B,TSC22D1                                                                                                                                   |                     |
| thiabendazole                                        |                | chemical drug                       |                            |                    | 0.049              | CYP1A1                                                                                                                                            |                     |
| methylnitrosourea                                    |                | chemical toxicant                   |                            |                    | 0.00134            | ATP1B3,AURKA,CLU,CXCL3,EGR1,JUN,PSME1                                                                                                             | 467 (18)            |
| arachidonyl-2-chloroethylamide                       |                | chemical reagent                    |                            |                    | 0.049              | EGR1                                                                                                                                              |                     |
| glyburide                                            |                | chemical drug                       |                            |                    | 0.0478             | FOS,PPARG,SCARB1                                                                                                                                  |                     |
| naphthalene-1-2-dione                                |                | chemical toxicant                   |                            |                    | 0.049              | CYP1A1                                                                                                                                            |                     |
| trans-7,8-dihydroxy-7,8-dihydrobenzo(a)pyrene        |                | chemical toxicant                   |                            |                    | 0.049              | CYP1A1                                                                                                                                            |                     |
| anthracene                                           |                | chemical toxicant                   |                            |                    | 0.049              | CXCL8                                                                                                                                             |                     |
| tolrestat                                            |                | chemical drug                       |                            |                    | 0.049              | CXCL8                                                                                                                                             |                     |
| MUC2                                                 |                | other                               |                            |                    | 0.049              | CXCL8                                                                                                                                             |                     |
| dieldrin                                             |                | chemical toxicant                   |                            |                    | 0.0316             | CYP2B6,CYP3A5                                                                                                                                     |                     |
| DDT                                                  |                | chemical toxicant                   |                            |                    | 0.0428             | CYP2B6,CYP3A5                                                                                                                                     |                     |
| naftifine                                            |                | chemical drug                       |                            |                    | 0.049              | SOLE                                                                                                                                              |                     |
| 2-amino-3-methylimidazo(4,5-f)quinoline              |                | chemical toxicant                   |                            |                    | 0.049              | CYP1A1                                                                                                                                            |                     |
| benzo(a)pyrene-7,8-dione                             |                | chemical toxicant                   |                            |                    | 0.0024             | AKR1C1/AKR1C2,CYP1A1                                                                                                                              |                     |
| Ro 31-7549                                           |                | chemical - kinase inhibitor         |                            |                    | 0.049              | PTGS2                                                                                                                                             |                     |
| ketorolac                                            |                | chemical drug                       |                            |                    | 0.00789            | CXCL8,PTGS2,REN                                                                                                                                   | 411 (20)            |
| ethyl linoleate                                      |                | chemical - endogenous mammalian     |                            |                    | 0.0135             | PTGS2,SC5D                                                                                                                                        |                     |
| Ki16425                                              |                | chemical reagent                    |                            |                    | 0.0428             | PLPP3,PTGS2                                                                                                                                       |                     |
| ONO-8711                                             |                | chemical drug                       |                            |                    | 0.049              | FOS                                                                                                                                               |                     |
| nitrendipine                                         |                | chemical drug                       |                            |                    | 0.000452           | CYP2B6,CYP3A5,HMGCR                                                                                                                               |                     |
| acetic acid                                          |                | chemical - endogenous mammalian     |                            |                    | 0.0109             | EGR1,FOS,JUN                                                                                                                                      |                     |
| isobutyric acid                                      |                | chemical - endogenous non-mammalian |                            |                    | 0.049              | ATP2A3                                                                                                                                            |                     |
| catechol                                             |                | chemical - endogenous mammalian     |                            |                    | 0.0316             | FOS,JUN                                                                                                                                           |                     |
| mesalamine                                           |                | chemical drug                       |                            |                    | 0.0109             | HPGD,PPARG,PTGS2                                                                                                                                  |                     |
| eugenol                                              |                | chemical - endogenous non-mammalian |                            |                    | 0.0428             | CXCL8,PTGS2                                                                                                                                       |                     |
| theaflavin monogallate B                             |                | chemical - endogenous non-mammalian |                            |                    | 0.049              | PTGS2                                                                                                                                             |                     |
| propyl gallate                                       |                | chemical toxicant                   |                            |                    | 0.0316             | CXCL8,PTGS2                                                                                                                                       |                     |
| epicatechin gallate                                  |                | chemical drug                       |                            |                    | 0.0241             | CXCL8,GDF15,PTGS2,TP53111                                                                                                                         |                     |
| taprostene                                           |                | chemical reagent                    |                            |                    | 0.00697            | DUSP1,TSC22D3                                                                                                                                     |                     |
| AP-1 decoy                                           |                | chemical reagent                    |                            |                    | 0.049              | DUSP1                                                                                                                                             |                     |
| lavendustin A                                        |                | chemical - kinase inhibitor         |                            |                    | 0.0024             | CYP1A1,EDN1                                                                                                                                       |                     |
| vanadyl sulfate                                      |                | chemical reagent                    |                            |                    | 0.0217             | IL1R2,IL1RN                                                                                                                                       |                     |
| potassium iodide                                     |                | chemical drug                       |                            |                    | 0.049              | CXCL8                                                                                                                                             |                     |
| MitoBioCK-6                                          |                | chemical drug                       |                            |                    | 0.00697            | PCK2,PSPH                                                                                                                                         |                     |
| mercuric chloride                                    |                | chemical toxicant                   |                            |                    | 0.0299             | GADD45A,HBEGF,HSPA1A/HSPA1B,HSPB1,JUN                                                                                                             |                     |
| spermine nitric oxide complex                        |                | chemical toxicant                   |                            |                    | 0.0232             | ACO1,CXCL8,S100A10                                                                                                                                |                     |
| chlorophyll a                                        |                | chemical - endogenous non-mammalian |                            |                    | 0.0135             | FAS,PPARG                                                                                                                                         |                     |
| zinc protoporphyrin IX                               |                | chemical - endogenous mammalian     |                            |                    | 0.0343             | ANGPT1,FGFR2,PTGS2                                                                                                                                |                     |
| senexin B                                            |                | chemical drug                       |                            |                    | 0.000117           | CXCL1,CXCL2,CXCL8                                                                                                                                 | 117 (5)             |
| RUNX1-RUNX1T1                                        |                | fusion gene/product                 |                            |                    | 0.000892           | CEBPA,CYP2S1,GRK5,ID2,IFITM3,KCNE3,KLHL24,MT2A,MTSS1,RND3,SH2B3,SORL1,SOX4                                                                        | 315 (11)            |
| NUP98-KDM5A                                          |                | fusion gene/product                 |                            |                    | 0.0343             | CDK6,MCL1,MYB                                                                                                                                     |                     |
| FUS-ERG                                              |                | fusion gene/product                 |                            |                    | 0.049              | PIM1                                                                                                                                              |                     |
| EWSR1-ERG                                            |                | fusion gene/product                 |                            |                    | 0.049              | PIM1                                                                                                                                              |                     |
| NUP98-NSD1                                           |                | fusion gene/product                 |                            |                    | 0.0343             | CDK6,MCL1,MYB                                                                                                                                     |                     |

Supplementary Table 4. Upstream regulator analysis based gene set enrichment analysis (GSEA) of differentially expressed genes (DEGs) after ATRA+PDT compared to PDT

| Upstream Regulator                                                  | Expr Log Ratio | Molecule Type                       | Predicted Activation State | Activation z-score | p-value of overlap | Target Molecules in Dataset    | Mechanistic Network |
|---------------------------------------------------------------------|----------------|-------------------------------------|----------------------------|--------------------|--------------------|--------------------------------|---------------------|
| PML-RARA                                                            |                | fusion gene/product                 |                            |                    | 0.0299             | EGR1,FOS,JUN,PSMB10,PSMB8      |                     |
| retroinverso ERG inhibitory peptide 2                               |                | chemical reagent                    |                            |                    | 0.0428             | ARHGDI8,CXCR4                  |                     |
| retroinverso ERG inhibitory peptide 1                               |                | chemical reagent                    |                            |                    | 0.0428             | ARHGDI8,CXCR4                  |                     |
| miR-124 inhibitor                                                   |                | chemical reagent                    |                            |                    | 0.049              | MCL1                           |                     |
| anti-miR-32 inhibitor                                               |                | chemical reagent                    |                            |                    | 0.049              | KLf4                           |                     |
| WZB117                                                              |                | chemical reagent                    |                            |                    | 0.0135             | CXCL3,PI3                      |                     |
| cathelicidin-WA                                                     |                | chemical - endogenous mammalian     |                            |                    | 0.00109            | MUC2,TFF3,TJP1                 |                     |
| dexamethasone/INS/isobutylmethylxanthine                            |                | chemical reagent                    |                            |                    | 0.049              | CCNA2                          |                     |
| BIM5078                                                             |                | chemical reagent                    |                            |                    | 0.049              | SULT2B1                        |                     |
| pubchem compound 25247557                                           |                | chemical reagent                    |                            |                    | 0.0135             | PK4,PEX11A                     |                     |
| REC2923                                                             |                | chemical reagent                    |                            |                    | 0.00697            | LDHA,SLC16A1                   |                     |
| tazarotene                                                          |                | chemical drug                       |                            |                    | 0.0217             | PLAAT4,RARRES1                 |                     |
| retinaldehyde                                                       |                | chemical - endogenous mammalian     |                            |                    | 0.0428             | CD44,PTGS2                     |                     |
| thioridazine                                                        |                | chemical drug                       |                            |                    | 0.0123             | DEPP1,LSS,MCL1,SERPINA3        |                     |
| CB-PIC                                                              |                | chemical reagent                    |                            |                    | 0.0217             | ABCB10,CASP9                   |                     |
| ethylenediaminetetraacetic acid                                     |                | chemical drug                       |                            |                    | 0.0232             | CXCL8,EGR1,MCAM                |                     |
| spermidine                                                          |                | chemical - endogenous mammalian     |                            |                    | 0.00651            | AMD1,FOS,IGFBP2,SAT1           |                     |
| spermine                                                            |                | chemical - endogenous mammalian     |                            |                    | 0.0285             | IGFBP2,RUNX2,SAT1              |                     |
| meclizine                                                           |                | chemical drug                       |                            |                    | 0.0285             | ABCC2,CYP2B6,CYP3A5            |                     |
| CTOP                                                                |                | chemical reagent                    |                            |                    | 0.049              | FOS                            |                     |
| apamin                                                              |                | chemical toxicant                   |                            |                    | 0.0316             | FOS,JUN                        |                     |
| BMS200261                                                           |                | chemical reagent                    |                            |                    | 0.049              | CD55                           |                     |
| JMF3086                                                             |                | chemical reagent                    |                            |                    | 0.00789            | CXCL2,CXCL3,PTGS2              | 451 (16)            |
| astressin 2B                                                        |                | biologic drug                       |                            |                    | 0.0232             | CXCL2,FOS,HPGD                 |                     |
| Z-IETD-FMK                                                          |                | chemical - protease inhibitor       |                            |                    | 0.0316             | CXCL8,PLD1                     |                     |
| N-t-Boc-Phe-D-Leu-Phe-D-Leu-Phe                                     |                | chemical reagent                    |                            |                    | 0.049              | PTGS2                          |                     |
| N-carbobenzyloxy-leucine-leucine-norvalinal                         |                | chemical - protease inhibitor       |                            |                    | 0.0343             | CXCL8,MCL1,RARG                |                     |
| BQ-788                                                              |                | biologic drug                       |                            |                    | 0.0109             | CXCL2,EDN1,MCAM                |                     |
| myristoylated Protein Kinase C peptide inhibitor                    |                | chemical - kinase inhibitor         |                            |                    | 0.0135             | CD55,PPARG                     |                     |
| NCB-0846                                                            |                | chemical - kinase inhibitor         |                            |                    | 0.049              | JUN                            |                     |
| Ac-DEVD-CHO                                                         |                | chemical reagent                    |                            |                    | 0.049              | FOS                            |                     |
| aclarubicin                                                         |                | chemical drug                       |                            |                    | 0.0217             | MCL1,PTGS2                     |                     |
| idarubicin                                                          |                | chemical drug                       |                            |                    | 0.0123             | BBC3,GADD45A,MCL1,SESN2        |                     |
| ibutamoren                                                          |                | chemical drug                       |                            |                    | 0.049              | FOS                            |                     |
| trandolapril                                                        |                | chemical drug                       |                            |                    | 0.049              | REN                            |                     |
| bisindolylmaleimide II                                              |                | chemical - kinase inhibitor         |                            |                    | 0.0135             | JUN,PPARG                      |                     |
| linalool                                                            |                | chemical - endogenous non-mammalian |                            |                    | 0.0176             | ACSL1,HMGCR,PCK2,SQLE          |                     |
| geranylgeraniol                                                     |                | chemical - endogenous mammalian     |                            |                    | 0.0428             | HMGCR,MCL1                     |                     |
| ETC-642                                                             |                | chemical reagent                    |                            |                    | 0.049              | HMGCR                          |                     |
| 18-alpha-glycyrrhetic acid                                          |                | chemical - endogenous non-mammalian |                            |                    | 0.0316             | PPARG,TJP1                     |                     |
| hyperforin                                                          |                | chemical drug                       |                            |                    | 0.0343             | ABCC2,CYP24A1,CYP2B6           | 329 (7)             |
| myricetin                                                           |                | chemical - endogenous non-mammalian |                            |                    | 0.00651            | CYP1A1,EGLN1,PTGS2,SLC16A1     |                     |
| kaempferol                                                          |                | chemical toxicant                   |                            |                    | 0.0319             | CYP1A1,JUN,PTGS2,RUNX2         |                     |
| cytosine                                                            |                | chemical drug                       |                            |                    | 0.049              | FOSB                           |                     |
| naltindole                                                          |                | chemical drug                       |                            |                    | 0.0285             | IGF2,IGFBP2,UBC                |                     |
| atropine                                                            |                | chemical drug                       |                            |                    | 0.0428             | FOS,PTGS2                      |                     |
| SN-38                                                               |                | chemical drug                       |                            |                    | 0.00655            | BIRC3,CASP9,CLU,FAS,GDF15,MCL1 | 395 (11)            |
| yohimbine                                                           |                | chemical drug                       |                            |                    | 0.0135             | EGR1,FOS                       |                     |
| NHB2005                                                             |                | chemical reagent                    |                            |                    | 0.0316             | CASP9,ERN1                     |                     |
| tetrahydropalmatine                                                 |                | chemical - endogenous non-mammalian |                            |                    | 0.0024             | CXCL8,PTGS2                    |                     |
| noscipine                                                           |                | chemical drug                       |                            |                    | 0.0285             | BIRC3,MCL1,PTGS2               |                     |
| omacetaxine mepesuccinate                                           |                | chemical drug                       |                            |                    | 0.0217             | CASP9,MCL1                     |                     |
| arecoline                                                           |                | chemical drug                       |                            |                    | 0.0207             | F2R,MAOA,S100A4,TJP1           |                     |
| 2-methoxy-5-(2',3',4'-trimethoxyphenyl)-2,4,6-cycloheptatrien-1-one |                | chemical reagent                    |                            |                    | 0.049              | JUN                            |                     |
| harmaline                                                           |                | chemical drug                       |                            |                    | 0.049              | CYP1A1                         |                     |
| D-lysergic acid diethylamide                                        |                | chemical drug                       |                            |                    | 0.0024             | DDC,SGK1                       |                     |
| LY 354740                                                           |                | chemical drug                       |                            |                    | 0.049              | FOS                            |                     |
| droxidopa                                                           |                | chemical drug                       |                            |                    | 0.049              | FOS                            |                     |
| S(-)-carbidopa                                                      |                | chemical drug                       |                            |                    | 0.049              | FOS                            |                     |
| tyrphostin AG 1296                                                  |                | chemical - kinase inhibitor         |                            |                    | 0.0144             | CEACAM6,JUN,PTGS2              |                     |
| phosphatidic acid                                                   |                | chemical - endogenous mammalian     |                            |                    | 0.0428             | IGF2,PTGS2                     |                     |
| isovaleric acid                                                     |                | chemical - endogenous mammalian     |                            |                    | 0.049              | ATP2A3                         |                     |
| oleoylethanolamide                                                  |                | chemical - endogenous mammalian     |                            |                    | 0.00789            | CPT1A,FOS,FOSB                 | 449 (25)            |
| tridecanoic acid                                                    |                | chemical - endogenous mammalian     |                            |                    | 0.0109             | DUSP5,KLF4,MXD1                |                     |
| 10-hydroxydecanoic acid                                             |                | chemical - endogenous non-mammalian |                            |                    | 0.049              | IRF1                           |                     |
| n-6 docosapentaenoic acid                                           |                | chemical - other                    |                            |                    | 0.049              | PTGS2                          |                     |
| fumagillin                                                          |                | chemical - endogenous non-mammalian |                            |                    | 0.049              | CAV1                           |                     |
| long-chain alcohol                                                  |                | chemical - endogenous non-mammalian |                            |                    | 0.049              | PTGS2                          |                     |
| 12-hydroxyeicosatetraenoic acid                                     |                | chemical - endogenous mammalian     |                            |                    | 0.0428             | NOX1,PTGS2                     |                     |
| 3'-adenylic acid                                                    |                | chemical - endogenous mammalian     |                            |                    | 0.049              | TXNIP                          |                     |
| stavudine                                                           |                | chemical drug                       |                            |                    | 0.00697            | CPT1A,PPARG                    |                     |
| gambogic acid                                                       |                | chemical - endogenous non-mammalian |                            |                    | 0.0232             | BIRC3,EGLN1,PTGS2              |                     |
| poractant alfa                                                      |                | chemical drug                       |                            |                    | 0.049              | CXCL8                          |                     |
| tosyllysine chloromethyl ketone                                     |                | chemical - protease inhibitor       |                            |                    | 0.00546            | CYP1A1,IRF1,PTGS2              | 374 (14)            |
| OSU8-1                                                              |                | chemical - protease inhibitor       |                            |                    | 0.049              | HBEGF                          |                     |
| 5-hydroxytryptophan                                                 |                | chemical - endogenous mammalian     |                            |                    | 0.0217             | FOS,PTGS2                      |                     |
| sarcosine                                                           |                | chemical - endogenous mammalian     |                            |                    | 0.049              | FOS                            |                     |
| 2-amino-3-phosphonopropionic acid                                   |                | chemical - endogenous mammalian     |                            |                    | 0.00697            | EGR1,FOS                       | 300 (7)             |
| quisqualic acid                                                     |                | chemical - endogenous non-mammalian |                            |                    | 0.0316             | EGR1,FOS                       |                     |
| pectin                                                              |                | chemical drug                       |                            |                    | 0.0144             | CD68,LGALS3,SMAD3              |                     |
| allose                                                              |                | chemical - endogenous mammalian     |                            |                    | 0.049              | TXNIP                          |                     |
| galactose                                                           |                | chemical - endogenous mammalian     |                            |                    | 0.0343             | GPD1,VDAC1,VDR                 |                     |
| mannose                                                             |                | chemical - endogenous mammalian     |                            |                    | 0.0408             | FOS,GPD1,MCL1                  |                     |
| 3-deoxyglucosone                                                    |                | chemical - endogenous mammalian     |                            |                    | 0.049              | HBEGF                          |                     |
| growth factor                                                       |                | group                               |                            |                    | 0.00387            | CLU,DUSP1,FOS,PTGS2            | 473 (18)            |
| lactulose                                                           |                | chemical - endogenous mammalian     |                            |                    | 0.049              | CXCL8                          |                     |
| allopregnanolone                                                    |                | chemical - endogenous mammalian     |                            |                    | 0.0144             | FOS,LGALS3,PTGS2               |                     |
| estramustine                                                        |                | chemical drug                       |                            |                    | 0.049              | CYP1A1                         |                     |
| steroid hormone                                                     |                | chemical - endogenous mammalian     |                            |                    | 0.0461             | ACSL1,ACSS2,HMGCR,SCARB1       |                     |
| oxysterol                                                           |                | chemical - other                    |                            |                    | 0.0135             | CREBRF,CXCR4                   |                     |
| epiallopregnanolone                                                 |                | chemical - endogenous mammalian     |                            |                    | 0.0478             | CAV1,CXCL8,HMGCR               |                     |
| kb-NB 142-70                                                        |                | chemical - endogenous mammalian     |                            |                    | 0.00697            | LGALS3,PTGS2                   |                     |
| vinpocetine                                                         |                | chemical - kinase inhibitor         |                            |                    | 0.00109            | DNAJB9,DNAJC3,ERN1             |                     |
| pyocyanin                                                           |                | chemical drug                       |                            |                    | 0.0428             | CXCL3,CXCL8                    |                     |
| Fe3+                                                                |                | chemical reagent                    |                            |                    | 0.0135             | CXCL8,NOX1                     |                     |
| Cd2+                                                                |                | chemical - endogenous mammalian     |                            |                    | 0.049              | HMGCR                          |                     |
| Cr6+                                                                |                | chemical toxicant                   |                            |                    | 0.0285             | CXCL3,FOS,PTGS2                |                     |
| V2+                                                                 |                | chemical reagent                    |                            |                    | 0.0217             | MT2A,SLC30A1                   |                     |
| D-alpha-hydroxyglutarate                                            |                | chemical toxicant                   |                            |                    | 0.049              | CXCL8                          |                     |
| CIL56                                                               |                | chemical - endogenous mammalian     |                            |                    | 0.0135             | GLI1,RUNX2                     |                     |
| RO5256390                                                           |                | chemical reagent                    |                            |                    | 0.0135             | ALDH1A1,CDK6                   |                     |
|                                                                     |                | chemical reagent                    |                            |                    | 0.049              | IRS2                           |                     |

Supplementary Table 4. Upstream regulator analysis based gene set enrichment analysis (GSEA) of differentially expressed genes (DEGs) after ATRA+PDT compared to PDT

| Upstream Regulator | Expr Log Ratio | Molecule Type          | Predicted Activation State | Activation z-score | p-value of overlap   | Target Molecules in Dataset                                                                                                                                                                                                                 | Mechanistic Network |
|--------------------|----------------|------------------------|----------------------------|--------------------|----------------------|---------------------------------------------------------------------------------------------------------------------------------------------------------------------------------------------------------------------------------------------|---------------------|
| PC-SPES<br>TCF     |                | chemical drug<br>group |                            |                    | 0.000073<br>4.33E-10 | ANXA1,B2M,CCNA2,CLU,DNAJB1,HLA-B,HLA-C,IMPDH1,IRF1,PPP1R15A,QSOX1,SCARB1,TIA1,TUBA4A,TUBB2A<br>.LDH1A1,ARL4A,BMP4,CD44,CEACAM1,CYP24A1,DPEP1,ECM1,EGR1,FOS,LGALS3,MMP7,PCSK6,PTGS2,QPCT,RCN1,SERPINA1,SERPINA3,SERPINA5,TSC22D1,TSPAN8,UGCG | 448 (18)            |
