# Supplementary material for: All-trans retinoic acid enhances the anti-tumour effects of fimaporfin-based photodynamic therapy
Source: bioRxiv preprint, doi:10.1101/2022.04.28.487643, version 2 (2022-08-08)
Supplement: Supplementary Table 1 [file 487643_file16.pdf]

Table S1: Significant differentially expressed genes (DEGs) after ATRA+PDT compared to PDT.

| #  | gene     | locus                     | sample_1 | sample_2 | value_1  | value_2  | log2(fold_change) | p_value | q_value    |
|----|----------|---------------------------|----------|----------|----------|----------|-------------------|---------|------------|
| 1  | AADAC    | chr3:151347319-151546276  | PDT      | ATRA+PDT | 4.18233  | 2.51685  | -0.732689         | 0.0008  | 0.0114972  |
| 2  | AAK1     | chr2:69685126-69870977    | PDT      | ATRA+PDT | 1.64626  | 2.29391  | 0.478624          | 0.00005 | 0.00102476 |
| 3  | ABCA2    | chr9:139901685-139931234  | PDT      | ATRA+PDT | 12.3197  | 8.26399  | -0.576054         | 0.00005 | 0.00102476 |
| 4  | ABCB10   | chr1:229652328-229694442  | PDT      | ATRA+PDT | 8.39398  | 6.2916   | -0.415928         | 0.00055 | 0.0085238  |
| 5  | ABCC1    | chr16:16043433-16236930   | PDT      | ATRA+PDT | 21.4222  | 26.0988  | 0.284878          | 0.00325 | 0.0342581  |
| 6  | ABCC2    | chr10:101542462-101611662 | PDT      | ATRA+PDT | 1.13309  | 0.335678 | -1.75511          | 0.00005 | 0.00102476 |
| 7  | ABHD6    | chr3:58223258-58280461    | PDT      | ATRA+PDT | 2.07661  | 1.27837  | -0.699919         | 0.0012  | 0.0156263  |
| 8  | ABLM1    | chr10:116190868-116444414 | PDT      | ATRA+PDT | 54.6826  | 41.5563  | -0.396015         | 0.0001  | 0.00194145 |
| 9  | ABP1     | chr7:150549572-150558379  | PDT      | ATRA+PDT | 2.27635  | 1.40021  | -0.701078         | 0.00135 | 0.0171     |
| 10 | ABTB2    | chr11:34172533-34379555   | PDT      | ATRA+PDT | 20.8252  | 27.426   | 0.397214          | 0.0001  | 0.00194145 |
| 11 | ACAA1    | chr3:38080695-38178733    | PDT      | ATRA+PDT | 33.7981  | 27.0265  | -0.32257          | 0.0023  | 0.0255827  |
| 12 | ACAT1    | chr11:107992257-108018891 | PDT      | ATRA+PDT | 25.2783  | 17.6737  | -0.516291         | 0.00005 | 0.00102476 |
| 13 | ACCN2    | chr12:50451486-50477394   | PDT      | ATRA+PDT | 3.70639  | 2.03942  | -0.861857         | 0.00005 | 0.00102476 |
| 14 | ACER2    | chr9:19408924-19452500    | PDT      | ATRA+PDT | 8.75569  | 14.5626  | 0.733978          | 0.00005 | 0.00102476 |
| 15 | ACO1     | chr9:32384600-32450832    | PDT      | ATRA+PDT | 14.6191  | 11.3469  | -0.365548         | 0.0012  | 0.0156263  |
| 16 | ACOT11   | chr1:55013806-55100417    | PDT      | ATRA+PDT | 5.78464  | 4.43867  | -0.382102         | 0.00225 | 0.0252369  |
| 17 | ACSL1    | chr4:185676748-185747215  | PDT      | ATRA+PDT | 8.09953  | 4.95421  | -0.709184         | 0.00005 | 0.00102476 |
| 18 | ACSS2    | chr20:33462765-33515769   | PDT      | ATRA+PDT | 2.4964   | 1.62324  | -0.620967         | 0.0009  | 0.0125788  |
| 19 | ACVR1    | chr2:158592957-158732374  | PDT      | ATRA+PDT | 24.0242  | 29.2492  | 0.283907          | 0.00515 | 0.0488381  |
| 20 | ADAM8    | chr10:135075919-135090407 | PDT      | ATRA+PDT | 2.6359   | 1.80406  | -0.547053         | 0.00115 | 0.0151042  |
| 21 | ADAM9    | chr8:38854504-38962779    | PDT      | ATRA+PDT | 54.3784  | 68.1282  | 0.32522           | 0.00095 | 0.0131061  |
| 22 | ADAMTS6  | chr5:64444562-64777704    | PDT      | ATRA+PDT | 1.65403  | 2.38699  | 0.529205          | 0.00005 | 0.00102476 |
| 23 | AGMAT    | chr1:15853351-15911605    | PDT      | ATRA+PDT | 12.0281  | 8.43434  | -0.51206          | 0.00045 | 0.00719326 |
| 24 | AGR2     | chr7:16832263-16844738    | PDT      | ATRA+PDT | 472.679  | 277.218  | -0.769839         | 0.00005 | 0.00102476 |
| 25 | AGR3     | chr7:16899029-16921613    | PDT      | ATRA+PDT | 21.2253  | 13.6572  | -0.636122         | 0.00005 | 0.00102476 |
| 26 | AIFM3    | chr22:21319417-21335649   | PDT      | ATRA+PDT | 1.47668  | 0.587014 | -1.33089          | 0.00005 | 0.00102476 |
| 27 | AJUBA    | chr14:23440409-23451848   | PDT      | ATRA+PDT | 20.9896  | 25.772   | 0.296128          | 0.00435 | 0.0428104  |
| 28 | AK2      | chr1:33473540-33502512    | PDT      | ATRA+PDT | 74.9825  | 61.4369  | -0.287448         | 0.0044  | 0.0431831  |
| 29 | AK4      | chr1:65613231-65697828    | PDT      | ATRA+PDT | 5.16637  | 2.81494  | -0.876049         | 0.00005 | 0.00102476 |
| 30 | AKAP12   | chr6:151561133-151679694  | PDT      | ATRA+PDT | 5.55638  | 17.5063  | 1.65566           | 0.00005 | 0.00102476 |
| 31 | AKR1B10  | chr7:134212343-134226166  | PDT      | ATRA+PDT | 1046.65  | 831.293  | -0.332352         | 0.0019  | 0.0221245  |
| 32 | AKR1C1   | chr10:5005453-5020158     | PDT      | ATRA+PDT | 50.1133  | 24.6981  | -1.02079          | 0.00005 | 0.00102476 |
| 33 | AKR1C2   | chr10:5029967-5060225     | PDT      | ATRA+PDT | 18.5005  | 10.5262  | -0.813584         | 0.00005 | 0.00102476 |
| 34 | AKR1C3   | chr10:5090957-5149878     | PDT      | ATRA+PDT | 113.964  | 81.5445  | -0.482918         | 0.00005 | 0.00102476 |
| 35 | AKR7A3   | chr1:19609056-19615280    | PDT      | ATRA+PDT | 18.7555  | 34.5418  | 0.881027          | 0.00005 | 0.00102476 |
| 36 | AKR7L    | chr1:19592475-19600568    | PDT      | ATRA+PDT | 2.7002   | 4.73611  | 0.810636          | 0.00005 | 0.00102476 |
| 37 | ALCAM    | chr3:105085556-105295757  | PDT      | ATRA+PDT | 10.8802  | 14.7247  | 0.43654           | 0.00005 | 0.00102476 |
| 38 | ALDH1A1  | chr9:75515577-75568233    | PDT      | ATRA+PDT | 405.218  | 165.602  | -1.29098          | 0.00005 | 0.00102476 |
| 39 | ALDH1A3  | chr15:101420008-101456830 | PDT      | ATRA+PDT | 17.4142  | 37.3478  | 1.10076           | 0.00005 | 0.00102476 |
| 40 | ALDH1B1  | chr9:38392660-38398662    | PDT      | ATRA+PDT | 10.8202  | 7.59703  | -0.510217         | 0.00005 | 0.00102476 |
| 41 | ALDH1L1  | chr3:125822407-125899485  | PDT      | ATRA+PDT | 0.337508 | 1.1976   | 1.82715           | 0.00005 | 0.00102476 |
| 42 | ALDH2    | chr12:112204690-112247789 | PDT      | ATRA+PDT | 32.9702  | 40.9484  | 0.312646          | 0.0022  | 0.024728   |
| 43 | ALDH7A1  | chr5:125877532-125931082  | PDT      | ATRA+PDT | 7.3038   | 9.72537  | 0.413106          | 0.00015 | 0.00281494 |
| 44 | ALG2     | chr9:101978706-101984246  | PDT      | ATRA+PDT | 17.2807  | 13.2892  | -0.378913         | 0.0004  | 0.00650107 |
| 45 | ALPK3    | chr15:85359910-85416713   | PDT      | ATRA+PDT | 14.89    | 19.9106  | 0.419193          | 0.00005 | 0.00102476 |
| 46 | AMBP     | chr9:116822407-116840752  | PDT      | ATRA+PDT | 2.98429  | 1.4942   | -0.998018         | 0.0004  | 0.00650107 |
| 47 | AMBRA1   | chr11:46417963-46612914   | PDT      | ATRA+PDT | 7.53966  | 9.82411  | 0.381827          | 0.0004  | 0.00650107 |
| 48 | AMD1     | chr6:111195986-111216913  | PDT      | ATRA+PDT | 73.7935  | 59.5988  | -0.308209         | 0.0019  | 0.0221245  |
| 49 | AMN1     | chr12:31824070-31882108   | PDT      | ATRA+PDT | 4.18126  | 6.13014  | 0.551983          | 0.00005 | 0.00102476 |
| 50 | AMOTL2   | chr3:134074189-134093406  | PDT      | ATRA+PDT | 7.07425  | 12.6607  | 0.839711          | 0.00005 | 0.00102476 |
| 51 | ANGPT1   | chr8:108261709-108510254  | PDT      | ATRA+PDT | 2.09696  | 2.80515  | 0.419779          | 0.00185 | 0.0217319  |
| 52 | ANKMY1   | chr2:241418838-241497405  | PDT      | ATRA+PDT | 4.63985  | 6.0158   | 0.374679          | 0.0048  | 0.0461751  |
| 53 | ANKRD13B | chr17:27920526-27948441   | PDT      | ATRA+PDT | 6.37219  | 4.92921  | -0.370435         | 0.0041  | 0.040954   |
| 54 | ANKS3    | chr16:4746510-4799397     | PDT      | ATRA+PDT | 2.8895   | 3.81208  | 0.399756          | 0.00505 | 0.0482325  |
| 55 | ANKS4B   | chr16:21245015-21263750   | PDT      | ATRA+PDT | 1.89722  | 0.765152 | -1.31007          | 0.00005 | 0.00102476 |
| 56 | ANKS6    | chr9:101494290-101558794  | PDT      | ATRA+PDT | 7.94934  | 6.24206  | -0.348812         | 0.0015  | 0.0184954  |
| 57 | ANXA1    | chr9:75766780-75785307    | PDT      | ATRA+PDT | 666.622  | 827.567  | 0.312008          | 0.0031  | 0.0328065  |
| 58 | ANXA10   | chr4:169013687-169108893  | PDT      | ATRA+PDT | 116.272  | 212.071  | 0.867047          | 0.00005 | 0.00102476 |
| 59 | ANXA11   | chr10:81914879-81965328   | PDT      | ATRA+PDT | 91.7455  | 111.849  | 0.285847          | 0.004   | 0.0401429  |
| 60 | ANXA13   | chr8:124693033-124749647  | PDT      | ATRA+PDT | 5.31172  | 1.27258  | -2.06142          | 0.00005 | 0.00102476 |
| 61 | APOBEC3B | chr22:39353526-39388783   | PDT      | ATRA+PDT | 4.55594  | 8.63943  | 0.923187          | 0.00005 | 0.00102476 |
| 62 | APOL1    | chr22:36649116-36663577   | PDT      | ATRA+PDT | 4.95905  | 9.82204  | 0.98596           | 0.00005 | 0.00102476 |
| 63 | APOL2    | chr22:36622254-36636000   | PDT      | ATRA+PDT | 4.72196  | 7.00791  | 0.5696            | 0.00005 | 0.00102476 |
| 64 | APOL6    | chr22:36044423-36064456   | PDT      | ATRA+PDT | 2.85787  | 5.44977  | 0.931257          | 0.00005 | 0.00102476 |
| 65 | APRT     | chr16:88875876-88878342   | PDT      | ATRA+PDT | 200.504  | 160.185  | -0.323894         | 0.0011  | 0.0146092  |
| 66 | AQP5     | chr12:50355278-50359461   | PDT      | ATRA+PDT | 12.7712  | 9.55428  | -0.41867          | 0.00085 | 0.0119898  |
| 67 | ARHGAP29 | chr1:94634462-94703307    | PDT      | ATRA+PDT | 73.0217  | 93.0992  | 0.350444          | 0.0007  | 0.0103814  |
| 68 | ARHGDI1  | chr12:15094949-15114562   | PDT      | ATRA+PDT | 20.5853  | 43.954   | 1.09438           | 0.00005 | 0.00102476 |
| 69 | ARHGEF40 | chr14:21538526-21558036   | PDT      | ATRA+PDT | 1.39385  | 0.992707 | -0.489635         | 0.0036  | 0.0371409  |
| 70 | ARID5B   | chr10:63661012-63856707   | PDT      | ATRA+PDT | 1.53658  | 1.16869  | -0.394839         | 0.00465 | 0.0450978  |
| 71 | ARL14    | chr3:160394947-160396235  | PDT      | ATRA+PDT | 32.1274  | 57.9683  | 0.851458          | 0.00005 | 0.00102476 |
| 72 | ARL4A    | chr7:12726451-12730558    | PDT      | ATRA+PDT | 13.1366  | 10.3091  | -0.349671         | 0.00155 | 0.0189586  |
| 73 | ARL6IP4  | chr12:123464879-123467460 | PDT      | ATRA+PDT | 50.1261  | 40.2597  | -0.316227         | 0.0019  | 0.0221245  |
| 74 | ARL8A    | chr1:202102531-202113871  | PDT      | ATRA+PDT | 10.0644  | 14.1927  | 0.495885          | 0.0001  | 0.00194145 |
| 75 | ARRDC3   | chr5:90664540-90716532    | PDT      | ATRA+PDT | 5.84636  | 7.96361  | 0.445885          | 0.00035 | 0.00584867 |
| 76 | ARRDC4   | chr15:98503932-98517068   | PDT      | ATRA+PDT | 9.12536  | 7.30596  | -0.320808         | 0.00475 | 0.045818   |
| 77 | ARSL     | chr4:114821439-114900878  | PDT      | ATRA+PDT | 11.1443  | 8.63381  | -0.368237         | 0.0005  | 0.00788626 |
| 78 | ASB13    | chr10:5680819-5708558     | PDT      | ATRA+PDT | 9.28322  | 6.93377  | -0.420986         | 0.00065 | 0.00978942 |
| 79 | ASMTL    | chrY:1469423-1522655      | PDT      | ATRA+PDT | 11.024   | 7.71413  | -0.515076         | 0.00005 | 0.00102476 |
| 80 | ASS1     | chr9:133320093-133376661  | PDT      | ATRA+PDT | 5.71336  | 2.75499  | -1.05229          | 0.00005 | 0.00102476 |
| 81 | ATAD3B   | chr1:1407163-1431582      | PDT      | ATRA+PDT | 24.6905  | 19.5282  | -0.338397         | 0.00155 | 0.0189586  |
| 82 | ATF3     | chr1:212738675-212794119  | PDT      | ATRA+PDT | 97.0536  | 219.94   | 1.18025           | 0.00005 | 0.00102476 |
| 83 | ATHL1    | chr11:289137-295688       | PDT      | ATRA+PDT | 14.4644  | 24.4115  | 0.755047          | 0.00005 | 0.00102476 |
| 84 | ATP1B1   | chr1:169075946-169337186  | PDT      | ATRA+PDT | 182.748  | 105.694  | -0.789958         | 0.00005 | 0.00102476 |
| 85 | ATP1B3   | chr3:141595469-141645382  | PDT      | ATRA+PDT | 52.6144  | 42.1756  | -0.319049         | 0.00135 | 0.0171     |
| 86 | ATP2A3   | chr17:3827162-3867758     | PDT      | ATRA+PDT | 3.1096   | 2.14415  | -0.536323         | 0.0001  | 0.00194145 |
| 87 | ATP2B1   | chr12:89981825-90049844   | PDT      | ATRA+PDT | 28.9522  | 22.6681  | -0.353007         | 0.0002  | 0.00358322 |
| 88 | ATP5G1   | chr17:46970147-46973232   | PDT      | ATRA+PDT | 188.142  | 138.532  | -0.441608         | 0.00005 | 0.00102476 |
| 89 | ATP5G3   | chr2:176040985-176046490  | PDT      | ATRA+PDT | 57.8546  | 46.8294  | -0.305018         | 0.00235 | 0.0259765  |
| 90 | ATP6V1B1 | chr2:71162997-71192561    | PDT      | ATRA+PDT | 3.24369  | 1.8939   | -0.776278         | 0.0006  | 0.00910057 |
| 91 | ATP9A    | chr20:50213313-50384908   | PDT      | ATRA+PDT | 27.2854  | 43.0077  | 0.656466          | 0.00005 | 0.00102476 |
| 92 | ATXN2    | chr12:111890017-112037480 | PDT      | ATRA+PDT | 11.3362  | 14.1905  | 0.323992          | 0.002   | 0.0229388  |
| 93 | AURKA    | chr20:54944444-54967351   | PDT      | ATRA+PDT | 72.5295  | 58.7749  | -0.303368         | 0.0017  | 0.0202822  |
| 94 | AXIN2    | chr17:63524682-63557740   | PDT      | ATRA+PDT | 14.4559  | 4.59396  | -1.65385          | 0.00005 | 0.00102476 |
| 95 | AZGP1    | chr7:99564349-99573735    | PDT      | ATRA+PDT | 9.89214  | 6.2095   | -0.671806         | 0.00005 | 0.00102476 |
| 96 | B2M      | chr15:45003684-45010357   | PDT      | ATRA+PDT | 459.14   | 652.756  | 0.507611          | 0.00005 | 0.00102476 |
| 97 | B3GNT5   | chr3:182895830-183145855  | PDT      | ATRA+PDT | 26.8585  | 37.6283  | 0.486439          | 0.00005 | 0.00102476 |
| 98 | B7H6     | chr11:17373308-17398868   | PDT      | ATRA+PDT | 9.70913  | 6.97765  | -0.4766           | 0.00005 | 0.00102476 |
| 99 | BACE2    | chr21:42539727-42648524   | PDT      |          |          |          |                   |         |            |

Table S1: Significant differentially expressed genes (DEGs) after ATRA+PDT compared to PDT.

| #   | gene      | locus                     | sample_1 | sample_2 | value_1  | value_2  | log2(fold_change) | p_value | q_value    |
|-----|-----------|---------------------------|----------|----------|----------|----------|-------------------|---------|------------|
| 103 | BAZ2B     | chr2:160175489-160473059  | PDT      | ATRA+PDT | 7.00159  | 9.66999  | 0.465831          | 0.00005 | 0.00102476 |
| 104 | BBC3      | chr19:47724078-47736023   | PDT      | ATRA+PDT | 40.8982  | 50.9416  | 0.316808          | 0.0023  | 0.0255827  |
| 105 | BBS4      | chr15:72978519-73030817   | PDT      | ATRA+PDT | 6.72558  | 8.77988  | 0.384542          | 0.00195 | 0.0225592  |
| 106 | BCAM      | chr19:45312337-45324678   | PDT      | ATRA+PDT | 36.6104  | 49.3033  | 0.429432          | 0.00005 | 0.00102476 |
| 107 | BCAS1     | chr20:52560078-52687304   | PDT      | ATRA+PDT | 17.0823  | 27.5657  | 0.690368          | 0.00005 | 0.00102476 |
| 108 | BCAS3     | chr17:58755171-59470199   | PDT      | ATRA+PDT | 1.34242  | 2.28822  | 0.769385          | 0.00005 | 0.00102476 |
| 109 | BCDIN3D   | chr12:50222325-50236912   | PDT      | ATRA+PDT | 1.17038  | 1.78497  | 0.608924          | 0.00245 | 0.0267496  |
| 110 | BCL10     | chr1:85731459-85743771    | PDT      | ATRA+PDT | 21.8727  | 35.4025  | 0.694719          | 0.00005 | 0.00102476 |
| 111 | BCL3      | chr19:45251977-45263301   | PDT      | ATRA+PDT | 10.2934  | 17.5884  | 0.77291           | 0.00005 | 0.00102476 |
| 112 | BCL6      | chr3:187416046-187463513  | PDT      | ATRA+PDT | 6.68803  | 8.88905  | 0.410447          | 0.0007  | 0.0103814  |
| 113 | BGN       | chrX:152760346-152775004  | PDT      | ATRA+PDT | 16.5827  | 6.73104  | -1.30078          | 0.00005 | 0.00102476 |
| 114 | BIRC3     | chr11:102188180-102210135 | PDT      | ATRA+PDT | 1.25282  | 2.58     | 1.04219           | 0.00005 | 0.00102476 |
| 115 | BMP4      | chr14:54416454-54423554   | PDT      | ATRA+PDT | 124.779  | 91.4887  | -0.447709         | 0.00005 | 0.00102476 |
| 116 | BOLA3     | chr2:74362527-74375039    | PDT      | ATRA+PDT | 48.6335  | 37.0183  | -0.393712         | 0.00285 | 0.0305545  |
| 117 | BRPF3     | chr6:36164549-36200567    | PDT      | ATRA+PDT | 19.2699  | 24.3925  | 0.340091          | 0.00075 | 0.0109256  |
| 118 | BTBD10    | chr11:13409555-13484838   | PDT      | ATRA+PDT | 29.8294  | 39.4629  | 0.403762          | 0.00005 | 0.00102476 |
| 119 | BTG1      | chr12:92378751-92539673   | PDT      | ATRA+PDT | 22.097   | 27.4426  | 0.312566          | 0.00175 | 0.0207397  |
| 120 | BTN2A1    | chr6:26458152-26482737    | PDT      | ATRA+PDT | 11.2454  | 14.5205  | 0.368763          | 0.00115 | 0.0151042  |
| 121 | BTN3A1    | chr6:26402464-26415444    | PDT      | ATRA+PDT | 0.773794 | 1.7837   | 1.20485           | 0.00005 | 0.00102476 |
| 122 | BTN3A2    | chr6:26365397-26378548    | PDT      | ATRA+PDT | 1.8277   | 2.68976  | 0.557449          | 0.00045 | 0.00719326 |
| 123 | BTNL9     | chr5:180467224-180488523  | PDT      | ATRA+PDT | 6.38227  | 4.6704   | -0.450523         | 0.0004  | 0.00650107 |
| 124 | C10orf10  | chr10:45455218-45490172   | PDT      | ATRA+PDT | 3.78595  | 9.13062  | 1.27006           | 0.00005 | 0.00102476 |
| 125 | C10orf125 | chr10:135168657-135171529 | PDT      | ATRA+PDT | 15.3108  | 9.96173  | -0.620081         | 0.001   | 0.0135165  |
| 126 | C10orf47  | chr10:11865396-11936709   | PDT      | ATRA+PDT | 13.1369  | 20.2372  | 0.623382          | 0.00005 | 0.00102476 |
| 127 | C10orf54  | chr10:73156690-73575704   | PDT      | ATRA+PDT | 1.13266  | 2.95064  | 1.38132           | 0.00005 | 0.00102476 |
| 128 | C11orf68  | chr11:65684282-65686531   | PDT      | ATRA+PDT | 15.6446  | 20.922   | 0.419358          | 0.0005  | 0.00788626 |
| 129 | C11orf75  | chr11:93211638-93276546   | PDT      | ATRA+PDT | 10.0852  | 7.34606  | -0.457202         | 0.0041  | 0.040954   |
| 130 | C12orf35  | chr12:32112352-32146043   | PDT      | ATRA+PDT | 24.3656  | 43.641   | 0.840838          | 0.00005 | 0.00102476 |
| 131 | C12orf36  | chr12:13523604-13529679   | PDT      | ATRA+PDT | 1.77168  | 1.09353  | -0.696119         | 0.00075 | 0.0109256  |
| 132 | C14orf43  | chr14:74181824-74253896   | PDT      | ATRA+PDT | 3.43389  | 4.65663  | 0.439443          | 0.0001  | 0.00194145 |
| 133 | C15orf52  | chr15:40623652-40633168   | PDT      | ATRA+PDT | 7.17081  | 4.87871  | -0.555636         | 0.00005 | 0.00102476 |
| 134 | C16orf52  | chr16:22019455-22095972   | PDT      | ATRA+PDT | 6.24092  | 8.43014  | 0.433798          | 0.0001  | 0.00194145 |
| 135 | C17orf28  | chr17:72946838-72968900   | PDT      | ATRA+PDT | 6.1793   | 4.19248  | -0.559639         | 0.00005 | 0.00102476 |
| 136 | C19orf66  | chr19:10196805-10213425   | PDT      | ATRA+PDT | 1.11955  | 2.17595  | 0.958731          | 0.00045 | 0.00719326 |
| 137 | C1orf116  | chr1:207191865-207206101  | PDT      | ATRA+PDT | 17.3812  | 23.2522  | 0.419839          | 0.0002  | 0.00358322 |
| 138 | C1orf130  | chr1:24882566-24935818    | PDT      | ATRA+PDT | 1.04809  | 2.20534  | 1.07323           | 0.00005 | 0.00102476 |
| 139 | C20orf96  | chr20:251503-271419       | PDT      | ATRA+PDT | 1.39756  | 2.5256   | 0.853715          | 0.00135 | 0.0171     |
| 140 | C22orf46  | chr22:42086546-42094140   | PDT      | ATRA+PDT | 2.23184  | 3.21502  | 0.526595          | 0.00005 | 0.00102476 |
| 141 | C2orf42   | chr2:70377016-70418151    | PDT      | ATRA+PDT | 2.01778  | 2.86738  | 0.506964          | 0.00425 | 0.0420979  |
| 142 | C2orf49   | chr2:105954012-105961984  | PDT      | ATRA+PDT | 12.3893  | 16.0922  | 0.377273          | 0.00375 | 0.0383182  |
| 143 | C2orf72   | chr2:231902280-231914427  | PDT      | ATRA+PDT | 1.31922  | 0.840518 | -0.65033          | 0.00305 | 0.0323415  |
| 144 | C5orf41   | chr5:172483354-172566291  | PDT      | ATRA+PDT | 7.08993  | 9.68801  | 0.45043           | 0.00005 | 0.00102476 |
| 145 | C6orf1    | chr6:34214156-34216904    | PDT      | ATRA+PDT | 4.87146  | 7.2764   | 0.578871          | 0.003   | 0.0318746  |
| 146 | C7orf46   | chr7:23719748-23742269    | PDT      | ATRA+PDT | 14.7916  | 19.7694  | 0.418488          | 0.00075 | 0.0109256  |
| 147 | C8orf84   | chr8:73976777-74005507    | PDT      | ATRA+PDT | 6.66596  | 4.13785  | -0.687932         | 0.00005 | 0.00102476 |
| 148 | C9orf152  | chr9:112961845-112970413  | PDT      | ATRA+PDT | 5.62529  | 3.32061  | -0.760478         | 0.00005 | 0.00102476 |
| 149 | CA9       | chr9:35673914-35681154    | PDT      | ATRA+PDT | 34.2291  | 25.0317  | -0.451469         | 0.0001  | 0.00194145 |
| 150 | CALB2     | chr16:71392615-71424342   | PDT      | ATRA+PDT | 89.8282  | 123.84   | 0.46324           | 0.00005 | 0.00102476 |
| 151 | CAMKK1    | chr17:3763616-3796337     | PDT      | ATRA+PDT | 5.71221  | 4.31302  | -0.405349         | 0.00185 | 0.0217319  |
| 152 | CAPN5     | chr11:76777991-76837198   | PDT      | ATRA+PDT | 4.82162  | 3.23871  | -0.574099         | 0.00005 | 0.00102476 |
| 153 | CAPN9     | chr1:230883129-230937749  | PDT      | ATRA+PDT | 1.45467  | 0.70276  | -1.04958          | 0.00145 | 0.0179618  |
| 154 | CARD10    | chr22:37886399-37915210   | PDT      | ATRA+PDT | 5.04292  | 6.86843  | 0.445722          | 0.0002  | 0.00358322 |
| 155 | CARD6     | chr5:40841409-40855456    | PDT      | ATRA+PDT | 0.883466 | 1.61116  | 0.866857          | 0.00005 | 0.00102476 |
| 156 | CASP4     | chr11:104813593-104839325 | PDT      | ATRA+PDT | 48.7865  | 59.6521  | 0.290091          | 0.00425 | 0.0420979  |
| 157 | CASP7     | chr10:115438934-115490664 | PDT      | ATRA+PDT | 20.5481  | 27.0151  | 0.394762          | 0.0001  | 0.00194145 |
| 158 | CASP9     | chr1:15818768-15851285    | PDT      | ATRA+PDT | 3.65432  | 5.51936  | 0.594897          | 0.00005 | 0.00102476 |
| 159 | CAV1      | chr7:116164838-116201239  | PDT      | ATRA+PDT | 10.8401  | 6.42212  | -0.755251         | 0.00005 | 0.00102476 |
| 160 | CAV2      | chr7:116139654-116148595  | PDT      | ATRA+PDT | 19.9623  | 13.9617  | -0.515804         | 0.00005 | 0.00102476 |
| 161 | CBLB      | chr3:105377108-105587887  | PDT      | ATRA+PDT | 2.45668  | 3.47512  | 0.500354          | 0.00015 | 0.00281494 |
| 162 | CBX7      | chr22:39526778-39548538   | PDT      | ATRA+PDT | 1.32238  | 2.05347  | 0.634922          | 0.00025 | 0.00439786 |
| 163 | CCDC112   | chr5:114602884-114632458  | PDT      | ATRA+PDT | 8.91704  | 11.5731  | 0.376144          | 0.0016  | 0.0194588  |
| 164 | CCDC117   | chr22:29168661-29185283   | PDT      | ATRA+PDT | 32.13    | 43.7731  | 0.446124          | 0.00005 | 0.00102476 |
| 165 | CCDC28A   | chr6:139046347-139114456  | PDT      | ATRA+PDT | 13.8248  | 17.8438  | 0.368169          | 0.0033  | 0.0346484  |
| 166 | CCDC34    | chr11:27360060-27384795   | PDT      | ATRA+PDT | 21.2716  | 16.3716  | -0.377735         | 0.00165 | 0.0198632  |
| 167 | CCDC68    | chr18:52568739-52626739   | PDT      | ATRA+PDT | 3.26671  | 2.34128  | -0.480542         | 0.0003  | 0.00511725 |
| 168 | CCDC86    | chr11:60609428-60623444   | PDT      | ATRA+PDT | 48.8511  | 37.736   | -0.372449         | 0.0002  | 0.00358322 |
| 169 | CCDC88C   | chr14:91737666-91884188   | PDT      | ATRA+PDT | 4.44669  | 5.82279  | 0.38898           | 0.0003  | 0.00511725 |
| 170 | CCL15     | chr17:34310691-34329084   | PDT      | ATRA+PDT | 15.6012  | 4.77259  | -1.70881          | 0.00005 | 0.00102476 |
| 171 | CCNA2     | chr4:122722471-122745088  | PDT      | ATRA+PDT | 58.14    | 44.5609  | -0.383754         | 0.00105 | 0.0140676  |
| 172 | CCNDBP1   | chr15:43477465-43489375   | PDT      | ATRA+PDT | 8.45993  | 12.1829  | 0.526144          | 0.00005 | 0.00102476 |
| 173 | CCNF      | chr16:2479394-2508859     | PDT      | ATRA+PDT | 12.2325  | 8.17091  | -0.582151         | 0.00005 | 0.00102476 |
| 174 | CCNG2     | chr4:78078356-78091213    | PDT      | ATRA+PDT | 11.3243  | 15.0479  | 0.410131          | 0.0001  | 0.00194145 |
| 175 | CCNJL     | chr5:159678670-159739573  | PDT      | ATRA+PDT | 3.33525  | 4.28638  | 0.361966          | 0.00435 | 0.0428104  |
| 176 | CD44      | chr11:35160416-35253949   | PDT      | ATRA+PDT | 98.6039  | 74.61    | -0.402276         | 0.00005 | 0.00102476 |
| 177 | CD55      | chr1:207494816-207534311  | PDT      | ATRA+PDT | 362.706  | 446.974  | 0.30139           | 0.00335 | 0.0351043  |
| 178 | CD58      | chr1:117057155-117113715  | PDT      | ATRA+PDT | 27.0231  | 20.3912  | -0.406248         | 0.00095 | 0.0131061  |
| 179 | CD68      | chr17:7482804-7485429     | PDT      | ATRA+PDT | 6.98815  | 9.08423  | 0.378455          | 0.00265 | 0.0286404  |
| 180 | CDC14B    | chr9:99262394-99382112    | PDT      | ATRA+PDT | 10.515   | 14.1561  | 0.428976          | 0.00005 | 0.00102476 |
| 181 | CDC25A    | chr3:48198667-48229801    | PDT      | ATRA+PDT | 19.8524  | 15.7683  | -0.332287         | 0.00125 | 0.0161202  |
| 182 | CDC42BPG  | chr11:64591661-64612041   | PDT      | ATRA+PDT | 2.57052  | 3.90719  | 0.604068          | 0.00005 | 0.00102476 |
| 183 | CDC42EP1  | chr22:37956470-37965410   | PDT      | ATRA+PDT | 29.3322  | 41.0904  | 0.486314          | 0.00005 | 0.00102476 |
| 184 | CDC42EP2  | chr11:65082288-65089900   | PDT      | ATRA+PDT | 29.0189  | 40.3226  | 0.474595          | 0.00005 | 0.00102476 |
| 185 | CDHR5     | chr11:616564-625067       | PDT      | ATRA+PDT | 3.37929  | 2.60197  | -0.377115         | 0.0046  | 0.0446535  |
| 186 | CDK6      | chr7:92234234-92465941    | PDT      | ATRA+PDT | 16.7786  | 20.8185  | 0.311246          | 0.001   | 0.0135165  |
| 187 | CDKN2AIP  | chr4:184365788-184369049  | PDT      | ATRA+PDT | 11.8498  | 14.9428  | 0.334588          | 0.0029  | 0.0310283  |
| 188 | CDKN2B    | chr9:21994789-22121093    | PDT      | ATRA+PDT | 9.39304  | 18.1238  | 0.94822           | 0.00005 | 0.00102476 |
| 189 | CEACAM1   | chr19:43011457-43032661   | PDT      | ATRA+PDT | 18.4867  | 22.8958  | 0.308597          | 0.0025  | 0.027212   |
| 190 | CEACAM5   | chr19:42212529-42234437   | PDT      | ATRA+PDT | 12.0597  | 5.06265  | -1.25223          | 0.00005 | 0.00102476 |
| 191 | CEACAM6   | chr19:42259397-42276113   | PDT      | ATRA+PDT | 47.7562  | 22.2689  | -1.10066          | 0.00005 | 0.00102476 |
| 192 | CEBPA     | chr19:33790839-33793430   | PDT      | ATRA+PDT | 7.40735  | 5.55553  | -0.415033         | 0.0014  | 0.0175049  |
| 193 | CEBPD     | chr8:48649475-48650726    | PDT      | ATRA+PDT | 6.30402  | 9.0375   | 0.519651          | 0.0003  | 0.00511725 |
| 194 | CELSR1    | chr22:46756730-46933067   | PDT      | ATRA+PDT | 0.901511 | 1.32008  | 0.550213          | 0.00005 | 0.00102476 |
| 195 | CEP120    | chr5:122680578-122759286  | PDT      | ATRA+PDT | 5.71684  | 7.40525  | 0.373331          | 0.00065 | 0.00978942 |
| 196 | CEP128    | chr14:80962820-81405884   | PDT      | ATRA+PDT | 1.26871  | 1.81083  | 0.513293          | 0.0017  | 0.0202822  |
| 197 | CEP135    | chr4:56815036-56899527    | PDT      | ATRA+PDT | 4.08846  | 5.34231  | 0.385909          | 0.0008  | 0.0114972  |
| 198 | CEP170    | chr1:243287729-243418708  | PDT      | ATRA+PDT | 5.2673   | 6.54725  | 0.313827          | 0.00355 | 0.0368028  |
| 199 | CEP41     | chr7:130036374-130080854  | PDT      | ATRA+PDT | 2.04751  | 3.43399  | 0.746012          | 0.00005 | 0.00102476 |
| 200 | CEP70     | chr3:138213186-138313129  |          |          |          |          |                   |         |            |

Table S1: Significant differentially expressed genes (DEGs) after ATRA+PDT compared to PDT.

| #   | gene      | locus                     | sample_1 | sample_2 | value_1  | value_2 | log2(fold_change) | p_value | q_value    |
|-----|-----------|---------------------------|----------|----------|----------|---------|-------------------|---------|------------|
| 205 | CHD2      | chr15:93443550-93571237   | PDT      | ATRA+PDT | 32.4564  | 43.5391 | 0.423808          | 0.00005 | 0.00102476 |
| 206 | CHORDC1   | chr11:89933596-89956532   | PDT      | ATRA+PDT | 94.5056  | 117.498 | 0.314168          | 0.00135 | 0.0171     |
| 207 | CHPF      | chr2:220403668-220408487  | PDT      | ATRA+PDT | 4.02569  | 3.01637 | -0.416425         | 0.0033  | 0.0346484  |
| 208 | CHPT1     | chr12:102091416-102133250 | PDT      | ATRA+PDT | 15.0998  | 8.0349  | -0.910182         | 0.00005 | 0.00102476 |
| 209 | CHST4     | chr16:71560022-71572493   | PDT      | ATRA+PDT | 0.355725 | 1.21076 | 1.76709           | 0.00015 | 0.00281494 |
| 210 | CIB1      | chr15:90773476-90777279   | PDT      | ATRA+PDT | 112.778  | 140.187 | 0.313869          | 0.00245 | 0.0267496  |
| 211 | CIRBP     | chr19:1267469-1274809     | PDT      | ATRA+PDT | 41.7846  | 53.1301 | 0.346557          | 0.00195 | 0.0225592  |
| 212 | CKAP2L    | chr2:113495443-113522254  | PDT      | ATRA+PDT | 9.43968  | 7.47605 | -0.336462         | 0.0036  | 0.0371409  |
| 213 | CKB       | chr14:103985994-103989196 | PDT      | ATRA+PDT | 72.3156  | 50.3455 | -0.522445         | 0.00005 | 0.00102476 |
| 214 | CLCF1     | chr11:67085309-67159158   | PDT      | ATRA+PDT | 33.6729  | 52.7771 | 0.648324          | 0.00005 | 0.00102476 |
| 215 | CLDN1     | chr3:190023489-190040235  | PDT      | ATRA+PDT | 15.3463  | 21.516  | 0.487519          | 0.00005 | 0.00102476 |
| 216 | CLDN12    | chr7:90032647-90045268    | PDT      | ATRA+PDT | 29.5243  | 42.4496 | 0.523846          | 0.00005 | 0.00102476 |
| 217 | CLDN2     | chrX:106143292-106174091  | PDT      | ATRA+PDT | 19.9892  | 11.7522 | -0.766294         | 0.00005 | 0.00102476 |
| 218 | CLIC5     | chr6:45866189-46048085    | PDT      | ATRA+PDT | 1.02119  | 1.59094 | 0.639622          | 0.00235 | 0.0259765  |
| 219 | CLIP2     | chr7:73703804-73820273    | PDT      | ATRA+PDT | 2.2237   | 1.393   | -0.674764         | 0.00005 | 0.00102476 |
| 220 | CLK1      | chr2:201717731-201729467  | PDT      | ATRA+PDT | 103.345  | 137.873 | 0.415875          | 0.00005 | 0.00102476 |
| 221 | CLK4      | chr5:178029664-178054054  | PDT      | ATRA+PDT | 6.81798  | 8.81923 | 0.371308          | 0.00275 | 0.0296013  |
| 222 | CLMN      | chr14:95648275-95786245   | PDT      | ATRA+PDT | 2.9246   | 3.76489 | 0.364365          | 0.00055 | 0.0085238  |
| 223 | CLN8      | chr8:1711869-1734736      | PDT      | ATRA+PDT | 2.529    | 1.89329 | -0.417668         | 0.00105 | 0.0140676  |
| 224 | CLP1      | chr11:57425215-57429337   | PDT      | ATRA+PDT | 13.7435  | 9.95338 | -0.465492         | 0.0003  | 0.00511725 |
| 225 | CLRN3     | chr10:129676113-129691211 | PDT      | ATRA+PDT | 7.69706  | 5.49485 | -0.486227         | 0.004   | 0.0401429  |
| 226 | CLU       | chr8:27454433-27472328    | PDT      | ATRA+PDT | 4.61759  | 10.0572 | 1.12302           | 0.00005 | 0.00102476 |
| 227 | CMTM3     | chr16:66637934-66647795   | PDT      | ATRA+PDT | 6.29977  | 9.54492 | 0.599434          | 0.00005 | 0.00102476 |
| 228 | CMTM7     | chr3:32433162-32496333    | PDT      | ATRA+PDT | 17.8085  | 23.9263 | 0.426029          | 0.00045 | 0.00719326 |
| 229 | CNGA1     | chr4:47937993-48014961    | PDT      | ATRA+PDT | 0.664166 | 1.77801 | 1.42065           | 0.00005 | 0.00102476 |
| 230 | CNKSRI    | chr1:26503980-26516375    | PDT      | ATRA+PDT | 8.17194  | 10.6539 | 0.382633          | 0.00145 | 0.0179618  |
| 231 | CNTRL     | chr9:123850573-123939886  | PDT      | ATRA+PDT | 5.08383  | 6.99577 | 0.460567          | 0.0001  | 0.00194145 |
| 232 | COL17A1   | chr10:105791045-105845638 | PDT      | ATRA+PDT | 13.9053  | 9.03744 | -0.621652         | 0.00005 | 0.00102476 |
| 233 | COL18A1   | chr21:46825096-46933634   | PDT      | ATRA+PDT | 2.93481  | 2.10741 | -0.477797         | 0.00015 | 0.00281494 |
| 234 | COTL1     | chr16:84599203-84651669   | PDT      | ATRA+PDT | 110.534  | 141.466 | 0.355972          | 0.0002  | 0.00358322 |
| 235 | CPT1A     | chr11:68522087-68609399   | PDT      | ATRA+PDT | 47.0072  | 30.818  | -0.60911          | 0.00005 | 0.00102476 |
| 236 | CRABP2    | chr1:156669399-156675608  | PDT      | ATRA+PDT | 154.472  | 108.962 | -0.50352          | 0.00005 | 0.00102476 |
| 237 | CREB5     | chr7:28338939-28865511    | PDT      | ATRA+PDT | 3.6883   | 8.02894 | 1.12225           | 0.00005 | 0.00102476 |
| 238 | CRELD1    | chr3:9975523-9987097      | PDT      | ATRA+PDT | 4.03205  | 2.67534 | -0.59179          | 0.0005  | 0.00788626 |
| 239 | CRISPLD2  | chr16:84853586-84943116   | PDT      | ATRA+PDT | 0.782842 | 1.32989 | 0.764514          | 0.0003  | 0.00511725 |
| 240 | CSPG4     | chr15:75966662-76005189   | PDT      | ATRA+PDT | 3.78188  | 1.95068 | -0.955129         | 0.00005 | 0.00102476 |
| 241 | CSRNP1    | chr3:39183341-39195102    | PDT      | ATRA+PDT | 4.48779  | 7.52922 | 0.746495          | 0.00005 | 0.00102476 |
| 242 | CTSE      | chr1:206317458-206332104  | PDT      | ATRA+PDT | 8.26341  | 5.46912 | -0.595429         | 0.00005 | 0.00102476 |
| 243 | CTSS      | chr1:150702671-150738433  | PDT      | ATRA+PDT | 0.43546  | 1.76088 | 2.01569           | 0.00005 | 0.00102476 |
| 244 | CTTNBP2NL | chr1:112938799-113003786  | PDT      | ATRA+PDT | 30.9598  | 43.1174 | 0.477873          | 0.00005 | 0.00102476 |
| 245 | CXCL1     | chr4:74735108-74737019    | PDT      | ATRA+PDT | 5.62294  | 11.2404 | 0.999296          | 0.00005 | 0.00102476 |
| 246 | CXCL16    | chr17:4634722-4643223     | PDT      | ATRA+PDT | 3.56652  | 6.74273 | 0.918813          | 0.00005 | 0.00102476 |
| 247 | CXCL2     | chr4:74962753-74964997    | PDT      | ATRA+PDT | 1.67488  | 2.92825 | 0.805984          | 0.00395 | 0.0398659  |
| 248 | CXCL3     | chr4:74902311-74904490    | PDT      | ATRA+PDT | 3.00394  | 5.38244 | 0.841402          | 0.00015 | 0.00281494 |
| 249 | CXCR4     | chr2:136871918-136875725  | PDT      | ATRA+PDT | 17.1971  | 12.0182 | -0.51694          | 0.0001  | 0.00194145 |
| 250 | CXXC5     | chr5:139028300-139062680  | PDT      | ATRA+PDT | 19.0937  | 13.8853 | -0.459533         | 0.0002  | 0.00358322 |
| 251 | CYB5RL    | chr1:54638026-54665746    | PDT      | ATRA+PDT | 2.05215  | 1.21173 | -0.760073         | 0.00025 | 0.00439786 |
| 252 | CYP1A1    | chr15:75011882-75017877   | PDT      | ATRA+PDT | 6.05798  | 9.12181 | 0.590483          | 0.00005 | 0.00102476 |
| 253 | CYP24A1   | chr20:52769987-52790516   | PDT      | ATRA+PDT | 0.491874 | 2.60664 | 2.40583           | 0.00005 | 0.00102476 |
| 254 | CYP2B6    | chr19:41497203-41524301   | PDT      | ATRA+PDT | 0.928489 | 1.77284 | 0.933107          | 0.00015 | 0.00281494 |
| 255 | CYP2S1    | chr19:41699114-41713444   | PDT      | ATRA+PDT | 23.4328  | 31.7265 | 0.437162          | 0.0001  | 0.00194145 |
| 256 | CYP3A5    | chr7:99245812-99277621    | PDT      | ATRA+PDT | 65.7934  | 91.3335 | 0.473202          | 0.00005 | 0.00102476 |
| 257 | CYR61     | chr1:86046443-86049648    | PDT      | ATRA+PDT | 4.62284  | 7.36744 | 0.672385          | 0.00005 | 0.00102476 |
| 258 | DAPK1     | chr9:90112755-90323549    | PDT      | ATRA+PDT | 9.61867  | 13.932  | 0.53449           | 0.00005 | 0.00102476 |
| 259 | DAPP1     | chr4:100737980-100791346  | PDT      | ATRA+PDT | 1.78116  | 2.99943 | 0.751871          | 0.00005 | 0.00102476 |
| 260 | DDC       | chr7:50526133-50633154    | PDT      | ATRA+PDT | 11.9731  | 4.23146 | -1.50057          | 0.00005 | 0.00102476 |
| 261 | DDIT4     | chr10:74033676-74035797   | PDT      | ATRA+PDT | 177.845  | 221.999 | 0.319935          | 0.00115 | 0.0151042  |
| 262 | DDX60L    | chr4:169277885-169401638  | PDT      | ATRA+PDT | 1.0759   | 1.9709  | 0.873306          | 0.00005 | 0.00102476 |
| 263 | DEDD2     | chr19:42702751-42721813   | PDT      | ATRA+PDT | 127.921  | 162.117 | 0.341777          | 0.0006  | 0.00910057 |
| 264 | DEGS2     | chr14:100612752-100626012 | PDT      | ATRA+PDT | 3.86987  | 2.3815  | -0.700417         | 0.0022  | 0.024728   |
| 265 | DENND3    | chr8:142138719-142205900  | PDT      | ATRA+PDT | 7.69182  | 10.605  | 0.463353          | 0.00005 | 0.00102476 |
| 266 | DEPDC1B   | chr5:59892738-59995993    | PDT      | ATRA+PDT | 17.2863  | 22.3816 | 0.372682          | 0.0003  | 0.00511725 |
| 267 | DEXI      | chr16:11022747-11036257   | PDT      | ATRA+PDT | 8.73179  | 6.4536  | -0.436174         | 0.00065 | 0.00978942 |
| 268 | DGAT2     | chr11:75479777-75512581   | PDT      | ATRA+PDT | 5.80363  | 3.82    | -0.603383         | 0.00005 | 0.00102476 |
| 269 | DHODH     | chr16:72042642-72059316   | PDT      | ATRA+PDT | 8.02902  | 6.1418  | -0.386561         | 0.00275 | 0.0296013  |
| 270 | DHRS3     | chr1:12627938-12677820    | PDT      | ATRA+PDT | 7.01205  | 21.5381 | 1.61899           | 0.00005 | 0.00102476 |
| 271 | DIP2C     | chr10:320129-735608       | PDT      | ATRA+PDT | 1.47699  | 2.23676 | 0.598746          | 0.00005 | 0.00102476 |
| 272 | DKK1      | chr10:54074040-54077417   | PDT      | ATRA+PDT | 67.0006  | 99.9039 | 0.576367          | 0.00005 | 0.00102476 |
| 273 | DMTF1     | chr7:86781676-86849031    | PDT      | ATRA+PDT | 23.6529  | 30.6114 | 0.372051          | 0.00125 | 0.0161202  |
| 274 | DNAJA1    | chr9:33025208-33039062    | PDT      | ATRA+PDT | 581.316  | 721.099 | 0.310875          | 0.003   | 0.0318746  |
| 275 | DNAJA4    | chr15:78556486-78574538   | PDT      | ATRA+PDT | 57.131   | 87.063  | 0.607786          | 0.00005 | 0.00102476 |
| 276 | DNAJB1    | chr19:14625581-14629201   | PDT      | ATRA+PDT | 531.15   | 857.804 | 0.691529          | 0.00005 | 0.00102476 |
| 277 | DNAJB4    | chr1:78470635-78482995    | PDT      | ATRA+PDT | 72.7418  | 98.3063 | 0.4345            | 0.00005 | 0.00102476 |
| 278 | DNAJB9    | chr7:108210188-108215294  | PDT      | ATRA+PDT | 37.4037  | 26.737  | -0.484344         | 0.00005 | 0.00102476 |
| 279 | DNAJC22   | chr12:49741040-49745685   | PDT      | ATRA+PDT | 6.21878  | 4.60419 | -0.433685         | 0.0018  | 0.0212615  |
| 280 | DNAJC3    | chr13:96329392-96447243   | PDT      | ATRA+PDT | 19.6839  | 15.3869 | -0.355314         | 0.0004  | 0.00650107 |
| 281 | DNMT3A    | chr2:25455829-25565459    | PDT      | ATRA+PDT | 1.09346  | 1.85713 | 0.764178          | 0.00005 | 0.00102476 |
| 282 | DOCK5     | chr8:25042286-25270619    | PDT      | ATRA+PDT | 5.07166  | 6.63786 | 0.38826           | 0.0002  | 0.00358322 |
| 283 | DPEP1     | chr16:89679715-89704839   | PDT      | ATRA+PDT | 6.81875  | 2.92142 | -1.22284          | 0.00005 | 0.00102476 |
| 284 | DPP4      | chr2:162848754-162931052  | PDT      | ATRA+PDT | 8.24666  | 4.60386 | -0.840966         | 0.00005 | 0.00102476 |
| 285 | DPP9      | chr19:4675243-4723855     | PDT      | ATRA+PDT | 18.5075  | 23.507  | 0.344986          | 0.0006  | 0.00910057 |
| 286 | DST       | chr6:56322784-56507694    | PDT      | ATRA+PDT | 13.8114  | 10.3563 | -0.415349         | 0.00005 | 0.00102476 |
| 287 | DTX3L     | chr3:122246759-122294049  | PDT      | ATRA+PDT | 14.324   | 21.944  | 0.615392          | 0.00005 | 0.00102476 |
| 288 | DUSP1     | chr5:172195092-172198203  | PDT      | ATRA+PDT | 37.0726  | 70.0712 | 0.918467          | 0.00005 | 0.00102476 |
| 289 | DUSP16    | chr12:12626215-12715448   | PDT      | ATRA+PDT | 21.2594  | 25.9134 | 0.285595          | 0.0035  | 0.0363197  |
| 290 | DUSP2     | chr2:96808907-96811179    | PDT      | ATRA+PDT | 12.1886  | 26.538  | 1.12252           | 0.00005 | 0.00102476 |
| 291 | DUSP5     | chr10:112257624-112271302 | PDT      | ATRA+PDT | 39.574   | 55.5091 | 0.488171          | 0.00005 | 0.00102476 |
| 292 | DVL1      | chr1:1270657-1284492      | PDT      | ATRA+PDT | 31.0137  | 24.4283 | -0.344352         | 0.00085 | 0.0119898  |
| 293 | DYRK2     | chr12:68042511-68056444   | PDT      | ATRA+PDT | 11.899   | 8.84758 | -0.427486         | 0.00005 | 0.00102476 |
| 294 | E2F7      | chr12:77415025-77459360   | PDT      | ATRA+PDT | 13.4159  | 17.4383 | 0.378318          | 0.0001  | 0.00194145 |
| 295 | ECE2      | chr3:183967444-184010819  | PDT      | ATRA+PDT | 17.6741  | 10.8401 | -0.705252         | 0.00005 | 0.00102476 |
| 296 | ECM1      | chr1:150480486-150486265  | PDT      | ATRA+PDT | 2.36948  | 1.44101 | -0.717492         | 0.0014  | 0.0175049  |
| 297 | EDN1      | chr6:12290528-12297427    | PDT      | ATRA+PDT | 14.2647  | 22.7092 | 0.670833          | 0.00005 | 0.00102476 |
| 298 | EEF1A2    | chr20:62119365-62130505   | PDT      | ATRA+PDT | 29.2765  | 20.1294 | -0.540436         | 0.00005 | 0.00102476 |
| 299 | EEPD1     | chr7:36192835-36341152    | PDT      | ATRA+PDT | 6.13859  | 7.7133  | 0.32944           | 0.00375 | 0.0383182  |
| 300 | EFCAB4A   | chr11:827584-831991       | PDT      | ATRA+PDT | 11.8512  | 8.80399 | -0.428809         | 0.0006  | 0.00910057 |
| 301 | EFNA1     | chr1:155100348-155107386  | PDT      | ATRA+PDT | 23.3266  | 18.0179 | -0.372544         | 0.0014  | 0.0175049  |
| 302 | EGLN1     | chr1:231499496-231560790  | PDT      | ATRA+PDT | 4.00706  | 5.21901 | 0.381232          | 0.001   |            |

Table S1: Significant differentially expressed genes (DEGs) after ATRA+PDT compared to PDT.

| #   | gene       | locus                         | sample_1 | sample_2 | value_1  | value_2 | log2(fold_change) | p_value | q_value    |
|-----|------------|-------------------------------|----------|----------|----------|---------|-------------------|---------|------------|
| 307 | EIF4A2     | chr3:186501360-186524484      | PDT      | ATRA+PDT | 163.926  | 206.699 | 0.334491          | 0.00135 | 0.0171     |
| 308 | EIF5A2     | chr3:170606203-170626426      | PDT      | ATRA+PDT | 3.07978  | 2.33192 | -0.401311         | 0.00215 | 0.0243712  |
| 309 | ELAC2      | chr17:12692828-12921381       | PDT      | ATRA+PDT | 18.7339  | 15.1593 | -0.305453         | 0.00335 | 0.0351043  |
| 310 | ELF3       | chr1:201979689-201986315      | PDT      | ATRA+PDT | 37.099   | 66.1482 | 0.834321          | 0.00005 | 0.00102476 |
| 311 | ELOVL6     | chr4:110970228-111119820      | PDT      | ATRA+PDT | 17.373   | 14.134  | -0.297673         | 0.0044  | 0.0431831  |
| 312 | EMP1       | chr12:13349601-13369708       | PDT      | ATRA+PDT | 67.9701  | 92.6699 | 0.447201          | 0.00005 | 0.00102476 |
| 313 | ENDOD1     | chr11:94822973-94865815       | PDT      | ATRA+PDT | 11.7833  | 7.78629 | -0.59773          | 0.00005 | 0.00102476 |
| 314 | ENG        | chr9:130577290-130617047      | PDT      | ATRA+PDT | 4.39529  | 2.73046 | -0.686818         | 0.00005 | 0.00102476 |
| 315 | ENTPD5     | chr14:74433180-74486026       | PDT      | ATRA+PDT | 4.50015  | 3.24469 | -0.471895         | 0.00265 | 0.0286404  |
| 316 | EPB41L1    | chr20:34700347-34820721       | PDT      | ATRA+PDT | 22.7706  | 34.5998 | 0.603593          | 0.00005 | 0.00102476 |
| 317 | EPB49      | chr8:21911080-21940036        | PDT      | ATRA+PDT | 3.52815  | 2.54822 | -0.469422         | 0.0015  | 0.0184954  |
| 318 | EPC1       | chr10:32557858-32636113       | PDT      | ATRA+PDT | 12.8604  | 17.367  | 0.433417          | 0.0001  | 0.00194145 |
| 319 | EPHA2      | chr1:16450831-16482582        | PDT      | ATRA+PDT | 40.8386  | 66.5434 | 0.704364          | 0.00005 | 0.00102476 |
| 320 | EPHB6      | chr7:142552791-142568847      | PDT      | ATRA+PDT | 7.61521  | 5.03569 | -0.596695         | 0.00005 | 0.00102476 |
| 321 | EPN3       | chr17:48610047-48621111       | PDT      | ATRA+PDT | 2.3054   | 1.62994 | -0.500193         | 0.00135 | 0.0171     |
| 322 | ERAP2      | chr5:96211643-96255406        | PDT      | ATRA+PDT | 11.845   | 23.0945 | 0.963269          | 0.00005 | 0.00102476 |
| 323 | ERCC6L     | chrX:71401525-71483814        | PDT      | ATRA+PDT | 8.34576  | 6.30818 | -0.403821         | 0.00425 | 0.0420979  |
| 324 | EREG       | chr4:75230859-75254477        | PDT      | ATRA+PDT | 109.653  | 161.325 | 0.557018          | 0.00005 | 0.00102476 |
| 325 | ERN1       | chr17:62120389-62207502       | PDT      | ATRA+PDT | 4.52517  | 6.46555 | 0.514798          | 0.00005 | 0.00102476 |
| 326 | ERRF1      | chr1:8071778-8086393          | PDT      | ATRA+PDT | 345.906  | 470.603 | 0.444132          | 0.00005 | 0.00102476 |
| 327 | ERVMER34-1 | chr4:53609683-53617807        | PDT      | ATRA+PDT | 3.02422  | 2.13684 | -0.501086         | 0.00135 | 0.0171     |
| 328 | ESAM       | chr11:124623018-124632223     | PDT      | ATRA+PDT | 29.0409  | 36.6252 | 0.334753          | 0.00175 | 0.0207397  |
| 329 | ETS1       | chr11:128328655-128457453     | PDT      | ATRA+PDT | 14.9045  | 20.5587 | 0.464007          | 0.00005 | 0.00102476 |
| 330 | ETV1       | chr7:13930855-14031050        | PDT      | ATRA+PDT | 0.749919 | 1.22532 | 0.70835           | 0.00005 | 0.00102476 |
| 331 | ETV6       | chr12:11802787-12048325       | PDT      | ATRA+PDT | 7.4987   | 10.5491 | 0.492402          | 0.00005 | 0.00102476 |
| 332 | EXOC8      | chr1:231468481-231473578      | PDT      | ATRA+PDT | 7.75358  | 6.02451 | -0.36402          | 0.00085 | 0.0119898  |
| 333 | EXPH5      | chr11:108376157-108464374     | PDT      | ATRA+PDT | 6.8025   | 8.9817  | 0.400923          | 0.00005 | 0.00102476 |
| 334 | F2R        | chr5:76011867-76031595        | PDT      | ATRA+PDT | 5.86953  | 9.46569 | 0.689462          | 0.00005 | 0.00102476 |
| 335 | F2RL1      | chr5:76114832-76131140        | PDT      | ATRA+PDT | 49.4055  | 65.413  | 0.404907          | 0.00005 | 0.00102476 |
| 336 | F5         | chr1:169481191-169555769      | PDT      | ATRA+PDT | 10.6716  | 6.61326 | -0.690341         | 0.00005 | 0.00102476 |
| 337 | FAAH       | chr1:46859938-46879520        | PDT      | ATRA+PDT | 5.50656  | 7.94572 | 0.529027          | 0.00005 | 0.00102476 |
| 338 | FAM102B    | chr1:109102970-109181949      | PDT      | ATRA+PDT | 6.13952  | 8.4052  | 0.453155          | 0.0001  | 0.00194145 |
| 339 | FAM105A    | chr5:14581890-14616287        | PDT      | ATRA+PDT | 2.59782  | 1.64428 | -0.659843         | 0.00005 | 0.00102476 |
| 340 | FAM107B    | chr10:14560558-14816896       | PDT      | ATRA+PDT | 59.2022  | 73.3432 | 0.309013          | 0.0012  | 0.0156263  |
| 341 | FAM108C1   | chr15:80987651-81047962       | PDT      | ATRA+PDT | 32.8262  | 26.161  | -0.327426         | 0.00155 | 0.0189586  |
| 342 | FAM111B    | chr11:58874657-58894888       | PDT      | ATRA+PDT | 31.7401  | 24.7476 | -0.359017         | 0.0006  | 0.00910057 |
| 343 | FAM123B    | chrX:63404996-63425624        | PDT      | ATRA+PDT | 1.69093  | 1.18022 | -0.518764         | 0.00005 | 0.00102476 |
| 344 | FAM127B    | chrX:134184962-134186221      | PDT      | ATRA+PDT | 16.058   | 21.8891 | 0.446926          | 0.004   | 0.0401429  |
| 345 | FAM131B    | chr7:143050492-143059840      | PDT      | ATRA+PDT | 0.409476 | 3.47658 | 3.08582           | 0.00005 | 0.00102476 |
| 346 | FAM135A    | chr6:71123106-71270877        | PDT      | ATRA+PDT | 18.3524  | 13.9109 | -0.399752         | 0.00015 | 0.00281494 |
| 347 | FAM13A     | chr4:89630939-89978323        | PDT      | ATRA+PDT | 4.12024  | 7.15203 | 0.795624          | 0.00005 | 0.00102476 |
| 348 | FAM149A    | chr4:187065994-187093817      | PDT      | ATRA+PDT | 8.48109  | 16.2294 | 0.936285          | 0.00005 | 0.00102476 |
| 349 | FAM149B1   | chr10:74927876-75001939       | PDT      | ATRA+PDT | 3.59557  | 4.85356 | 0.432823          | 0.0011  | 0.0146092  |
| 350 | FAM162A    | chr3:122103022-122128961      | PDT      | ATRA+PDT | 82.1723  | 61.1637 | -0.425977         | 0.0001  | 0.00194145 |
| 351 | FAM174B    | chr15:93160678-93199031       | PDT      | ATRA+PDT | 7.42036  | 5.03265 | -0.560172         | 0.00005 | 0.00102476 |
| 352 | FAM198B    | chr4:159045731-159094202      | PDT      | ATRA+PDT | 12.9282  | 7.67835 | -0.751657         | 0.00005 | 0.00102476 |
| 353 | FAM210A    | chr18:13663345-13726591       | PDT      | ATRA+PDT | 15.116   | 11.8696 | -0.3488           | 0.0012  | 0.0156263  |
| 354 | FAM3D      | chr3:58619669-58652561        | PDT      | ATRA+PDT | 8.77298  | 4.24277 | -1.04806          | 0.00005 | 0.00102476 |
| 355 | FAM63B     | chr15:59063392-59149734       | PDT      | ATRA+PDT | 2.30668  | 3.07012 | 0.412473          | 0.00105 | 0.0140676  |
| 356 | FAM81A     | chr15:59730371-59815751       | PDT      | ATRA+PDT | 5.00287  | 3.87761 | -0.367588         | 0.0046  | 0.0446535  |
| 357 | FAM84B     | chr8:127564682-127570711      | PDT      | ATRA+PDT | 127.905  | 156.797 | 0.293824          | 0.00435 | 0.0428104  |
| 358 | FAM86EP    | chr4:3943668-3957148          | PDT      | ATRA+PDT | 1.55741  | 2.30187 | 0.563655          | 0.00065 | 0.00978942 |
| 359 | FAM98A     | chr2:33808728-33824362        | PDT      | ATRA+PDT | 27.1483  | 20.8592 | -0.380176         | 0.0003  | 0.00511725 |
| 360 | FANCF      | chr11:22644078-22647387       | PDT      | ATRA+PDT | 4.17794  | 5.47064 | 0.388919          | 0.0024  | 0.0263926  |
| 361 | FAS        | chr10:90694830-90775542       | PDT      | ATRA+PDT | 2.10634  | 1.40791 | -0.581187         | 0.0034  | 0.0355585  |
| 362 | FBXL19-AS1 | chr16:30930639-30934590       | PDT      | ATRA+PDT | 1.41865  | 2.01877 | 0.508954          | 0.0021  | 0.0238805  |
| 363 | FBXO32     | chr8:124510126-124553493      | PDT      | ATRA+PDT | 4.9402   | 6.10708 | 0.305914          | 0.00455 | 0.0443293  |
| 364 | FEM1C      | chr5:114856607-114880591      | PDT      | ATRA+PDT | 30.0869  | 38.8026 | 0.36702           | 0.0002  | 0.00358322 |
| 365 | FER        | chr5:108083522-108523373      | PDT      | ATRA+PDT | 2.62255  | 3.97463 | 0.59985           | 0.00005 | 0.00102476 |
| 366 | FEZ2       | chr2:36779403-36825332        | PDT      | ATRA+PDT | 21.8097  | 26.8895 | 0.302071          | 0.0049  | 0.0470101  |
| 367 | FGD3       | chr9:95709600-95798518        | PDT      | ATRA+PDT | 1.54982  | 2.16782 | 0.484138          | 0.00495 | 0.0474046  |
| 368 | FGF19      | chr11:69513005-69519106       | PDT      | ATRA+PDT | 6.27328  | 25.0306 | 1.9964            | 0.00005 | 0.00102476 |
| 369 | FGFR2      | chr10:123237843-123357972     | PDT      | ATRA+PDT | 8.45316  | 13.0471 | 0.626161          | 0.00005 | 0.00102476 |
| 370 | FHL2       | chr2:105977282-106055230      | PDT      | ATRA+PDT | 60.6957  | 86.9494 | 0.518583          | 0.00005 | 0.00102476 |
| 371 | FHL3       | chr1:38462441-38471187        | PDT      | ATRA+PDT | 12.2879  | 16.2252 | 0.400995          | 0.00185 | 0.0217319  |
| 372 | FIGNL1     | chr7:50511831-50518088        | PDT      | ATRA+PDT | 13.0673  | 10.5123 | -0.313882         | 0.00345 | 0.0359757  |
| 373 | FLNB       | chr3:57994126-58157982        | PDT      | ATRA+PDT | 89.7689  | 121.2   | 0.433102          | 0.00005 | 0.00102476 |
| 374 | FLOT1      | chr6_ssto_hap7:2027817-204277 | PDT      | ATRA+PDT | 49.3978  | 62.6809 | 0.343578          | 0.001   | 0.0135165  |
| 375 | FLRT3      | chr20:13976145-16033841       | PDT      | ATRA+PDT | 1.48851  | 2.13722 | 0.521865          | 0.0014  | 0.0175049  |
| 376 | FOS        | chr14:75745480-75748937       | PDT      | ATRA+PDT | 9.11561  | 13.3146 | 0.546601          | 0.00005 | 0.00102476 |
| 377 | FOSB       | chr19:45971252-45978437       | PDT      | ATRA+PDT | 2.84898  | 5.04937 | 0.825659          | 0.00005 | 0.00102476 |
| 378 | FOSL1      | chr11:65659691-65667997       | PDT      | ATRA+PDT | 152.947  | 219.618 | 0.521971          | 0.00005 | 0.00102476 |
| 379 | FOXL1      | chr16:86612114-86615304       | PDT      | ATRA+PDT | 1.38773  | 2.05807 | 0.568566          | 0.0021  | 0.0238805  |
| 380 | FOXN2      | chr2:48541794-48606434        | PDT      | ATRA+PDT | 13.7006  | 17.568  | 0.358703          | 0.00015 | 0.00281494 |
| 381 | FRMD4B     | chr3:69219145-69435430        | PDT      | ATRA+PDT | 2.05717  | 3.05091 | 0.568578          | 0.00005 | 0.00102476 |
| 382 | FRRS1      | chr1:100111430-100231349      | PDT      | ATRA+PDT | 9.3853   | 14.3505 | 0.612622          | 0.00005 | 0.00102476 |
| 383 | FRYL       | chr4:48499379-48782316        | PDT      | ATRA+PDT | 8.78851  | 10.6727 | 0.280238          | 0.00455 | 0.0443293  |
| 384 | FSTL3      | chr19:676388-683392           | PDT      | ATRA+PDT | 1.03427  | 1.77411 | 0.778476          | 0.00085 | 0.0119898  |
| 385 | FTSJD1     | chr16:71316202-71323509       | PDT      | ATRA+PDT | 37.7123  | 52.1353 | 0.467224          | 0.00005 | 0.00102476 |
| 386 | FUT4       | chr11:94277016-94283064       | PDT      | ATRA+PDT | 18.9388  | 15.3605 | -0.302118         | 0.0023  | 0.0255827  |
| 387 | FUT8       | chr14:65877309-66210839       | PDT      | ATRA+PDT | 1.64239  | 1.10566 | -0.570888         | 0.0011  | 0.0146092  |
| 388 | FXYD3      | chr19:35606731-35615228       | PDT      | ATRA+PDT | 17.5797  | 8.62688 | -1.027            | 0.00005 | 0.00102476 |
| 389 | FYN        | chr6:111981534-112194655      | PDT      | ATRA+PDT | 5.51577  | 3.87692 | -0.50865          | 0.0001  | 0.00194145 |
| 390 | GAB1       | chr4:144257982-144395718      | PDT      | ATRA+PDT | 6.95646  | 8.89793 | 0.355116          | 0.00095 | 0.0131061  |
| 391 | GAB2       | chr11:77926335-78128868       | PDT      | ATRA+PDT | 1.8574   | 2.53823 | 0.45054           | 0.00075 | 0.0109256  |
| 392 | GABRP      | chr5:170210722-170241050      | PDT      | ATRA+PDT | 1.85944  | 4.52118 | 1.28183           | 0.00005 | 0.00102476 |
| 393 | GADD45A    | chr1:68150859-68154021        | PDT      | ATRA+PDT | 32.4531  | 53.294  | 0.715616          | 0.00005 | 0.00102476 |
| 394 | GADD45B    | chr19:2476122-2478257         | PDT      | ATRA+PDT | 3.93333  | 7.29827 | 0.891804          | 0.00005 | 0.00102476 |
| 395 | GALM       | chr2:38893051-38961909        | PDT      | ATRA+PDT | 7.12751  | 9.34785 | 0.391235          | 0.00205 | 0.0234618  |
| 396 | GALNT6     | chr12:51745832-51785200       | PDT      | ATRA+PDT | 1.32323  | 1.87155 | 0.500173          | 0.002   | 0.0229388  |
| 397 | GATA2      | chr3:128198264-128212030      | PDT      | ATRA+PDT | 2.09529  | 3.76078 | 0.843884          | 0.00005 | 0.00102476 |
| 398 | GATA6      | chr18:19749415-19782227       | PDT      | ATRA+PDT | 12.7737  | 16.4298 | 0.363143          | 0.00055 | 0.0085238  |
| 399 | GBP3       | chr1:89472359-89488549        | PDT      | ATRA+PDT | 5.81741  | 10.962  | 0.914066          | 0.00005 | 0.00102476 |
| 400 | GCNT2      | chr6:10521567-10629601        | PDT      | ATRA+PDT | 4.33216  | 5.83905 | 0.430648          | 0.00035 | 0.00584867 |
| 401 | GDF15      | chr19:18496967-18499986       | PDT      | ATRA+PDT | 395.98   | 673.908 | 0.767123          | 0.00005 | 0.00102476 |
| 402 | GFOD1      | chr6:13363586-13487869        | PDT      | ATRA+PDT | 4.02601  | 2.65386 | -0.601256         | 0.00035 | 0.00584867 |
| 403 | GJB2       | chr13:20761603-20767114       | PDT      | ATRA+PDT | 13.3763  | 10.3672 | -0.367655         | 0.0019  | 0.0221245  |
| 404 | GLB1L2     | chr11:134201767-134246218     | PDT      | ATRA+PDT | 40.5745  | 33.0921 | -0.294089         | 0.      |            |

Table S1: Significant differentially expressed genes (DEGs) after ATRA+PDT compared to PDT.

| #   | gene      | locus                         | sample_1 | sample_2 | value_1  | value_2  | log2(fold_change) | p_value | q_value    |
|-----|-----------|-------------------------------|----------|----------|----------|----------|-------------------|---------|------------|
| 409 | GLIS3     | chr9:3824127-4300035          | PDT      | ATRA+PDT | 2.9426   | 4.17559  | 0.50489           | 0.00005 | 0.00102476 |
| 410 | GLTPD1    | chr1:1260142-1264276          | PDT      | ATRA+PDT | 6.41022  | 4.68666  | -0.451815         | 0.0008  | 0.0114972  |
| 411 | GMEB2     | chr20:62218954-62258381       | PDT      | ATRA+PDT | 17.8984  | 22.2288  | 0.3126            | 0.00245 | 0.0267496  |
| 412 | GNA14     | chr9:80037994-80263232        | PDT      | ATRA+PDT | 1.83269  | 1.07864  | -0.764748         | 0.0013  | 0.0166643  |
| 413 | GNAI1     | chr7:79764139-79848725        | PDT      | ATRA+PDT | 18.3225  | 14.5946  | -0.328176         | 0.00165 | 0.0198632  |
| 414 | GNAZ      | chr22:23401592-23484241       | PDT      | ATRA+PDT | 1.1314   | 0.568899 | -0.991869         | 0.00085 | 0.0119898  |
| 415 | GNE       | chr9:36214438-36277053        | PDT      | ATRA+PDT | 7.61007  | 5.82517  | -0.385611         | 0.0004  | 0.00650107 |
| 416 | GNPAT     | chr1:231359508-231413719      | PDT      | ATRA+PDT | 22.1603  | 31.3272  | 0.499438          | 0.00005 | 0.00102476 |
| 417 | GOLGA8A   | chr15:34671269-34729667       | PDT      | ATRA+PDT | 5.68254  | 4.37806  | -0.376245         | 0.00225 | 0.0252369  |
| 418 | GOLPH3L   | chr1:150618700-150669672      | PDT      | ATRA+PDT | 19.8668  | 28.0126  | 0.495718          | 0.00005 | 0.00102476 |
| 419 | GOLT1A    | chr1:204167287-204183220      | PDT      | ATRA+PDT | 7.49469  | 11.4978  | 0.61742           | 0.0003  | 0.00511725 |
| 420 | GPC4      | chrX:132435063-132549205      | PDT      | ATRA+PDT | 2.61393  | 3.85772  | 0.561528          | 0.00005 | 0.00102476 |
| 421 | GPCPD1    | chr20:5525079-5591672         | PDT      | ATRA+PDT | 2.764    | 3.95326  | 0.516285          | 0.00005 | 0.00102476 |
| 422 | GPD1      | chr12:50497800-50505095       | PDT      | ATRA+PDT | 2.28955  | 1.01978  | -1.1668           | 0.00005 | 0.00102476 |
| 423 | GPR110    | chr6:46967812-47010082        | PDT      | ATRA+PDT | 31.3419  | 51.5418  | 0.717651          | 0.00005 | 0.00102476 |
| 424 | GPR114    | chr16:57576600-57611100       | PDT      | ATRA+PDT | 3.23369  | 2.00971  | -0.686193         | 0.00005 | 0.00102476 |
| 425 | GPR158    | chr10:25447000-25891157       | PDT      | ATRA+PDT | 0.87409  | 1.31409  | 0.588213          | 0.00025 | 0.00439786 |
| 426 | GPR160    | chr3:169755734-169803183      | PDT      | ATRA+PDT | 7.7991   | 10.3693  | 0.410936          | 0.0013  | 0.0166643  |
| 427 | GPR35     | chr2:241544824-241570676      | PDT      | ATRA+PDT | 25.9273  | 20.6714  | -0.326836         | 0.002   | 0.0229388  |
| 428 | GPR87     | chr3:150804675-151176497      | PDT      | ATRA+PDT | 4.55177  | 8.63195  | 0.92326           | 0.00005 | 0.00102476 |
| 429 | GPRC5A    | chr12:13043955-13066600       | PDT      | ATRA+PDT | 195.824  | 291.91   | 0.575964          | 0.00005 | 0.00102476 |
| 430 | GRB7      | chr17:37894161-37903538       | PDT      | ATRA+PDT | 26.9977  | 40.8461  | 0.597359          | 0.00005 | 0.00102476 |
| 431 | GRHL3     | chr1:24645811-24741587        | PDT      | ATRA+PDT | 1.75026  | 0.776258 | -1.17296          | 0.002   | 0.0229388  |
| 432 | GRIN2D    | chr19:48898131-48948188       | PDT      | ATRA+PDT | 3.05194  | 5.32452  | 0.802924          | 0.00005 | 0.00102476 |
| 433 | GRK5      | chr10:120967196-121215131     | PDT      | ATRA+PDT | 5.1872   | 3.94614  | -0.394514         | 0.00235 | 0.0259765  |
| 434 | GSDMB     | chr17:38060847-38074903       | PDT      | ATRA+PDT | 2.28629  | 3.67046  | 0.682951          | 0.00165 | 0.0198632  |
| 435 | GSDMD     | chr8:144635556-144645231      | PDT      | ATRA+PDT | 7.49063  | 11.6451  | 0.636561          | 0.00005 | 0.00102476 |
| 436 | GSN       | chr9:124030379-124095120      | PDT      | ATRA+PDT | 41.6084  | 30.6138  | -0.442694         | 0.00005 | 0.00102476 |
| 437 | GSTA4     | chr6:52842745-52860178        | PDT      | ATRA+PDT | 7.19953  | 4.1013   | -0.811822         | 0.00005 | 0.00102476 |
| 438 | GTPBP2    | chr6:43543877-43596936        | PDT      | ATRA+PDT | 48.7001  | 66.9444  | 0.459038          | 0.00005 | 0.00102476 |
| 439 | GUK1      | chr1:228327784-228336655      | PDT      | ATRA+PDT | 92.4045  | 73.8656  | -0.32306          | 0.00165 | 0.0198632  |
| 440 | GYG1      | chr3:148709194-148745456      | PDT      | ATRA+PDT | 27.1253  | 21.9331  | -0.306532         | 0.0038  | 0.0386074  |
| 441 | H1FO      | chr22:38201113-38203443       | PDT      | ATRA+PDT | 89.3849  | 124.932  | 0.483036          | 0.00005 | 0.00102476 |
| 442 | H1FX      | chr3:129033613-129043412      | PDT      | ATRA+PDT | 45.3794  | 59.1282  | 0.38181           | 0.00025 | 0.00439786 |
| 443 | HAGHL     | chr16:777265-779715           | PDT      | ATRA+PDT | 4.11839  | 2.28962  | -0.846973         | 0.00045 | 0.00719326 |
| 444 | HBEGF     | chr5:139712427-139726188      | PDT      | ATRA+PDT | 20.527   | 41.5863  | 1.01859           | 0.00005 | 0.00102476 |
| 445 | HCAR1     | chr12:123212152-123215129     | PDT      | ATRA+PDT | 5.34507  | 7.07409  | 0.404334          | 0.0014  | 0.0175049  |
| 446 | HDAC9     | chr7:18126571-19036992        | PDT      | ATRA+PDT | 1.44155  | 3.20797  | 1.15404           | 0.00005 | 0.00102476 |
| 447 | HEPH      | chrX:65382432-65487230        | PDT      | ATRA+PDT | 3.62214  | 1.79148  | -1.01569          | 0.00005 | 0.00102476 |
| 448 | HERC6     | chr4:89299890-89364249        | PDT      | ATRA+PDT | 0.683215 | 1.25848  | 0.881267          | 0.00015 | 0.00281494 |
| 449 | HES6      | chr2:239146907-239148681      | PDT      | ATRA+PDT | 5.73401  | 2.55042  | -1.16881          | 0.00005 | 0.00102476 |
| 450 | HGD       | chr3:120347014-120401418      | PDT      | ATRA+PDT | 10.2884  | 5.52027  | -0.898213         | 0.00005 | 0.00102476 |
| 451 | HLA2      | chr3:108021331-108097126      | PDT      | ATRA+PDT | 4.62643  | 1.14286  | 0.36638           | 0.00005 | 0.00102476 |
| 452 | HIPK2     | chr7:139246315-139477693      | PDT      | ATRA+PDT | 5.89243  | 7.59602  | 0.36638           | 0.0003  | 0.00511725 |
| 453 | HIST1H2BN | chr6:27806439-27806888        | PDT      | ATRA+PDT | 1.30759  |          | 0 -inf            | 0.00145 | 0.0179618  |
| 454 | HIVEP2    | chr6:143072603-143266338      | PDT      | ATRA+PDT | 6.94549  | 9.85117  | 0.504219          | 0.00005 | 0.00102476 |
| 455 | HJURP     | chr2:234745485-234763212      | PDT      | ATRA+PDT | 19.6228  | 15.0074  | -0.386854         | 0.00025 | 0.00439786 |
| 456 | HK1       | chr10:71029755-71161637       | PDT      | ATRA+PDT | 39.6626  | 31.8751  | -0.315349         | 0.001   | 0.0135165  |
| 457 | HLA-B     | chr6_ssto_hap7:2655407-265874 | PDT      | ATRA+PDT | 2.29347  | 4.53191  | 0.98259           | 0.00005 | 0.00102476 |
| 458 | HLA-C     | chr6_ssto_hap7:2570004-257338 | PDT      | ATRA+PDT | 28.2747  | 48.785   | 0.786925          | 0.00005 | 0.00102476 |
| 459 | HLA-E     | chr6_ssto_hap7:1789472-179427 | PDT      | ATRA+PDT | 30.4013  | 38.3495  | 0.335076          | 0.00095 | 0.0131061  |
| 460 | HLA-J     | chr6_ssto_hap7:1298114-135940 | PDT      | ATRA+PDT | 1.6197   | 2.77771  | 0.778169          | 0.00445 | 0.0435537  |
| 461 | HMG2      | chr12:66151800-66360071       | PDT      | ATRA+PDT | 6.8733   | 4.23936  | -0.697159         | 0.00005 | 0.00102476 |
| 462 | HMGCR     | chr5:74632992-74657926        | PDT      | ATRA+PDT | 86.0972  | 66.7796  | -0.366559         | 0.00035 | 0.00584867 |
| 463 | HMGCS2    | chr1:120290618-120311555      | PDT      | ATRA+PDT | 16.1869  | 0.803481 | -4.33242          | 0.00005 | 0.00102476 |
| 464 | HNF4A     | chr20:42984440-43060030       | PDT      | ATRA+PDT | 16.8354  | 9.53061  | -0.820854         | 0.00005 | 0.00102476 |
| 465 | HNF4G     | chr8:76452202-76479061        | PDT      | ATRA+PDT | 13.4329  | 19.4032  | 0.530523          | 0.00005 | 0.00102476 |
| 466 | HOXA3     | chr7:27145808-27166639        | PDT      | ATRA+PDT | 2.22132  | 3.42141  | 0.623174          | 0.00005 | 0.00102476 |
| 467 | HOXA5     | chr7:27179982-27196296        | PDT      | ATRA+PDT | 9.4125   | 12.6717  | 0.428962          | 0.00405 | 0.0405304  |
| 468 | HPDL      | chr1:45792544-45794346        | PDT      | ATRA+PDT | 7.45459  | 5.14936  | -0.533734         | 0.00005 | 0.00102476 |
| 469 | HPGD      | chr4:175411327-175444049      | PDT      | ATRA+PDT | 10.8983  | 5.70085  | -0.934858         | 0.00005 | 0.00102476 |
| 470 | HRH1      | chr3:11178778-11304939        | PDT      | ATRA+PDT | 5.2823   | 8.67514  | 0.71572           | 0.00005 | 0.00102476 |
| 471 | HSPA1A    | chr6_qbl_hap6:3076937-307936  | PDT      | ATRA+PDT | 612.758  | 897.988  | 0.551379          | 0.00005 | 0.00102476 |
| 472 | HSPA1B    | chr6_qbl_hap6:3089162-309168  | PDT      | ATRA+PDT | 745.494  | 1083.52  | 0.539457          | 0.00005 | 0.00102476 |
| 473 | HSPA1L    | chr6_qbl_hap6:3071043-307648  | PDT      | ATRA+PDT | 2.68991  | 3.82212  | 0.506814          | 0.00095 | 0.0131061  |
| 474 | HSPA4L    | chr4:128703452-128754526      | PDT      | ATRA+PDT | 45.3591  | 59.7923  | 0.398568          | 0.00005 | 0.00102476 |
| 475 | HSPA6     | chr1:161494035-161496687      | PDT      | ATRA+PDT | 159.467  | 281.821  | 0.821519          | 0.00005 | 0.00102476 |
| 476 | HSPA7     | chr1:161575848-161578341      | PDT      | ATRA+PDT | 3.44082  | 6.33443  | 0.880463          | 0.00005 | 0.00102476 |
| 477 | HSPB1     | chr7:75931874-75933614        | PDT      | ATRA+PDT | 102.047  | 199.387  | 0.96634           | 0.00005 | 0.00102476 |
| 478 | HSPG2     | chr1:22138757-22263750        | PDT      | ATRA+PDT | 13.7059  | 21.6875  | 0.66207           | 0.00005 | 0.00102476 |
| 479 | HSPH1     | chr13:31710762-31736117       | PDT      | ATRA+PDT | 462.619  | 655.509  | 0.50279           | 0.00005 | 0.00102476 |
| 480 | HTR1D     | chr1:23518387-23521222        | PDT      | ATRA+PDT | 2.95125  | 1.97948  | -0.576204         | 0.0004  | 0.00650107 |
| 481 | ID2       | chr2:8822112-8824583          | PDT      | ATRA+PDT | 5.50856  | 2.75203  | -1.00118          | 0.00005 | 0.00102476 |
| 482 | ID1       | chr10:1064846-1095061         | PDT      | ATRA+PDT | 129.123  | 102.959  | -0.326683         | 0.00055 | 0.0085238  |
| 483 | IER5L     | chr9:131937830-131940540      | PDT      | ATRA+PDT | 1.89291  | 2.85555  | 0.593163          | 0.0008  | 0.0114972  |
| 484 | IFFO2     | chr1:19230773-19282826        | PDT      | ATRA+PDT | 55.4573  | 77.6592  | 0.485779          | 0.00005 | 0.00102476 |
| 485 | IFI35     | chr17:41158741-41166476       | PDT      | ATRA+PDT | 3.36478  | 6.42601  | 0.933414          | 0.00005 | 0.00102476 |
| 486 | IFI44     | chr1:79115476-79129763        | PDT      | ATRA+PDT | 1.76976  | 3.04735  | 0.783999          | 0.00055 | 0.0085238  |
| 487 | IFIH1     | chr2:163123588-163175039      | PDT      | ATRA+PDT | 1.31458  | 1.92628  | 0.551214          | 0.0023  | 0.0255827  |
| 488 | IFIT3     | chr10:91087601-91100725       | PDT      | ATRA+PDT | 3.12177  | 4.27384  | 0.453168          | 0.00175 | 0.0207397  |
| 489 | IFITM2    | chr11:308106-309410           | PDT      | ATRA+PDT | 16.2241  | 28.8464  | 0.830253          | 0.00005 | 0.00102476 |
| 490 | IFITM3    | chr11:319672-320914           | PDT      | ATRA+PDT | 3.17628  | 9.52404  | 1.58423           | 0.00005 | 0.00102476 |
| 491 | IFNGR2    | chr21:34775201-34852316       | PDT      | ATRA+PDT | 14.2102  | 18.7851  | 0.402665          | 0.00165 | 0.0198632  |
| 492 | IGF2      | chr11:2150341-2182439         | PDT      | ATRA+PDT | 6.58505  | 4.4414   | -0.568179         | 0.0004  | 0.00650107 |
| 493 | IGFBP2    | chr2:217498126-217529158      | PDT      | ATRA+PDT | 9.34685  | 6.63453  | -0.494486         | 0.0005  | 0.00788626 |
| 494 | IGFBP6    | chr12:53491435-53496128       | PDT      | ATRA+PDT | 31.6079  | 110.977  | 1.81191           | 0.00005 | 0.00102476 |
| 495 | IGSF1     | chrX:130407482-130423403      | PDT      | ATRA+PDT | 3.04443  | 1.18424  | -1.36221          | 0.00005 | 0.00102476 |
| 496 | IGSF9     | chr1:159896828-159915386      | PDT      | ATRA+PDT | 3.79281  | 2.55118  | -0.572102         | 0.00005 | 0.00102476 |
| 497 | IL15RA    | chr10:5994333-6020150         | PDT      | ATRA+PDT | 1.29552  | 3.53252  | 1.44716           | 0.00005 | 0.00102476 |
| 498 | IL1R2     | chr2:102608305-102644884      | PDT      | ATRA+PDT | 6.14538  | 4.29709  | -0.516143         | 0.0019  | 0.0221245  |
| 499 | IL1RN     | chr2:113875469-113891593      | PDT      | ATRA+PDT | 13.7209  | 19.7421  | 0.524894          | 0.00005 | 0.00102476 |
| 500 | IL8       | chr4:74606222-74609433        | PDT      | ATRA+PDT | 14.3248  | 29.5956  | 1.04686           | 0.00005 | 0.00102476 |
| 501 | IMPDH1    | chr7:128032330-128050036      | PDT      | ATRA+PDT | 58.24    | 47.5302  | -0.293165         | 0.0032  | 0.0337978  |
| 502 | INCENP    | chr11:61891444-61920635       | PDT      | ATRA+PDT | 17.7265  | 14.0139  | -0.339053         | 0.00125 | 0.0161202  |
| 503 | INPPL1    | chr11:71935881-71955220       | PDT      | ATRA+PDT | 7.33072  | 9.52766  | 0.378168          | 0.0006  | 0.00910057 |
| 504 | INSIG1    | chr7:155089485-155101945      | PDT      | ATRA+PDT | 92.3001  | 69.1934  | -0.415699         | 0.00005 | 0.00102476 |
| 505 | INTU      | chr4:128554086-128637934      | PDT      | ATRA+PDT | 1.52329  | 2.25255  | 0.564362          | 0.00135 | 0.0171     |
| 506 | IQGAP2    | chr5:75699148-76003957        | PDT      | ATRA+PDT | 6.99109  | 5.53759  | -0.336261         | 0.00185 | 0.0217319  |
| 50  |           |                               |          |          |          |          |                   |         |            |

Table S1: Significant differentially expressed genes (DEGs) after ATRA+PDT compared to PDT.

| #   | gene         | locus                     | sample_1 | sample_2 | value_1  | value_2  | log2(fold_change) | p_value | q_value    |
|-----|--------------|---------------------------|----------|----------|----------|----------|-------------------|---------|------------|
| 511 | ITM2B        | chr13:48807273-48836232   | PDT      | ATRA+PDT | 45.3908  | 56.6793  | 0.320422          | 0.0016  | 0.0194588  |
| 512 | ITPKA        | chr15:41786055-41795757   | PDT      | ATRA+PDT | 0.556708 | 1.31432  | 1.23932           | 0.00425 | 0.0420979  |
| 513 | ITPR2        | chr12:26488284-26986131   | PDT      | ATRA+PDT | 2.36664  | 1.77543  | -0.414676         | 0.00045 | 0.00719326 |
| 514 | ITPRIP       | chr10:106071898-106093663 | PDT      | ATRA+PDT | 3.14414  | 4.07388  | 0.373739          | 0.004   | 0.0401429  |
| 515 | JAG2         | chr14:105608075-105635161 | PDT      | ATRA+PDT | 3.13358  | 2.14484  | -0.546942         | 0.00005 | 0.00102476 |
| 516 | JDP2         | chr14:75894508-75939404   | PDT      | ATRA+PDT | 2.75811  | 4.48053  | 0.699991          | 0.00005 | 0.00102476 |
| 517 | JMJD1C       | chr10:64926987-65226322   | PDT      | ATRA+PDT | 28.1971  | 38.0703  | 0.433119          | 0.00005 | 0.00102476 |
| 518 | JMJD5        | chr16:27214806-27233089   | PDT      | ATRA+PDT | 1.04725  | 1.86261  | 0.830721          | 0.0008  | 0.0114972  |
| 519 | JUN          | chr1:59246462-59249785    | PDT      | ATRA+PDT | 62.6204  | 87.3252  | 0.479765          | 0.00005 | 0.00102476 |
| 520 | JUND         | chr19:18390562-18392432   | PDT      | ATRA+PDT | 50.5425  | 72.2088  | 0.514676          | 0.00005 | 0.00102476 |
| 521 | KANK1        | chr9:504702-746103        | PDT      | ATRA+PDT | 4.76117  | 6.11556  | 0.361169          | 0.00265 | 0.0286404  |
| 522 | KANSL3       | chr2:97258906-97304115    | PDT      | ATRA+PDT | 17.7835  | 22.5732  | 0.344067          | 0.0005  | 0.00788626 |
| 523 | KCNE3        | chr11:74165885-74178600   | PDT      | ATRA+PDT | 3.59091  | 7.78606  | 1.11655           | 0.00005 | 0.00102476 |
| 524 | KCNK5        | chr6:39156746-39197251    | PDT      | ATRA+PDT | 10.4488  | 7.78294  | -0.424949         | 0.0002  | 0.00358322 |
| 525 | KDM2B        | chr12:121866899-122018920 | PDT      | ATRA+PDT | 6.14892  | 4.89176  | -0.329979         | 0.00325 | 0.0342581  |
| 526 | KDM6B        | chr17:7743234-7758118     | PDT      | ATRA+PDT | 8.33288  | 10.5209  | 0.336372          | 0.00095 | 0.0131061  |
| 527 | KIAA0040     | chr1:175126122-175162229  | PDT      | ATRA+PDT | 9.05332  | 11.1212  | 0.296789          | 0.00515 | 0.0488381  |
| 528 | KIAA0182     | chr16:85645028-85709812   | PDT      | ATRA+PDT | 25.1433  | 31.1985  | 0.311303          | 0.0018  | 0.0212615  |
| 529 | KIAA0430     | chr16:15688225-15737023   | PDT      | ATRA+PDT | 6.13795  | 7.74811  | 0.336087          | 0.001   | 0.0135165  |
| 530 | KIAA0664L3   | chr16:31711933-31718745   | PDT      | ATRA+PDT | 1.59993  | 2.86062  | 0.838318          | 0.0007  | 0.0103814  |
| 531 | KIAA0907     | chr1:155882835-155904188  | PDT      | ATRA+PDT | 14.384   | 10.9516  | -0.393324         | 0.00055 | 0.0085238  |
| 532 | KIAA1109     | chr4:123091757-123283914  | PDT      | ATRA+PDT | 6.77937  | 8.55588  | 0.335765          | 0.00075 | 0.0109256  |
| 533 | KIAA1161     | chr9:34368906-34376894    | PDT      | ATRA+PDT | 13.347   | 9.93011  | -0.426637         | 0.00005 | 0.00102476 |
| 534 | KIAA1199     | chr15:81071711-81243999   | PDT      | ATRA+PDT | 18.2246  | 26.0793  | 0.517021          | 0.00005 | 0.00102476 |
| 535 | KIAA1211     | chr4:57036360-57196890    | PDT      | ATRA+PDT | 2.71753  | 1.96603  | -0.467014         | 0.00025 | 0.00439786 |
| 536 | KIAA1244     | chr6:138483052-138665800  | PDT      | ATRA+PDT | 4.25439  | 5.27576  | 0.310426          | 0.0027  | 0.0291218  |
| 537 | KIAA1462     | chr10:30301728-30348488   | PDT      | ATRA+PDT | 2.75442  | 2.14844  | -0.358459         | 0.0027  | 0.0291218  |
| 538 | KIF13B       | chr8:28924794-29120610    | PDT      | ATRA+PDT | 3.97397  | 4.9588   | 0.319411          | 0.0035  | 0.0363197  |
| 539 | KITLG        | chr12:88886569-88974250   | PDT      | ATRA+PDT | 62.7278  | 48.1623  | -0.381202         | 0.0002  | 0.00358322 |
| 540 | KLF12        | chr13:74260148-74708066   | PDT      | ATRA+PDT | 4.1927   | 5.99807  | 0.516618          | 0.00005 | 0.00102476 |
| 541 | KLF4         | chr9:110247132-110252047  | PDT      | ATRA+PDT | 20.167   | 15.3591  | -0.392903         | 0.00035 | 0.00584867 |
| 542 | KLF6         | chr10:3818187-3827473     | PDT      | ATRA+PDT | 116.265  | 182.985  | 0.65431           | 0.00005 | 0.00102476 |
| 543 | KLF9         | chr9:72999512-73029573    | PDT      | ATRA+PDT | 1.03209  | 1.46042  | 0.500816          | 0.0024  | 0.0263926  |
| 544 | KLHL24       | chr3:183353410-183402304  | PDT      | ATRA+PDT | 9.81722  | 12.0617  | 0.297047          | 0.0038  | 0.0386074  |
| 545 | KLHL25       | chr15:86302558-86338189   | PDT      | ATRA+PDT | 5.03188  | 6.50075  | 0.369509          | 0.0031  | 0.0328065  |
| 546 | KLHL5        | chr4:39046450-39127853    | PDT      | ATRA+PDT | 2.10193  | 3.84225  | 0.870241          | 0.00005 | 0.00102476 |
| 547 | KLK10        | chr19:51515999-51523431   | PDT      | ATRA+PDT | 52.0493  | 83.349   | 0.679285          | 0.00005 | 0.00102476 |
| 548 | KLK12        | chr19:51532347-51538148   | PDT      | ATRA+PDT | 2.7591   | 0 -inf   |                   | 0.00005 | 0.00102476 |
| 549 | KLK6         | chr19:51461886-51472929   | PDT      | ATRA+PDT | 250.781  | 468.7    | 0.902237          | 0.00005 | 0.00102476 |
| 550 | KRT13        | chr17:39657232-39661865   | PDT      | ATRA+PDT | 10.4704  | 14.8408  | 0.503253          | 0.0002  | 0.00358322 |
| 551 | KRT20        | chr17:39032140-39041495   | PDT      | ATRA+PDT | 285.041  | 226.863  | -0.329347         | 0.00115 | 0.0151042  |
| 552 | KRT7         | chr12:52626953-52642709   | PDT      | ATRA+PDT | 2.09329  | 3.50519  | 0.743723          | 0.0006  | 0.00910057 |
| 553 | KRT80        | chr12:52562779-52585784   | PDT      | ATRA+PDT | 37.3471  | 58.4232  | 0.645543          | 0.00005 | 0.00102476 |
| 554 | LAMA5        | chr20:60884120-60942368   | PDT      | ATRA+PDT | 13.9332  | 16.9153  | 0.279795          | 0.0043  | 0.0424749  |
| 555 | LAMC2        | chr1:183155173-183214262  | PDT      | ATRA+PDT | 11.3733  | 14.2343  | 0.323717          | 0.0011  | 0.0146092  |
| 556 | LAT2         | chr7:73624086-73644164    | PDT      | ATRA+PDT | 2.73752  | 1.68019  | -0.704247         | 0.0008  | 0.0114972  |
| 557 | LATS2        | chr13:21547175-21635722   | PDT      | ATRA+PDT | 7.21982  | 9.1952   | 0.348918          | 0.0011  | 0.0146092  |
| 558 | LCN2         | chr9:130911731-130915734  | PDT      | ATRA+PDT | 67.9208  | 229.774  | 1.75829           | 0.00005 | 0.00102476 |
| 559 | LDHA         | chr11:18415935-18429765   | PDT      | ATRA+PDT | 520.471  | 387.074  | -0.427208         | 0.00005 | 0.00102476 |
| 560 | LEPREL1      | chr3:189674516-189840226  | PDT      | ATRA+PDT | 3.14966  | 0.868411 | -1.85875          | 0.00005 | 0.00102476 |
| 561 | LEPREL4      | chr17:39958204-39968451   | PDT      | ATRA+PDT | 5.03458  | 3.84597  | -0.388524         | 0.0035  | 0.0363197  |
| 562 | LGALS3       | chr14:55595934-55612148   | PDT      | ATRA+PDT | 93.1758  | 66.449   | -0.487708         | 0.00005 | 0.00102476 |
| 563 | LGALS3BP     | chr17:76967334-76976061   | PDT      | ATRA+PDT | 169.931  | 209.535  | 0.302242          | 0.0023  | 0.0255827  |
| 564 | LGALS4       | chr19:39292310-39303740   | PDT      | ATRA+PDT | 473.603  | 343.759  | -0.46228          | 0.00005 | 0.00102476 |
| 565 | LGALS9       | chr17:25958173-25976586   | PDT      | ATRA+PDT | 8.81966  | 19.451   | 1.14105           | 0.00005 | 0.00102476 |
| 566 | LGMN         | chr14:93170151-93215047   | PDT      | ATRA+PDT | 27.1521  | 41.8574  | 0.624417          | 0.00005 | 0.00102476 |
| 567 | LGR4         | chr11:27387507-27494334   | PDT      | ATRA+PDT | 36.4515  | 29.9764  | -0.282149         | 0.00385 | 0.0390041  |
| 568 | LIF          | chr22:30636441-30642796   | PDT      | ATRA+PDT | 6.03009  | 9.60605  | 0.671763          | 0.00005 | 0.00102476 |
| 569 | LIMA1        | chr12:50569562-50677353   | PDT      | ATRA+PDT | 71.8704  | 98.5638  | 0.45566           | 0.00005 | 0.00102476 |
| 570 | LIMS2        | chr2:128395995-128439360  | PDT      | ATRA+PDT | 17.001   | 10.3959  | -0.709613         | 0.00005 | 0.00102476 |
| 571 | LINC00263    | chr10:102133332-102148111 | PDT      | ATRA+PDT | 9.00983  | 12.3297  | 0.452564          | 0.0023  | 0.0255827  |
| 572 | LINC00346    | chr13:111516333-111522655 | PDT      | ATRA+PDT | 1.45147  | 2.37626  | 0.711183          | 0.00005 | 0.00102476 |
| 573 | LIPG         | chr18:47088426-47119278   | PDT      | ATRA+PDT | 29.3519  | 41.6539  | 0.504996          | 0.00005 | 0.00102476 |
| 574 | LMO7         | chr13:76194569-76434006   | PDT      | ATRA+PDT | 63.2636  | 78.1874  | 0.305562          | 0.0023  | 0.0255827  |
| 575 | LOC100289255 | chr17:10698229-10707416   | PDT      | ATRA+PDT | 8.25004  | 10.9374  | 0.406794          | 0.0017  | 0.0202822  |
| 576 | LOC100499177 | chr4:83814604-83841284    | PDT      | ATRA+PDT | 52.2529  | 65.9451  | 0.335755          | 0.0008  | 0.0114972  |
| 577 | LOC100506548 | chr5:40825364-40829244    | PDT      | ATRA+PDT | 21.4239  | 26.6867  | 0.316904          | 0.00195 | 0.0225592  |
| 578 | LOC100859930 | chr5:180256953-180262726  | PDT      | ATRA+PDT | 5.83042  | 7.81612  | 0.422853          | 0.0035  | 0.0363197  |
| 579 | LOC146336    | chr16:1114081-1131454     | PDT      | ATRA+PDT | 3.05651  | 0.610603 | -2.32358          | 0.00005 | 0.00102476 |
| 580 | LOC388796    | chr20:37049238-37064018   | PDT      | ATRA+PDT | 52.6232  | 68.5071  | 0.380555          | 0.0005  | 0.00788626 |
| 581 | LOC400027    | chr12:46119502-46121704   | PDT      | ATRA+PDT | 2.69541  | 3.95591  | 0.553504          | 0.00105 | 0.0140676  |
| 582 | LOC439990    | chr10:81967465-81979413   | PDT      | ATRA+PDT | 2.51556  | 4.04375  | 0.684811          | 0.00005 | 0.00102476 |
| 583 | LOC541471    | chr2:112124590-112252692  | PDT      | ATRA+PDT | 10.7023  | 15.7466  | 0.557115          | 0.00395 | 0.0398659  |
| 584 | LOC550112    | chr4:68566995-68588222    | PDT      | ATRA+PDT | 1.86914  | 2.90238  | 0.63486           | 0.001   | 0.0135165  |
| 585 | LOC729966    | chr19:18360759-18366229   | PDT      | ATRA+PDT | 16.137   | 21.0502  | 0.383457          | 0.00525 | 0.0496541  |
| 586 | LOC730102    | chr1:177975274-178007142  | PDT      | ATRA+PDT | 4.1893   | 3.06842  | -0.449213         | 0.00075 | 0.0109256  |
| 587 | LOXL4        | chr10:100007442-100028007 | PDT      | ATRA+PDT | 1.62446  | 4.43023  | 1.44742           | 0.00005 | 0.00102476 |
| 588 | LPCAT1       | chr5:1461541-1524076      | PDT      | ATRA+PDT | 23.2019  | 16.2627  | -0.512683         | 0.00005 | 0.00102476 |
| 589 | LPP          | chr3:187868993-188608460  | PDT      | ATRA+PDT | 3.2364   | 4.52808  | 0.484508          | 0.00005 | 0.00102476 |
| 590 | LRIF1        | chr1:111489811-111506566  | PDT      | ATRA+PDT | 35.0027  | 44.2119  | 0.336968          | 0.00185 | 0.0217319  |
| 591 | LRI61        | chr3:66119284-66550845    | PDT      | ATRA+PDT | 5.95481  | 4.12301  | -0.530357         | 0.00055 | 0.0085238  |
| 592 | LRP8         | chr1:53692563-53793821    | PDT      | ATRA+PDT | 42.4996  | 30.5249  | -0.477462         | 0.00005 | 0.00102476 |
| 593 | LRRC31       | chr3:169557028-169587660  | PDT      | ATRA+PDT | 1.39178  | 0.656509 | -1.08404          | 0.0006  | 0.00910057 |
| 594 | LRRCC1       | chr8:86019322-86058314    | PDT      | ATRA+PDT | 3.93226  | 5.094    | 0.373438          | 0.004   | 0.0401429  |
| 595 | LRRK1        | chr15:101459459-101610317 | PDT      | ATRA+PDT | 8.13602  | 9.94322  | 0.289389          | 0.0038  | 0.0386074  |
| 596 | LSS          | chr21:47608359-47648738   | PDT      | ATRA+PDT | 15.5509  | 11.379   | -0.450621         | 0.00005 | 0.00102476 |
| 597 | LTBP3        | chr11:65292547-65325699   | PDT      | ATRA+PDT | 4.15846  | 7.24278  | 0.800493          | 0.00055 | 0.0085238  |
| 598 | LTBP4        | chr19:41099071-41135725   | PDT      | ATRA+PDT | 4.87091  | 3.07992  | -0.661299         | 0.00005 | 0.00102476 |
| 599 | LYSMD4       | chr15:100267611-100273626 | PDT      | ATRA+PDT | 3.71944  | 4.81908  | 0.373671          | 0.0039  | 0.0394358  |
| 600 | MACC1        | chr7:20174278-20257013    | PDT      | ATRA+PDT | 3.37263  | 4.86252  | 0.527829          | 0.00005 | 0.00102476 |
| 601 | MACF1        | chr1:39547088-39952810    | PDT      | ATRA+PDT | 8.65205  | 11.2662  | 0.380886          | 0.0006  | 0.00910057 |
| 602 | MACROD1      | chr11:63766029-63933585   | PDT      | ATRA+PDT | 12.4501  | 8.82427  | -0.496606         | 0.0003  | 0.00511725 |
| 603 | MAFF         | chr22:38597938-38612517   | PDT      | ATRA+PDT | 54.3501  | 77.4675  | 0.511308          | 0.00005 | 0.00102476 |
| 604 | MALAT1       | chr11:65265232-65273939   | PDT      | ATRA+PDT | 48.4011  | 35.4144  | -0.450706         | 0.00005 | 0.00102476 |
| 605 | MANSC1       | chr12:12482217-12503169   | PDT      | ATRA+PDT | 16.582   | 12.9391  | -0.357878         | 0.00175 | 0.0207397  |
| 606 | MAOA         | chrX:43515408-43606068    | PDT      | ATRA+PDT | 6.1329   | 4.33142  | -0.50173          | 0.00005 | 0.00102476 |
| 607 | MAOB         | chrX:43625856-43741721    | PDT      | ATRA+PDT | 2.99967  | 4.34618  | 0.534944          | 0.0002  | 0.00358322 |
| 608 | MAP1LC3B     | chr16:87425800-87438380   | PDT      |          |          |          |                   |         |            |

Table S1: Significant differentially expressed genes (DEGs) after ATRA+PDT compared to PDT.

| #   | gene     | locus                     | sample_1 | sample_2 | value_1  | value_2  | log2(fold_change) | p_value | q_value    |
|-----|----------|---------------------------|----------|----------|----------|----------|-------------------|---------|------------|
| 613 | MAT2A    | chr2:85766100-85788657    | PDT      | ATRA+PDT | 59.464   | 47.5279  | -0.323243         | 0.00245 | 0.0267496  |
| 614 | MB21D1   | chr6:74134855-74162043    | PDT      | ATRA+PDT | 29.1977  | 39.2172  | 0.425631          | 0.0001  | 0.00194145 |
| 615 | MBD6     | chr12:57916658-57923931   | PDT      | ATRA+PDT | 18.5689  | 22.9335  | 0.304567          | 0.0028  | 0.0301092  |
| 616 | MBOAT1   | chr6:20100934-20212670    | PDT      | ATRA+PDT | 1.39007  | 2.26188  | 0.702363          | 0.00005 | 0.00102476 |
| 617 | MBOAT7   | chr19:54677105-54693733   | PDT      | ATRA+PDT | 32.6092  | 40.3291  | 0.306542          | 0.0019  | 0.0221245  |
| 618 | MCAM     | chr11:119179233-119187840 | PDT      | ATRA+PDT | 4.99053  | 3.26224  | -0.613332         | 0.00005 | 0.00102476 |
| 619 | MCL1     | chr1:150547026-150552214  | PDT      | ATRA+PDT | 143.54   | 179.524  | 0.322729          | 0.0017  | 0.0202822  |
| 620 | MDK      | chr11:46402617-46405375   | PDT      | ATRA+PDT | 4.9587   | 26.8511  | 2.43695           | 0.00005 | 0.00102476 |
| 621 | ME1      | chr6:83920109-84140938    | PDT      | ATRA+PDT | 53.5323  | 44.352   | -0.271411         | 0.00445 | 0.0435537  |
| 622 | MED15    | chr22:20861885-20941919   | PDT      | ATRA+PDT | 45.8395  | 56.1238  | 0.292021          | 0.0034  | 0.0355585  |
| 623 | MEGF6    | chr1:3404505-3528059      | PDT      | ATRA+PDT | 0.819526 | 1.67993  | 1.03554           | 0.00005 | 0.00102476 |
| 624 | MEIS2    | chr15:37183221-37393500   | PDT      | ATRA+PDT | 7.09086  | 10.394   | 0.551714          | 0.00005 | 0.00102476 |
| 625 | METTL23  | chr17:74722911-74729962   | PDT      | ATRA+PDT | 31.6363  | 40.056   | 0.340438          | 0.00445 | 0.0435537  |
| 626 | METTL7B  | chr12:56075329-56106089   | PDT      | ATRA+PDT | 10.9456  | 5.80892  | -0.914008         | 0.00005 | 0.00102476 |
| 627 | MEX3A    | chr1:156041803-156051789  | PDT      | ATRA+PDT | 6.24003  | 8.4898   | 0.444176          | 0.00005 | 0.00102476 |
| 628 | MGAT1    | chr5:180217540-180237137  | PDT      | ATRA+PDT | 32.4596  | 24.78    | -0.38947          | 0.0003  | 0.00511725 |
| 629 | MGC45800 | chr4:183060158-183065668  | PDT      | ATRA+PDT | 1.85735  | 1.25974  | -0.560126         | 0.00045 | 0.00719326 |
| 630 | MIA3     | chr1:222791443-222841351  | PDT      | ATRA+PDT | 8.65341  | 10.5993  | 0.292628          | 0.0045  | 0.0439625  |
| 631 | MIB2     | chr1:1550794-1565990      | PDT      | ATRA+PDT | 1.57156  | 0.890457 | -0.819578         | 0.0005  | 0.00788626 |
| 632 | MICALL2  | chr7:1473994-1499109      | PDT      | ATRA+PDT | 9.61778  | 7.67023  | -0.326434         | 0.00475 | 0.045818   |
| 633 | MID1     | chrX:10413349-10851809    | PDT      | ATRA+PDT | 1.16894  | 1.93127  | 0.72435           | 0.00005 | 0.00102476 |
| 634 | MMP15    | chr16:58059281-58080804   | PDT      | ATRA+PDT | 10.7939  | 7.95429  | -0.440406         | 0.00005 | 0.00102476 |
| 635 | MMP7     | chr11:102391238-102401478 | PDT      | ATRA+PDT | 71.2114  | 148.966  | 1.0648            | 0.00005 | 0.00102476 |
| 636 | MMRN2    | chr10:88695297-88717425   | PDT      | ATRA+PDT | 2.00218  | 1.12145  | -0.836208         | 0.00005 | 0.00102476 |
| 637 | MOB3B    | chr9:27325206-27529850    | PDT      | ATRA+PDT | 4.24961  | 2.94053  | -0.531254         | 0.00005 | 0.00102476 |
| 638 | MPP6     | chr7:24613084-24727498    | PDT      | ATRA+PDT | 10.2552  | 7.66042  | -0.420862         | 0.00085 | 0.0119898  |
| 639 | MRPL18   | chr6:160211491-160219461  | PDT      | ATRA+PDT | 167.637  | 222.897  | 0.411037          | 0.00005 | 0.00102476 |
| 640 | MRPL2    | chr6:43021766-43027242    | PDT      | ATRA+PDT | 35.858   | 28.0635  | -0.353601         | 0.0014  | 0.0175049  |
| 641 | MRPL34   | chr19:17416476-17417652   | PDT      | ATRA+PDT | 8.90721  | 6.14515  | -0.535525         | 0.00155 | 0.0189586  |
| 642 | MRPL4    | chr19:10362639-10370736   | PDT      | ATRA+PDT | 34.4222  | 26.3991  | -0.382847         | 0.00075 | 0.0109256  |
| 643 | MRPS2    | chr9:138392482-138396519  | PDT      | ATRA+PDT | 63.5914  | 50.2259  | -0.3404           | 0.0009  | 0.0125788  |
| 644 | MRPS34   | chr16:1821895-1823140     | PDT      | ATRA+PDT | 61.5177  | 47.7933  | -0.364193         | 0.0009  | 0.0125788  |
| 645 | MSL3P1   | chr2:234774089-234777055  | PDT      | ATRA+PDT | 11.855   | 8.87928  | -0.416976         | 0.0009  | 0.0125788  |
| 646 | MSLN     | chr16:810764-818865       | PDT      | ATRA+PDT | 2.81002  | 1.28159  | -1.13265          | 0.00005 | 0.00102476 |
| 647 | MSMO1    | chr4:166248817-166264314  | PDT      | ATRA+PDT | 57.2861  | 42.5788  | -0.428049         | 0.00005 | 0.00102476 |
| 648 | MT1E     | chr16:56659584-56661024   | PDT      | ATRA+PDT | 599.264  | 810.957  | 0.436434          | 0.00005 | 0.00102476 |
| 649 | MT1X     | chr16:56716381-56718108   | PDT      | ATRA+PDT | 183.778  | 269.734  | 0.553572          | 0.00005 | 0.00102476 |
| 650 | MT2A     | chr16:56642477-56643409   | PDT      | ATRA+PDT | 727.536  | 1063.81  | 0.548144          | 0.00005 | 0.00102476 |
| 651 | MTMR11   | chr1:149900542-149908791  | PDT      | ATRA+PDT | 9.21467  | 7.00351  | -0.395854         | 0.00145 | 0.0179618  |
| 652 | MTSS1    | chr8:125563027-125740730  | PDT      | ATRA+PDT | 1.69547  | 5.32383  | 1.65078           | 0.00005 | 0.00102476 |
| 653 | MTUS1    | chr8:17501302-17658426    | PDT      | ATRA+PDT | 11.0399  | 7.61404  | -0.535987         | 0.00005 | 0.00102476 |
| 654 | MUC13    | chr3:124624288-124653595  | PDT      | ATRA+PDT | 28.9957  | 13.5277  | -1.09993          | 0.00005 | 0.00102476 |
| 655 | MUC2     | chr11:1074874-1104417     | PDT      | ATRA+PDT | 2.51755  | 1.38985  | -0.857089         | 0.00005 | 0.00102476 |
| 656 | MUC20    | chr3:195447752-195464540  | PDT      | ATRA+PDT | 2.92427  | 4.21721  | 0.528214          | 0.00005 | 0.00102476 |
| 657 | MXD1     | chr2:70142172-70170076    | PDT      | ATRA+PDT | 41.2028  | 57.6778  | 0.485271          | 0.00005 | 0.00102476 |
| 658 | MXD4     | chr4:2249159-2263739      | PDT      | ATRA+PDT | 4.39778  | 3.34473  | -0.394888         | 0.00165 | 0.0198632  |
| 659 | MYADM    | chr19:54369610-54379689   | PDT      | ATRA+PDT | 40.4218  | 57.1709  | 0.500148          | 0.00005 | 0.00102476 |
| 660 | MYB      | chr6:135502452-135540311  | PDT      | ATRA+PDT | 8.49932  | 10.5838  | 0.316437          | 0.00495 | 0.0474046  |
| 661 | MYEOV    | chr11:69061621-69064754   | PDT      | ATRA+PDT | 36.4184  | 58.2045  | 0.676462          | 0.00005 | 0.00102476 |
| 662 | MYO1B    | chr2:192110106-192290115  | PDT      | ATRA+PDT | 14.5609  | 20.5701  | 0.498451          | 0.00005 | 0.00102476 |
| 663 | MYOF     | chr10:95066185-95242074   | PDT      | ATRA+PDT | 26.7778  | 33.3691  | 0.317473          | 0.00125 | 0.0161202  |
| 664 | MYOM3    | chr1:24382530-24438665    | PDT      | ATRA+PDT | 5.16202  | 3.00742  | -0.77941          | 0.00005 | 0.00102476 |
| 665 | MYZAP    | chr15:57884101-58009755   | PDT      | ATRA+PDT | 9.78209  | 15.8685  | 0.697952          | 0.00125 | 0.0161202  |
| 666 | NAA16    | chr13:41885340-41951166   | PDT      | ATRA+PDT | 12.5809  | 16.0165  | 0.348331          | 0.00135 | 0.0171     |
| 667 | NAA20    | chr20:19997933-20014273   | PDT      | ATRA+PDT | 154.599  | 122.571  | -0.33491          | 0.00035 | 0.00584867 |
| 668 | NAAA     | chr4:76831807-76862166    | PDT      | ATRA+PDT | 3.09494  | 2.00349  | -0.627393         | 0.003   | 0.0318746  |
| 669 | NARFL    | chr16:779768-790997       | PDT      | ATRA+PDT | 7.36565  | 5.68953  | -0.372504         | 0.00365 | 0.0375479  |
| 670 | NCOA3    | chr20:46130600-46285621   | PDT      | ATRA+PDT | 9.3187   | 12.5625  | 0.430927          | 0.00005 | 0.00102476 |
| 671 | NCOA7    | chr6:126102306-126253176  | PDT      | ATRA+PDT | 7.94673  | 10.0077  | 0.332673          | 0.001   | 0.0135165  |
| 672 | NDRG2    | chr14:21484921-21493935   | PDT      | ATRA+PDT | 2.02451  | 1.04624  | -0.952352         | 0.0002  | 0.00358322 |
| 673 | NEDD4L   | chr18:55711609-56068772   | PDT      | ATRA+PDT | 15.5074  | 20.3359  | 0.391068          | 0.00005 | 0.00102476 |
| 674 | NEDD9    | chr6:11183530-11382581    | PDT      | ATRA+PDT | 13.5981  | 21.1826  | 0.639473          | 0.00005 | 0.00102476 |
| 675 | NELF     | chr9:140342022-140353786  | PDT      | ATRA+PDT | 21.2559  | 16.8792  | -0.332613         | 0.00085 | 0.0119898  |
| 676 | NEO1     | chr15:73344824-73597547   | PDT      | ATRA+PDT | 4.66325  | 6.55559  | 0.49139           | 0.00005 | 0.00102476 |
| 677 | NFKBIZ   | chr3:101498028-101579869  | PDT      | ATRA+PDT | 11.8167  | 16.851   | 0.512008          | 0.00005 | 0.00102476 |
| 678 | NFYA     | chr6:41040706-41108573    | PDT      | ATRA+PDT | 22.5346  | 27.3822  | 0.281099          | 0.0038  | 0.0386074  |
| 679 | NHS      | chrX:17393542-17754113    | PDT      | ATRA+PDT | 4.98575  | 7.55745  | 0.60009           | 0.00005 | 0.00102476 |
| 680 | NIPAL1   | chr4:48018790-48039080    | PDT      | ATRA+PDT | 12.6601  | 17.6904  | 0.482675          | 0.00005 | 0.00102476 |
| 681 | NME3     | chr16:1820320-1821710     | PDT      | ATRA+PDT | 8.76519  | 5.55801  | -0.657217         | 0.00055 | 0.0085238  |
| 682 | NME4     | chr16:447191-450754       | PDT      | ATRA+PDT | 8.29672  | 5.15854  | -0.685579         | 0.0001  | 0.00194145 |
| 683 | NMI      | chr2:152126981-152146430  | PDT      | ATRA+PDT | 14.5752  | 23.5218  | 0.690489          | 0.00005 | 0.00102476 |
| 684 | NMUR2    | chr5:151771101-151784840  | PDT      | ATRA+PDT | 38.8992  | 51.4381  | 0.403097          | 0.00005 | 0.00102476 |
| 685 | NOSTRIN  | chr2:169643048-169721849  | PDT      | ATRA+PDT | 4.83264  | 3.53551  | -0.450891         | 0.00255 | 0.0276998  |
| 686 | NOX1     | chrX:100098312-100129334  | PDT      | ATRA+PDT | 2.19042  | 1.46503  | -0.580285         | 0.00365 | 0.0375479  |
| 687 | NPAS2    | chr2:101436612-101613287  | PDT      | ATRA+PDT | 4.74617  | 6.4326   | 0.438638          | 0.00085 | 0.0119898  |
| 688 | NPC1     | chr18:21083461-21166581   | PDT      | ATRA+PDT | 30.5634  | 38.4756  | 0.332142          | 0.001   | 0.0135165  |
| 689 | NPDC1    | chr9:139933908-139940676  | PDT      | ATRA+PDT | 15.0162  | 8.51311  | -0.818761         | 0.00005 | 0.00102476 |
| 690 | NPNT     | chr4:106816596-106892828  | PDT      | ATRA+PDT | 25.931   | 19.6757  | -0.398259         | 0.00005 | 0.00102476 |
| 691 | NQO2     | chr6:3000066-3019994      | PDT      | ATRA+PDT | 19.8193  | 12.8652  | -0.623437         | 0.00005 | 0.00102476 |
| 692 | NR0B2    | chr1:27237974-27240567    | PDT      | ATRA+PDT | 1.38854  | 2.94617  | 1.08527           | 0.00055 | 0.0085238  |
| 693 | NR1D1    | chr17:38218445-38256973   | PDT      | ATRA+PDT | 15.3103  | 24.2233  | 0.661888          | 0.00005 | 0.00102476 |
| 694 | NR1D2    | chr3:23986750-24022109    | PDT      | ATRA+PDT | 25.6726  | 31.1112  | 0.277209          | 0.00475 | 0.045818   |
| 695 | NR5A2    | chr1:199996769-200146550  | PDT      | ATRA+PDT | 1.27497  | 2.3158   | 0.861049          | 0.00005 | 0.00102476 |
| 696 | NRIP1    | chr21:16333555-16437126   | PDT      | ATRA+PDT | 9.31825  | 11.6883  | 0.326936          | 0.0012  | 0.0156263  |
| 697 | NRP1     | chr10:33466418-33623833   | PDT      | ATRA+PDT | 4.46624  | 6.98659  | 0.645528          | 0.00015 | 0.00281494 |
| 698 | NRSN2    | chr20:327369-335512       | PDT      | ATRA+PDT | 2.17623  | 1.18721  | -0.874258         | 0.0003  | 0.00511725 |
| 699 | NT5E     | chr6:86159301-86205509    | PDT      | ATRA+PDT | 19.0717  | 13.5303  | -0.495233         | 0.00005 | 0.00102476 |
| 700 | NTN4     | chr12:96051582-96184536   | PDT      | ATRA+PDT | 35.7761  | 60.9329  | 0.768226          | 0.00005 | 0.00102476 |
| 701 | NUCB2    | chr11:17298285-17353070   | PDT      | ATRA+PDT | 10.6956  | 7.62311  | -0.488564         | 0.0001  | 0.00194145 |
| 702 | NUDC     | chr1:27248223-27272887    | PDT      | ATRA+PDT | 212.793  | 262.453  | 0.302609          | 0.0017  | 0.0202822  |
| 703 | NUDT19   | chr19:33182866-33204702   | PDT      | ATRA+PDT | 9.55354  | 6.97424  | -0.453999         | 0.00015 | 0.00281494 |
| 704 | OAS3     | chr12:113376248-113411054 | PDT      | ATRA+PDT | 4.98403  | 6.86002  | 0.460901          | 0.00005 | 0.00102476 |
| 705 | OBFC2A   | chr2:192542797-192553248  | PDT      | ATRA+PDT | 7.33341  | 10.0349  | 0.452475          | 0.00005 | 0.00102476 |
| 706 | ONECUT2  | chr18:55102916-55158530   | PDT      | ATRA+PDT | 5.40996  | 6.58805  | 0.284233          | 0.00415 | 0.041376   |
| 707 | OR7E14P  | chr11:17073432-17074591   | PDT      | ATRA+PDT | 6.80136  | 9.1838   | 0.433267          | 0.00385 | 0.0390041  |
| 708 | OSBPL5   | chr11:3108345-3186582     | PDT      | ATRA+PDT | 10.7194  | 7.38127  | -0.53829          | 0.00005 | 0.00102476 |
| 709 | OTUD7B   | chr1:149912231-149982686  | PDT      | ATRA+PDT | 5.74496  | 7.20416  | 0.326533          | 0.0022  | 0.024728   |
| 710 | OVOL1    | chr11:65554504-65564690   | PDT      | ATRA+PDT | 8.87289  | 11.53    | 0.377916          | 0.00075 | 0.0109256  |
| 711 | P        |                           |          |          |          |          |                   |         |            |

Table S1: Significant differentially expressed genes (DEGs) after ATRA+PDT compared to PDT.

| #   | gene     | locus                         | sample_1 | sample_2 | value_1  | value_2   | log2(fold_change) | p_value | q_value    |
|-----|----------|-------------------------------|----------|----------|----------|-----------|-------------------|---------|------------|
| 715 | PAQR5    | chr15:69591293-69699976       | PDT      | ATRA+PDT | 29.5384  | 20.7262   | -0.511137         | 0.00005 | 0.00102476 |
| 716 | PARD6B   | chr20:49348080-49370278       | PDT      | ATRA+PDT | 10.5288  | 13.243    | 0.330893          | 0.0016  | 0.0194588  |
| 717 | PARP10   | chr8:145051319-145060635      | PDT      | ATRA+PDT | 0.401217 | 1.33341   | 1.73267           | 0.00005 | 0.00102476 |
| 718 | PARP12   | chr7:139723548-139763521      | PDT      | ATRA+PDT | 4.93932  | 7.8736    | 0.672709          | 0.00005 | 0.00102476 |
| 719 | PARP14   | chr3:122399671-122449687      | PDT      | ATRA+PDT | 8.13795  | 15.8278   | 0.959724          | 0.00005 | 0.00102476 |
| 720 | PARP8    | chr5:49961732-50142356        | PDT      | ATRA+PDT | 1.65131  | 2.28313   | 0.467401          | 0.0002  | 0.00358322 |
| 721 | PATZ1    | chr22:31721789-31742249       | PDT      | ATRA+PDT | 6.64987  | 8.72047   | 0.391079          | 0.001   | 0.0135165  |
| 722 | PCK2     | chr14:24563482-24573339       | PDT      | ATRA+PDT | 15.5475  | 19.8844   | 0.354956          | 0.00145 | 0.0179618  |
| 723 | PCSK5    | chr9:78505559-78977255        | PDT      | ATRA+PDT | 7.01257  | 10.5902   | 0.59471           | 0.00005 | 0.00102476 |
| 724 | PCSK6    | chr15:101844132-102030187     | PDT      | ATRA+PDT | 17.9251  | 14.5859   | -0.297413         | 0.0046  | 0.0446535  |
| 725 | PDE12    | chr3:57541980-57547768        | PDT      | ATRA+PDT | 7.58494  | 5.83222   | -0.379092         | 0.00125 | 0.0161202  |
| 726 | PDE9A    | chr21:44073861-44195618       | PDT      | ATRA+PDT | 2.65823  | 4.41355   | 0.731474          | 0.0004  | 0.00650107 |
| 727 | PDIA5    | chr3:122785855-122880953      | PDT      | ATRA+PDT | 14.8652  | 11.5385   | -0.36549          | 0.0017  | 0.0202822  |
| 728 | PK4      | chr7:95212808-95225925        | PDT      | ATRA+PDT | 1.91366  | 2.81879   | 0.55874           | 0.00015 | 0.00281494 |
| 729 | PDLIM1   | chr10:96997329-97050781       | PDT      | ATRA+PDT | 72.8709  | 101.499   | 0.478051          | 0.00005 | 0.00102476 |
| 730 | PDLIM7   | chr5:176910394-176924602      | PDT      | ATRA+PDT | 11.7486  | 8.96007   | -0.390911         | 0.00415 | 0.041376   |
| 731 | PELI2    | chr14:56585092-56768031       | PDT      | ATRA+PDT | 1.87101  | 3.7817    | 1.01522           | 0.00005 | 0.00102476 |
| 732 | PEX11A   | chr15:90226286-90233958       | PDT      | ATRA+PDT | 11.7028  | 7.50754   | -0.640445         | 0.00005 | 0.00102476 |
| 733 | PFKM     | chr12:48499655-48540187       | PDT      | ATRA+PDT | 33.1889  | 26.1917   | -0.341586         | 0.0005  | 0.00788626 |
| 734 | PGM1     | chr1:64058946-64125916        | PDT      | ATRA+PDT | 8.02227  | 5.37656   | -0.577327         | 0.00005 | 0.00102476 |
| 735 | PGM2L1   | chr11:74041360-74109502       | PDT      | ATRA+PDT | 0.714012 | 1.42471   | 0.996651          | 0.00005 | 0.00102476 |
| 736 | PGPEP1   | chr19:18451407-18480763       | PDT      | ATRA+PDT | 2.68912  | 4.16227   | 0.630238          | 0.00005 | 0.00102476 |
| 737 | PHF21A   | chr11:45950869-46142985       | PDT      | ATRA+PDT | 1.81217  | 2.57575   | 0.507269          | 0.00005 | 0.00102476 |
| 738 | PHLDA1   | chr12:76419226-76425556       | PDT      | ATRA+PDT | 28.3072  | 49.6068   | 0.80937           | 0.00005 | 0.00102476 |
| 739 | PHLPP1   | chr18:60382671-60647676       | PDT      | ATRA+PDT | 3.19185  | 4.34827   | 0.446049          | 0.0001  | 0.00194145 |
| 740 | PI3      | chr20:43803539-43805185       | PDT      | ATRA+PDT | 11.7493  | 6.65439   | -0.82019          | 0.001   | 0.0135165  |
| 741 | PIK3R1   | chr5:67511583-67597649        | PDT      | ATRA+PDT | 17.1353  | 13.837    | -0.308442         | 0.0019  | 0.0221245  |
| 742 | PIM1     | chr6:37137921-37143204        | PDT      | ATRA+PDT | 11.4269  | 18.507    | 0.695638          | 0.00005 | 0.00102476 |
| 743 | PIP5K1A  | chr1:151171020-151222007      | PDT      | ATRA+PDT | 33.9012  | 42.7141   | 0.333379          | 0.00085 | 0.0119898  |
| 744 | PITPNC1  | chr17:65373923-65689647       | PDT      | ATRA+PDT | 31.2742  | 43.5841   | 0.478831          | 0.00005 | 0.00102476 |
| 745 | PITPNM3  | chr17:6354582-6459877         | PDT      | ATRA+PDT | 1.93026  | 1.34623   | -0.519863         | 0.00005 | 0.00102476 |
| 746 | PJA1     | chrX:68380580-68385365        | PDT      | ATRA+PDT | 3.37515  | 5.14484   | 0.608175          | 0.00005 | 0.00102476 |
| 747 | PKIB     | chr6:122793061-123047518      | PDT      | ATRA+PDT | 25.5099  | 12.9605   | -0.976938         | 0.00005 | 0.00102476 |
| 748 | PKN1     | chr19:14544165-14582679       | PDT      | ATRA+PDT | 8.80354  | 16.3822   | 0.895976          | 0.00005 | 0.00102476 |
| 749 | PKNOX1   | chr21:44394642-44453688       | PDT      | ATRA+PDT | 11.0656  | 13.5507   | 0.292295          | 0.0048  | 0.0461751  |
| 750 | PLA2G16  | chr11:63341943-63381941       | PDT      | ATRA+PDT | 137.417  | 169.418   | 0.302024          | 0.0024  | 0.0263926  |
| 751 | PLAC8    | chr4:84011210-84035911        | PDT      | ATRA+PDT | 2.40008  | 5.49895   | 1.19608           | 0.00005 | 0.00102476 |
| 752 | PLCXD1   | chrY:142990-170022            | PDT      | ATRA+PDT | 7.37322  | 4.9257    | -0.581968         | 0.00005 | 0.00102476 |
| 753 | PLD1     | chr3:171318194-171528284      | PDT      | ATRA+PDT | 1.88317  | 1.23716   | -0.606141         | 0.00005 | 0.00102476 |
| 754 | PLD2     | chr17:4710395-4726727         | PDT      | ATRA+PDT | 2.13226  | 3.16203   | 0.56847           | 0.0001  | 0.00194145 |
| 755 | PLEKHA2  | chr8:38758752-38831430        | PDT      | ATRA+PDT | 1.47715  | 2.04398   | 0.468562          | 0.00045 | 0.00719326 |
| 756 | PLEKHG5  | chr1:6521213-6580069          | PDT      | ATRA+PDT | 2.24091  | 1.63582   | -0.454065         | 0.0014  | 0.0175049  |
| 757 | PLK3     | chr1:45266035-45272957        | PDT      | ATRA+PDT | 12.6041  | 17.9976   | 0.513909          | 0.00005 | 0.00102476 |
| 758 | PLSCR1   | chr3:146232966-146262628      | PDT      | ATRA+PDT | 22.742   | 30.7511   | 0.435277          | 0.00005 | 0.00102476 |
| 759 | PLXNB2   | chr22:50713407-50746001       | PDT      | ATRA+PDT | 36.1477  | 43.869    | 0.279295          | 0.0043  | 0.0424749  |
| 760 | PLXND1   | chr3:129274055-129325582      | PDT      | ATRA+PDT | 4.77635  | 3.82235   | -0.32145          | 0.0049  | 0.0470101  |
| 761 | PMAIP1   | chr18:57567191-57571538       | PDT      | ATRA+PDT | 27.4374  | 39.4407   | 0.523542          | 0.00005 | 0.00102476 |
| 762 | PML      | chr15:74287013-74340155       | PDT      | ATRA+PDT | 2.86592  | 4.01457   | 0.486249          | 0.0006  | 0.00910057 |
| 763 | PMPCA    | chr9:139305115-139318213      | PDT      | ATRA+PDT | 61.022   | 49.0771   | -0.314278         | 0.0015  | 0.0184954  |
| 764 | PMS2CL   | chr7:6774935-6791232          | PDT      | ATRA+PDT | 1.72805  | 3.29832   | 0.932582          | 0.00015 | 0.00281494 |
| 765 | PNPLA2   | chr11:818900-825571           | PDT      | ATRA+PDT | 40.2315  | 51.0456   | 0.343462          | 0.0007  | 0.0103814  |
| 766 | POLI     | chr18:51795848-51824604       | PDT      | ATRA+PDT | 0.696334 | 1.13724   | 0.70768           | 0.0004  | 0.00650107 |
| 767 | POLR2L   | chr11:839720-842529           | PDT      | ATRA+PDT | 123.563  | 94.9511   | -0.37999          | 0.00005 | 0.00102476 |
| 768 | PPAP2B   | chr1:56960418-57045257        | PDT      | ATRA+PDT | 2.69017  | 3.70388   | 0.461337          | 0.0006  | 0.00910057 |
| 769 | PPARG    | chr3:12329348-12475855        | PDT      | ATRA+PDT | 63.8493  | 81.2108   | 0.347002          | 0.00035 | 0.00584867 |
| 770 | PPFIBP2  | chr11:7534995-7674996         | PDT      | ATRA+PDT | 3.94301  | 2.67874   | -0.557743         | 0.0002  | 0.00358322 |
| 771 | PPIF     | chr10:81107219-81115089       | PDT      | ATRA+PDT | 91.7911  | 72.915    | -0.33214          | 0.0004  | 0.00650107 |
| 772 | PPL      | chr16:4932507-4987136         | PDT      | ATRA+PDT | 16.0735  | 20.51     | 0.351644          | 0.00035 | 0.00584867 |
| 773 | PPP1R10  | chr6_ssto_hap7:1900460-191725 | PDT      | ATRA+PDT | 31.3853  | 42.0273   | 0.421239          | 0.00005 | 0.00102476 |
| 774 | PPP1R15A | chr19:49375648-49379319       | PDT      | ATRA+PDT | 282.868  | 421.57369 | 0.57369           | 0.00005 | 0.00102476 |
| 775 | PPP1R1B  | chr17:37783176-37792878       | PDT      | ATRA+PDT | 8.15642  | 2.98407   | -1.45065          | 0.00005 | 0.00102476 |
| 776 | PPP1R21  | chr2:48667907-48742531        | PDT      | ATRA+PDT | 4.05097  | 5.46955   | 0.433155          | 0.00075 | 0.0109256  |
| 777 | PPP1R3B  | chr8:8993763-9009152          | PDT      | ATRA+PDT | 3.24328  | 2.51084   | -0.369287         | 0.00365 | 0.0375479  |
| 778 | PPP2R5B  | chr11:64692142-64703360       | PDT      | ATRA+PDT | 1.19621  | 1.8247    | 0.609196          | 0.0052  | 0.0492248  |
| 779 | PPP4R1L  | chr20:56807832-56884495       | PDT      | ATRA+PDT | 3.49219  | 4.75011   | 0.443829          | 0.00165 | 0.0198632  |
| 780 | PRAP1    | chr10:135160843-135166187     | PDT      | ATRA+PDT | 3.20396  | 1.43399   | -1.15982          | 0.00515 | 0.0488381  |
| 781 | PRDM8    | chr4:81106423-81125482        | PDT      | ATRA+PDT | 1.23561  | 1.83677   | 0.57195           | 0.0016  | 0.0194588  |
| 782 | PRDX4    | chrX:23685644-23704514        | PDT      | ATRA+PDT | 57.3371  | 45.153    | -0.344648         | 0.00155 | 0.0189586  |
| 783 | PRIC285  | chr20:62189438-62205592       | PDT      | ATRA+PDT | 3.42848  | 5.91896   | 0.787776          | 0.00005 | 0.00102476 |
| 784 | PRKAR2A  | chr3:48788092-48885270        | PDT      | ATRA+PDT | 16.3822  | 12.1706   | -0.42873          | 0.0003  | 0.00511725 |
| 785 | PRKCA    | chr17:64298925-64806862       | PDT      | ATRA+PDT | 5.41637  | 6.90526   | 0.35037           | 0.00075 | 0.0109256  |
| 786 | PRKD2    | chr19:47150868-47220384       | PDT      | ATRA+PDT | 33.1834  | 42.336    | 0.351424          | 0.00055 | 0.0085238  |
| 787 | PROCR    | chr20:33759773-33765165       | PDT      | ATRA+PDT | 45.1156  | 30.1563   | -0.581167         | 0.00005 | 0.00102476 |
| 788 | PRODH    | chr22:18900286-18924066       | PDT      | ATRA+PDT | 1.66635  | 0.459819  | -1.85756          | 0.0001  | 0.00194145 |
| 789 | PROS1    | chr3:93591880-93692934        | PDT      | ATRA+PDT | 4.99684  | 3.49117   | -0.517305         | 0.00025 | 0.00439786 |
| 790 | PRR15L   | chr17:46029333-46035110       | PDT      | ATRA+PDT | 3.83366  | 2.37869   | -0.688556         | 0.00145 | 0.0179618  |
| 791 | PRRG4    | chr11:32851480-32879669       | PDT      | ATRA+PDT | 9.22956  | 11.4977   | 0.317005          | 0.00255 | 0.0276998  |
| 792 | PSCA     | chr8:143751725-143764145      | PDT      | ATRA+PDT | 1.7825   | 0.615034  | -1.53516          | 0.002   | 0.0229388  |
| 793 | PSMB10   | chr16:67968406-67970780       | PDT      | ATRA+PDT | 18.4903  | 29.683    | 0.682866          | 0.00005 | 0.00102476 |
| 794 | PSMB8    | chr6_ssto_hap7:4239266-425252 | PDT      | ATRA+PDT | 1.01457  | 4.79809   | 2.24159           | 0.00005 | 0.00102476 |
| 795 | PSME1    | chr14:24605377-24610797       | PDT      | ATRA+PDT | 97.3296  | 148.202   | 0.606612          | 0.00005 | 0.00102476 |
| 796 | PSME2    | chr14:24612573-24615855       | PDT      | ATRA+PDT | 82.8818  | 113.648   | 0.455451          | 0.00005 | 0.00102476 |
| 797 | PSPH     | chr7:56078743-56119268        | PDT      | ATRA+PDT | 23.4394  | 28.9095   | 0.302606          | 0.0037  | 0.0379161  |
| 798 | PTGS2    | chr1:186640943-186649559      | PDT      | ATRA+PDT | 3.23432  | 5.40639   | 0.741203          | 0.00005 | 0.00102476 |
| 799 | PTPN21   | chr14:88932121-89021123       | PDT      | ATRA+PDT | 3.89511  | 5.04068   | 0.371953          | 0.0014  | 0.0175049  |
| 800 | PTPN9    | chr15:75759461-75871625       | PDT      | ATRA+PDT | 15.0615  | 18.4692   | 0.294255          | 0.0047  | 0.0455001  |
| 801 | PTPRB    | chr12:70910631-71031220       | PDT      | ATRA+PDT | 2.99581  | 3.86343   | 0.366936          | 0.0007  | 0.0103814  |
| 802 | PTPRH    | chr19:55692614-55720874       | PDT      | ATRA+PDT | 24.2026  | 47.4306   | 0.970657          | 0.00005 | 0.00102476 |
| 803 | PXMP2    | chr12:133264191-133281577     | PDT      | ATRA+PDT | 30.9691  | 22.2824   | -0.474925         | 0.00025 | 0.00439786 |
| 804 | PYGB     | chr20:25228705-25371618       | PDT      | ATRA+PDT | 220.407  | 173.113   | -0.348456         | 0.00145 | 0.0179618  |
| 805 | QPCT     | chr2:37571752-37600465        | PDT      | ATRA+PDT | 28.6729  | 21.0747   | -0.444174         | 0.00005 | 0.00102476 |
| 806 | QSOX1    | chr1:180123967-180169859      | PDT      | ATRA+PDT | 33.2027  | 24.2491   | -0.453372         | 0.0001  | 0.00194145 |
| 807 | RAB27B   | chr18:52495707-52562747       | PDT      | ATRA+PDT | 4.65883  | 3.32112   | -0.4883           | 0.00005 | 0.00102476 |
| 808 | RAB30    | chr11:82692477-82782884       | PDT      | ATRA+PDT | 1.93354  | 3.05249   | 0.658741          | 0.0046  | 0.0446535  |
| 809 | RAB3D    | chr19:11406823-11450344       | PDT      | ATRA+PDT | 5.91284  | 3.44236   | -0.780454         | 0.00005 | 0.00102476 |
| 810 | RAB40B   | chr17:80614942-80656598       | PDT      | ATRA+PDT | 10.2786  | 7.73325   | -0.410498         | 0.00135 | 0.0171     |
| 811 | RAB40C   | chr16:639356-679273           | PDT      | ATRA+PDT | 9.25892  | 7.21951   | -0.358942         | 0.00405 | 0.0405304  |
| 812 | RAET1K   | chr6:150319154-150326280      | PDT      | ATRA+PDT | 0.984729 | 1.75706   | 0.83536           | 0.0044  | 0.         |

Table S1: Significant differentially expressed genes (DEGs) after ATRA+PDT compared to PDT.

| #   | gene     | locus                        | sample_1 | sample_2 | value_1   | value_2  | log2(fold_change) | p_value | q_value    |
|-----|----------|------------------------------|----------|----------|-----------|----------|-------------------|---------|------------|
| 817 | RARG     | chr12:53604349-53626040      | PDT      | ATRA+PDT | 37.369    | 57.0455  | 0.610268          | 0.00005 | 0.00102476 |
| 818 | RARRES1  | chr3:158414896-158450275     | PDT      | ATRA+PDT | 2.68665   | 16.1452  | 2.58723           | 0.00005 | 0.00102476 |
| 819 | RARRES3  | chr11:63014620-63330855      | PDT      | ATRA+PDT | 7.65704   | 32.1209  | 2.06866           | 0.00005 | 0.00102476 |
| 820 | RASA1    | chr5:86564069-86687743       | PDT      | ATRA+PDT | 32.5508   | 47.4891  | 0.544902          | 0.00005 | 0.00102476 |
| 821 | RASSF6   | chr4:74438861-74486340       | PDT      | ATRA+PDT | 4.25043   | 5.66768  | 0.415152          | 0.0007  | 0.0103814  |
| 822 | RBM48    | chr7:92158086-92166823       | PDT      | ATRA+PDT | 9.83332   | 12.7478  | 0.374499          | 0.00345 | 0.0359757  |
| 823 | RBPMS    | chr8:30239634-30429734       | PDT      | ATRA+PDT | 5.87097   | 8.64539  | 0.558333          | 0.00015 | 0.00281494 |
| 824 | RBPMS2   | chr15:65032094-65067770      | PDT      | ATRA+PDT | 3.70713   | 2.624    | -0.498537         | 0.0038  | 0.0386074  |
| 825 | RCAN1    | chr21:35888783-35987382      | PDT      | ATRA+PDT | 4.20594   | 6.83073  | 0.69961           | 0.00005 | 0.00102476 |
| 826 | RCAN3    | chr1:24822822-24863510       | PDT      | ATRA+PDT | 12.2376   | 18.93    | 0.629347          | 0.00005 | 0.00102476 |
| 827 | RCBTB1   | chr13:50106081-50159719      | PDT      | ATRA+PDT | 8.17925   | 11.2587  | 0.461001          | 0.00005 | 0.00102476 |
| 828 | RCN1     | chr11:32112476-32127272      | PDT      | ATRA+PDT | 16.5146   | 24.007   | 0.539712          | 0.00005 | 0.00102476 |
| 829 | REG4     | chr1:120336640-120354203     | PDT      | ATRA+PDT | 70.8796   | 2.04563  | -5.11475          | 0.00005 | 0.00102476 |
| 830 | REL      | chr2:61108751-61150178       | PDT      | ATRA+PDT | 4.36843   | 5.64892  | 0.37086           | 0.0039  | 0.0394358  |
| 831 | REN      | chr1:204123943-204135465     | PDT      | ATRA+PDT | 0.636161  | 2.66058  | 2.06428           | 0.00005 | 0.00102476 |
| 832 | REPS2    | chrX:16964813-17171403       | PDT      | ATRA+PDT | 2.24299   | 2.91552  | 0.378333          | 0.00235 | 0.0259765  |
| 833 | REXO2    | chr11:114310107-114321000    | PDT      | ATRA+PDT | 94.0016   | 77.1618  | -0.284798         | 0.00515 | 0.0488381  |
| 834 | RG9MTD1  | chr3:101280711-101285089     | PDT      | ATRA+PDT | 57.3518   | 42.9105  | -0.418507         | 0.00005 | 0.00102476 |
| 835 | RGS2     | chr1:192778168-192781407     | PDT      | ATRA+PDT | 28.7673   | 45.9333  | 0.67511           | 0.00005 | 0.00102476 |
| 836 | RHBDD2   | chr7:75508316-75518244       | PDT      | ATRA+PDT | 24.1826   | 30.4657  | 0.333219          | 0.00235 | 0.0259765  |
| 837 | RHBDD3   | chr22:29655843-29663914      | PDT      | ATRA+PDT | 8.435     | 10.8511  | 0.363385          | 0.0043  | 0.0424749  |
| 838 | RHOB     | chr2:20646834-20649201       | PDT      | ATRA+PDT | 80.1921   | 101.159  | 0.33509           | 0.00055 | 0.0085238  |
| 839 | RHOD     | chr11:66824288-66839488      | PDT      | ATRA+PDT | 10.1643   | 7.44284  | -0.44958          | 0.0025  | 0.027212   |
| 840 | RHOU     | chr1:228780393-228882416     | PDT      | ATRA+PDT | 5.61287   | 2.90298  | -0.951202         | 0.00005 | 0.00102476 |
| 841 | RNASE4   | chr14:21152335-21168758      | PDT      | ATRA+PDT | 2.37664   | 0.837993 | -1.50391          | 0.00085 | 0.0119898  |
| 842 | RND3     | chr2:151324706-151344209     | PDT      | ATRA+PDT | 49.8429   | 67.3551  | 0.434401          | 0.00005 | 0.00102476 |
| 843 | RNF126   | chr19:647525-663233          | PDT      | ATRA+PDT | 18.2231   | 13.7825  | -0.402933         | 0.0006  | 0.00910057 |
| 844 | RNF128   | chrX:105937067-106040246     | PDT      | ATRA+PDT | 24.7876   | 18.2125  | -0.444685         | 0.00005 | 0.00102476 |
| 845 | RNF19A   | chr8:101269287-101322327     | PDT      | ATRA+PDT | 11.9951   | 14.7277  | 0.296081          | 0.00435 | 0.0428104  |
| 846 | RNF213   | chr17:78234659-78411884      | PDT      | ATRA+PDT | 3.77922   | 5.10192  | 0.432953          | 0.0004  | 0.00650107 |
| 847 | RNF24    | chr20:3912068-3996216        | PDT      | ATRA+PDT | 8.05694   | 5.00173  | -0.687806         | 0.00005 | 0.00102476 |
| 848 | ROR1     | chr1:64239689-64644707       | PDT      | ATRA+PDT | 10.0918   | 17.2802  | 0.77594           | 0.00005 | 0.00102476 |
| 849 | RPH3AL   | chr17:62179-202633           | PDT      | ATRA+PDT | 5.19426   | 6.82169  | 0.393211          | 0.0021  | 0.0238805  |
| 850 | RPS6KB2  | chr11:67195934-67202879      | PDT      | ATRA+PDT | 32.1139   | 25.1005  | -0.355484         | 0.0008  | 0.0114972  |
| 851 | RPUSD1   | chr16:834973-838383          | PDT      | ATRA+PDT | 16.0041   | 11.7535  | -0.445345         | 0.0002  | 0.00358322 |
| 852 | RTKN     | chr2:74652987-74669060       | PDT      | ATRA+PDT | 17.4717   | 13.5318  | -0.368662         | 0.00115 | 0.0151042  |
| 853 | RUNX2    | chr6:44796469-45518819       | PDT      | ATRA+PDT | 0.807263  | 1.52946  | 0.921912          | 0.0022  | 0.024728   |
| 854 | S100A10  | chr1:151955385-151966714     | PDT      | ATRA+PDT | 722.813   | 500.148  | -0.531269         | 0.00005 | 0.00102476 |
| 855 | S100A14  | chr1:153586731-153588808     | PDT      | ATRA+PDT | 76.7108   | 35.2653  | -1.12118          | 0.00005 | 0.00102476 |
| 856 | S100A16  | chr1:153579366-153585514     | PDT      | ATRA+PDT | 239.074   | 168.412  | -0.505466         | 0.00005 | 0.00102476 |
| 857 | S100A2   | chr1:153533584-153538306     | PDT      | ATRA+PDT | 18.6421   | 14.2378  | -0.388835         | 0.002   | 0.0229388  |
| 858 | S100A4   | chr1:153516094-153518282     | PDT      | ATRA+PDT | 326.579   | 215.965  | -0.596635         | 0.00005 | 0.00102476 |
| 859 | SAMD12   | chr8:119201694-119738306     | PDT      | ATRA+PDT | 7.72496   | 10.9211  | 0.499518          | 0.00005 | 0.00102476 |
| 860 | SAMD4A   | chr14:55034329-55260033      | PDT      | ATRA+PDT | 9.68298   | 12.3034  | 0.345532          | 0.0007  | 0.0103814  |
| 861 | SAMD9    | chr7:92728825-92747336       | PDT      | ATRA+PDT | 8.37085   | 23.382   | 1.48196           | 0.00005 | 0.00102476 |
| 862 | SAPCD2   | chr9:139956578-139965028     | PDT      | ATRA+PDT | 32.3841   | 26.2546  | -0.302715         | 0.0022  | 0.024728   |
| 863 | SAT1     | chrX:23801274-23804327       | PDT      | ATRA+PDT | 77.3754   | 104.301  | 0.4308            | 0.00005 | 0.00102476 |
| 864 | SBN02    | chr19:1107632-1174282        | PDT      | ATRA+PDT | 7.70866   | 10.4313  | 0.436367          | 0.00005 | 0.00102476 |
| 865 | SC5DL    | chr11:121163387-121184119    | PDT      | ATRA+PDT | 25.2215   | 19.8586  | -0.344895         | 0.00025 | 0.00439786 |
| 866 | SCARB1   | chr12:125262173-125348519    | PDT      | ATRA+PDT | 40.9505   | 31.1269  | -0.395722         | 0.00005 | 0.00102476 |
| 867 | SCEL     | chr13:78109808-78219398      | PDT      | ATRA+PDT | 9.97633   | 19.3169  | 0.953286          | 0.00005 | 0.00102476 |
| 868 | SCO1     | chr17:10583648-10600885      | PDT      | ATRA+PDT | 21.1395   | 16.1884  | -0.384976         | 0.0006  | 0.00910057 |
| 869 | SDC4     | chr20:43953928-43977064      | PDT      | ATRA+PDT | 97.778    | 124.698  | 0.350852          | 0.0002  | 0.00358322 |
| 870 | SDCCAG8  | chr1:243419306-244006886     | PDT      | ATRA+PDT | 4.41229   | 5.76522  | 0.385848          | 0.0036  | 0.0371409  |
| 871 | SDF2L1   | chr22:21996541-21998588      | PDT      | ATRA+PDT | 13.9605   | 10.0903  | -0.468384         | 0.0018  | 0.0212615  |
| 872 | SEC11C   | chr18:56807124-56826063      | PDT      | ATRA+PDT | 36.4528   | 28.2563  | -0.36746          | 0.0033  | 0.0346484  |
| 873 | SEC14L2  | chr22:30792929-30821291      | PDT      | ATRA+PDT | 2.02921   | 3.7383   | 0.881462          | 0.00005 | 0.00102476 |
| 874 | SEC24D   | chr4:119643977-119757326     | PDT      | ATRA+PDT | 10.2168   | 7.21767  | -0.501332         | 0.00005 | 0.00102476 |
| 875 | SEC61A1  | chr3:127771211-127790526     | PDT      | ATRA+PDT | 128.699   | 104.128  | -0.30565          | 0.00235 | 0.0259765  |
| 876 | SEC61B   | chr9:101984569-101992901     | PDT      | ATRA+PDT | 162.163   | 128.308  | -0.337826         | 0.00125 | 0.0161202  |
| 877 | SEC61G   | chr7:54819939-54826939       | PDT      | ATRA+PDT | 301.576   | 241.039  | -0.323257         | 0.0022  | 0.024728   |
| 878 | SEMA3A   | chr7:83587658-83824217       | PDT      | ATRA+PDT | 5.20312   | 7.70564  | 0.566537          | 0.00005 | 0.00102476 |
| 879 | SEMA3B   | chr3:50305039-50314572       | PDT      | ATRA+PDT | 13.5343   | 16.9983  | 0.328766          | 0.0022  | 0.024728   |
| 880 | SEMA3E   | chr7:82993221-83278479       | PDT      | ATRA+PDT | 1.42158   | 0.875195 | -0.699815         | 0.00005 | 0.00102476 |
| 881 | SEMA4B   | chr15:90728151-90772892      | PDT      | ATRA+PDT | 58.9744   | 90.4247  | 0.616629          | 0.00005 | 0.00102476 |
| 882 | SEMA7A   | chr15:74701629-74726299      | PDT      | ATRA+PDT | 5.13759   | 8.93069  | 0.797679          | 0.00005 | 0.00102476 |
| 883 | SERINC5  | chr5:79407049-79551898       | PDT      | ATRA+PDT | 34.2876   | 27.0545  | -0.341818         | 0.00035 | 0.00584867 |
| 884 | SERPINA1 | chr14:94843083-94857029      | PDT      | ATRA+PDT | 52.1035   | 35.7555  | -0.543216         | 0.00005 | 0.00102476 |
| 885 | SERPINA3 | chr14:95078713-95090390      | PDT      | ATRA+PDT | 0.68675   | 2.43736  | 1.82746           | 0.0001  | 0.00194145 |
| 886 | SERPINA5 | chr14:95047730-95059457      | PDT      | ATRA+PDT | 0.689563  | 1.79855  | 1.38308           | 0.00005 | 0.00102476 |
| 887 | SERPINE2 | chr2:224839764-224904036     | PDT      | ATRA+PDT | 12.5507   | 8.2725   | -0.601378         | 0.00005 | 0.00102476 |
| 888 | SERPINH1 | chr11:75273100-75283849      | PDT      | ATRA+PDT | 64.3244   | 101.369  | 0.656182          | 0.00005 | 0.00102476 |
| 889 | SERTAD2  | chr2:64858754-64881046       | PDT      | ATRA+PDT | 33.6969   | 42.7119  | 0.342025          | 0.0004  | 0.00650107 |
| 890 | SESN2    | chr1:28585962-28609002       | PDT      | ATRA+PDT | 31.424    | 51.1889  | 0.703964          | 0.00005 | 0.00102476 |
| 891 | SEZ6L2   | chr16:29882479-29910585      | PDT      | ATRA+PDT | 3.51491   | 4.63187  | 0.398107          | 0.002   | 0.0229388  |
| 892 | SFTA2    | chr6_qbl_hap6:2192097-219292 | PDT      | ATRA+PDT | 18.8994   | 11.8409  | -0.674553         | 0.0021  | 0.0238805  |
| 893 | SGK1     | chr6:134490383-134639196     | PDT      | ATRA+PDT | 13.7474   | 10.7069  | -0.360616         | 0.0014  | 0.0175049  |
| 894 | SH2B3    | chr12:111843751-111889427    | PDT      | ATRA+PDT | 3.18564   | 4.18057  | 0.392119          | 0.00115 | 0.0151042  |
| 895 | SH2D3A   | chr19:6752172-6767523        | PDT      | ATRA+PDT | 14.9455   | 19.5506  | 0.3875            | 0.00045 | 0.00719326 |
| 896 | SH3BGRL2 | chr6:80340999-80413369       | PDT      | ATRA+PDT | 22.0365   | 15.048   | -0.550319         | 0.00005 | 0.00102476 |
| 897 | SH3RF2   | chr5:145316125-145442879     | PDT      | ATRA+PDT | 8.67702   | 6.11854  | -0.504012         | 0.00005 | 0.00102476 |
| 898 | SHCBP1   | chr16:46614467-46655311      | PDT      | ATRA+PDT | 9.33162   | 7.17744  | -0.378658         | 0.001   | 0.0135165  |
| 899 | SHROOM1  | chr5:132157832-132166590     | PDT      | ATRA+PDT | 6.71456   | 9.36809  | 0.480463          | 0.00005 | 0.00102476 |
| 900 | SIGMAR1  | chr9:34634718-34637768       | PDT      | ATRA+PDT | 97.8308   | 78.3167  | -0.320969         | 0.00115 | 0.0151042  |
| 901 | SIPA1L1  | chr14:71996041-72206120      | PDT      | ATRA+PDT | 12.1664   | 15.2208  | 0.323133          | 0.0013  | 0.0166643  |
| 902 | SIPA1L2  | chr1:232533711-232651243     | PDT      | ATRA+PDT | 6.69335   | 4.95696  | -0.433271         | 0.0002  | 0.00358322 |
| 903 | SIX4     | chr14:61176255-61190852      | PDT      | ATRA+PDT | 1.17064   | 1.96518  | 0.747368          | 0.00005 | 0.00102476 |
| 904 | SKAP1    | chr17:46210801-46507594      | PDT      | ATRA+PDT | 3.27684   | 4.95002  | 0.595128          | 0.00085 | 0.0119898  |
| 905 | SKAP2    | chr7:26706687-26904341       | PDT      | ATRA+PDT | 19.9257   | 29.4178  | 0.562056          | 0.00005 | 0.00102476 |
| 906 | SLC12A4  | chr16:67973786-68002597      | PDT      | ATRA+PDT | 3.92501   | 6.3475   | 0.693492          | 0.00005 | 0.00102476 |
| 907 | SLC16A1  | chr1:113454469-113498975     | PDT      | ATRA+PDT | 49.6228   | 38.2808  | -0.374383         | 0.0002  | 0.00358322 |
| 908 | SLC16A3  | chr17:80186281-80197375      | PDT      | ATRA+PDT | 14.5481   | 18.1504  | 0.319175          | 0.00425 | 0.0420979  |
| 909 | SLC17A9  | chr20:61583998-61599949      | PDT      | ATRA+PDT | 37.6118   | 30.334   | -0.310248         | 0.00245 | 0.0267496  |
| 910 | SLC22A18 | chr11:2909326-2946476        | PDT      | ATRA+PDT | 18.2722   | 13.6659  | -0.419075         | 0.00095 | 0.0131061  |
| 911 | SLC22A23 | chr6:3269206-3456793         | PDT      | ATRA+PDT | 1.72442   | 0.932151 | -0.887479         | 0.00005 | 0.00102476 |
| 912 | SLC22A5  | chr5:131630144-131731306     | PDT      | ATRA+PDT | 1.53996   | 2.33011  | 0.59751           | 0.00075 | 0.0109256  |
| 913 | SLC23A3  | chr2:220026180-220034817     | PDT      | ATRA+PDT | 2.36227   | 1.29953  | -0.862185         | 0.0004  | 0.00650107 |
| 914 | SLC24A1  | chr15:65914269-65948598      | PDT      | ATRA+PDT | 0.97534</ |          |                   |         |            |

Table S1: Significant differentially expressed genes (DEGs) after ATRA+PDT compared to PDT.

| #    | gene       | locus                         | sample_1 | sample_2 | value_1  | value_2  | log2(fold_change) | p_value | q_value    |
|------|------------|-------------------------------|----------|----------|----------|----------|-------------------|---------|------------|
| 919  | SLC2A12    | chr6:134308718-134373789      | PDT      | ATRA+PDT | 0.608026 | 1.3385   | 1.13841           | 0.00005 | 0.00102476 |
| 920  | SLC30A1    | chr1:211748380-211752099      | PDT      | ATRA+PDT | 50.3641  | 62.676   | 0.315518          | 0.00175 | 0.0207397  |
| 921  | SLC35E4    | chr22:31031792-31043862       | PDT      | ATRA+PDT | 4.46778  | 3.03284  | -0.558887         | 0.00015 | 0.00281494 |
| 922  | SLC38A5    | chrX:48316926-48328644        | PDT      | ATRA+PDT | 13.129   | 7.8112   | -0.749135         | 0.00005 | 0.00102476 |
| 923  | SLC39A10   | chr2:196521531-196602426      | PDT      | ATRA+PDT | 6.11085  | 4.30522  | -0.505288         | 0.00005 | 0.00102476 |
| 924  | SLC39A8    | chr4:103172197-103266655      | PDT      | ATRA+PDT | 9.63548  | 5.401    | -0.83513          | 0.00005 | 0.00102476 |
| 925  | SLC4A4     | chr4:72053002-72437804        | PDT      | ATRA+PDT | 2.03784  | 3.17406  | 0.639291          | 0.00005 | 0.00102476 |
| 926  | SLC7A7     | chr14:23242431-23289020       | PDT      | ATRA+PDT | 4.55966  | 0.977627 | -2.22157          | 0.00005 | 0.00102476 |
| 927  | SLC9A7     | chrX:46466372-46618472        | PDT      | ATRA+PDT | 4.74234  | 7.44846  | 0.651342          | 0.00005 | 0.00102476 |
| 928  | SLCO4A1    | chr20:61273796-61303647       | PDT      | ATRA+PDT | 26.2854  | 20.3592  | -0.368578         | 0.0003  | 0.00511725 |
| 929  | SLFN5      | chr17:33570085-33594761       | PDT      | ATRA+PDT | 2.51404  | 3.53672  | 0.492403          | 0.0002  | 0.00358322 |
| 930  | SMAD3      | chr15:67358194-67487533       | PDT      | ATRA+PDT | 59.5952  | 83.9935  | 0.49508           | 0.00005 | 0.00102476 |
| 931  | SMARCA1    | chrX:128580477-128657460      | PDT      | ATRA+PDT | 9.95072  | 12.3985  | 0.317295          | 0.0026  | 0.0281856  |
| 932  | SMCHD1     | chr18:2655885-2805015         | PDT      | ATRA+PDT | 21.4244  | 26.7571  | 0.320665          | 0.0007  | 0.0103814  |
| 933  | SMPD3      | chr16:68392229-68482409       | PDT      | ATRA+PDT | 2.86222  | 6.1399   | 1.10108           | 0.00005 | 0.00102476 |
| 934  | SMURF1     | chr7:98625057-98741743        | PDT      | ATRA+PDT | 44.3285  | 53.9284  | 0.282811          | 0.00475 | 0.045818   |
| 935  | SNAP23     | chr15:42787503-42825259       | PDT      | ATRA+PDT | 40.841   | 50.8188  | 0.315344          | 0.00155 | 0.0189586  |
| 936  | SNCG       | chr10:88718287-88723017       | PDT      | ATRA+PDT | 97.5439  | 65.8508  | -0.566852         | 0.00005 | 0.00102476 |
| 937  | SNTB1      | chr8:121547984-121824309      | PDT      | ATRA+PDT | 32.41    | 25.4212  | -0.350408         | 0.0004  | 0.00650107 |
| 938  | SORD       | chr15:45315301-45367287       | PDT      | ATRA+PDT | 55.6577  | 45.7389  | -0.283161         | 0.00425 | 0.0420979  |
| 939  | SORL1      | chr11:121322911-121504471     | PDT      | ATRA+PDT | 14.4875  | 11.7749  | -0.299093         | 0.0024  | 0.0263926  |
| 940  | SOSTDC1    | chr7:16501105-16505474        | PDT      | ATRA+PDT | 1.20435  | 0.404531 | -1.57393          | 0.0015  | 0.0184954  |
| 941  | SOX12      | chr20:306238-310867           | PDT      | ATRA+PDT | 1.2375   | 0.834728 | -0.568053         | 0.00315 | 0.0333027  |
| 942  | SOX4       | chr6:21593971-21598849        | PDT      | ATRA+PDT | 29.6801  | 40.2276  | 0.438686          | 0.00005 | 0.00102476 |
| 943  | SP100      | chr2:231280870-231410317      | PDT      | ATRA+PDT | 15.6481  | 20.7536  | 0.407377          | 0.00035 | 0.00584867 |
| 944  | SP110      | chr2:231033644-231090444      | PDT      | ATRA+PDT | 3.29061  | 4.76151  | 0.533064          | 0.0002  | 0.00358322 |
| 945  | SP140L     | chr2:231191893-231268445      | PDT      | ATRA+PDT | 4.7695   | 7.90811  | 0.729495          | 0.00005 | 0.00102476 |
| 946  | SPCS3      | chr4:177241089-177253396      | PDT      | ATRA+PDT | 26.9071  | 20.9101  | -0.363784         | 0.00015 | 0.00281494 |
| 947  | SPDEF      | chr6:34505578-34524110        | PDT      | ATRA+PDT | 16.5058  | 8.19596  | -1.00999          | 0.00005 | 0.00102476 |
| 948  | SPHK2      | chr19:49122547-49133663       | PDT      | ATRA+PDT | 7.70829  | 9.8477   | 0.353375          | 0.00385 | 0.0390041  |
| 949  | SPINK1     | chr5:147204142-147211260      | PDT      | ATRA+PDT | 106.5    | 158.725  | 0.575683          | 0.00005 | 0.00102476 |
| 950  | SPINK4     | chr9:33240195-33248565        | PDT      | ATRA+PDT | 5.51131  | 0        | -inf              | 0.00005 | 0.00102476 |
| 951  | SQLE       | chr8:126010719-126034525      | PDT      | ATRA+PDT | 278.875  | 208.842  | -0.417209         | 0.00005 | 0.00102476 |
| 952  | SRD5A3     | chr4:56212387-56251747        | PDT      | ATRA+PDT | 1.50107  | 2.06191  | 0.457987          | 0.0035  | 0.0363197  |
| 953  | SRI        | chr7:87834431-87856308        | PDT      | ATRA+PDT | 43.9469  | 59.8828  | 0.446382          | 0.00005 | 0.00102476 |
| 954  | SRPRB      | chr3:133502876-133540336      | PDT      | ATRA+PDT | 34.7247  | 28.4416  | -0.287961         | 0.00425 | 0.0420979  |
| 955  | SSFA2      | chr2:182756471-182795464      | PDT      | ATRA+PDT | 79.3028  | 63.3638  | -0.323715         | 0.0009  | 0.0125788  |
| 956  | SSR1       | chr6:7281287-7313541          | PDT      | ATRA+PDT | 18.5387  | 15.3097  | -0.276093         | 0.00515 | 0.0488381  |
| 957  | ST3GAL2    | chr16:70413337-70472991       | PDT      | ATRA+PDT | 2.67229  | 1.86208  | -0.521164         | 0.00005 | 0.00102476 |
| 958  | ST3GAL4    | chr11:126225539-126284536     | PDT      | ATRA+PDT | 83.6796  | 64.7482  | -0.370035         | 0.0001  | 0.00194145 |
| 959  | ST6GALNAC1 | chr17:74620844-74639894       | PDT      | ATRA+PDT | 1.73672  | 0.466286 | -1.89708          | 0.00005 | 0.00102476 |
| 960  | ST6GALNAC4 | chr9:130670164-130679305      | PDT      | ATRA+PDT | 9.82944  | 6.35071  | -0.630191         | 0.00005 | 0.00102476 |
| 961  | STAG3L4    | chr7:66767624-66786513        | PDT      | ATRA+PDT | 4.26266  | 6.58727  | 0.627925          | 0.00005 | 0.00102476 |
| 962  | STARD10    | chr11:72465773-72504750       | PDT      | ATRA+PDT | 89.0213  | 63.1855  | -0.494558         | 0.00005 | 0.00102476 |
| 963  | STEAP1     | chr7:89783688-89794141        | PDT      | ATRA+PDT | 4.94591  | 9.43399  | 0.931631          | 0.00005 | 0.00102476 |
| 964  | STEAP2     | chr7:89840999-89866992        | PDT      | ATRA+PDT | 2.36953  | 4.0594   | 0.776666          | 0.0003  | 0.00511725 |
| 965  | STEAP3     | chr2:119981383-120023227      | PDT      | ATRA+PDT | 8.3467   | 6.32523  | -0.400089         | 0.00035 | 0.00584867 |
| 966  | STEAP4     | chr7:87905743-87936228        | PDT      | ATRA+PDT | 1.91198  | 2.73698  | 0.517518          | 0.00005 | 0.00102476 |
| 967  | STK17A     | chr7:43622691-43666978        | PDT      | ATRA+PDT | 11.1558  | 15.412   | 0.466257          | 0.00005 | 0.00102476 |
| 968  | STK32C     | chr10:134020995-134121477     | PDT      | ATRA+PDT | 4.70709  | 3.51555  | -0.421086         | 0.0037  | 0.0379161  |
| 969  | STK39      | chr2:168810529-169104105      | PDT      | ATRA+PDT | 62.3222  | 86.5812  | 0.474308          | 0.00005 | 0.00102476 |
| 970  | STMN1      | chr1:26210676-26233368        | PDT      | ATRA+PDT | 170.312  | 210.954  | 0.308745          | 0.00145 | 0.0179618  |
| 971  | STOX1      | chr10:70587293-70655209       | PDT      | ATRA+PDT | 0.733568 | 1.32757  | 0.855784          | 0.0024  | 0.0263926  |
| 972  | STRA6      | chr15:74471807-74502046       | PDT      | ATRA+PDT | 0.553158 | 1.47588  | 1.41581           | 0.00005 | 0.00102476 |
| 973  | STX1A      | chr7:73113534-73134017        | PDT      | ATRA+PDT | 24.2662  | 30.793   | 0.343655          | 0.00085 | 0.0119898  |
| 974  | SUCLA2     | chr13:48516790-48575462       | PDT      | ATRA+PDT | 29.5879  | 23.5821  | -0.327312         | 0.00205 | 0.0234618  |
| 975  | SULT2B1    | chr19:49055428-49102684       | PDT      | ATRA+PDT | 30.4892  | 18.3777  | -0.730343         | 0.00005 | 0.00102476 |
| 976  | SUV420H2   | chr19:55851220-55859489       | PDT      | ATRA+PDT | 4.81079  | 6.42984  | 0.418508          | 0.0012  | 0.0156263  |
| 977  | SVIL       | chr10:29746276-30024730       | PDT      | ATRA+PDT | 4.67726  | 6.41431  | 0.45563           | 0.00005 | 0.00102476 |
| 978  | SWAP70     | chr11:9685627-9774507         | PDT      | ATRA+PDT | 10.2031  | 13.3352  | 0.386231          | 0.0004  | 0.00650107 |
| 979  | SYT7       | chr11:61281187-61348344       | PDT      | ATRA+PDT | 2.19574  | 1.45466  | -0.59402          | 0.00005 | 0.00102476 |
| 980  | SYTL2      | chr11:85405264-85522178       | PDT      | ATRA+PDT | 6.81333  | 9.03548  | 0.407242          | 0.00035 | 0.00584867 |
| 981  | SYTL5      | chrX:37865834-37988073        | PDT      | ATRA+PDT | 1.21634  | 0.704342 | -0.788197         | 0.0003  | 0.00511725 |
| 982  | TAF1A      | chr1:222731243-222763275      | PDT      | ATRA+PDT | 11.8473  | 16.7531  | 0.499865          | 0.00005 | 0.00102476 |
| 983  | TAF1D      | chr11:93469095-93474703       | PDT      | ATRA+PDT | 74.4728  | 92.6756  | 0.315475          | 0.00195 | 0.0225592  |
| 984  | TAP2       | chr6_ssto_hap7:4220532-423731 | PDT      | ATRA+PDT | 8.33497  | 15.5791  | 0.902366          | 0.00005 | 0.00102476 |
| 985  | TAPBP      | chr6_qbl_hap6:4499711-451441  | PDT      | ATRA+PDT | 17.4531  | 27.3118  | 0.646043          | 0.00005 | 0.00102476 |
| 986  | TAPBPL     | chr12:6561176-6579843         | PDT      | ATRA+PDT | 0.508899 | 1.72817  | 1.7638            | 0.00035 | 0.00584867 |
| 987  | TBC1D1     | chr4:37892704-38140796        | PDT      | ATRA+PDT | 10.7113  | 14.0503  | 0.391464          | 0.00025 | 0.00439786 |
| 988  | TBC1D2     | chr9:100961279-101018003      | PDT      | ATRA+PDT | 9.12037  | 6.95428  | -0.391191         | 0.0011  | 0.0146092  |
| 989  | TBC1D4     | chr13:75858808-76056250       | PDT      | ATRA+PDT | 15.7906  | 12.6676  | -0.317923         | 0.00105 | 0.0140676  |
| 990  | TBC1D9     | chr4:141541935-141677471      | PDT      | ATRA+PDT | 4.7026   | 6.63498  | 0.496634          | 0.00005 | 0.00102476 |
| 991  | TBL1X      | chrX:9431334-9687780          | PDT      | ATRA+PDT | 9.27934  | 5.89633  | -0.654204         | 0.00005 | 0.00102476 |
| 992  | TBL3       | chr16:2022063-2028751         | PDT      | ATRA+PDT | 21.0564  | 16.4915  | -0.35254          | 0.0013  | 0.0166643  |
| 993  | TBXAS1     | chr7:139478046-139720125      | PDT      | ATRA+PDT | 7.8039   | 11.8389  | 0.601267          | 0.00005 | 0.00102476 |
| 994  | TCEAL1     | chrX:102883647-102885876      | PDT      | ATRA+PDT | 1.55868  | 2.89536  | 0.893418          | 0.00215 | 0.0243712  |
| 995  | TCN2       | chr22:31003069-31023047       | PDT      | ATRA+PDT | 4.27892  | 2.4986   | -0.776127         | 0.00005 | 0.00102476 |
| 996  | TCP11L2    | chr12:106696580-106740792     | PDT      | ATRA+PDT | 7.1208   | 10.0693  | 0.499859          | 0.0002  | 0.00358322 |
| 997  | TCTN2      | chr12:124155659-124192950     | PDT      | ATRA+PDT | 2.0913   | 3.06846  | 0.553113          | 0.00085 | 0.0119898  |
| 998  | TEAD2      | chr19:49838676-49865714       | PDT      | ATRA+PDT | 13.329   | 26.0582  | 0.967171          | 0.00005 | 0.00102476 |
| 999  | TFF3       | chr21:43731776-43735706       | PDT      | ATRA+PDT | 6.41603  | 0.37653  | -4.09084          | 0.0026  | 0.0281856  |
| 1000 | TFPI       | chr2:188328957-188419219      | PDT      | ATRA+PDT | 74.811   | 105.917  | 0.501613          | 0.00005 | 0.00102476 |
| 1001 | TGFB2      | chr1:218517537-218617961      | PDT      | ATRA+PDT | 2.41102  | 4.22929  | 0.810768          | 0.00005 | 0.00102476 |
| 1002 | TGFBR2     | chr3:30647993-30735633        | PDT      | ATRA+PDT | 27.0082  | 18.9255  | -0.513065         | 0.00005 | 0.00102476 |
| 1003 | TGM2       | chr20:36756863-36793700       | PDT      | ATRA+PDT | 10.6596  | 17.9277  | 0.75004           | 0.00005 | 0.00102476 |
| 1004 | TIA1       | chr2:70436575-70475779        | PDT      | ATRA+PDT | 14.983   | 19.6966  | 0.394623          | 0.00015 | 0.00281494 |
| 1005 | TINAGL1    | chr1:32042085-32053287        | PDT      | ATRA+PDT | 77.1995  | 103.768  | 0.426698          | 0.00005 | 0.00102476 |
| 1006 | TIPARP     | chr3:156390959-156424557      | PDT      | ATRA+PDT | 74.905   | 118.938  | 0.667071          | 0.00005 | 0.00102476 |
| 1007 | TJP1       | chr15:29992356-30114706       | PDT      | ATRA+PDT | 49.6946  | 60.8908  | 0.293135          | 0.00285 | 0.0305545  |
| 1008 | TJP2       | chr9:71736179-71870124        | PDT      | ATRA+PDT | 79.8813  | 100.228  | 0.327349          | 0.00095 | 0.0131061  |
| 1009 | TJP3       | chr19:3728373-3750682         | PDT      | ATRA+PDT | 4.72629  | 7.85532  | 0.732962          | 0.00005 | 0.00102476 |
| 1010 | TK2        | chr16:66541905-66584315       | PDT      | ATRA+PDT | 2.36491  | 3.59582  | 0.604535          | 0.00005 | 0.00102476 |
| 1011 | TM4SF4     | chr3:149192367-149221181      | PDT      | ATRA+PDT | 312.173  | 251.628  | -0.311053         | 0.0014  | 0.0175049  |
| 1012 | TMC5       | chr16:19422056-19510434       | PDT      | ATRA+PDT | 18.8617  | 28.4905  | 0.595021          | 0.00005 | 0.00102476 |
| 1013 | TMED1      | chr19:10943113-10946983       | PDT      | ATRA+PDT | 11.0032  | 8.3463   | -0.398713         | 0.0017  | 0.0202822  |
| 1014 | TMED3      | chr15:79603490-79615189       | PDT      | ATRA+PDT | 88.2767  | 67.8847  | -0.378947         | 0.0002  | 0.00358322 |
| 1015 | TMEM141    | chr9:139685776-139687769      | PDT      | ATRA+PDT | 114.982  | 93.1895  | -0.303171         | 0.00285 | 0.0305545  |
| 1016 | TMEM147    | chr19:36024313-36038429       |          |          |          |          |                   |         |            |

Table S1: Significant differentially expressed genes (DEGs) after ATRA+PDT compared to PDT.

| #    | gene      | locus                         | sample_1 | sample_2 | value_1  | value_2 | log2(fold_change) | p_value | q_value    |
|------|-----------|-------------------------------|----------|----------|----------|---------|-------------------|---------|------------|
| 1021 | TNFRSF12A | chr16:3070312-3072383         | PDT      | ATRA+PDT | 260.635  | 317.793 | 0.286056          | 0.003   | 0.0318746  |
| 1022 | TNK2      | chr3:195590235-195635880      | PDT      | ATRA+PDT | 17.786   | 22.1477 | 0.316414          | 0.0023  | 0.0255827  |
| 1023 | TOB1      | chr17:48939586-48945732       | PDT      | ATRA+PDT | 47.7377  | 35.9599 | -0.40874          | 0.00005 | 0.00102476 |
| 1024 | TP53I11   | chr11:44785975-44972608       | PDT      | ATRA+PDT | 26.3408  | 41.2581 | 0.647376          | 0.00005 | 0.00102476 |
| 1025 | TP53INP2  | chr20:33292147-33301237       | PDT      | ATRA+PDT | 2.06393  | 2.71965 | 0.398031          | 0.0038  | 0.0386074  |
| 1026 | TPPP      | chr5:659976-693510            | PDT      | ATRA+PDT | 4.12975  | 2.4613  | -0.746634         | 0.00005 | 0.00102476 |
| 1027 | TRAF4     | chr17:27071022-27077976       | PDT      | ATRA+PDT | 44.8849  | 57.8295 | 0.365577          | 0.0002  | 0.00358322 |
| 1028 | TRAPPC6A  | chr19:45666185-45681485       | PDT      | ATRA+PDT | 16.4438  | 10.1838 | -0.691265         | 0.00005 | 0.00102476 |
| 1029 | TRIM21    | chr11:4406126-4414926         | PDT      | ATRA+PDT | 4.84589  | 7.53851 | 0.637519          | 0.00005 | 0.00102476 |
| 1030 | TRIM25    | chr17:54965269-54991409       | PDT      | ATRA+PDT | 26.2805  | 33.0008 | 0.32851           | 0.00105 | 0.0140676  |
| 1031 | TRIM29    | chr11:119981993-120008863     | PDT      | ATRA+PDT | 25.5675  | 18.1135 | -0.497249         | 0.00005 | 0.00102476 |
| 1032 | TRIM3     | chr11:6469842-6495689         | PDT      | ATRA+PDT | 2.8097   | 1.83959 | -0.611033         | 0.0004  | 0.00650107 |
| 1033 | TRIM31    | chr6_ssto_hap7:1401126-141131 | PDT      | ATRA+PDT | 23.1248  | 76.6326 | 1.72852           | 0.00005 | 0.00102476 |
| 1034 | TRIM38    | chr6:25963070-25985352        | PDT      | ATRA+PDT | 2.49065  | 4.52013 | 0.859841          | 0.00005 | 0.00102476 |
| 1035 | TRIM56    | chr7:100728785-100733889      | PDT      | ATRA+PDT | 8.56345  | 11.6197 | 0.440307          | 0.00005 | 0.00102476 |
| 1036 | TRIM8     | chr10:104404251-104418076     | PDT      | ATRA+PDT | 18.8275  | 23.8045 | 0.338397          | 0.00125 | 0.0161202  |
| 1037 | TRIP6     | chr7:100464949-100471076      | PDT      | ATRA+PDT | 4.77133  | 6.54758 | 0.456571          | 0.0013  | 0.0166643  |
| 1038 | TRMT6     | chr20:5918485-5931173         | PDT      | ATRA+PDT | 25.4935  | 20.6174 | -0.306271         | 0.0037  | 0.0379161  |
| 1039 | TRNP1     | chr1:27320194-27327377        | PDT      | ATRA+PDT | 94.1771  | 116.26  | 0.303907          | 0.00195 | 0.0225592  |
| 1040 | TRPS1     | chr8:116420723-116681228      | PDT      | ATRA+PDT | 7.50335  | 10.0167 | 0.416798          | 0.00005 | 0.00102476 |
| 1041 | TSC22D1   | chr13:45006278-45154568       | PDT      | ATRA+PDT | 68.9779  | 53.2376 | -0.373689         | 0.0001  | 0.00194145 |
| 1042 | TSC22D2   | chr3:150126787-150177615      | PDT      | ATRA+PDT | 22.2714  | 29.6708 | 0.413853          | 0.00005 | 0.00102476 |
| 1043 | TSC22D3   | chrX:106956451-107019017      | PDT      | ATRA+PDT | 10.6117  | 20.1811 | 0.927348          | 0.00005 | 0.00102476 |
| 1044 | TSFM      | chr12:58176527-58209852       | PDT      | ATRA+PDT | 30.5172  | 24.5388 | -0.314557         | 0.00515 | 0.0488381  |
| 1045 | TSPAN13   | chr7:16793350-16824161        | PDT      | ATRA+PDT | 57.6264  | 41.0611 | -0.488958         | 0.00005 | 0.00102476 |
| 1046 | TSPAN4    | chr11:842823-867116           | PDT      | ATRA+PDT | 9.36181  | 5.15974 | -0.85949          | 0.00005 | 0.00102476 |
| 1047 | TSPAN6    | chrX:99883794-99891794        | PDT      | ATRA+PDT | 15.0487  | 18.9021 | 0.328911          | 0.0036  | 0.0371409  |
| 1048 | TSPAN8    | chr12:71518876-71551779       | PDT      | ATRA+PDT | 409.565  | 337.399 | -0.279638         | 0.005   | 0.0477977  |
| 1049 | TST       | chr22:37406905-37415491       | PDT      | ATRA+PDT | 32.4685  | 25.9519 | -0.3232           | 0.00485 | 0.0466141  |
| 1050 | TSTA3     | chr8:144694787-144699732      | PDT      | ATRA+PDT | 50.2639  | 37.6337 | -0.417498         | 0.00005 | 0.00102476 |
| 1051 | TTC39A    | chr1:51752929-51810785        | PDT      | ATRA+PDT | 4.78511  | 3.21035 | -0.575822         | 0.0001  | 0.00194145 |
| 1052 | TUBA4A    | chr2:220110191-220136910      | PDT      | ATRA+PDT | 79.3541  | 57.7594 | -0.45825          | 0.00005 | 0.00102476 |
| 1053 | TUBB2A    | chr6:3153901-3157783          | PDT      | ATRA+PDT | 9.30193  | 7.19573 | -0.370388         | 0.0036  | 0.0371409  |
| 1054 | TUBGCP6   | chr22:50656117-50683400       | PDT      | ATRA+PDT | 3.25603  | 2.5207  | -0.369291         | 0.00375 | 0.0383182  |
| 1055 | TUFT1     | chr1:151512780-151556059      | PDT      | ATRA+PDT | 18.614   | 25.7644 | 0.46899           | 0.00005 | 0.00102476 |
| 1056 | TXK       | chr4:48068409-48136273        | PDT      | ATRA+PDT | 0.361822 | 1.3053  | 1.85103           | 0.00005 | 0.00102476 |
| 1057 | TXNDC5    | chr6:7727010-8102828          | PDT      | ATRA+PDT | 130.123  | 104.162 | -0.321045         | 0.0047  | 0.0455001  |
| 1058 | TXNIP     | chr1:145438461-145442628      | PDT      | ATRA+PDT | 51.5463  | 70.4953 | 0.451659          | 0.00005 | 0.00102476 |
| 1059 | UBC       | chr12:125396191-125399587     | PDT      | ATRA+PDT | 831.594  | 1063.52 | 0.354898          | 0.0019  | 0.0221245  |
| 1060 | UBXN11    | chr1:26608772-26647014        | PDT      | ATRA+PDT | 8.10727  | 10.8199 | 0.416395          | 0.00215 | 0.0243712  |
| 1061 | UCA1      | chr19:15939756-15946230       | PDT      | ATRA+PDT | 10.7972  | 17.4755 | 0.694673          | 0.00005 | 0.00102476 |
| 1062 | UGCG      | chr9:114659205-114695433      | PDT      | ATRA+PDT | 47.1696  | 59.2197 | 0.328219          | 0.0011  | 0.0146092  |
| 1063 | UGT1A10   | chr2:234526290-234681951      | PDT      | ATRA+PDT | 160.905  | 214.324 | 0.413587          | 0.00155 | 0.0189586  |
| 1064 | UGT8      | chr4:115519610-115598202      | PDT      | ATRA+PDT | 21.5381  | 17.0898 | -0.333753         | 0.0008  | 0.0114972  |
| 1065 | UNC93B1   | chr11:67758574-67771593       | PDT      | ATRA+PDT | 10.2936  | 13.4578 | 0.386694          | 0.00095 | 0.0131061  |
| 1066 | UPK3B     | chr7:76139744-76157199        | PDT      | ATRA+PDT | 12.5212  | 7.33083 | -0.772327         | 0.00005 | 0.00102476 |
| 1067 | UQCRRF51  | chr19:29698166-29704136       | PDT      | ATRA+PDT | 84.513   | 67.3338 | -0.327843         | 0.001   | 0.0135165  |
| 1068 | UQCRRHL   | chr1:16133656-16134194        | PDT      | ATRA+PDT | 29.9609  | 22.5527 | -0.409778         | 0.004   | 0.0401429  |
| 1069 | URB2      | chr1:229761980-229795946      | PDT      | ATRA+PDT | 12.5981  | 9.88058 | -0.350534         | 0.0006  | 0.00910057 |
| 1070 | USH1C     | chr11:17515441-17565963       | PDT      | ATRA+PDT | 22.9992  | 16.7359 | -0.458641         | 0.00005 | 0.00102476 |
| 1071 | USMG5     | chr10:105127723-105156270     | PDT      | ATRA+PDT | 401.557  | 316.853 | -0.34179          | 0.003   | 0.0318746  |
| 1072 | USP11     | chrX:47092313-47107727        | PDT      | ATRA+PDT | 12.1379  | 15.491  | 0.351919          | 0.001   | 0.0135165  |
| 1073 | USP53     | chr4:120133781-120216673      | PDT      | ATRA+PDT | 30.8233  | 40.165  | 0.381915          | 0.0002  | 0.00358322 |
| 1074 | VAMP5     | chr2:85811530-85820511        | PDT      | ATRA+PDT | 3.04146  | 7.92904 | 1.38238           | 0.00005 | 0.00102476 |
| 1075 | VDAC1     | chr5:133307565-133340824      | PDT      | ATRA+PDT | 108.093  | 85.0046 | -0.346664         | 0.0004  | 0.00650107 |
| 1076 | VDR       | chr12:48235319-48298814       | PDT      | ATRA+PDT | 6.92137  | 4.76545 | -0.538444         | 0.00005 | 0.00102476 |
| 1077 | VEZF1     | chr17:56048909-56065615       | PDT      | ATRA+PDT | 20.2986  | 25.483  | 0.328156          | 0.00095 | 0.0131061  |
| 1078 | VIL1      | chr2:219283837-219314248      | PDT      | ATRA+PDT | 31.2981  | 16.9876 | -0.881593         | 0.00005 | 0.00102476 |
| 1079 | VMA21     | chrX:150565656-150577836      | PDT      | ATRA+PDT | 18.8352  | 15.2752 | -0.302238         | 0.0022  | 0.024728   |
| 1080 | VSIG10L   | chr19:51834794-51845378       | PDT      | ATRA+PDT | 7.17934  | 10.1251 | 0.49601           | 0.00005 | 0.00102476 |
| 1081 | VWA1      | chr1:1370902-1378262          | PDT      | ATRA+PDT | 11.894   | 8.45271 | -0.492746         | 0.00005 | 0.00102476 |
| 1082 | VWA2      | chr10:11599017-116049751      | PDT      | ATRA+PDT | 1.92412  | 3.07645 | 0.677069          | 0.00005 | 0.00102476 |
| 1083 | WARS      | chr14:100800124-100842680     | PDT      | ATRA+PDT | 48.7871  | 59.4294 | 0.284679          | 0.00405 | 0.0405304  |
| 1084 | WBP5      | chrX:102611379-102613397      | PDT      | ATRA+PDT | 13.9992  | 18.3838 | 0.393092          | 0.00165 | 0.0198632  |
| 1085 | WDR19     | chr4:39184023-39287430        | PDT      | ATRA+PDT | 2.8049   | 3.69424 | 0.397329          | 0.00245 | 0.0267496  |
| 1086 | WFDC2     | chr20:44098393-44110172       | PDT      | ATRA+PDT | 2.28187  | 6.53873 | 1.51879           | 0.0021  | 0.0238805  |
| 1087 | WHAMM     | chr15:83477972-83503613       | PDT      | ATRA+PDT | 5.53372  | 6.93922 | 0.326523          | 0.0048  | 0.0461751  |
| 1088 | WNK4      | chr17:40932648-40949084       | PDT      | ATRA+PDT | 1.35766  | 0.74025 | -0.875036         | 0.00005 | 0.00102476 |
| 1089 | WNT11     | chr11:75897369-75917574       | PDT      | ATRA+PDT | 4.1994   | 1.77853 | -1.2395           | 0.00005 | 0.00102476 |
| 1090 | WWC3      | chrX:9983794-10112518         | PDT      | ATRA+PDT | 1.36101  | 2.01822 | 0.568405          | 0.00005 | 0.00102476 |
| 1091 | XPA       | chr9:100437190-100459691      | PDT      | ATRA+PDT | 7.37596  | 5.13513 | -0.522429         | 0.00045 | 0.00719326 |
| 1092 | ZAK       | chr2:173940564-174146764      | PDT      | ATRA+PDT | 21.2333  | 15.5073 | -0.453377         | 0.00005 | 0.00102476 |
| 1093 | ZBTB10    | chr8:81398447-81434610        | PDT      | ATRA+PDT | 1.3336   | 2.32843 | 0.804026          | 0.00005 | 0.00102476 |
| 1094 | ZBTB4     | chr17:7362684-7387568         | PDT      | ATRA+PDT | 2.95671  | 4.5059  | 0.60782           | 0.00005 | 0.00102476 |
| 1095 | ZC3H12A   | chr1:37940118-37949978        | PDT      | ATRA+PDT | 14.3521  | 18.3946 | 0.358025          | 0.00105 | 0.0140676  |
| 1096 | ZC3H6     | chr2:113033177-113097640      | PDT      | ATRA+PDT | 1.08125  | 1.53073 | 0.501519          | 0.00015 | 0.00281494 |
| 1097 | ZC3HAV1   | chr7:138728265-138794465      | PDT      | ATRA+PDT | 26.4315  | 36.6715 | 0.472401          | 0.00005 | 0.00102476 |
| 1098 | ZC3HAV1L  | chr7:138710451-138720775      | PDT      | ATRA+PDT | 3.21045  | 1.95516 | -0.715491         | 0.001   | 0.0135165  |
| 1099 | ZDHHC23   | chr3:113666747-113681827      | PDT      | ATRA+PDT | 6.00029  | 4.23378 | -0.503085         | 0.00005 | 0.00102476 |
| 1100 | ZFAND2A   | chr7:1192542-1199855          | PDT      | ATRA+PDT | 98.4655  | 139.074 | 0.498159          | 0.00005 | 0.00102476 |
| 1101 | ZFHX3     | chr16:72816785-73092534       | PDT      | ATRA+PDT | 2.83608  | 3.50976 | 0.307476          | 0.0051  | 0.048623   |
| 1102 | ZFP36     | chr19:39897486-39900045       | PDT      | ATRA+PDT | 69.397   | 85.3345 | 0.298256          | 0.0029  | 0.0310283  |
| 1103 | ZFP36L1   | chr14:69254371-69262960       | PDT      | ATRA+PDT | 30.635   | 39.7444 | 0.375571          | 0.00005 | 0.00102476 |
| 1104 | ZHX2      | chr8:123793900-123986755      | PDT      | ATRA+PDT | 4.98183  | 7.87996 | 0.661512          | 0.00005 | 0.00102476 |
| 1105 | ZNF143    | chr11:9482511-9550071         | PDT      | ATRA+PDT | 10.1289  | 12.9935 | 0.359311          | 0.00165 | 0.0198632  |
| 1106 | ZNF184    | chr6:27418520-27440897        | PDT      | ATRA+PDT | 4.11238  | 5.61524 | 0.449374          | 0.0009  | 0.0125788  |
| 1107 | ZNF189    | chr9:104161162-104172942      | PDT      | ATRA+PDT | 4.06617  | 5.74544 | 0.498748          | 0.0001  | 0.00194145 |
| 1108 | ZNF195    | chr11:3379156-3400452         | PDT      | ATRA+PDT | 19.9948  | 25.1975 | 0.333654          | 0.00115 | 0.0151042  |
| 1109 | ZNF200    | chr16:3272324-3285457         | PDT      | ATRA+PDT | 4.65756  | 3.54515 | -0.393726         | 0.0017  | 0.0202822  |
| 1110 | ZNF212    | chr7:148936741-148952700      | PDT      | ATRA+PDT | 14.9627  | 18.5768 | 0.31213           | 0.00345 | 0.0359757  |
| 1111 | ZNF213    | chr16:3185056-3192805         | PDT      | ATRA+PDT | 2.20527  | 2.92962 | 0.409759          | 0.0037  | 0.0379161  |
| 1112 | ZNF292    | chr6:87865268-87973406        | PDT      | ATRA+PDT | 5.00352  | 6.18856 | 0.306661          | 0.003   | 0.0318746  |
| 1113 | ZNF334    | chr20:45129706-45142194       | PDT      | ATRA+PDT | 3.43199  | 4.67598 | 0.446221          | 0.0016  | 0.0194588  |
| 1114 | ZNF473    | chr19:50529211-50552031       | PDT      | ATRA+PDT | 28.2838  | 35.599  | 0.33186           | 0.001   | 0.0135165  |
| 1115 | ZNF488    | chr10:48355088-48373866       | PDT      | ATRA+PDT | 3.47533  | 6.63871 | 0.933755          | 0.00005 | 0.00102476 |
| 1116 | ZNF513    | chr2:27600097-27603611        | PDT      | ATRA+PDT | 10.3136  | 13.352  | 0.372507          | 0.002   | 0.0229388  |
| 1117 | ZNF516    | chr18:74069636-74207146       | PDT      | ATRA+PDT | 2.15709  | 3.05855 | 0.503761          | 0.00005 | 0.00102476 |
| 1118 |           |                               |          |          |          |         |                   |         |            |

Table S1: Significant differentially expressed genes (DEGs) after ATRA+PDT compared to PDT.

| #    | gene      | locus                    | sample_1 | sample_2 | value_1 | value_2 | log2(fold_change) | p_value | q_value    |
|------|-----------|--------------------------|----------|----------|---------|---------|-------------------|---------|------------|
| 1123 | ZNF76     | chr6:35227509-35263760   | PDT      | ATRA+PDT | 7.93857 | 10.2398 | 0.367238          | 0.00195 | 0.0225592  |
| 1124 | ZNF764    | chr16:30565084-30569642  | PDT      | ATRA+PDT | 1.23965 | 1.95514 | 0.657332          | 0.0021  | 0.0238805  |
| 1125 | ZNF776    | chr19:58258163-58269527  | PDT      | ATRA+PDT | 8.13752 | 10.4735 | 0.364081          | 0.0005  | 0.00788626 |
| 1126 | ZNF823    | chr19:11832079-11849760  | PDT      | ATRA+PDT | 4.46785 | 6.29258 | 0.494072          | 0.0003  | 0.00511725 |
| 1127 | ZNFX1-AS1 | chr20:47862438-47905795  | PDT      | ATRA+PDT | 399.818 | 534.27  | 0.418226          | 0.00295 | 0.0315316  |
| 1128 | ZSWIM6    | chr5:60628099-60841999   | PDT      | ATRA+PDT | 9.50869 | 12.4155 | 0.384823          | 0.00005 | 0.00102476 |
| 1129 | ZYX       | chr7:143078359-143220540 | PDT      | ATRA+PDT | 77.6904 | 119.543 | 0.621723          | 0.00005 | 0.00102476 |
